# Supplementary material for: Proteomic Profiling of Extracellular Vesicles Isolated from Plasma and Peritoneal Exudate in Mice Induced by Crotalus scutulatus scutulatus Crude Venom and Its Purified Cysteine-Rich Secretory Protein (Css-CRiSP)
Source: Toxins (Basel). 2023 Jul 2;15(7):434. doi: 10.3390/toxins15070434 (PMC10467150; doi:10.3390/toxins15070434)
Supplement: Supplementary file 1 [file toxins-15-00434-s001.zip › Supplementary Tables 1 through 13.xlsx]

## Sheet: S1
Table S1. List of identified proteins from E-EVs.
Accession	Description	# Peptides	# Unique Peptides	E-cEV (log2Abundance_1)	E-cEV (log2Abundance_2)	E-cEV (log2Abundance_3)	E-vEV (log2Abundance_1)	E-vEV (log2Abundance_2)	E-vEV (log2Abundance_3)	E-CRiSP-EV (log2Abundance_1)	E-CRiSP-EV (log2Abundance_2)	E-CRiSP-EV (log2Abundance_3)
P50171	(3R)-3-hydroxyacyl-CoA dehydrogenase	6	6	23.1071	22.9462	23.175
Q6ZPJ3	(E3-independent) E2 ubiquitin-conjugating enzyme UBE2O	30	30	27.5242	27.4683	27.2851	25.8437	25.824	26.0014	26.6626	26.5995	26.5992
Q8VDP3	[F-actin]-monooxygenase MICAL1	1	1
Q9D517	1-acyl-sn-glycerol-3-phosphate acyltransferase gamma	1	1	19.9827	20.405	20.4993	20.144	20.055
P51432	1-phosphatidylinositol 4,5-bisphosphate phosphodiesterase beta-3	14	14	21.9477	22.7965	23.3594	22.2249	21.3963	22.1398	23.4799	22.7171	22.6543
Q8R3B1	1-phosphatidylinositol 4,5-bisphosphate phosphodiesterase delta-1	17	17	25.9547	26.0463	26.0178	25.7233	25.8733	25.964	25.1883	24.9124	24.8481
Q64433	10 kDa heat shock protein, mitochondrial	6	6	27.097	27.1405	27.0716	25.6183	25.7935	25.8717	24.833	24.9043	24.834
G3UZ34	116 kDa U5 small nuclear ribonucleoprotein component	4	2	20.1276	20.8725	20.599			19.5369	20.6933
Q9CQV8	14-3-3 protein beta/alpha	4	2	22.9361	22.9772	22.4441	22.1681	21.9289	21.3464	22.3873	22.0817	22.3516
P62259	14-3-3 protein epsilon	3	2	19.5059	19.6401		19.3822	19.8124		21.866	21.5164	20.451
P61982	14-3-3 protein gamma	3	2	21.0069	19.7526	19.0334	17.7416	18.3917	17.9896	18.5776	18.3376	18.785
P68254	14-3-3 protein theta	5	3	26.6238	26.5964	26.5505	25.272	25.3007	25.3967	25.2943	25.3806	25.1198
Q8VCC1	15-hydroxyprostaglandin dehydrogenase [NAD(+)]	3	3	26.6402	26.925	26.8834	25.4534	25.3104	25.3812	26.2374	26.244	26.1421
A8Y5N4	17-beta-hydroxysteroid dehydrogenase 13	5	3	20.4308	19.8615	21.4176	22.152	22.9807	22.8077	23.5616	24.2419	24.1317
Q9R092	17-beta-hydroxysteroid dehydrogenase type 6	11	7	23.995	24.0056	23.6499	23.5304	24.0476	23.7467	24.8216	24.8724	24.7971
P58871	182 kDa tankyrase-1-binding protein	20	20	24.5096	25.0037	24.6952	22.7365	23.0966	22.8646	23.8249	23.3776	23.3824
Q05921	2-5A-dependent ribonuclease	1	1
O88986	2-amino-3-ketobutyrate coenzyme A ligase, mitochondrial	1	1	20.4542	20.1327	19.9847
Q8BH00	2-aminomuconic semialdehyde dehydrogenase	16	16	28.0046	28.3372	28.1892	27.1955	27.1778	27.2331	28.2472	27.5629	27.7082
Q60597	2-oxoglutarate dehydrogenase, mitochondrial	14	14	24.3872	24.5049	24.3622	23.5743	23.5498	23.5182	21.8981	22.148	22.886
Q3U3J1	2-oxoisovalerate dehydrogenase subunit alpha	3	3	21.3956	21.6157	20.4922
B0QZL1	2-phospho-D-glycerate hydro-lyase (Fragment)	11	1	22.4055	21.9329	22.3107	24.4708	24.8111	24.5134	24.2356	24.597	24.5453
J3QPZ9	2-phospho-D-glycerate hydro-lyase (Fragment)	8	1	24.3499	24.3855	24.0978	25.0583	24.7855	24.9077	24.7884	24.506	24.3796
Q9CQ62	2,4-dienoyl-CoA reductase [(3E)-enoyl-CoA-producing], mitochondrial	10	10	27.1244	26.9879	27.236	26.3085	26.4665	26.4959	24.906	24.9234	25.1126
Q05BJ7	2'-5' oligoadenylate synthase	2	2	19.1988	19.6318	18.66	18.0484	18.2143	18.1715	16.8213		16.7758
Q8VI93	2'-5'-oligoadenylate synthase 3	5	5	20.0458	20.3201	20.4118			19.8686	20.8859	20.6963	20.5142
Q9Z2F2	2'-5'-oligoadenylate synthase-like protein 2	2	2	23.4315	23.5344	23.4957	22.5378	22.3515	23.0503	22.2075	22.429	22.0522
P16330	2',3'-cyclic-nucleotide 3'-phosphodiesterase	8	8	23.6251	23.8689	23.6611	22.9472	23.0995	22.6928	23.6362	23.6513	23.3955
Q3TXS7	26S proteasome non-ATPase regulatory subunit 1	23	23	26.4022	26.3876	27.0253	26.7195	26.972	26.7125	27.1379	27.1392	27.0921
Q8BG32	26S proteasome non-ATPase regulatory subunit 11	19	19	27.714	27.8667	27.6272	27.7114	27.6892	27.7412	28.0184	27.934	27.9035
Q9D8W5	26S proteasome non-ATPase regulatory subunit 12	18	18	25.7851	25.9915	25.826	24.9859	25.5176	25.1787	25.5673	25.4223	25.2609
Q9WVJ2	26S proteasome non-ATPase regulatory subunit 13	14	14	25.7376	25.5251	25.5091	25.9962	26.2302	26.4259	25.7826	25.2689	25.6686
O35593	26S proteasome non-ATPase regulatory subunit 14	8	8	26.344	26.2848	26.3064	24.6989	24.7244	24.8915	24.4484	24.2195	24.4479
Q8VDM4	26S proteasome non-ATPase regulatory subunit 2	22	22	26.6132	26.4227	26.5524	26.3187	26.3751	26.4296	26.976	26.8824	26.8835
P14685	26S proteasome non-ATPase regulatory subunit 3	18	18	25.3033	25.3618	25.2047	24.7889	24.612	24.9024	25.5074	25.5934	25.7066
O35226	26S proteasome non-ATPase regulatory subunit 4	9	9	25.1623	25.2037	25.2131	24.0529	23.9012	23.9331	25.7904	25.9239	25.7944
Q8BJY1	26S proteasome non-ATPase regulatory subunit 5	16	16	24.5986	24.4887	24.6007	23.9559	23.8862	24.2231	24.9325	24.9136	25.066
Q99JI4	26S proteasome non-ATPase regulatory subunit 6	15	15	29.4016	29.3555	29.3674	29.8132	29.69	29.5477	29.4722	29.2638	29.1359
P26516	26S proteasome non-ATPase regulatory subunit 7	10	10	26.8032	26.8306	26.9928	26.2391	26.3189	26.1763	26.1267	25.9802	26.1907
Q9CX56	26S proteasome non-ATPase regulatory subunit 8	3	3	22.8695	22.8549	22.8557	23.4189	23.2912	23.1698	22.565	22.398	22.4184
Q9CR00	26S proteasome non-ATPase regulatory subunit 9	8	8	22.728	22.6559	22.8938	21.6072	20.7198	21.5657	22.9574	22.7999	22.6628
P62334	26S proteasome regulatory subunit 10B	15	15	24.2662	24.6504	24.2387	24.1716	24.4859	23.5868	24.9206	25.8835	25.0408
P62192	26S proteasome regulatory subunit 4	16	15	27.2147	27.3929	27.416	27.3655	28.3378	27.9849	26.2787	26.0959	26.0655
O88685	26S proteasome regulatory subunit 6A	11	11	24.3144	24.0368	23.8486	22.9135	23.6664	24.7254	27.6065	27.4617	27.5281
P54775	26S proteasome regulatory subunit 6B	13	13	24.7003	24.1329	24.8682	27.2394	27.0419	27.2686	27.1664	27.2054	27.0343
P46471	26S proteasome regulatory subunit 7	24	24	26.8754	26.8938	26.8008	26.5184	26.3876	26.3717	27.393	27.2957	27.2462
P62196	26S proteasome regulatory subunit 8	20	19	26.4858	26.3474	26.4008	25.9261	25.9687	26.0427	26.6765	26.836	26.8383
Q3UHX2	28 kDa heat- and acid-stable phosphoprotein	5	5	24.5124	24.4083	24.6049	23.3829	22.0825	23.4532	24.4293	24.6433	25.162
G3X9M0	28S ribosomal protein S29, mitochondrial	1	1
Q9D7N3	28S ribosomal protein S9, mitochondrial	5	5	20.9568	21.4615	20.7519	22.3939	22.5002	22.3672	22.4432	22.2672	22.2872
P26150	3 beta-hydroxysteroid dehydrogenase/Delta 5-->4-isomerase type 3	3	3	20.928	21.0291	21.6279	19.4578	19.4594	19.2641	21.29	22.3209	22.3394
Q91WT7	3-alpha-hydroxysteroid dehydrogenase type 1	14	13	25.6834	25.6311	25.7924	24.6163	24.9239	24.4729	25.6314	25.807	25.9564
P70245	3-beta-hydroxysteroid-Delta(8),Delta(7)-isomerase	2	2								23.6307
A2AFQ2	3-hydroxyacyl-CoA dehydrogenase type-2	11	11	29.0783	28.7131	28.4103	26.9761	27.0333	26.6025	26.7494	26.8727	27.0242
Q8JZV9	3-hydroxybutyrate dehydrogenase type 2	3	3	22.349	22.2806	22.9297	22.3194	22.572	22.2598	22.547	22.943	22.5035
Q99L13	3-hydroxyisobutyrate dehydrogenase, mitochondrial	5	5	22.6929	22.8508	23.4514	21.1445	21.4163	18.8113	20.181	19.4772
Q921H8	3-ketoacyl-CoA thiolase A, peroxisomal	11	5	22.9252	23.0006	23.5343	22.683	22.7423	22.7819	23.5631	23.79	23.6811
Q8VCH0	3-ketoacyl-CoA thiolase B, peroxisomal	12	6	26.9796	26.7075	26.7419	26.2072	26.0362	26.1039	26.7943	26.7966	26.6663
Q8BWT1	3-ketoacyl-CoA thiolase, mitochondrial	23	23	29.2893	29.3156	29.3389	28.9458	28.886	28.8714	28.9526	28.927	28.8647
Q99J99	3-mercaptopyruvate sulfurtransferase	9	9	25.4275	25.5578	25.2103	23.594	23.8533	23.953	24.2429	24.3726	24.2615
A0A494BB18	3'-phosphoadenosine-5'-phosphosulfate synthase	30	29	27.8445	27.4974	27.4854	27.1443	27.2459	26.9327	28.4076	28.4414	28.5311
Q9JKF7	39S ribosomal protein L39, mitochondrial	1	1	24.7426	24.551	24.3369	23.4935	22.4348	21.7438
F8VPN4	4-alpha-glucanotransferase	33	33	27.217	27.2357	27.0066	27.1222	27.2503	27.3002	26.4889	26.5205	26.4811
P49429	4-hydroxyphenylpyruvate dioxygenase	14	14	25.5419	26.247	25.2421	25.3966	24.2645	22.9522	27.1635	27.5368	27.6815
Q9JLJ2	4-trimethylaminobutyraldehyde dehydrogenase	23	23	26.5991	26.8346	27.0332	27.1164	27.1497	27.024	27.3759	27.4172	27.4183
Q00558	40-kDa huntingtin-associated protein	1	1
P63325	40S ribosomal protein S10	4	4	23.1981	23.578	23.5538	22.1869	22.3811	23.346	22.5459	22.4779	22.2622
P62281	40S ribosomal protein S11	6	6	22.9088	22.9636	22.3487	20.558	20.4015	20.5069	22.8531	22.56	22.6214
F7AEH4	40S ribosomal protein S12	8	8	26.0719	25.56	25.7698	25.1886	25.2951	25.1397	25.7738	26.1807	26.3224
Q921R2	40S ribosomal protein S13	1	1	22.2279	22.474	22.6132	20.7009	20.5298	20.7486		20.6746	20.5547
P62264	40S ribosomal protein S14	4	4	23.2772	24.0848	24.233	22.8421	22.9552	22.8747	24.3471	24.4059	25.7383
P62843	40S ribosomal protein S15	1	1
P62245	40S ribosomal protein S15a	7	7	25.3054	25.2243	25.3262	24.7237	24.6328	24.8622	26.1435	26.1431	25.8801
P14131	40S ribosomal protein S16	5	5	23.6454	23.7008	23.6845	21.2871	22.1182	20.0049	23.8184	24.0532	24.3195
P63276	40S ribosomal protein S17	2	2	22.1449	21.3994	21.3109					19.9748	20.5086
P62270	40S ribosomal protein S18	8	8	23.6585	23.912	23.5136	22.6564	22.0798	22.1679	23.7721	23.376	23.2442
Q9CZX8	40S ribosomal protein S19	7	7	23.2747	23.4197	24.7903	23.2482	23.4791	23.3265	24.6606	25.3372	25.2708
P25444	40S ribosomal protein S2	5	5	22.6292	22.5793	22.417	21.5428	21.5988	21.7588	21.8492	21.7141	21.4746
P60867	40S ribosomal protein S20	4	4	26.3795	25.9537	26.0272	27.083	27.0895	27.4246	27.267	27.3286	27.1704
P62267	40S ribosomal protein S23	2	2	22.0863	22.0057	21.9455	20.6869		20.7606	22.0636	22.0719	22.3404
P62849	40S ribosomal protein S24	1	1
P62852	40S ribosomal protein S25	4	4	25.1173	24.7802	25.7301	23.8279	24.5148	23.995	24.6396	25.0278	24.9158
P62855	40S ribosomal protein S26	1	1				20.5762	20.8273	20.8959	20.0649	20.9918	20.639
Q6ZWU9	40S ribosomal protein S27	5	1	24.3009	24.4259	24.2373	23.9319	23.6546	23.6965	25.3323	25.1514	25.1964
Q6ZWY3	40S ribosomal protein S27-like	5	1	20.1923	20.2998	20.6145				20.9294	20.9989	21.4036
P62908	40S ribosomal protein S3	16	16	27.6702	27.5222	27.4725	28.1674	28.1205	28.1157	27.9426	28.0547	27.8954
P97351	40S ribosomal protein S3a	14	14	27.1963	27.312	27.265	27.3752	27.3586	27.4648	28.1195	28.1677	28.1464
P62702	40S ribosomal protein S4, X isoform	13	13	26.0962	26.2222	26.1854	25.184	25.4988	25.6663	26.4328	26.4335	26.4699
P97461	40S ribosomal protein S5	6	6	25.7456	25.6122	25.4447	23.2076	23.4439	23.3036	24.5923	24.3678	24.3467
P62754	40S ribosomal protein S6	1	1	19.3219	19.0186	19.4432				20.4175	20.1161	20.7183
P62082	40S ribosomal protein S7	6	6	23.2724	23.211	22.1208	20.9187	22.3922	22.676	23.1731	23.2151	23.1692
P62242	40S ribosomal protein S8	4	4	22.4455	22.3452	22.5886	21.9784	21.8481	21.8407	23.3229	23.6458	22.893
Q6ZWN5	40S ribosomal protein S9	6	6	24.5068	22.7678	22.4181	19.9722	21.5202	19.8774	21.1774	20.4286
P14206	40S ribosomal protein SA	6	6	24.3463	24.414	24.439	23.5671	24.0163	23.7871	24.2551	24.2284	24.1464
A0A140LIF0	5-demethoxyubiquinone hydroxylase, mitochondrial	1	1	19.8599	19.9859	19.7702
Q9CRB3	5-hydroxyisourate hydrolase	2	2	21.4931	21.531	21.6939			19.7452	19.6498	20.2035	19.7226
Q8K010	5-oxoprolinase	4	4	21.1244	21.1731	22.0142
Q9DBR1	5'-3' exoribonuclease 2	1	1
Q5EG47	5'-AMP-activated protein kinase catalytic subunit alpha-1	9	9	22.8305	22.8169	22.6146	19.9531	20.1602	17.9363	22.0456	21.8142	21.9317
Q9R078	5'-AMP-activated protein kinase subunit beta-1	5	5	23.6755	23.6973	23.5907	21.1274	21.9936	21.2542	23.7432	23.5586	23.4695
Q6PAM0	5'-AMP-activated protein kinase subunit beta-2	1	1	21.0567	20.6392	21.1068	20.723	21.1016	19.9788	21.8845	21.5238	21.5041
O54950	5'-AMP-activated protein kinase subunit gamma-1	12	12	24.1616	23.9859	24.1294	24.211	24.3694	24.1195	24.3141	24.6655	24.7078
P70290	55 kDa erythrocyte membrane protein	16	16	26.2777	26.292	26.3553	26.4688	26.5656	26.4621	27.4094	27.4462	27.3309
A0A087WRG0	6-phosphofructo-2-kinase	1	1
P70266	6-phosphofructo-2-kinase/fructose-2,6-bisphosphatase 1	1	1
Q9DCD0	6-phosphogluconate dehydrogenase, decarboxylating	16	16	29.0494	28.9277	28.7141	28.8689	28.6036	28.7524	29.244	29.2024	29.2209
P63038	60 kDa heat shock protein, mitochondrial	27	27	28.7727	28.6633	28.586	26.9551	26.8613	26.8669	26.8751	26.8507	26.9742
O08848	60 kDa SS-A/Ro ribonucleoprotein	1	1
P14869	60S acidic ribosomal protein P0	9	9	26.5643	26.5968	26.6372	26.2569	26.2969	26.4187	26.4806	26.5292	26.4937
P99027	60S acidic ribosomal protein P2	1	1
Q6ZWV3	60S ribosomal protein L10	3	3	20.8831			20.9374	20.9294		21.5185		21.2384
P53026	60S ribosomal protein L10a	6	6	25.0136	25.0138	24.7847	22.5867	22.3728	22.7687	24.2945	24.4878	24.0624
Q9CXW4	60S ribosomal protein L11	6	6	23.5595	23.5752	23.3829	23.7707	23.8319	23.7708	22.5365	22.8621	22.695
P35979	60S ribosomal protein L12	7	7	26.078	26.6481	26.4179	25.9994	26.051	25.8442	25.7549	25.5565	25.7401
P47963	60S ribosomal protein L13	5	5	23.2953	23.225	23.3386	22.1343	22.2546	22.3064	23.1314	23.1282	23.5584
Q9CR57	60S ribosomal protein L14	1	1	20.4547	20.4442	20.2334				20.9344
Q9CZM2	60S ribosomal protein L15	4	4	22.8949	22.6676	22.4266	21.1188	19.8235	22.3085	21.9927	22.1175	23.5085
Q9CPR4	60S ribosomal protein L17	3	3	24.9974	25.1323	24.7098	24.5096	24.3381	24.5041	24.1771	24.3226	24.3374
P35980	60S ribosomal protein L18	2	2	21.4931	21.5587	21.1949	19.7025	19.7047		20.4367	20.3965	20.1747
A0A1D5RME4	60S ribosomal protein L18a (Fragment)	1	1	19.8036	19.9082
P84099	60S ribosomal protein L19	4	4	21.931	22.5408	21.9151	20.4775	20.877	20.913	20.6353	20.714	20.5085
O09167	60S ribosomal protein L21	5	5	23.8664	23.5382	23.5001	22.8413	22.7706	22.6961	23.6628	23.586	23.6319
P67984	60S ribosomal protein L22	4	4	24.9949	25.1053	25.1151	25.3003	25.3052	25.3514	26.3262	25.9501	26.289
P62830	60S ribosomal protein L23	2	2	19.713	22.1324	20.6677	19.3808	19.2652	19.5271	20.8167	20.9378	20.7736
P62751	60S ribosomal protein L23a	7	7	27.3638	27.1341	27.118	26.4554	26.4489	26.441	27.1643	27.1122	27.1321
Q8BP67	60S ribosomal protein L24	1	1
B1ARA5	60S ribosomal protein L26	1	1	17.4805	17.7502	17.2375		14.4888		16.5767
P14115	60S ribosomal protein L27a	2	2				24.5022	24.3085	24.5653	25.6547	26.1684	26.3867
P41105	60S ribosomal protein L28	4	4	24.4792	24.554	24.1662	23.9277	23.7176	23.4656	23.8808	23.5345	23.8907
P27659	60S ribosomal protein L3	4	4	21.2952	22.7617	21.6175	22.5743	22.3421	22.4071	23.3659	21.8855	21.7445
P62889	60S ribosomal protein L30	6	6	24.3272	24.0127	24.3294	23.7261	23.9845	24.1031	24.4813	24.3348	24.4147
P62911	60S ribosomal protein L32	2	2	21.9247	22.0036	22.0111				22.7907	22.5331	22.949
A0A0G2JGY8	60S ribosomal protein L34 (Fragment)	1	1
Q6ZWV7	60S ribosomal protein L35	3	3		20.9154		20.2107	20.2484	20.6348	20.6377
O55142	60S ribosomal protein L35a	1	1		17.5893	17.1741
P61514	60S ribosomal protein L37a	3	3	24.1591	24.4353	24.3057	25.64	23.7237	26.318	24.8128	24.9166	24.5074
Q9JJI8	60S ribosomal protein L38	3	3	24.7153	24.4436	24.6053	24.6753	24.9606	25.0614	25.2404	25.1914	25.2346
Q9D8E6	60S ribosomal protein L4	4	4	22.5943	22.2999	22.5044	22.0307	22.4702	22.3174	23.1987	23.0588	23.0257
P47962	60S ribosomal protein L5	11	11	25.661	25.4341	25.6292	25.3644	25.1753	25.1283	26.1764	26.2001	25.9979
P47911	60S ribosomal protein L6	5	5	24.723	24.4811	24.7433	25.5217	25.4893	25.4588	25.8656	26.2694	26.3113
P14148	60S ribosomal protein L7	4	4	20.8016	21.5096	19.6687	19.5618
P12970	60S ribosomal protein L7a	11	11	24.4376	24.7513	24.3001	23.1886	23.2317	22.9868	24.6647	25.0844	24.9534
P62918	60S ribosomal protein L8	5	5	22.7687	22.6055	22.3016	19.6502	19.3479	19.5837	22.4019	22.5286	22.2806
P51410	60S ribosomal protein L9	4	4	23.3803	23.342	23.6348	21.9741	23.0261	22.2197	23.5707	23.9436	23.9054
A0A140LIT2	7-dehydrocholesterol reductase	1	1	20.6469		20.0921	20.2673			21.3366	21.4445	21.2683
P33434	72 kDa type IV collagenase	19	19	26.3886	26.0899	26.0862	26.1669	26.2941	26.1792	25.2376	25.2904	25.2977
O08715	A-kinase anchor protein 1, mitochondrial	1	1	18.67	18.3686		16.4732	15.6677	16.0464	17.0715	17.073
Q9WTQ5	A-kinase anchor protein 12	6	6	22.3987	22.4781	23.0035	22.8105	22.8071	22.6795	23.2219	23.2104	21.4515
O54931	A-kinase anchor protein 2	7	7	22.1445	22.1551	21.9943	19.6189	19.379	19.0703	19.7041	19.5258	19.1627
Q8K442	ABC-type organic anion transporter ABCA8A	4	4	23.4488	23.4106	22.958	20.425	19.7076	22.1345	20.5044	20.6024	20.6939
A0A338P6W9	ABI family member 3-binding protein	1	1
Q8CBW3	Abl interactor 1	6	6	23.4423	22.6078	22.5018	22.3169	22.4827	21.1264	23.3253	23.2003	23.2613
Q4KL52	Abscission/NoCut checkpoint regulator	1	1	16.5619	16.2695	15.2543	14.0994	15.1052	14.3217	16.1187	16.0394	16.2146
Q9D2R0	Acetoacetyl-CoA synthetase	12	12	23.7348	23.7847	23.7544	22.5382	22.7291	22.9218	23.708	23.7816	23.4587
Q8CAY6	Acetyl-CoA acetyltransferase, cytosolic	10	10	25.3362	25.3062	25.3734	25.0592	24.7891	25.1627	25.6254	25.7162	25.2871
Q8QZT1	Acetyl-CoA acetyltransferase, mitochondrial	15	15	27.5168	27.4995	27.5298	26.4263	26.16	26.3084	26.6193	26.9678	26.3123
Q5SWU9	Acetyl-CoA carboxylase 1	7	7	24.9218	24.4186	24.6566	25.061	25.0689	25.2596	25.4593	25.1043	25.0799
Q9QXG4	Acetyl-coenzyme A synthetase, cytoplasmic	17	17	28.5418	28.5777	28.3386	29.084	28.5618	28.4631	29.457	29.3572	29.2877
Q9DBK0	Acetyl-coenzyme A thioesterase	6	6	22.8198	23.2036	22.8989	21.5966	21.3257	20.3627		20.4428	19.9029
Q99J27	Acetyl-coenzyme A transporter 1	1	1	19.756	19.6521	19.7039	19.6982			19.7113	19.5423	19.4638
Q9JI19	Acidic fibroblast growth factor intracellular-binding protein	1	1
Q99KI0	Aconitate hydratase, mitochondrial	28	28	28.414	28.374	28.4511	27.1353	27.2665	27.2649	27.8977	27.7589	27.7753
E9Q9C7	Actin-binding LIM protein 1	1	1
Q91WC0	Actin-histidine N-methyltransferase	4	4	23.1614	23.227	23.0723	23.0995	23.4657	23.7039	24.0754	24.0201	23.9637
Q9QZB7	Actin-related protein 10	8	8	25.934	25.9215	25.9031	25.6958	25.6388	25.6458	26.1287	25.9801	25.8605
P61161	Actin-related protein 2	14	14	26.7349	26.6841	26.8994	27.0827	27.3269	27.2491	27.5497	27.8519	27.7637
Q9R0Q6	Actin-related protein 2/3 complex subunit 1A	3	3	21.9611	22.0892	22.0833	21.8554	22.2873	22.347	23.0047	22.4823	22.5375
Q9WV32	Actin-related protein 2/3 complex subunit 1B	15	15	27.1985	27.2968	27.1584	25.6743	25.7646	25.9197	26.71	26.351	26.4495
Q9CVB6	Actin-related protein 2/3 complex subunit 2	11	11	27.8277	27.9932	27.9789	26.582	26.6342	26.68	26.9108	27.1041	26.9889
Q9JM76	Actin-related protein 2/3 complex subunit 3	6	6	26.6774	26.7387	26.4929	25.3924	25.2711	25.4753	26.7157	26.4753	26.4775
P59999	Actin-related protein 2/3 complex subunit 4	5	5	27.0043	27.0525	26.9347	26.1015	26.2457	26.1842	26.3167	26.5272	26.6039
Q9CPW4	Actin-related protein 2/3 complex subunit 5	6	6	25.6711	25.5204	25.4408	24.487	24.4795	24.3922	25.1372	25.1175	25.1974
Q9D898	Actin-related protein 2/3 complex subunit 5-like protein	3	3	20.1719	21.1746	20.5964		18.8579
Q99JY9	Actin-related protein 3	19	19	28.3056	28.4275	28.3722	27.8775	28.0048	27.9732	28.1312	28.014	28.0328
P68033	Actin, alpha cardiac muscle 1	18	1	27.3618	27.1741	27.5554	25.4278	25.6721	25.6771	26.001	25.9693	26.1275
P68134	Actin, alpha skeletal muscle	18	1	20.2787	19.8817	20.6534		20.4908
P60710	Actin, cytoplasmic 1	21	11	30.0028	30.2393	29.9984	28.1643	28.3676	28.4269	29.0018	28.9139	29.0447
P11031	Activated RNA polymerase II transcriptional coactivator p15	5	5	26.6921	25.5859	25.8111	23.75	23.7881	24.0374	26.4485	26.6566	26.7047
Q7TT18	Activating transcription factor 7-interacting protein 1	1	1
Q8BK64	Activator of 90 kDa heat shock protein ATPase homolog 1	8	8	23.8551	23.6058	23.9329	22.8441	23.3983	23.2281	23.3067	23.7959	23.8612
Q5SSL4	Active breakpoint cluster region-related protein	2	1
Q8K370	Acyl-CoA dehydrogenase family member 10	5	5	27.3158	27.2813	27.2767	26.0909	25.9075	26.2113	26.2401	26.1326	26.1131
A0A0R4J0I6	Acyl-CoA dehydrogenase family member 11	5	5	25.4178	25.5696	25.4105	26.0107	25.7368	26.0204	26.121	26.2072	26.0958
Q08EE8	Acyl-CoA synthetase bubblegum family member 3	1	1	25.6904	25.715	25.8909	26.3554	26.4187	26.3843	26.0855	26.2921	26.3172
Q91YX5	Acyl-CoA:lysophosphatidylglycerol acyltransferase 1	1	1	14.92	14.5218	14.5956	14.2476	14.6485	14.2652	15.8375	15.4918	15.9016
Q8BGG9	Acyl-coenzyme A amino acid N-acyltransferase 2	1	1	18.9297	18.7249	18.7657	18.1444		18.0251		18.8575	18.36
Q9DBS4	Acyl-coenzyme A oxidase-like protein	1	1
Q91VA0	Acyl-coenzyme A synthetase ACSM1, mitochondrial	6	6	21.8202	22.6448	22.01	22.3836	23.5337	22.5606	22.3604	22.5177	22.2851
Q3UNX5	Acyl-coenzyme A synthetase ACSM3, mitochondrial	1	1	22.7203	22.4141	22.7761	21.5061	21.5798			20.2393
Q32MW3	Acyl-coenzyme A thioesterase 10, mitochondrial	3	3	21.4209	21.3349	21.023				20.0031	19.6339	19.9163
Q9CQR4	Acyl-coenzyme A thioesterase 13	4	4	24.986	24.7819	24.5349	25.1432	24.8422	25.1131	25.5869	25.4381	25.437
Q9WTL7	Acyl-protein thioesterase 2	3	3	19.3893	19.7154	19.7796	19.7383		19.5893	20.1833	19.5356	19.7611
P56375	Acylphosphatase-2	1	1	19.5224	19.5935	18.8473	19.1519		18.2791	19.4289	19.3283	19.2741
Q8R0F8	Acylpyruvase FAHD1, mitochondrial	5	5	22.4545	22.2319	22.5744	22.3624	22.6351	22.3658	21.8561	21.7709	21.4945
Q9R0X2	ADAM DEC1	4	4	24.0916	23.6937	23.8117	24.6247	24.5478	24.4608	24.4503	25.1907	24.5317
Q80T21	ADAMTS-like protein 4	1	1	18.3971	18.5009	18.5479	17.8429	17.7808	17.6074	17.5802	17.7152	17.6757
P08030	Adenine phosphoribosyltransferase	5	5	23.9483	24.3445	24.0945	22.6439	22.5448	22.6214	23.5038	23.8999	23.6589
P55264	Adenosine kinase	18	18	28.1792	28.2305	27.9931	27.9947	27.8559	27.9671	28.3248	28.2335	28.028
P50247	Adenosylhomocysteinase	27	26	30.0744	30.0382	30.0554	28.8853	28.9749	29.1707	29.8316	29.7578	29.6996
P97490	Adenylate cyclase type 8	1	1
Q9R0Y5	Adenylate kinase isoenzyme 1	9	9	26.669	26.5357	26.691	26.7965	26.8784	26.9137	26.1142	26.1419	26.0806
P54822	Adenylosuccinate lyase	14	14	27.3792	27.1584	25.2091	26.8734	24.7965	24.6425	24.6604	24.9223	24.9708
P28650	Adenylosuccinate synthetase isozyme 1	18	18	29.6495	29.6408	29.5038	30.1371	29.9934	30.1643	30.2227	30.2748	30.1619
P40124	Adenylyl cyclase-associated protein 1	25	23	29.0298	28.9784	29.5556	29.2416	29.1724	29.2579	29.7105	29.7788	29.6971
Q9CYT6	Adenylyl cyclase-associated protein 2	7	5	19.6573		20.8499	19.4976	18.953	19.6908		20.5195
Q61549	Adhesion G protein-coupled receptor E1	1	1	20.6246	20.2314	20.3001			21.9007
E9QJS7	Adhesion G protein-coupled receptor E5	5	5	22.1423	22.1838	23.151	21.885	22.2534	22.4255	23.3987	23.2786	24.0194
Q640N1	Adipocyte enhancer-binding protein 1	11	11	25.6872	25.569	25.535	24.9722	25.349	25.1108	25.7469	25.5583	25.5565
Q9D7N9	Adipocyte plasma membrane-associated protein	2	2	20.0821	19.6621	19.6954				20.2268
Q60994	Adiponectin	1	1				20.176	20.1537	19.8479			20.6927
Q922B1	ADP-ribose glycohydrolase MACROD1	7	7	26.5824	26.5332	26.4862	26.3741	26.6648	26.7866	27.1348	27.2624	27.2162
Q8R5F3	ADP-ribose glycohydrolase OARD1	1	1	18.7713	18.7688	18.4224	17.6377	17.9392	17.2777	19.432	19.5051	19.2421
P56528	ADP-ribosyl cyclase/cyclic ADP-ribose hydrolase 1	9	9	24.5169	24.4304	24.5381	23.3158	23.145	23.3594	24.3461	23.9481	24.2273
P61205	ADP-ribosylation factor 3	11	8	27.7207	27.6771	27.7339	26.9348	26.8839	26.9949	27.7453	27.8061	27.7883
P61750	ADP-ribosylation factor 4	7	4	26.0585	26.5027	26.1166	25.105	25.5867	25.5215	25.7984	25.6469	25.6467
P84084	ADP-ribosylation factor 5	6	2	22.3145	22.0312	22.3923	21.3335	21.8595	21.8579	23.2567	23.0959	23.0422
P62331	ADP-ribosylation factor 6	6	6	24.1889	24.0259	24.0747	22.9441	23.4816	23.6612	24.3735	24.7029	24.6484
Q99K28	ADP-ribosylation factor GTPase-activating protein 2	7	7	21.629	21.8271	21.8779				20.0369
E9Q3G5	ADP-ribosylation factor interacting protein 1	7	7	23.143	22.8355	22.7592	21.0204	22.281	21.449	24.0503	23.3978	23.8561
Q8R0H9	ADP-ribosylation factor-binding protein GGA1	4	4	20.7458	20.2067	20.2139	20.3652	19.9921	20.5241
P61211	ADP-ribosylation factor-like protein 1	2	2
Q9D0J4	ADP-ribosylation factor-like protein 2	3	3		19.4192	20.1775	19.9743	19.924	20.4262	21.049	20.9262	21.0214
Q9WUL7	ADP-ribosylation factor-like protein 3	2	2
Q9CQW2	ADP-ribosylation factor-like protein 8B	4	4	22.6685	22.5994	22.7282	20.1949	21.2092	20.3773	22.4681	21.6859	21.8029
P48962	ADP/ATP translocase 1	10	6	25.5445	25.582	25.7561	23.1479	22.5363	23.4279	23.1233	23.4728	23.1941
P51881	ADP/ATP translocase 2	11	7	27.1416	26.9273	30.9699	24.3693	31.1048	30.5892	30.8938	31.0846	30.6433
Q60604	Adseverin	1	1	19.132	19.3883	18.3668	19.9996	20.5176	20.446	19.5533	18.6915	19.2209
E9Q852	Afadin	1	1	17.2667	17.5317	16.5589					17.4937	17.6908
Q8JZQ2	AFG3-like protein 2	3	3	20.8456	21.3734	19.5256	21.1563	18.5023	20.3863	20.8768	21.4802	18.0788
Q8CG76	Aflatoxin B1 aldehyde reductase member 2	11	11	25.8992	26.0037	25.8127	25.33	25.3216	25.2742	24.7924	24.8501	25.0526
Q80WT5	Aftiphilin	2	2		17.8665	17.1977	15.5057	16.2297	16.655	17.3889	16.8001	17.852
E9Q616	AHNAK nucleoprotein (desmoyokin)	164	164	30.0755	30.1126	30.3082	29.2428	29.4485	29.1688	29.7063	29.8094	29.7227
A0A7N9VR94	AHNAK nucleoprotein 2	9	9	25.8432	25.5843	25.6919	24.7598	25.3155	25.2188	25.6363	25.8556	25.7677
Q8QZR5	Alanine aminotransferase 1	11	11	24.6578	24.7034	24.9146	23.6781	23.0714	23.6263	24.6534	24.9387	24.9551
H7BWY3	Alanine--glyoxylate aminotransferase 2, mitochondrial	1	1
Q8BGQ7	Alanine--tRNA ligase, cytoplasmic	29	29	27.4344	27.7116	27.6125	27.4272	27.4439	27.6724	27.6493	27.7064	27.6712
P07724	Albumin	23	23	30.0242	30.1226	29.9772	30.1868	30.13	30.1548	30.3556	30.2333	30.3249
F8VQ07	Albumin superfamily member 1	1	1	16.126			14.8312	15.5789	15.2021	15.4133	15.2783	15.5301
P00329	Alcohol dehydrogenase 1	20	20	30.7976	30.7706	30.8966	29.5921	29.8205	29.7684	31.2545	31.2585	31.2531
P28474	Alcohol dehydrogenase class-3	12	12	28.652	28.4709	28.2869	27.0209	26.94	27.1992	28.1593	28.1498	27.9686
Q9JHW9	Aldehyde dehydrogenase family 1 member A3	8	5	21.2539	21.7008	22.3033	22.9304	23.0188	22.8335	22.2357	21.6806	22.039
P47740	Aldehyde dehydrogenase family 3 member A2	14	14	26.5229	26.5743	26.6023	25.064	25.0744	25.3475	25.9608	25.799	25.5386
Q9CZS1	Aldehyde dehydrogenase X, mitochondrial	7	5	21.6257	21.3346	21.6438	21.1756	21.5866	21.394	20.5352	20.098	20.6393
O35945	Aldehyde dehydrogenase, cytosolic 1	24	14	25.4826	25.3017	25.5522	25.4198	25.8052	25.3769	26.3036	26.3001	26.2843
P47738	Aldehyde dehydrogenase, mitochondrial	12	10	23.436	23.6218	23.7116	22.0974	21.563	22.0395	20.6394		20.6349
Q9JLI0	Aldo-keto reductase a	7	3	22.2628	23.2737	22.7241	21.7615	21.7599	21.1434	22.4704	21.9303	23.3589
Q9JII6	Aldo-keto reductase family 1 member A1	8	8	24.3911	24.2037	24.2729	20.8216	20.9086	20.5015		20.4943	21.6778
P45376	Aldo-keto reductase family 1 member B1	7	6	22.0698	23.8806	21.7621	22.2708	22.4199	21.6474	19.967	19.7919	19.6854
Q8VC28	Aldo-keto reductase family 1 member C13	8	4	24.0676	24.0991	24.2309	22.8055	23.0412	22.8685	23.0389	23.8083	23.5018
Q8VCX1	Aldo-keto reductase family 1 member D1	3	1
Q9CZU0	Aldo-keto reductase family 1, member C20	6	1	19.5819	19.6857	18.5414				20.7108	20.7537	20.3797
P45377	Aldose reductase-related protein 2	7	6	23.7109	23.7074	23.7493	23.5974	23.2867	23.634	20.8205	20.4099	21.8025
A2AL50	Alkylglycerone-phosphate synthase	1	1	17.7254
Q64FW2	All-trans-retinol 13,14-reductase	5	5	22.1482	21.8038	22.0971	21.1043	22.1191	21.8821	22.6855	22.944	22.921
Q9QYY9	All-trans-retinol dehydrogenase [NAD(+)] ADH4	11	11	25.0729	24.5471	24.9115	23.8708	23.7785	23.7787	25.8059	25.9365	25.9365
Q91VB8	Alpha globin 1	13	1
Q9WTS2	Alpha-(1,6)-fucosyltransferase	1	1
A0A0A0MQA3	Alpha-1-antitrypsin 1-1	11	6	24.8769	25.1749	25.2184	23.7105	24.5684	24.2309	25.2191	25.2923	25.3229
P22599	Alpha-1-antitrypsin 1-2	12	7	27.6498	27.4939	27.4959	25.9278	26.0263	26.1014	27.523	27.6062	27.5603
A2AKD7	Alpha-1-syntrophin	1	1
Q6NXK9	alpha-1,2-Mannosidase	1	1	19.3828	19.5537	19.0087	17.4273	18.2783	17.6454	19.2831	19.2049	19.2085
P27808	Alpha-1,3-mannosyl-glycoprotein 2-beta-N-acetylglucosaminyltransferase	1	1
Q8R4G6	Alpha-1,6-mannosylglycoprotein 6-beta-N-acetylglucosaminyltransferase A	5	5	21.5738	21.5711	21.1821	21.7897	21.0173	20.9841	20.6793	21.575	20.4081
Q61247	Alpha-2-antiplasmin	13	13	27.0644	27.0519	27.0363	27.3454	27.5832	27.4933	27.1953	27.2508	27.3248
P29699	Alpha-2-HS-glycoprotein	10	10	27.1238	27.2143	27.1013	27.3299	27.5848	27.4034	26.6296	27.3212	26.8225
P55302	Alpha-2-macroglobulin receptor-associated protein	7	7	23.6352	23.7031	23.4514	22.1386	22.303	22.1184	22.9019	22.9168	22.836
Q6GQT1	Alpha-2-macroglobulin-P	4	2	24.3447	23.9221	24.5083	24.587	24.5776	24.1763	24.2291	24.4356	24.4598
P57780	Alpha-actinin-4	4	4	20.0027	20.074	19.6735	18.6515	17.8542	17.5698	18.0463	19.3962	19.2504
Q9QYC0	Alpha-adducin	18	17	24.5378	24.4546	24.3672	23.1375	23.0127	22.9372	24.7803	24.6905	24.6172
Q99K67	Alpha-aminoadipic semialdehyde synthase, mitochondrial	2	2	20.6052	19.9067	20.4483		20.2672			20.7211	21.1955
O88327	Alpha-catulin	2	2	25.24	25.1193	25.0221	23.1418	23.9804	23.8863	21.4439	20.9815	20.9475
P61164	Alpha-centractin	7	7	23.5144	23.2623	23.9237	25.4907	25.6281	25.7913	24.8675	25.0646	25.1728
P23927	Alpha-crystallin B chain	7	7	27.3347	27.3428	27.2813	24.9214	25.0298	24.9612	24.9298	24.74	24.9098
P60840	Alpha-endosulfine	2	1
P17182	Alpha-enolase	27	13	30.6293	30.5621	30.5918	30.2413	30.2106	30.259	30.2848	30.302	30.3027
P27046	Alpha-mannosidase 2	3	3	20.0887	20.8893	20.7608	15.3635		15.5115		21.5579
Q8BRK9	Alpha-mannosidase 2x	1	1	17.7562	19.0297	18.7084	17.731	18.6519	18.5088	19.4453
O09174	Alpha-methylacyl-CoA racemase	4	4	21.7866	21.2671	22.2282	19.4023	21.6741	21.7791		20.1573
Q9EPC1	Alpha-parvin	11	10	25.5778	25.4468	25.613	24.8745	25.1638	25.0111	25.3846	25.7151	25.6091
Q6PAM1	Alpha-taxilin	2	2	19.2811	19.3606	18.3432	17.2956	17.6226	16.8302	18.9737	19.0847	18.8965
A2AIT6	Alpha-tocopherol transfer protein	1	1
Q8CIH9	Amidophosphoribosyltransferase	2	2	20.0379	19.7437	19.4224				20.1105	20.141	19.727
Q8BW75	Amine oxidase	12	12	24.9265	24.9971	25.056	23.873	24.1184	23.8395	24.9527	24.0207	24.1457
B1ARV3	Amine oxidase [flavin-containing] B	1	1
Q9ESU7	Amino acid transporter	1	1
P31230	Aminoacyl tRNA synthase complex-interacting multifunctional protein 1	13	13	26.0558	26.0697	26.0138	25.7777	25.4584	25.4896	26.0476	26.8001	25.9703
Q8R3V2	Aminoacyl tRNA synthase complex-interacting multifunctional protein 2	4	4	23.3715	23.3599	23.1663	21.9668	22.1609	21.5225	23.6958	23.697	23.6286
Q8CFA2	Aminomethyltransferase, mitochondrial	2	2	20.4828		20.2435	20.0455			21.4148		21.3283
E9PYF1	Aminopeptidase	1	1
P97449	Aminopeptidase B	5	5	21.5442	20.48				19.6252
E9QJR0	Aminopeptidase N	3	3	22.5611	24.5672	23.5916	14.8994	20.9006	19.3519		13.5393	14.0089
Q3V1D3	AMP deaminase	20	17	25.5897	25.2829	24.8853	26.8687	24.4905	24.471	27.3976	27.196	27.3145
O08739	AMP deaminase 1	16	13	23.5979	23.5472	23.8572	22.4089	23.1236	22.7643	23.0508	22.9773	23.0622
A2AE27	AMP deaminase 3	2	2
Q8R5A3	Amyloid beta A4 precursor protein-binding family B member 1-interacting protein	7	6	21.7415	22.004	22.018	21.5822	21.5003	21.8278	23.4699	23.6548	23.5934
A0A2I3BQZ9	Amyloid-beta A4 protein	2	2	19.3049	18.446	18.799		19.1232	19.5453
Q9DCH6	AN1-type zinc finger protein 6	3	3	18.3321	20.8069	18.6947		18.1837		19.603	20.5646	19.5949
Q8WTY4	Anamorsin	1	1
J3QN89	Angio-associated migratory protein	1	1
P21570	Angiogenin	2	2	18.5497	18.0368	17.9008	19.2279	18.7415	18.569	20.0732	20.0435	20.0271
Q3TMQ6	Angiogenin-4	2	2	22.5121	22.4987	22.305	21.6584	21.214	21.6257			21.7348
O08538	Angiopoietin-1	1	1
Q9R182	Angiopoietin-related protein 3	12	12	26.234	26.0898	26.6237	26.4464	26.8497	26.8889	27.205	27.3022	27.243
P11859	Angiotensinogen	4	4	23.922	23.8475	23.9515	22.4757	22.4049	22.0642	23.4943	23.8485	23.8466
Q8BLU6	Ankyrin repeat and EF-hand domain-containing protein 1 (Fragment)	1	1
Q80UP5	Ankyrin repeat domain-containing protein 13A	1	1	16.6049	17.237	16.2862					16.3356
A0A494B9J0	Ankyrin repeat domain-containing protein 2	7	7	24.2288	24.6159	24.2061	23.1294	23.186	23.0881	24.1266	24.0373	23.929
Q02357	Ankyrin-1	25	25	24.4803	24.4955	24.5028	25.6118	25.1672	25.0606	25.4863	25.4193	25.623
A0A087WNU5	Ankyrin-3 (Fragment)	1	1	19.947	19.2613	19.4141	20.7019		20.7465		21.023
P10107	Annexin A1	21	21	27.6763	27.5568	27.4531	26.8213	27.0644	26.8619	27.7378	28.0134	27.8151
P97384	Annexin A11	3	3	20.1991	20.4857	19.9266				22.32	22.2864	22.0999
P07356	Annexin A2	28	28	30.8277	30.7697	30.7578	29.9661	29.9474	30.0044	30.0247	29.9887	29.976
Q07076	Annexin A7	2	2	15.8198	18.7491	17.7152			15.9387
Q8BHY3	Anoctamin-1	7	7	26.3101	26.1708	25.8782	26.5032	26.2899	26.0615	26.7481	26.54	26.5369
Q6P9J9	Anoctamin-6	4	4	20.9275	20.9153	20.4238		16.5139	19.4464	20.7003	20.2336	20.3724
Q9CZ52	Anthrax toxin receptor 1	2	2
Q6DFX2	Anthrax toxin receptor 2	9	9	24.5157	24.4811	24.5595	24.2885	24.3967	23.9374	24.7938	24.4708	25.094
E9Q748	Antileukoproteinase	1	1	21.2828	21.5563	21.5172
P32261	Antithrombin-III	17	17	27.871	28.3037	28.0039	27.4212	31.037	27.763	28.9253	28.948	28.9279
Q6Q899	Antiviral innate immune response receptor RIG-I	31	31	26.2859	26.083	26.4079	26.0101	26.0638	26.0876	26.5245	26.7232	26.6749
O35643	AP-1 complex subunit beta-1	30	19	28.3549	28.3996	28.2149	27.4484	27.8753	27.8306	28.4654	28.3869	28.3269
Q8CBB7	AP-1 complex subunit gamma	4	4	22.1635	21.6143	22.2123	20.4848	19.9892	20.0651	21.8053	22.2127	22.4971
O88512	AP-1 complex subunit gamma-like 2	1	1
P35585	AP-1 complex subunit mu-1	12	12	23.4398	23.9717	23.1867	20.0055	21.2912	21.7245	23.8914	23.7969	23.4712
D3YXN0	AP-1 complex subunit sigma-1A (Fragment)	1	1
P17426	AP-2 complex subunit alpha-1	6	3	20.6251	18.7874	17.8863	17.5438	17.6776	17.5471	22.2453	22.1997	22.2265
P17427	AP-2 complex subunit alpha-2	23	20	26.5168	26.2186	26.5181	25.9033	25.9904	25.7701	26.671	26.6266	27.1717
Q9DBG3	AP-2 complex subunit beta	21	10	26.2351	26.2877	25.9481	26.7133	26.7594	26.6715	26.9989	27.1108	26.9839
P84091	AP-2 complex subunit mu	11	11	26.1779	26.2483	26.1375	27.3071	27.2249	27.2811	27.3207	27.2732	27.2678
P62743	AP-2 complex subunit sigma	4	4	23.1576	23.1658	23.2835	22.4417	22.5087	21.4818	24.0866	24.2925	24.3637
Q9Z1T1	AP-3 complex subunit beta-1	7	7	22.752	22.9449	22.9013	22.2483	22.3257	22.4537	24.1859	23.8378	24.1059
O54774	AP-3 complex subunit delta-1	9	9	22.6597	22.0541	22.3922	20.9947	21.9908	22.1056	20.1385	19.2119	20.9306
Q9JKC8	AP-3 complex subunit mu-1	4	4	20.2376	20.2082		17.6572		18.2254	20.9314	21.0868	21.0055
Q5YD48	APOBEC1 complementation factor	1	1	19.1908	18.6409		21.3215	20.6417	21.1261	20.7745	20.8606	20.6467
Q00623	Apolipoprotein A-I	36	36	33.7778	33.8045	33.6553	34.4061	34.4022	34.484	34.2231	34.1688	34.1851
P09813	Apolipoprotein A-II	3	3	23.5188	23.2141	23.0492	28.2415	28.5093	28.4519	29.9766	30.0143	30.0406
P06728	Apolipoprotein A-IV	29	29	30.6766	30.7127	30.7306	32.1912	32.2118	32.1799	31.6225	31.5924	31.5636
Q8C7G5	Apolipoprotein A-V	8	8	25.9351	25.4768	25.6658	25.9798	25.9072	26.1954	25.9753	26.0233	25.9863
E9Q414	Apolipoprotein B-100	222	222	33.09	33.1711	33.0607	33.6732	33.7171	33.73	33.628	33.6278	33.6085
P34928	Apolipoprotein C-I	5	5	28.3438	28.195	28.2596	28.4784	28.4837	28.5671	29.6809	29.5977	29.5708
E9QP56	Apolipoprotein C-III	1	1			20.5632		21.3779		23.9437	24.3551	24.827
Q61268	Apolipoprotein C-IV	1	1
P51910	Apolipoprotein D	2	2		20.5041		20.4752	20.575	20.9117
P08226	Apolipoprotein E	37	37	32.9389	32.9178	32.8943	33.2122	33.1448	33.1128	33.488	33.4447	33.5077
A0A0R4J0M4	Apolipoprotein F	1	1				18.1419	18.4539	18.583	17.4471	17.8546	17.8822
E9PZG0	Apolipoprotein L 11a	5	5	22.3032	22.1888	21.9896	23.3418	23.0208	23.0681	22.7992	22.6362	22.4198
Q8C7I4	Apolipoprotein L 9b	4	4	23.1922	22.4966	23.0668	21.3279	21.7017	22.2114	21.263	21.3063	21.8835
Q9Z1R3	Apolipoprotein M	4	4	24.5082	24.3209	24.4949	25.695	25.6312	25.1646	25.0703	24.7969	25.0724
G3X9D6	Apolipoprotein N	4	4	25.2158	24.969	25.408	24.2743	23.8689	24.3732	25.813	25.9965	26.0152
O35841	Apoptosis inhibitor 5	10	10	24.2603	24.2496	24.302	23.4393	23.3842	23.3936	24.4907	24.6654	24.6957
Q9Z0X1	Apoptosis-inducing factor 1, mitochondrial	11	11	24.9037	24.7971	24.4936	22.8902	21.9917	23.9233	22.9352	23.5623	23.3667
Q8CG79	Apoptosis-stimulating of p53 protein 2	1	1	16.268	16.338	15.7145	14.1567	15.5412		16.6247	16.8329	16.4075
Q02013	Aquaporin-1	3	3	23.4612	23.6042	23.8105	24.062	24.0629	24.2733	20.9148	20.5246	20.6872
O70582	Arachidonate 12-lipoxygenase, 12R-type	2	2	24.2948	24.481	24.7045	23.9186	24.1693	23.8938	24.1133	25.0735	25.0601
Q68FF6	ARF GTPase-activating protein GIT1	2	2		16.0735	15.8814		15.5541	14.7832	16.481	16.8044	16.5151
E9PVA6	ARF GTPase-activating protein GIT2	2	2	18.6875	18.1293	18.3248	17.8487	17.9434	17.378	18.9311	18.0282
A0A087WNV1	Arf-GAP domain and FG repeat-containing protein 1	2	2	19.1339	19.434					19.1633	19.9018	19.9458
A0A338P6P6	Arf-GAP with coiled-coil, ANK repeat and PH domain-containing protein 2	2	2		19.7227	19.196
E9QMJ1	Arf-GAP with SH3 domain, ANK repeat and PH domain-containing protein 1	6	6	18.3	18.1516	18.2548	17.4058	16.7591	17.4292	19.5263	19.208	19.154
Q7SIG6	Arf-GAP with SH3 domain, ANK repeat and PH domain-containing protein 2	1	1	29.3997	29.1587	29.2446	29.403	29.3175	29.5369	29.8895	29.5153	29.3549
Q61176	Arginase-1	17	17	27.9958	27.8069	28.1523	27.4687	27.5761	27.5422	28.6037	28.6303	28.5304
A0A140LIS5	Arginine and glutamate-rich protein 1 (Fragment)	1	1	21.2231	21.0937	20.7776	18.6416	19.8145	20.1265
Q9D0I9	Arginine--tRNA ligase, cytoplasmic	28	28	26.2265	26.3316	26.3615	26.0824	26.0722	25.8665	26.8032	27.0216	26.9057
Q91YI0	Argininosuccinate lyase	12	12	25.9119	25.8842	25.7882	24.738	24.5163	24.529	24.8243	24.9729	24.9595
P16460	Argininosuccinate synthase	28	28	30.4414	30.4018	30.3755	29.6796	29.6124	29.6861	31.4998	31.4738	31.3688
Q9Z2A5	Arginyl-tRNA--protein transferase 1	3	3	20.2541	20.2568	19.8116	18.3964	18.2432	18.3393	19.843	19.3172	19.9912
P98203	Armadillo repeat protein deleted in velo-cardio-facial syndrome homolog	1	1	20.9637	21.0027	20.7751	21.308	21.9629	21.9748	21.9118	21.7428	21.8886
Q9D0L7	Armadillo repeat-containing protein 10	1	1	18.2971	18.073	17.963		16.9992	16.1057	14.7453
Q8BNU0	Armadillo repeat-containing protein 6	1	1
Q80ZP8	Armet protein	9	9	26.8429	26.8282	26.7507	26.126	26.2078	26.1398	26.461	26.5731	26.484
Q99KN1	Arrestin domain-containing protein 1	1	1	18.7585	18.4101	18.1146	18.8503	18.197	17.6864
Q5F2D9	Arrestin, beta 2	1	1
Q99PG0	Arylacetamide deacetylase	7	7	23.5275	23.6387	23.7288	23.5105	23.1597	23.3992	24.6465	24.6321	24.6097
P50295	Arylamine N-acetyltransferase 2	3	3
P34927	Asialoglycoprotein receptor 1	2	2		21.6347	20.8682
Q61024	Asparagine synthetase [glutamine-hydrolyzing]	1	1	19.1435	18.9239	19.7074
Q8BFS9	Asparagine synthetase domain-containing protein 1	1	1	25.157	25.2032	24.8643	25.7446	25.6333	25.4719	25.7434	25.5581	25.5697
Q8BP47	Asparagine--tRNA ligase, cytoplasmic	16	16	26.5078	26.4336	26.4193	26.0173	26.3292	26.4615	26.9049	27.0113	27.0207
P05201	Aspartate aminotransferase, cytoplasmic	3	3
P05202	Aspartate aminotransferase, mitochondrial	22	22	28.5947	28.6025	28.5725	26.038	26.4625	26.4787	25.4725	25.4439	25.4833
Q922B2	Aspartate--tRNA ligase, cytoplasmic	32	32	25.9322	25.9892	25.9261	25.9205	26.1801	26.2019	27.0489	27.1046	26.9191
Q8BPW9	Aspartyl aminopeptidase	9	9	24.2166	24.4334	24.2649	24.3501	24.3574	24.3095	23.7636	23.54	23.5427
Q8BSY0	Aspartyl/asparaginyl beta-hydroxylase	7	7	23.6285	23.5025	23.4177	21.4194	20.9222	21.418	23.1053	21.6033	21.8454
Q99MQ4	Asporin	8	8	25.1009	25.0815	25.1749	25.5878	24.7271	24.8063	25.1246	25.7364	25.3753
Q7TQH0	Ataxin-2-like protein	5	5	19.9271	19.9907	20.2938				18.9561	18.6472	19.2193
E9QND8	Atlastin-2	1	1	18.3301	18.4167	18.0567		17.7861	17.1026	18.8291	18.4643	18.2616
Q91YH5	Atlastin-3	14	14	25.1656	25.373	25.2797	24.9424	25.5137	25.3621	25.2499	25.2455	25.2261
Q9CQQ7	ATP synthase F(0) complex subunit B1, mitochondrial	8	8	26.0781	26.0379	25.8535	25.0394	25.3565	24.1885	25.4901	24.515	24.322
E9PV44	ATP synthase F1 subunit epsilon	3	3	24.0706	24.1229	23.8123	24.2973	24.169	24.2253	24.4047	24.2692	24.2053
A0A1Y7VLP0	ATP synthase membrane subunit 6.8PL (Fragment)	2	2		22.1898
Q78IK2	ATP synthase membrane subunit K, mitochondrial	3	3	22.9869	22.847	23.2352				20.8373	21.1432	20.9535
P03930	ATP synthase protein 8	3	3	24.6974	24.7361	24.8246	21.8486	22.6071	22.1113	21.3258	21.3331	21.3159
Q03265	ATP synthase subunit	20	20	29.0372	29.2555	29.1147	27.3874	27.5576	27.4019	27.8782	27.9902	28.0292
P56480	ATP synthase subunit alpha, mitochondrial	7	7	23.9639	23.9354	23.7325	22.2461	19.8831	22.0776		22.0043	21.2433
Q9DCX2	ATP synthase subunit beta, mitochondrial	7	7	24.5475	24.4172	24.3928	22.8699	21.8098	22.3879	21.0592	22.1815	22.0102
Q06185	ATP synthase subunit d, mitochondrial	3	3	24.9049	24.7744	25.034	24.4116	24.6599	24.5017	25.1747	25.1438	25.0579
P56382	ATP synthase subunit e, mitochondrial	1	1	21.5	21.2114	21.1763						19.9467
P56135	ATP synthase subunit epsilon, mitochondrial	3	3	22.3911	22.1584	22.4058
Q9CPQ8	ATP synthase subunit f, mitochondrial	2	2	22.3568	22.0429	22.1422		20.4404			21.0854
Q91VR2	ATP synthase subunit g, mitochondrial	5	5	25.4614	25.4057	25.4408	24.6332	24.6254	24.4931	27.262	26.8439	27.5002
Q9DB20	ATP synthase subunit gamma, mitochondrial	6	6	24.5557	24.2744	24.7615	20.6161	21.0642	20.9569	21.59	22.7649	22.3395
P61222	ATP-binding cassette sub-family E member 1	18	18	24.2492	24.3094	24.3003	23.8476	23.6962	24.0112	24.9731	25.2359	25.1169
Q6P542	ATP-binding cassette sub-family F member 1	8	8	22.6778	23.1368	22.7	22.3899	21.508	21.6875	24.0835	23.9278	23.6381
Q99LE6	ATP-binding cassette sub-family F member 2	8	8	25.3484	24.98	25.0226	24.4419	24.5936	24.5306	24.2114	24.5432	24.4134
Q8K268	ATP-binding cassette sub-family F member 3	1	1
Q91V92	ATP-citrate synthase	35	35	27.3247	27.1557	27.2404	25.9828	25.7738	25.6485	29.5784	29.6389	29.5082
Q9CZ42	ATP-dependent (S)-NAD(P)H-hydrate dehydratase	4	4	24.0853	23.6453	23.8644	23.6365	23.6656	23.4409	21.7409	21.1685	20.9877
Q8C605	ATP-dependent 6-phosphofructokinase	18	15	24.8636	24.8239	24.7568	24.0908	24.4744	24.1667	25.016	24.9786	25.1286
P12382	ATP-dependent 6-phosphofructokinase, liver type	19	14	24.956	24.7397	24.6593	24.4222	24.0533	24.3555	24.8584	25.3087	25.0341
P47857	ATP-dependent 6-phosphofructokinase, muscle type	33	28	29.1092	29.2324	29.2796	28.7863	28.8387	28.8219	29.8345	29.939	29.987
O88696	ATP-dependent Clp protease proteolytic subunit, mitochondrial	2	2	20.4473	20.1235	20.1494				18.5955	18.6531
Q8VHK9	ATP-dependent DNA/RNA helicase DHX36	3	3	26.6418	26.4694	26.1828		21.5012			21.4364	21.4723
O70133	ATP-dependent RNA helicase A	15	15	25.3809	25.8277	25.2552	24.0358	23.5321	23.8577	23.8107	23.896	24.264
Q91VR5	ATP-dependent RNA helicase DDX1	31	31	25.6366	25.6279	25.7858	25.5209	25.6446	25.4925	26.2537	26.5316	26.4604
Q61655	ATP-dependent RNA helicase DDX19A	14	14	24.8551	24.571	24.8059	25.2254	25.2826	25.3249	25.6406	25.4858	25.4481
Q8VDW0	ATP-dependent RNA helicase DDX39A	7	1	20.0423	19.9291	19.5067				20.4572	20.5327	20.6588
Q62167	ATP-dependent RNA helicase DDX3X	16	15	26.091	26.1891	25.8738	25.8708	25.6993	25.6722	25.9237	25.9515	25.8236
Q810A7	ATP-dependent RNA helicase DDX42	1	1	17.95	17.9584	17.8955	17.4207	17.7631	17.6549	19.0359	18.9125	18.9996
Q99MJ9	ATP-dependent RNA helicase DDX50	1	1						20.7337
Q6PGC1	ATP-dependent RNA helicase DHX29	2	2	17.9302	18.5368	17.8077		17.2652	19.3726	19.7417	19.2029	19.8022
Q9QUI6	Atypical chemokine receptor 1	2	2				21.499	21.13	21.2374	20.0691	20.675
Q60936	Atypical kinase COQ8A, mitochondrial	3	3	22.772	22.5394	22.6882	23.2371	23.1485	23.295	23.281	22.4038	23.1735
Q99J83	Autophagy protein 5	2	2	22.1245	21.3518	22.7079	24.2734	24.2345	24.1763	24.225	24.4304	24.0457
Q8C0J2	Autophagy-related protein 16-1	2	2	19.9984	20.2861	19.5913	17.9299	18.2481	18.5029	20.3198	20.9695	20.1
Q8C4Q6	Axin interactor, dorsalization-associated protein	5	5		18.2216		20.19	20.9052	20.7568	21.6444	21.4693	21.8091
Q61334	B-cell receptor-associated protein 29	1	1	19.7775	19.2714	19.5547				19.453
Q61335	B-cell receptor-associated protein 31	5	5	25.3768	25.4146	25.1369	23.9071	24.0257	23.8211	24.8561	24.5524	24.3573
P25918	B-lymphocyte antigen CD19	1	1
P19437	B-lymphocyte antigen CD20	5	5	22.6623	22.5703	22.5779	21.8567	21.72	21.7548	20.9759		20.827
O88738	Baculoviral IAP repeat-containing protein 6	2	2		20.9088	21.7928	21.6776	21.5973	21.4651	21.3911	21.4086	21.4636
Q9JLV1	BAG family molecular chaperone regulator 3	4	4	21.9758	22.3464	22.0883	21.4203	21.6227	21.8996	22.7764	22.459	22.3884
Q8CI32	BAG family molecular chaperone regulator 5	5	5
P04919	Band 3 anion transport protein	24	24	28.294	28.2039	27.6943	29.8323	29.773	29.75	27.9033	27.8611	27.8323
O70318	Band 4.1-like protein 2	14	13	23.6292	23.645	22.8466	22.4457	22.248	20.9859	22.6884	22.9938	22.0286
Q9WV92	Band 4.1-like protein 3	6	4	27.2413	27.21	27.0186	28.3919	28.1059	28.4325	27.9466	27.7904	27.6256
P52963	Band 4.1-like protein 4A	1	1
O54962	Barrier-to-autointegration factor	3	3	23.6664	23.2237	23.3894	23.1178	22.721	22.9947	23.8035	23.6141	23.6892
Q9R069	Basal cell adhesion molecule	6	6	23.0576	22.4834	23.1182	23.1855	23.2999	23.0999	21.1037	22.8408	22.8869
B1B0C7	Basement membrane-specific heparan sulfate proteoglycan core protein	8	8	23.5944	23.3676	23.4627	23.7267	23.7806	23.67	24.2408	24.0424	24.0084
Q9CQC6	Basic leucine zipper and W2 domain-containing protein 1	13	12	26.3059	26.26	26.5073	25.7098	25.7619	25.6397	26.5583	26.653	26.5663
Q91VK1	Basic leucine zipper and W2 domain-containing protein 2	6	5	19.92	20.0465	19.8334	20.0997		20.072	20.5957	20.8268	20.4172
P18572	Basigin	6	6	25.9422	25.8933	25.9044	25.4561	25.2676	25.4473	25.2277	25.1229	24.8749
E0CXR0	Bax inhibitor 1 (Fragment)	2	2	21.4741	22.2374	22.0092	21.2635	21.2848	20.9187	23.3421	23.197	23.2784
Q8CCN5	BCAS3 microtubule associated cell migration factor	2	2	17.9395	17.5611	18.5979	17.3768	17.1136		18.0783	18.7811	18.1589
Q8K019	Bcl-2-associated transcription factor 1	3	3	19.8514	20.0142	19.4577		16.7651		20.0665	19.6857	18.4808
P59017	Bcl-2-like protein 13	1	1
A0A1B0GX81	BCL2-associated athanogene 6 (Fragment)	3	3	20.0913	19.8563	19.7348
P15535	Beta-1,4-galactosyltransferase 1	1	1	20.3717	20.4828	20.0525	20.3215	20.3051	20.293	18.9404	17.7723	18.9663
Q01339	Beta-2-glycoprotein 1	24	24	30.4643	30.4885	30.4462	31.6781	31.7795	31.7174	30.8858	30.8604	30.7887
P01887	Beta-2-microglobulin	3	3	24.9855	24.8138	24.5251	24.7854	24.7555	25.1077	24.5384	24.6726	24.594
B7ZNU9	Beta-2-syntrophin	6	6	25.5647	25.5769	25.4753	22.9361	23.0819	23.1798	23.4495	23.0351	23.3679
Q9QYB8	Beta-adducin	11	10	25.438	25.4382	25.3577	26.2576	26.4921	26.5396	25.9447	25.2482	25.3081
Q99MK8	Beta-adrenergic receptor kinase 1	4	4	17.9465	18.5699	16.033	18.3265	15.8584	15.2179	19.7077	19.2652	17.1499
Q8BWG8	Beta-arrestin-1	5	5	24.829	24.8537	24.6702	24.139	23.9458	23.4819	23.8281	24.0483	23.6343
Q9CWL8	Beta-catenin-like protein 1	3	3	17.9756	17.7199	18.0511	17.3042	16.3177	16.4502	18.7183	18.7356	17.5579
P21550	Beta-enolase	25	15	30.8646	31.0659	30.807	30.7727	30.7929	30.7379	30.7191	30.7079	30.6702
P20060	Beta-hexosaminidase subunit beta	1	1				19.1013	19.6076	19.756	20.359
Q9ES46	Beta-parvin	9	8	24.0333	22.5709	22.849	24.0879	21.9178	21.821	23.2419	23.3828	23.2931
O35490	Betaine--homocysteine S-methyltransferase 1	25	20	30.8379	30.826	30.7425	30.2894	30.5085	30.4323	31.0935	31.034	31.093
Q60967	Bifunctional 3'-phosphoadenosine 5'-phosphosulfate synthase 1	7	6	23.4888	22.7069	23.4731	21.4172	21.787	21.8655	22.807	22.9939	22.7399
Q9DBL7	Bifunctional coenzyme A synthase	5	5	24.6475	24.7426	24.4097	24.9849	24.7711	24.8979	24.462	24.635	24.4766
P34914	Bifunctional epoxide hydrolase 2	10	10	24.3135	24.281	24.2967	23.6513	23.9542	23.7031	23.8113	23.5103	23.8937
Q8CGC7	Bifunctional glutamate/proline--tRNA ligase	51	51	27.3056	27.1055	27.1258	29.3058	29.4693	29.0951	28.1237	28.1378	28.006
Q9JLV6	Bifunctional polynucleotide phosphatase/kinase	7	7	24.1602	24.0303	24.7531	23.8863	23.8838	23.7823	22.0596	21.3714	22.1581
Q9CWJ9	Bifunctional purine biosynthesis protein ATIC	16	16	25.0657	24.6296	25.0899	24.8048	24.818	24.7693	24.5368	24.7527	24.6839
Q91WG8	Bifunctional UDP-N-acetylglucosamine 2-epimerase/N-acetylmannosamine kinase	18	18	23.9131	24.2297	23.9328	23.9784	23.8197	23.6534	25.4007	25.6836	25.7056
Q4LDG0	Bile acyl-CoA synthetase	13	13	24.0373	24.118	24.135	24.019	24.1471	24.1775	25.3546	25.2985	24.9306
P50236	Bile salt sulfotransferase 2	13	5	26.8597	26.9895	27.1333	26.3183	26.4774	26.3941	27.6515	27.4486	27.4869
Q64285	Bile salt-activated lipase	11	11	25.943	26.0607	25.6752	22.551	23.0167	23.2314	24.4055	24.622	24.7395
Q9CY64	Biliverdin reductase A	11	11	24.9592	24.9143	24.944	24.8601	24.7395	24.911	24.9298	25.1972	24.9634
Q6P1B9	Bin1 protein	11	10	25.1419	25.4371	25.2741	24.6733	24.3033	25.1199	24.9837	25.2608	25.0902
P15327	Bisphosphoglycerate mutase	10	10	26.133	26.1947	26.0279	26.0493	25.9846	25.9206	26.5257	26.4251	26.4596
A0A286YCQ2	BK channel (Fragment)	1	1	22.3234	22.3794	21.9297	20.774	20.9532	21.0949	21.8783	21.9912	21.9062
Q8R016	Bleomycin hydrolase	6	6	25.7189	25.5796	25.559	24.8585	25.1732	25.0571	25.388	25.3592	25.3037
P98063	Bone morphogenetic protein 1	5	5	20.4889	17.6204		18.4149	18.4286	20.6916	21.6127	19.7459	21.6571
A0A0R4J038	Bradykinin	29	26	31.1068	31.2131	31.1501	31.6805	31.6241	31.535	32.0287	31.9691	31.8826
Q91XV3	Brain acid soluble protein 1	8	8	25.0043	25.0584	24.5085	23.2065	23.1707	22.7389	23.9302	23.9029	24.0309
B1AZ46	Brain-specific angiogenesis inhibitor 1-associated protein 2	2	2	19.2053	20.5082	20.7593			20.1032	19.9512	20.0983	19.5939
Q9DBJ3	Brain-specific angiogenesis inhibitor 1-associated protein 2-like protein 1	3	3	21.2234	19.8341	21.0008				20.979	20.8611	20.4937
A0A1B0GX27	Branched-chain-amino-acid aminotransferase	5	5	23.4996	23.6339	23.6668	21.6326			21.8306		22.8541
Q99MP8	BRCA1-associated protein	3	3							16.0306	16.5187
Q6PAJ1	Breakpoint cluster region protein	4	3	17.6963	17.1245	17.2548		15.094				15.8234
P97929	Breast cancer type 2 susceptibility protein homolog	1	1	22.0208	21.8799	22.1906	23.5166	23.7056	23.8008	22.5743	22.6802	22.6243
G3X9K3	Brefeldin A-inhibited guanine nucleotide-exchange protein 1	2	1
A2A5R2	Brefeldin A-inhibited guanine nucleotide-exchange protein 2	5	4	24.0667	23.6773	24.1288	23.6012	23.8116	23.67	23.3089	23.6015	23.4755
Q8BXV2	BRI3-binding protein	1	1	20.0713	19.9476	19.8649
D3Z6Q9	Bridging integrator 2	11	10	23.6832	23.5807	23.5072	23.0129	23.8563	24.2294	23.8531	23.9384	24.141
D3Z4D8	BRISC complex subunit Abraxas 2 (Fragment)	2	2	21.2802	21.5003	21.2585	20.7833	20.7158	20.6778	21.8045	21.6006	21.6463
A0A0R4J175	Bromodomain-containing protein 9	1	1	25.2196	25.2557	25.2634	25.2272	25.1132	25.0592	25.513	25.4179	25.1529
Q922M3	BTB/POZ domain-containing adapter for CUL3-mediated RhoA degradation protein 3	2	2	15.6828	16.3481	16.1899
Q9JMD0	BUB3-interacting and GLEBS motif-containing protein ZNF207	2	2
Q922D8	C	47	47	28.7721	28.7773	28.8687	28.3489	28.3292	28.2587	29.5015	29.4242	29.3825
P86792	C-1-tetrahydrofolate synthase, cytoplasmic	1	1
Q9Z121	C-C motif chemokine 21b	5	5	24.5019	24.1782	24.5222	25.4064	25.3841	25.4063	26.115	25.8725	25.8607
Q58A65	C-C motif chemokine 8	5	5	24.0669	24.0041	23.4898	23.8701	23.7733	23.4331	23.9949	23.8206	23.7844
Q9EQS3	C-Jun-amino-terminal kinase-interacting protein 4	1	1	22.1972	22.7265	21.8559	22.5027	22.4463	22.1111	22.6979	22.2965	22.6553
P14847	c-Myc-binding protein	8	8	25.7707	25.8603	25.6519	26.4085	26.4535	26.5442	25.6232	25.3378	25.4939
A0A0J9YTW3	C-reactive protein	1	1	20.3538	20.8322	20.6327			18.7705
Q9EPW4	C-terminal-binding protein 1 (Fragment)	1	1		15.893
Q8CFZ6	C-type lectin domain family 3 member A	10	10	30.108	30.0358	29.8517	29.6865	29.8986	29.7555	29.9575	29.8612	29.8918
P70194	C-type lectin domain family 3, member b	1	1
P10889	C-type lectin domain family 4 member F	1	1	22.6521	22.6785	22.9186	22.0581	21.9297	21.9309	23.2271	23.4889	23.6026
P50228	C-X-C motif chemokine 2	1	1
B8JJN0	C-X-C motif chemokine 5	60	32	32.0292	32.0301	31.9953	32.9742	32.889	32.927	32.3578	32.2506	32.2135
P08607	C3/C5 convertase	12	12	27.7288	27.7569	27.6193	28.5176	28.5759	28.519	27.4645	27.387	27.3623
P30993	C4b-binding protein	1	1	19.3392	19.1744	18.9201	19.1019	19.5842	19.4625
P09803	C5a anaphylatoxin chemotactic receptor 1	5	5	24.5813	24.5196	24.2732	24.0245	24.0706	24.3811	23.7923	23.8891	24.1143
P55284	Cadherin-1	1	1	15.9122	16.9717	16.179		14.3408
P61022	Cadherin-5	4	4	19.7903	24.9348	19.6879	25.6302	25.6958	25.4459	21.4597	19.9162	20.6698
A0A0R4J194	Calcineurin B homologous protein 1	1	1	19.4764		18.9919			18.9062			19.0696
Q8BH59	Calcium channel voltage-dependent subunit beta 1	4	4	23.6116	23.6792	23.4386	22.6951	22.613	22.5033	22.1399	22.1724	22.0276
Q06138	Calcium-binding mitochondrial carrier protein Aralar1	15	12	26.1315	25.875	25.9076	25.98	26.8496	26.9399	28.231	28.0887	28.0928
Q9DB16	Calcium-binding protein 39	6	3	22.495	22.6706	22.2341		21.6925	21.3667	21.3836	21.9305	21.3022
Q9CR86	Calcium-binding protein 39-like	3	3	20.2514	22.1914	21.5954	21.8417	22.1997	22.2278	23.5293	23.7834	23.7948
E9Q559	Calcium-regulated heat stable protein 1	6	1
Q3UHH0	Calcium-transporting ATPase	6	1	26.1808	25.948	25.8938	25.1877	25.4766	25.4084	26.8002	26.4123	26.6347
Q8BW96	Calcium-transporting ATPase	1	1	13.9894	17.1323	16.3779
P28652	Calcium/calmodulin-dependent protein kinase type 1D	6	1	20.8487	20.7185	21.2066	23.1628	23.3322	22.9681	22.1068	22.682	22.1357
Q6PHZ2	Calcium/calmodulin-dependent protein kinase type II subunit beta	8	5	26.9716	26.819	26.8344	27.452	27.409	27.5556	27.3814	27.1737	27.3063
Q923T9	Calcium/calmodulin-dependent protein kinase type II subunit delta	6	2	20.6608	20.8527	20.3656	19.5854	20.1016	19.9059	19.7898	20.5926	19.7987
Q9CXW3	Calcium/calmodulin-dependent protein kinase type II subunit gamma	12	12	27.2268	27.2078	27.222	25.1584	25.1901	25.0486	25.9214	26.0653	26.2825
A0A2I3BPX5	Calcyclin-binding protein	1	1	21.3036		20.7562	20.2712		20.47			20.2813
E9QA15	Calcyphosin-like protein	31	31	27.9972	27.9908	27.8607	26.8564	26.9415	26.8767	28.2966	27.6855	28.4301
P0DP27	Caldesmon 1	5	4	23.5503	23.4042	23.1986	20.973	21.0186	21.7297	21.4597	22.566	22.3863
P35564	Calmodulin-2	3	3	20.6477	20.1285	20.7518		19.848	20.4256
O88456	Calnexin	9	9	26.0554	25.983	26.0224	25.7985	25.8081	25.722	26.7055	26.5726	26.3173
O35350	Calpain small subunit 1	23	23	26.0792	26.3401	26.1513	25.8402	25.7281	25.6353	26.7165	26.6932	26.8914
O08529	Calpain-1 catalytic subunit	19	19	26.1924	26.0821	26.1715	25.8783	25.6397	26.1656	25.7944	25.7035	26.222
Q64691	Calpain-2 catalytic subunit	1	1
Q9R1S8	Calpain-3	3	3	17.6837	18.0057	18.175
P51125	Calpain-7	18	18	25.9511	26.0222	25.8443	24.7727	24.4024	24.3634	25.7532	25.5837	25.5562
Q08091	Calpastatin	6	6	24.8695	24.8682	24.9804	22.7848	22.9401	22.4476	23.3675	23.5093	23.1436
Q08093	Calponin-1	4	3	21.1747	20.9703	20.9225		19.4228
Q9DAW9	Calponin-2	5	4	27.5536	27.7019	27.7689	22.0174	21.791	22.1145	23.2836	23.9765	21.8303
E9PZ67	Calponin-3	5	5		19.9924	20.8143
O09165	Calsequestrin (Fragment)	1	1	21.4528	21.499	21.5803	20.4362	20.3622	20.1444		20.739	20.7991
P05132	Calsequestrin-1	6	3	25.2866	24.7177	24.707	25.3231	25.1967	25.3693	25.2404	25.7407	25.439
P68181	cAMP-dependent protein kinase catalytic subunit alpha	4	1	20.2491	20.6316	20.3163				20.9419		20.512
A0A0A6YX73	cAMP-dependent protein kinase catalytic subunit beta	7	7	23.008	22.9799	23.4203	22.6992	20.0715	22.1812	21.9523	21.2501	21.8079
P31324	cAMP-dependent protein kinase type II-alpha regulatory subunit	2	2
P56212	cAMP-dependent protein kinase type II-beta regulatory subunit	5	4	23.7581	24.2035	23.9122	21.8301	22.2354	22.0275	23.5771	23.4367	23.2708
Q9CQA9	cAMP-regulated phosphoprotein 19	1	1	19.8399	19.5573	18.0689				18.9065	19.919	19.9865
Q922J3	Cancer-related nucleoside-triphosphatase homolog	9	7	22.3772	22.502	22.1696	20.3752	21.2289	20.6444	21.6782	21.8837	21.4805
Q9Z0H8	CAP-Gly domain-containing linker protein 1	3	1	23.0796	22.9521	22.6616	23.4044	23.0025	23.1103	23.2236	23.0713	22.8667
Q9DBC3	CAP-Gly domain-containing linker protein 2	4	4	21.9886	22.0386	21.3183	22.0007	21.9874	21.9037	22.3119	22.3465	22.307
Q60865	Cap-specific mRNA (nucleoside-2'-O-)-methyltransferase 1	10	10	22.7902	22.691	22.7569	20.3244	21.4122	20.3249	23.0856	22.96	23.2581
Q8C196	Caprin-1	63	63	30.5737	30.5807	30.5646	28.8766	28.7691	28.9125	28.5084	28.522	28.6812
P00920	Carbamoyl-phosphate synthase [ammonia], mitochondrial	6	6	24.6313	24.9153	24.9267	25.163	25.1059	25.16	25.705	25.777	25.8499
P16015	Carbonic anhydrase 2	10	10	27.9167	27.7984	27.7837	27.0377	25.8377	25.7266	26.4295	26.3747	26.2016
P48758	Carbonic anhydrase 3	17	16	27.6719	27.446	27.6589	27.6996	27.7784	27.8504	28.4492	28.4078	28.4943
P08074	Carbonyl reductase [NADPH] 1	8	8	23.6375	23.6552	23.7289	23.294	22.529	22.4816	21.7567	22.2782	22.632
Q8K354	Carbonyl reductase [NADPH] 2	4	3	21.6294	21.7711	21.3154	21.2829	22.0583	21.8239	17.2353	16.775	17.6197
D3Z6C4	Carbonyl reductase [NADPH] 3	1	1
P23953	Carbonyl reductase family member 4 (Fragment)	6	6
Q7TPZ8	Carboxylesterase 1C	1	1				20.8816	20.4678	20.5233	20.7701	20.5663
Q9JHH6	Carboxypeptidase	14	14	26.5003	26.5336	27.0449	27.1057	27.1468	27.2791	28.3298	28.4575	28.4077
Q9JJN5	Carboxypeptidase A1	9	9	25.3573	25.2743	25.4311	26.4903	26.5665	26.5777	25.7885	26.2681	25.8341
Q9DBB9	Carboxypeptidase B2	16	16	26.3951	26.3132	26.4725	25.6444	25.8033	25.731	27.2694	27.2072	27.206
G3X8T3	Carboxypeptidase N catalytic chain	1	1	16.7015	17.1059	16.8625	15.6826	16.0501	16.1401		14.2659
H7BX88	Carboxypeptidase N subunit 2	19	19	25.8948	25.6909	25.422	25.2427	25.1966	25.3331	24.2174	24.3844	24.3898
P97742	Carnitine O-palmitoyltransferase 1, liver isoform	2	2	20.1856		21.0437	19.3867	19.8153	20.612		19.6449
P52825	Carnitine O-palmitoyltransferase 2, mitochondrial	17	17	25.4671	25.3237	25.446	23.991	23.8361	23.3409	23.3662	23.3992	23.7239
Q80UY1	Carnitine O=-acetyltransferase	7	7	22.6804	22.9186	22.5765	22.0646	22.4456	22.5701	22.9472	22.7706	22.5072
Q66K08	Carnosine N-methyltransferase	12	12	26.7325	26.7129	26.5481	27.2717	27.128	27.1262	27.1611	27.122	26.9225
E9PWB2	Cartilage intermediate layer protein 1	3	3	19.8871	20.1118	19.8763
Q3TYE1	Casein kinase I isoform alpha	1	1	15.8958	16.2685	15.9398		12.2456			12.0191
Q60737	Casein kinase I isoform epsilon	6	6	22.3011	22.0436	22.4097	22.2323	22.6552	22.4295	22.5928	22.5886	22.758
P70677	Casein kinase II subunit alpha	2	2
P97864	Caspase-3	3	3	20.2562	20.3447	19.439	19.6077			21.273	20.9183	20.7163
P24270	Caspase-7	21	21	28.5934	28.5864	28.5743	27.9502	27.9903	27.9604	28.2456	28.3523	28.2264
P26231	Catalase	21	20	25.6959	25.6784	25.6588	24.3979	24.4741	24.202	24.9014	25.1322	24.6825
Q65CL1	Catenin alpha-1	2	1				16.4917	16.2803	16.6864	17.3895	17.5977	17.8975
Q02248	Catenin alpha-3	3	2	18.2746	18.3513	16.9809		17.8178			15.8515	16.3585
P30999	Catenin beta-1	6	6	22.8113	23.2757	22.5794	22.2667	22.8264	21.236	23.0074	23.1656	22.507
P51437	Catenin delta-1	5	5	22.0751	22.096	19.3335	19.1543	22.4637	22.8993	24.5794	24.7288	24.6308
P10605	Cathelicidin antimicrobial peptide	5	5	22.1106	22.2846	22.2941	19.5645	19.3588	19.2985	19.8527	20.2116	19.8538
O54724	Cathepsin B	11	11	27.8573	27.5802	27.3907	26.4321	25.3588	25.4093	26.406	26.2699	26.2108
Q63918	Caveolae-associated protein 1	10	10	28.1828	28.2088	28.1221	28.0799	27.7985	27.6273	26.5746	26.5872	26.6602
Q91VJ2	Caveolae-associated protein 2	9	9	24.9545	24.7615	24.7182	21.9098	22.693	21.4555	23.5173	23.0697	22.8244
H3BKG0	Caveolae-associated protein 3	1	1	21.8739	21.8235	22.2597				21.33	19.371
Q8K1J6	Caveolin-1	8	8	24.2139	24.376	23.7929	22.295	22.5588	22.3183	24.2085	24.1458	24.2037
A0A0U1RNN8	CCA tRNA nucleotidyltransferase 1, mitochondrial	1	1
Q9JKY0	CCR4-NOT transcription complex subunit 3 (Fragment)	3	3	24.0366	23.7854	23.7206	22.4797	22.5638	22.769	23.7207	23.4015	23.6121
O35566	CCR4-NOT transcription complex subunit 9	2	2	23.6661	23.5067	23.3065	21.0317	22.967	22.4488	21.8322	21.72	21.714
Q9JLQ0	CD151 antigen	18	18	26.1315	26.1954	25.9637	25.3792	25.3946	25.3718	26.0902	26.2997	25.999
Q9QWK4	CD2-associated protein	7	7	23.2046	23.3171	23.4238	24.7559	24.6944	24.5664	23.9584	23.9968	23.8004
A0A140LJL0	CD5 antigen-like	1	1							19.9091	20.3277
P40240	CD81 antigen (Fragment)	3	3	23.6027	23.2573	23.4337	23.0722	22.9071	23.1361	23.5963	23.7798	23.9161
Q8VCN6	CD9 antigen	1	1	20.2275	20.3994	20.3225			23.2722
Q8CJ53	CD99 antigen	10	10	24.0284	24.1869	23.7837	22.7172	23.3492	22.8894	23.7182	23.7639	23.5944
Q91WS0	Cdc42-interacting protein 4	4	4	23.4872	23.2065	23.8864	22.462	22.2862	22.6426	23.0025	23.0538	23.0405
Q99LM2	CDGSH iron-sulfur domain-containing protein 1	3	3		20.4496			19.7305	20.325	21.4395	19.5004	19.8116
A2AN61	CDK5 regulatory subunit-associated protein 3	1	1	20.3234	21.4298	20.2931
Q8BI72	CDKN1A-interacting zinc finger protein 1	2	2		18.3817	17.1166	16.3958	17.6329	16.8386	18.6578	18.5999	18.2614
Q3TZM7	CDKN2A-interacting protein	1	1	19.3872	19.1658	18.8851	19.1197	19.3582	19.0719	19.7763	19.1392	20.0893
Q8VDP4	Cell adhesion molecule-related/down-regulated by oncogenes (Fragment)	3	3	24.7054	24.6869	24.5687	24.7388	24.6341	25.1658	25.144	24.6858	24.366
P60766	Cell cycle and apoptosis regulator protein 2	7	6	25.119	24.8912	24.1967	23.601	24.2257	23.8546	24.4731	24.2056	24.1329
Q9Z1X9	Cell division control protein 42 homolog	1	1
Q6A068	Cell division control protein 45 homolog	3	3	20.4706	20.7661	20.3053				19.5925	18.8869	19.0983
Q8CH18	Cell division cycle 5-like protein	1	1	16.8026	16.4285	15.9418	13.4943	15.0218	14.4797	14.1384	12.9845
Q08288	Cell division cycle and apoptosis regulator protein 1	1	1	20.628	20.5499	20.8083	21.0294	21.4084	19.1576	20.7188	20.2761	20.6584
A0A0N4SVS6	Cell growth-regulating nucleolar protein	3	1	22.95	23.1378	22.6913	20.6806			21.4722	20.3606	20.9076
P53996	Cellular nucleic acid-binding protein	3	1	25.3384	25.4813	24.965	24.3796	24.6461	24.7292	25.5801	25.3374	25.4584
Q9R1K9	Cellular nucleic acid-binding protein	3	3		20.7093	19.6997				19.3025	20.416	20.556
Q6RT24	Centrin-2	5	5		21.9127	21.7803	22.155	22.8092	22.1376		22.2612	22.5364
A2ABQ5	Centromere-associated protein E	1	1
Q6ZQ06	Centrosomal protein of 112 kDa (Fragment)	3	3	26.3536	26.1618	26.0797	25.7816	25.833	25.794	25.6481	25.6748	25.4946
A2A9K3	Centrosomal protein of 162 kDa	1	1	20.5084		20.7448				22.0093	21.2754
Q924Z4	Centrosomal protein of 85 kDa	2	2	21.4745	21.4774	21.6135						22.2885
A2A6T1	Ceramide synthase 2	2	2	26.5281	15.7886	15.807	27.0221	19.6855				20.1027
G3UXG1	Cerebellar degeneration-related protein 2-like	5	1	27.7795	27.5204	27.5715	26.8127	27.2028	27.0256	27.5997	27.2007	27.3244
G3X8Q5	Ceruloplasmin	18	14	25.1542	25.1079	25.2099	24.3373	24.9878	24.8354	25.0274	25.1548	24.9365
P0C605	Ceruloplasmin (Fragment)	3	3	20.184	20.0766		20.3642	20.3176	19.9917	20.2724	20.0126	20.126
Q921W0	cGMP-dependent protein kinase 1	3	3	23.9469	23.9248	23.0611	22.2068	22.0428	22.1801	22.4366	23.2609	23.2909
Q99LU0	Charged multivesicular body protein 1a	4	4	24.1984	24.3467	24.3299	23.0753	23.1314	23.2346	24.6112	24.2797	24.4061
Q9DB34	Charged multivesicular body protein 1b-1	3	3	24.3163	24.3935	24.1048	25.2032	25.2113	25.3824	23.9212	23.6426	23.6952
Q8BJF9	Charged multivesicular body protein 2a	2	2		22.3359	21.8205
Q9CQ10	Charged multivesicular body protein 2b	7	7	25.0932	24.9702	25.3056	24.171	24.1267	24.2424	24.9813	25.0549	24.9907
Q9D8B3	Charged multivesicular body protein 3	8	8	26.969	27.3268	27.1658	27.2748	27.3656	27.3512	26.8278	26.739	26.8756
Q9D7S9	Charged multivesicular body protein 4b	2	2		21.3012	19.4281				21.1459	20.7409	21.5293
A0A0N4SVV4	Charged multivesicular body protein 5	7	2	26.3118	26.2236	26.379	26.4832	26.4373	26.6519	26.5421	26.7504	26.7757
Q9EQI5	Chemerin	4	4	22.6415	23.6903	23.0725	20.9099	21.8068	22.0779	22.3371	22.9886	22.3863
Q3V2R3	Chemokine subfamily B Cys-X-Cys	1	1	16.0856		17.3292			15.4537
F7D8T8	Chimaerin	1	1	18.7591	18.3518	17.93	17.3527	16.7091	16.8386	17.322	16.6404	15.8619
E9Q2I1	Chitinase-like 5 (Fragment)	1	1	21.1417	20.9062	21.2637	20.2589	19.8702	20.5264	21.6616	22.0749	21.9181
Q9Z1Q5	Chloride channel protein	9	9	25.7135	25.5881	25.5101	24.8294	24.6907	24.8217	24.8991	24.6986	24.4683
Q9QYB1	Chloride intracellular channel protein 1	11	11	24.5527	24.7045	24.908	24.0823	24.3713	24.0547	21.7551	20.5331	22.5039
Q6X893	Chloride intracellular channel protein 4	5	5	20.5828	21.0815	21.1185	20.3367	20.0161	19.6662	20.6918	20.539	20.7166
Q8BY89	Choline transporter-like protein 1	6	6	22.2992	22.7247	22.3525	22.5059	22.3665	22.5029	22.2412	21.8793	21.5774
P49586	Choline transporter-like protein 2	8	8	24.3077	24.2932	24.0496	22.6281	23.6531	23.2822	24.6272	24.3379	24.2214
O55226	Choline-phosphate cytidylyltransferase A	5	5	24.4313	24.1218	24.7	23.1783	22.9304	22.6397	23.4243	23.5907	24.0987
Q6IQX7	Chondroadherin	1	1
Q9Z0E2	Chondroitin sulfate synthase 2	1	1		17.9882	18.3713				18.9433	18.985	18.8824
Q920C1	Chordin	2	2	17.5843	20.5053	20.857	19.59	20.1754	19.6161	16.7447	19.8588	16.7647
P83917	Chordin-like protein 1	2	2	21.254	21.0855	21.0862	20.7693	20.3465
P23198	Chromobox protein homolog 1	5	5	25.373	25.2672	25.3266	23.3108	23.6115	23.7422	24.9619	24.9132	24.9203
Q61686	Chromobox protein homolog 3	4	4	23.0024	23.1392	22.7937	19.66	21.1023		22.4533	23.0051	22.8293
Q6PDQ2	Chromobox protein homolog 5	5	5	23.7224	23.9597	23.9696	23.0665	23.522	23.4337		19.8301	20.8149
Q8K327	Chromodomain-helicase-DNA-binding protein 4	1	1							17.0544	17.2466	16.9827
A4QPC5	Chromosome alignment-maintaining phosphoprotein 1	1	1	19.1812	19.2481	19.2905		20.9632	20.676
E9Q743	Chymase	1	1	22.8073	22.552	22.4962	23.8246	24.0623	23.9751	22.7275	22.2857	22.4232
E9Q5M6	Cilia- and flagella-associated protein 251	1	1
Q3UY96	Cilia- and flagella-associated protein 44	1	1	21.2164	21.262	21.9278	21.5583	21.6808	21.533	21.1022	21.4754	21.6652
D3YUW7	Cilia- and flagella-associated protein 74	2	2	18.9674	18.9541	18.638
B2RSU6	Cingulin	1	1		18.342				15.557	18.164	18.1644	15.2979
Q8K3M1	Cingulin-like 1	5	3	18.354	19.2504		18.6068			19.8679	21.4434	20.364
Q8K5C8	Cis-retinol/3alpha hydroxysterol short-chain dehydrogenase-like protein	8	1	22.9652	22.7182	23.1321	23.7011	23.5967	23.6645	23.2763	23.3574	22.9875
Q8R4N0	Cis-retinol/androgen dehydrogenase type 3	5	5	23.8169	23.7526	23.5238	21.0042	21.0117	19.8389	22.9846	22.0547	23.2552
Q9CZU6	Citramalyl-CoA lyase, mitochondrial	13	13	26.3111	28.2238	26.3912	24.943	25.2537	25.2266	25.0934	25.0294	25.1265
O35185	Citrate synthase, mitochondrial	1	1	24.2019	24.2417	24.0592	24.6367	24.9428	24.7919	25.8376	25.766	25.6066
Q68FD5	Class E basic helix-loop-helix protein 40	45	45	28.1397	28.0659	28.0074	27.7758	27.777	27.6033	27.8454	27.8096	27.7702
Q5M6W3	Clathrin heavy chain 1	1	1	26.5154	25.922	26.1434	27.5474	27.7965	27.6646	26.0839	26.0715	26.1417
Q99KN9	Clathrin heavy chain linker domain-containing protein 1	6	6	22.2391	22.2228	22.4107	22.253	22.4857	22.3071	22.0892	22.2746	22.3361
Q6IRU5	Clathrin interactor 1	2	2	19.837	19.7872	19.5577	19.1972	18.476	18.5183	19.8857	19.8357	19.6903
A0A1D5RLS2	Clathrin light chain B	3	3	22.0918	21.576	22.1095	20.8285	20.6329	20.8831	21.8517	22.119	22.0513
H3BJW3	Cleavage and polyadenylation specificity factor subunit 5 (Fragment)	8	8	23.3274	23.2257	23.2126	22.3607	21.9554	21.7988	22.6147	22.5703	22.5299
A0A494B9T0	Cleavage and polyadenylation specificity factor subunit 6	1	1
Q8BIQ5	Cleavage and polyadenylation-specificity factor subunit 7 (Fragment)	4	4	19.8906	20.1236	19.5577	19.5299	19.5192	18.9275	21.1205	20.4831	20.2269
E9Q6L0	Cleavage stimulation factor subunit 2	1	1	18.7584			21.4469	21.6305	21.6672	21.2319	21.5269	21.1871
A0A0R4J140	CLIP-associating protein 1	1	1	20.5139	20.6433	19.9383
Q06890	Clustered mitochondria protein homolog	18	18	29.5888	29.6427	29.485	29.6784	29.5467	29.5071	29.9707	29.9423	29.9299
A0A0R4J0B4	Clusterin	2	2	18.9369	18.7752	19.0337	20.3035	20.5489	21.1839	20.5549	21.093	20.9535
Q9CQI6	CMP-N-acetylneuraminic acid synthase	4	4	23.0899	23.0201	23.1414	21.3447	20.1995	21.205	22.013	22.2414	22.2303
P16294	Coactosin-like protein	9	9	21.1133	20.2371	20.9065	23.6609	23.6886	23.6985	22.1807	22.6143	22.5376
O88783	Coagulation factor IX	66	66	28.8672	28.8931	28.848	29.7617	29.6026	29.826	30.4111	30.3243	30.257
O88947	Coagulation factor V	16	16	28.1061	28.0278	28.1006	28.892	28.9844	28.9136	28.4644	28.552	28.5164
Q91Y47	Coagulation factor X	17	17	26.5777	26.4707	26.4412	26.869	26.8753	26.7338	26.9435	26.7875	26.6476
Q80YC5	Coagulation factor XI	15	15	29.2062	29.2035	29.3099	30.321	30.3592	30.3483	30.0022	30.0259	30.0796
Q8BH61	Coagulation factor XII	23	23	26.9343	26.9085	27.0264	28.6679	28.712	28.6952	27.8335	27.8374	27.809
Q07968	Coagulation factor XIII A chain	35	35	28.2536	28.7075	28.889	29.177	29.4128	29.1973	28.8615	28.8212	28.8717
Q8CIE6	Coagulation factor XIII B chain	25	25	26.9093	26.7166	26.8495	26.5664	26.5957	26.4952	26.9198	26.875	26.9078
Q9JIF7	Coatomer subunit alpha	20	20	26.4049	25.6104	24.9277	25.7816	24.436	24.3052	25.2872	25.6899	25.6517
O55029	Coatomer subunit beta	14	14	24.5095	24.6309	24.6335	22.9759	23.2697	23.1627	24.4624	23.9807	23.4915
Q5XJY5	Coatomer subunit beta'	25	25	27.2554	27.1215	27.0301	26.852	26.7246	26.4106	27.4852	27.3527	27.4227
D3Z315	Coatomer subunit delta	8	8	24.1871	26.0419	21.1004	23.3022	23.0199	23.2639	24.6327	24.6863	24.622
Q9QZE5	Coatomer subunit epsilon (Fragment)	20	20	24.8079	24.8625	24.7312	24.7486	24.919	24.9482	25.1835	24.6242	24.5441
Q9QXK3	Coatomer subunit gamma-1	3	3
P18760	Coatomer subunit gamma-2	9	8	29.6172	29.5748	29.4722	28.8283	28.8396	28.8116	29.3032	29.2646	29.4019
P45591	Cofilin-1	4	3	26.1838	26.2943	25.9848	25.7362	25.8608	25.8546	25.2981	25.1891	25.109
D6RHQ7	Cofilin-2	1	1
O35638	Cohesin subunit SA-1	1	1	18.1686	18.4983	18.3901	16.2817	18.2496	17.5029	16.5502	16.1833	17.345
Q8K1A6	Cohesin subunit SA-2	1	1				18.4035	20.5063	20.2323	21.3166	21.3495	20.9849
E9PVZ3	Coiled-coil and C2 domain-containing protein 1A	1	1	22.0575	21.944	21.9224
Q8BYN7	Coiled-coil domain-containing 144B	1	1	20.9176	21.223	20.7412
Q0VF22	Coiled-coil domain-containing protein 13 (Fragment)	1	1				22.0649	22.0509	21.8895
Q8CDI6	Coiled-coil domain-containing protein 138	6	6	25.4885	27.8648	25.1796	28.0575	28.1248	28.0121	23.2512	23.5472	23.5895
Q3UHB8	Coiled-coil domain-containing protein 158	1	1	24.3617	24.4947	24.3855	24.4369	24.5178	24.5805	24.4333	24.3828	24.3252
Q9JIG7	Coiled-coil domain-containing protein 177	1	1	19.6129	19.7779	19.4337				19.3271	24.9502	25.0849
Q78PG9	Coiled-coil domain-containing protein 22	8	8	24.9094	23.9679	24.3466	23.71	23.7018	23.6182	24.743	25.3371	24.6402
E9Q2S9	Coiled-coil domain-containing protein 25	1	1	20.1331	19.4339	19.4471	19.0413	19.1537	19.0004	20.0287	19.4159	20.285
A0A668KL36	Coiled-coil domain-containing protein 43	4	4	22.8333	22.8545	22.5583	22.7625	22.4984	22.2155	23.1713	22.6291	22.8424
D3YZP9	Coiled-coil domain-containing protein 50	2	2	19.1706	19.8997	19.278		15.4813
Q91W50	Coiled-coil domain-containing protein 6	16	16	25.4762	25.3261	25.5317	26.0638	25.9764	26.0164	25.6725	25.6567	25.6198
P11087	Cold shock domain-containing protein E1	9	9	26.9708	27.091	27.5057	26.8348	26.9673	26.8849	26.7942	26.8134	26.6418
P28481	Collagen alpha-1(I) chain	5	5	24.8223	24.8579	24.9481	24.4994	24.8229	24.8068	25.052	25.206	25.1699
P08121	Collagen alpha-1(II) chain	10	10	24.1818	24.1066	23.7922	25.0052	24.9937	24.9002	25.039	24.8484	24.5742
Q04857	Collagen alpha-1(III) chain	11	11	25.6158	25.628	25.7673	25.7465	25.7937	25.7458	26.004	25.9792	25.9056
Q60847	Collagen alpha-1(VI) chain	26	26	26.7225	26.5598	26.8755	26.6307	26.633	26.7134	26.0229	25.4817	25.5974
Q80X19	Collagen alpha-1(XII) chain	59	59	29.71	29.748	29.7273	29.4143	29.5267	29.452	29.5314	29.6266	29.6256
Q8BLX7	Collagen alpha-1(XIV) chain	4	4	21.9352	21.5592	22.2321	22.2115	22.3736	23.0849	21.7957	22.4323	22.2024
P39061	Collagen alpha-1(XVI) chain	3	3	21.702	22.0863	21.7794	18.184	18.4714	18.4024	19.6678	16.8161	17.8985
Q01149	Collagen alpha-1(XVIII) chain	7	7	26.3282	26.4457	26.7407	26.6243	26.6841	26.6461	26.0981	26.3164	26.3705
Q02788	Collagen alpha-2(I) chain	9	9	25.5872	24.4802	24.0026	23.731	24.0258	25.3196	24.2232	23.5197	24.2278
E9Q6A6	Collagen alpha-2(VI) chain	1	1
A0A2I3BPR1	Collagen alpha-6(VI) chain	2	2	26.9677	26.8663	26.782	24.3088	24.0762	23.7714	26.4473	26.1545	26.2411
E9PWQ3	Collagen triple helix repeat-containing protein 1	61	61	29.0435	29.112	28.9096	28.9016	28.7211	28.8879	30.635	28.615	28.6176
Q8CF98	Collagen, type VI, alpha 3	3	3	19.7827	19.5851	19.4969	20.3138	20.8669	20.5075	20.4555	20.5826	20.4182
Q3SXB8	Collectin-10	2	2
A0A0G2JE35	Collectin-11	1	1
A0A3Q4EHW7	Collybistin	2	2		19.4872	20.0554	20.8759	20.121	20.7335		27.7859	20.7837
Q8BXC6	COMM domain-containing protein 10	2	2	21.2264	21.4433	21.2742	19.3659		18.7979	19.4098		20.076
Q8BG94	COMM domain-containing protein 2	1	1
P98086	COMM domain-containing protein 7	8	8	27.1546	27.0619	27.2836	28.5902	28.4624	28.4181	28.6546	28.6577	28.507
P14106	Complement C1q subcomponent subunit A	9	9	28.8041	28.7228	28.7103	29.6348	29.6644	29.5371	29.3123	29.0889	29.1159
Q02105	Complement C1q subcomponent subunit B	6	6	28.0292	27.9498	28.0986	29.2582	29.2598	29.1179	29.5805	28.7512	28.7948
Q8CG16	Complement C1q subcomponent subunit C	21	21	27.7936	27.6875	27.715	28.9621	29.0609	29.0189	28.5392	28.585	28.6278
Q8CG14	Complement C1r-A subcomponent	20	15	27.9951	27.8927	28.7205	29.0849	29.0509	28.621	29.2298	28.9294	28.901
Q8CFG8	Complement C1s-A subcomponent	6	1							21.6248	22.357	22.5108
P21180	Complement C1s-B subcomponent	21	12	25.2601	25.1701	25.0297	25.5954	25.6394	25.7485	25.1672	25.0621	25.1212
P01027	Complement C2	126	126	34.5547	34.5571	34.5322	34.8579	34.8563	34.8491	34.7669	34.7645	34.7399
P01029	Complement C3	68	68	30.4368	30.512	30.5134	30.6655	30.6685	30.8027	30.6466	30.6624	30.6596
P06684	Complement C4-B	65	65	29.4062	29.3872	29.8668	29.5664	29.6857	29.6	29.1675	29.2298	29.2176
D3YXF5	Complement C5	7	7	24.26	24.1567	23.2016	23.1953	23.7578	23.7733	22.9456	22.322	22.6323
E9Q6D8	Complement component 7	11	11	28.3317	28.3808	27.7666	28.0524	28.2021	28.2762	28.6332	28.4558	28.1921
Q8K182	Complement component C6	21	21	26.9181	27.0527	26.7432	27.2851	27.3045	27.4123	27.1152	27.1114	27.0705
Q8BH35	Complement component C8 alpha chain	18	18	27.9035	27.9224	27.7114	27.4303	27.1152	27.3701	26.1323	26.7441	26.4404
Q8VCG4	Complement component C8 beta chain	10	10	23.411	23.4592	24.2633	24.4154	24.3455	24.6797	24.4294	24.7826	24.8193
P06683	Complement component C8 gamma chain	26	26	28.3314	27.9356	28.4767	29.1198	29.0131	28.981	28.7544	28.6992	29.4183
A0A0A6YY75	Complement component C9	1	1	20.383	20.4296	20.0759	19.2437	19.4445		20.4295	20.1614	21.2232
H3BK95	Complement component receptor 1-like protein	20	1	22.6228	22.1052	22.2143	23.2031	23.2069	22.5415	22.4779	22.4594	22.4976
P03953	Complement factor B (Fragment)	2	2	22.0579	22.0174	22.0108	21.8024	21.633	22.0389	21.9859	22.0067	21.8036
P06909	Complement factor D	81	71	32.6895	32.6708	32.6942	33.3577	33.424	33.404	32.7108	32.6495	32.6817
Q61406	Complement factor H	9	9	27.79	27.7495	27.5849	29.0926	28.8806	28.9788	29.0912	29.0787	28.9344
Q4LDF6	Complement factor H-related 1	11	2	21.9487	20.9796	21.8943	21.4178	21.5698	22.4143	22.2036	23.2066	22.1954
E9Q8B5	Complement factor H-related 2	38	35	29.3967	29.2574	29.2895	30.1207	30.2182	30.2238	30.3477	30.2399	30.3321
Q61129	Complement factor H-related 4	25	25	29.2246	29.2273	29.1337	29.7824	29.804	29.7862	29.6427	29.5149	29.4359
Q8JZN5	Complement factor I	4	4	23.3217	23.1834	23.5065	23.9633	23.8948	23.8792	23.8216	24.6001	24.5068
Q3U422	Complex I assembly factor ACAD9, mitochondrial	1	1	18.3585	18.1624	17.92				17.2012	17.3052	17.353
Q8R1B5	Complex I-9kD	1	1	22.3025	22.1418	22.3587	21.5893	21.5998	21.7562	21.467	22.1617	21.7909
E9PY48	Complexin-3	1	1
Q810S7	Condensin-2 complex subunit H2	1	1
Q8R1U1	Conserved oligomeric Golgi complex subunit 1	1	1
Q6A0A9	Conserved oligomeric Golgi complex subunit 4	8	8	22.4969	22.4332	22.3155	21.6134	21.2712	21.7418	22.7837	22.4682	21.9586
Q99LD4	Constitutive coactivator of PPAR-gamma-like protein 1	9	9	22.5317	23.6554	22.431	22.3387	22.2487	22.5602	23.0453	23.2867	23.1117
P61202	COP9 signalosome complex subunit 1	14	14	26.0951	25.9393	26.0347	25.5544	25.5675	25.6497	26.3361	26.2271	26.2282
O88543	COP9 signalosome complex subunit 2	6	6	21.6368	22.0018	21.8523	20.9347	21.8074	21.7682	21.224	21.006	21.2479
O88544	COP9 signalosome complex subunit 4	14	14	23.6537	23.1774	22.8578	22.6908	23.0608	23.5065	22.6643	22.0854	23.2499
O35864	COP9 signalosome complex subunit 5	2	2	21.286	21.4163
O88545	COP9 signalosome complex subunit 6	4	4	21.1212	21.3667	21.3278	21.8245	22.1499	22.3195	20.6873	20.8289	21.1714
D3YVI6	COP9 signalosome complex subunit 7a (Fragment)	4	4	22.8399	22.2485		22.7303	22.6952	22.9006	23.3299	23.1787	23.7802
D3Z440	COP9 signalosome complex subunit 7a (Fragment)	1	1	20.3346	22.6773			20.1373		21.0659	21.3258	20.8973
Q8VBV7	COP9 signalosome complex subunit 8	1	1
Q8C166	Copine-1	3	2	19.3182	19.1257	19.046
Q8BT60	Copine-3	5	4	22.9838	23.028	22.8807	20.8734	20.2875	20.6617	21.2386	21.9766	21.7059
Q0VE82	Copine-7	1	1	24.5709	24.4301	24.3163	23.6066	23.5779	23.654	23.7136	23.4222	23.6672
F8WHX2	Copper homeostasis protein cutC homolog	2	2	22.0222	21.3295	22.1293	20.9018	21.5569	21.3271	20.7301	20.1339	21.1133
Q3UMF0	Cordon-bleu protein-like 1	30	30	25.5131	25.6157	25.2705	24.3134	24.1062	24.2793	25.3799	25.2735	25.2505
Q9QZQ8	Core histone macro-H2A.1	6	6	21.9492	21.3672	21.6556	21.1843	23.348	24.4621	24.2287	23.5186	25.0409
Q7TPC1	Corneodesmosin	1	1	20.6884	20.39	20.7563	21.2352	20.6924	20.9761	20.8924	21.3092	21.3944
O89053	Coronin-1A	17	16	28.3248	27.9951	28.0135	27.0582	27.1894	27.2785	28.1603	28.1077	28.0134
Q9WUM3	Coronin-1B	14	14	27.09	27.0868	26.9979	26.6194	26.5357	26.6885	27.5215	27.4129	27.3151
Q9WUM4	Coronin-1C	14	11	26.284	26.4022	26.4641	25.2994	25.7173	25.6491	26.1582	26.409	26.2262
Q920M5	Coronin-6	3	1	17.6108	16.8903	19.7791	18.6528	19.0702	18.8106
Q9D2V7	Coronin-7	1	1	18.5292	18.3434	19.0628
P50172	Corticosteroid 11-beta-dehydrogenase isozyme 1	10	10	27.6737	27.6002	27.7031	27.2097	27.2283	27.2435	27.9904	27.9164	27.9052
Q06770	Corticosteroid-binding globulin	1	1		18.2789	18.4841	18.9836	18.9286		19.7983	19.4975	19.0165
P97792	Coxsackievirus and adenovirus receptor homolog	2	2	20.4649	21.2937	20.6655	18.4735	20.1766	19.1192	19.2009	20.2816	19.1727
O88271	Craniofacial development protein 1	4	4	22.4361	22.0451	22.2066	21.6855	21.7412	21.5294	22.3158	21.3485	20.9076
P07310	Creatine kinase	33	11	33.2178	33.2706	33.1853	32.7159	32.7344	32.8051	32.7822	32.7832	32.7861
A0A0J9YKD4	Creatine kinase M-type	23	1	23.6165	23.7648	23.9683	24.2885	24.3057	24.3342	23.9989	24.1521	24.1343
Q6P8J7	Creatine kinase S-type, mitochondrial	21	19	27.9873	27.968	27.9643	26.2345	26.3982	26.2717	26.92	26.8506	27.0217
P30275	Creatine kinase U-type, mitochondrial	7	5	24.4622	23.5709	23.4811	21.9645	21.8355	22.1685	20.6643	21.1645	21.1195
P70698	CTP synthase 1	5	5	21.5676	21.9661	20.9563	20.2659	20.8233	19.9382
Q99LJ0	CTTNBP2 N-terminal-like protein	1	1	23.3085	22.7736	22.8247	22.6099	20.7499	21.6034	23.0658	22.7981	23.0341
A0A494BBK6	CUE domain-containing protein 2 (Fragment)	1	1	20.6174			21.4307
P28659	CUGBP Elav-like family member 1	3	2	22.5297	22.6348	22.5342	20.6157	19.7936		22.8355	22.8978	22.7476
V9GX43	CUGBP Elav-like family member 2 (Fragment)	7	6	22.4257	22.782	23.0532	20.4812	19.6737		21.2889	21.216	20.7721
Q9WTX6	Cullin-1	11	11	23.1443	23.005	22.8964	23.0771	22.8617	22.8233	22.258	22.7819	22.7434
Q9D4H8	Cullin-2	13	13	25.2427	25.0949	24.9986	24.0511	23.7807	23.6963	24.798	24.8272	24.7248
Q9JLV5	Cullin-3	18	18	26.4413	26.2295	26.0976	25.2109	25.4501	25.3469	26.2554	26.0012	26.2266
Q3TCH7	Cullin-4A	9	8			20.284	22.0526	20.7628	20.9026	19.5757
A2A432	Cullin-4B	8	7	21.3596	20.6876	21.0726	20.9603	20.5143	19.2678	22.0641	21.8453	21.7536
Q9D5V5	Cullin-5	22	22	25.4449	25.1376	25.1419	24.5453	24.8825	24.7415	25.5664	25.637	25.4027
Q6ZQ38	Cullin-associated NEDD8-dissociated protein 1	35	34	28.2773	28.1874	28.3053	28.2566	28.3147	28.0881	28.5988	28.661	28.6682
Q6ZQ73	Cullin-associated NEDD8-dissociated protein 2	10	9	21.2795	21.2974	21.0404	21.5752	21.4768	21.4634	22.0948	21.8963	21.9662
Q8CI33	CWF19-like protein 1	4	4	22.767	22.5118	22.8631	23.7095	22.6943	22.5923	23.9091	23.6397	22.3712
Q8K0D0	Cyclin-dependent kinase 17	1	1
A0A1Y7VIW8	Cyclin-dependent kinase 20	1	1
P46414	Cyclin-dependent kinase inhibitor 1B	2	2	20.9969	19.0907	19.4469		20.1305	19.718	20.3133		20.9946
P49615	Cyclin-dependent-like kinase 5	6	6	20.9867	21.5283	21.3324				21.5355	21.2551	21.2121
Q3UUW5	Cyclin-H	1	1
Q8BHZ0	CYFIP-related Rac1 interactor A	2	1
Q921M7	CYFIP-related Rac1 interactor B	3	2	22.6495	22.9976	22.7076	24.1725	24.2411	24.3737	23.044	23.0784	22.9754
B2RXZ2	Cyp2a22 protein	4	1
Q91X75	Cyp2a4 protein	16	14	25.6926	25.4245	25.5641	25.4094	25.5645	25.3707	26.3882	27.1175	26.4912
Q9D1B1	Cystatin E/M	1	1	19.4644	18.58					19.6764	20.3096	21.6078
P21460	Cystatin-C	3	3	22.2833	21.9705	22.2642	23.0183	23.2666	23.2069	22.5653	22.2685	22.7289
P97315	Cysteine and glycine-rich protein 1	7	7	28.5526	28.4717	28.5546	28.5757	28.6455	28.3172	28.3378	28.4951	28.4337
P97314	Cysteine and glycine-rich protein 2	8	8	26.2232	26.4025	26.1814	24.6446	24.6566	24.9981	26.3942	26.0506	26.3698
P50462	Cysteine and glycine-rich protein 3	8	8	27.8234	27.9983	27.889	26.3038	26.3093	26.1968	26.0592	25.9398	25.8039
Q9D1P4	Cysteine and histidine-rich domain-containing protein 1	17	17	27.6599	27.6481	27.4313	25.8682	25.7935	25.977	26.1103	25.9505	26.1283
F6TXD3	Cysteine desulfurase (Fragment)	1	1
Q9ER72	Cysteine--tRNA ligase, cytoplasmic	22	22	24.7656	25.3368	25.1039	24.7116	24.728	24.8332	26.0046	25.8084	25.5633
P63254	Cysteine-rich protein 1	5	5	29.3147	29.6146	29.5259	27.3096	27.7589	27.3417	28.4491	28.0454	28.2954
Q9DCT8	Cysteine-rich protein 2	12	12	28.1113	28.0382	28.2064	26.852	26.9406	26.8927	27.6937	27.6743	27.7163
G3UZZ7	Cystin-1 (Fragment)	1	1	19.3247	18.9917	18.9836						19.7762
Q61093	Cytochrome b-245 heavy chain	3	3	21.6415	21.5187	22.0194		19.6241
Q61462	Cytochrome b-245 light chain	1	1
Q9DB77	Cytochrome b-c1 complex subunit 2, mitochondrial	7	7	24.0417	23.924	24.089	22.6527	22.469	22.5041	22.7922	23.2922	22.5175
Q9D855	Cytochrome b-c1 complex subunit 7	2	2	20.7749	21.0045	20.8743		20.606				20.2981
Q9CR68	Cytochrome b-c1 complex subunit Rieske, mitochondrial	1	1	21.5281	21.44	21.5842
Q9CQX2	Cytochrome b5 type B	1	1
P00405	Cytochrome c oxidase subunit 2	1	1	21.5571	21.6946	21.2192	19.7652	19.8246	19.5318		19.393
P00416	Cytochrome c oxidase subunit 3	1	1
P19783	Cytochrome c oxidase subunit 4 isoform 1, mitochondrial	4	4	22.0714	21.3697	20.9161					19.9297
P19536	Cytochrome c oxidase subunit 5B, mitochondrial	2	2	19.3785	19.4649	18.9638	17.1698	18.6991	18.146		18.536	18.355
P56391	Cytochrome c oxidase subunit 6B1	4	4	25.4603	25.3058	25.5617	24.3428	23.9716	24.3193	24.0376	23.9029	24.0501
Q9CPQ1	Cytochrome c oxidase subunit 6C	2	2	21.7409	21.8165	21.517	19.7148	19.6924		20.2131	20.2839
Q62425	Cytochrome c oxidase subunit NDUFA4	4	4	23.8475	24.8124	24.4919	21.352	20.7833	21.1867	22.13	21.5254	22.0207
Q9D0M3	Cytochrome c1, heme protein, mitochondrial	7	7	24.5619	24.8087	24.706	22.6498	22.7093	22.5381	24.6088	24.5999	24.6469
P00186	Cytochrome P450 1A2	15	15	24.3717	24.4503	24.2746	24.0463	24.3363	23.9133	25.2878	25.4681	25.419
P56593	Cytochrome P450 2A12	7	3	23.8503	23.6372	23.8434	23.9474	24.1031	24.0755	24.1605	24.0738	24.0846
P12790	Cytochrome P450 2B9	7	4	20.9185	20.5031	21.0596	19.6547		19.565	21.6344	21.407	21.7242
Q64458	Cytochrome P450 2C29	21	13	28.0888	27.8309	27.8968	26.5651	26.4698	26.4866	27.786	28.0329	27.6582
P56654	Cytochrome P450 2C37	19	5	25.5716	25.5906	25.7005	24.0761	24.5764	24.6836	25.4727	25.9979	25.9167
P56656	Cytochrome P450 2C39	16	13	24.8282	25.7543	25.6458	23.8796	24.1953	23.3066	26.1123	25.8525	26.001
E9Q7C8	Cytochrome P450 2C40	10	8	24.5328	24.5934	24.8601	23.6884	23.6093	23.4974	23.4774	23.4782	23.1248
Q91X77	Cytochrome P450 2C50	25	7	29.4997	29.3178	29.2467	28.5412	28.5125	28.6441	29.1415	29.3447	29.3176
Q6XVG2	Cytochrome P450 2C54	23	10	24.2556	24.0126	24.5145	24.3309	24.3494	24.4824	25.1292	25.3083	25.1526
Q91W64	Cytochrome P450 2C70	12	11	23.9316	24.3584	24.4184	23.2622	22.5599	23.4434	23.8752	23.8139	24.2152
P24456	Cytochrome P450 2D10	13	10	26.6605	26.5299	26.607	26.0898	26.5144	26.2408	27.1759	27.5596	27.4411
A0A0R4IZY2	Cytochrome P450 2D26	18	16	26.9401	26.9437	26.9646	26.4638	26.3121	26.4914	27.1811	27.3259	27.2023
P11714	Cytochrome P450 2D9	5	3	20.8945	20.3271	21.0717	23.1437	23.7787	23.5891	23.3335	23.987	24.3386
Q05421	Cytochrome P450 2E1	22	22	26.7705	26.7384	26.9473	26.758	26.7922	26.856	27.8205	27.8992	27.7507
P33267	Cytochrome P450 2F2	7	6	20.9331	21.5543	22.1544		22.0389	22.5957	21.3791	22.5735	22.7616
O54749	Cytochrome P450 2J5	4	4							20.1029	20.0196	19.399
Q9DBX6	Cytochrome P450 2S1	13	13	24.6497	24.6737	24.5043	20.7495	20.305	19.8075	22.5134	21.4873	21.0385
Q64459	Cytochrome P450 3A11	15	8	26.3686	26.2515	26.402	26.4146	26.8124	26.7033	26.9924	27.122	27.0642
O09158	Cytochrome P450 3A25	5	5								20.1654	20.223
Q9JMA7	Cytochrome P450 3A41	9	3	19.374	19.8494	21.0171	22.2076	20.2674	20.6333	21.5779	21.5871	21.7014
O35728	Cytochrome P450 4A14	4	4	23.2083	23.2914	23.4822	22.5376	22.5689	23.0454	23.8272	24.0905	23.9636
Q9JKY7	Cytochrome P450 CYP2D22	8	7	23.9095	24.2299	23.7467	21.9673	22.2746	22.116	23.8967	23.802	23.4661
G3UW81	Cytochrome P450, family 4, subfamily f, polypeptide 40	2	2							19.2726	20.3828	20.9878
A2A517	Cytohesin-1 (Fragment)	1	1		17.022		18.0458	18.5834	18.2799	20.2039	20.0902	20.203
Q80YW0	Cytohesin-4	1	1				22.1654	22.2832		22.2526	22.0441	22.2085
P28271	Cytoplasmic aconitate hydratase	25	25	26.3254	26.5133	26.5071	26.3203	26.2455	26.21	26.6745	26.6663	26.7205
Q9JHU4	Cytoplasmic dynein 1 heavy chain 1	116	116	27.7821	28.0079	27.6425	26.7412	27.2098	26.9578	27.7602	28.0999	27.7475
O88487	Cytoplasmic dynein 1 intermediate chain 2	9	9	24.4058	24.4976	24.3791	23.6466	23.9738	23.2169	24.6866	24.682	24.7028
Q8R1Q8	Cytoplasmic dynein 1 light intermediate chain 1	11	10	24.6566	24.6035	24.6147	23.1483	23.2455	23.4023	23.4907	24.1537	24.3922
Q6PDL0	Cytoplasmic dynein 1 light intermediate chain 2	10	9	22.3895	22.0391	22.0335	22.2627	22.0724	21.7623	23.3449	22.544	22.9811
Q7TMB8	Cytoplasmic FMR1-interacting protein 1	23	23	28.0603	27.7123	27.3368	26.3286	26.5802	26.2675	26.2318	26.3993	26.3655
Q99M51	Cytoplasmic protein NCK1	5	5	21.7382	21.9154	21.8849				21.4953		20.8045
Q8BMK4	Cytoskeleton-associated protein 4	9	9	24.2222	24.334	24.0304	22.8855	22.8819	23.1083	23.9782	24.2168	24.1449
A2AGT5	Cytoskeleton-associated protein 5	7	7	24.8193	25.0524	24.7833	24.814	24.3512	24.3192	24.7718	24.3811	24.4515
Q9CPY7	Cytosol aminopeptidase	21	21	27.3262	27.2714	27.4368	26.7604	26.7456	26.857	27.6924	27.7872	27.7943
Q8R0Y6	Cytosolic 10-formyltetrahydrofolate dehydrogenase	18	18	24.9227	24.815	24.847	24.4944	24.4901	24.4487	25.2778	25.2622	25.2101
Q9D020	Cytosolic 5'-nucleotidase 3A	5	5	21.5337	21.7546	21.7012	20.7524	20.3217
Q91V12	Cytosolic acyl coenzyme A thioester hydrolase	5	5	21.6416	20.7958	22.1109			19.9881	20.2917	20.7105	21.7453
Q8BX80	Cytosolic endo-beta-N-acetylglucosaminidase	1	1	19.3062	19.4322	19.0373	17.3965	17.8565	17.7677	18.6925	18.6816	18.5814
Q9D1A2	Cytosolic non-specific dipeptidase	5	5	21.8301	21.2265	21.749	22.1079	22.0156	22.0842	21.344	21.902	21.795
Q64GA5	Cytosolic phospholipase A2 gamma	5	5	21.5394	21.2371	21.3225	22.3621	22.1844	22.1962	21.1399	21.7334	21.4315
Q61753	D-3-phosphoglycerate dehydrogenase	16	16	26.6079	26.7586	26.7812	26.046	26.0873	26.0627	27.272	27.2533	26.9293
Q9DD18	D-aminoacyl-tRNA deacylase 1	3	3	21.9342	21.5942	21.2812	19.4055	20.1057	19.9399	22.579	22.2342	22.4242
Q8BHA3	D-aminoacyl-tRNA deacylase 2	4	4							22.1159	22.5013	22.5028
Q80XN0	D-beta-hydroxybutyrate dehydrogenase, mitochondrial	9	9	23.4294	23.4743	23.3841	21.1261	19.4792		19.368	20.0408	18.7327
Q8BH86	D-glutamate cyclase, mitochondrial	5	5	17.7441	20.7745	20.3886	21.2152	20.6341	21.0215	22.9101	22.9768	22.6426
B9EJA5	D17H6S56E-3 protein	1	1	20.0313	19.6806	19.3863	19.2755			21.2625	21.3595	21.2584
Q9JII5	DAZ-associated protein 1	3	3	22.1921	22.7702	23.086	21.3163	21.3932	20.9844	22.4393	22.9286	22.5909
Q8K3H0	DCC-interacting protein 13-alpha	1	1	19.4326	18.8758	18.9897	16.7509	17.4256	17.1724	18.7237	18.6661	18.5718
Q9QZ73	DCN1-like protein 1	7	7	22.9743	23.1622	23.0342	21.9374	22.0173	23.5318	22.2093	22.1158	21.9555
Q8BZJ7	DCN1-like protein 2	2	2	19.7555	19.9257	19.2547	19.6112		20.2903	20.6386	20.4043	20.3615
Q8N7N5	DDB1- and CUL4-associated factor 8	1	1	19.9578	19.5116	19.1679	19.3723	19.5439		20.2996	20.0966	20.3946
Q8VDF3	Death-associated protein kinase 2	1	1	17.2577	16.9066	16.9504	15.4181	16.8764	17.0782
P28654	Decorin	6	6	23.6559	23.1309	23.8824	23.0986	23.7254	24.6286	23.6337	23.7826	24.01
Q8BUR4	Dedicator of cytokinesis protein 1	1	1	16.6114	18.2348			16.957	17.0045	19.0592	19.1153	18.7944
A2AF47	Dedicator of cytokinesis protein 11	7	7	25.8605	25.7301	26.0874	25.5634	25.7691	25.6145	25.3423	25.3737	25.3778
Q8C3J5	Dedicator of cytokinesis protein 2	8	8	22.5946	21.4258	22.3736	23.9547	24.1215	24.1603	24.5658	24.4337	24.5915
B2RY04	Dedicator of cytokinesis protein 5	2	2							18.5859	19.1264	18.7462
A2A9M4	Dedicator of cytokinesis protein 7	1	1	18.164	17.9945	17.8316	16.6602	16.9588
Q99L04	Dehydrogenase/reductase SDR family member 1	10	10	23.6703	23.6797	23.4643	23.7404	23.2212	23.686	24.0811	24.049	24.0976
Q99LB2	Dehydrogenase/reductase SDR family member 4	12	12	24.9752	24.909	24.5781	24.9546	24.9541	24.7693	24.9339	25.1934	24.8077
A0A1Y7VN19	Dehydrogenase/reductase SDR family member 7 (Fragment)	2	2
Q8CHT0	Delta-1-pyrroline-5-carboxylate dehydrogenase, mitochondrial	14	14	26.7068	26.9115	26.9125	25.9091	25.6057	25.894	25.3076	25.0553	25.2561
P10518	Delta-aminolevulinic acid dehydratase	1	1	18.9773	19.1019	18.355
P82347	Delta-sarcoglycan	1	1	21.9744	21.1185	21.5747						20.7363
Q3U9G9	Delta(14)-sterol reductase LBR	1	1	19.5036	20.9254	20.4786
Q8VCH6	Delta(24)-sterol reductase	1	1	19.7855	20.3276	20.1736
O35459	Delta(3,5)-Delta(2,4)-dienoyl-CoA isomerase, mitochondrial	1	1	22.9707	22.9868	22.9752	24.0006	23.6808	24.0755		19.6971	20.1985
Q9WV69	Dematin	4	4	21.4243	21.4404	21.0459	20.5106	20.1178	20.5164	22.2727	21.7958	22.1705
Q9CQJ6	Density-regulated protein	6	6	24.9153	24.4859	24.6578	23.9032	24.2283	23.8616	28.252	24.9465	28.141
E0CXZ5	Deoxynucleoside triphosphate triphosphohydrolase SAMHD1	3	1
Q60710	Deoxynucleoside triphosphate triphosphohydrolase SAMHD1	21	19	26.9165	26.9623	26.9092	25.7961	25.7282	25.8936	26.4553	26.1976	26.344
Q8R2M2	Deoxynucleotidyltransferase terminal-interacting protein 2	1	1	15.6744	15.4922	16.1518		14.1053		14.387	13.9674	14.6296
Q91YP3	Deoxyribose-phosphate aldolase	4	4	20.1567	21.0327	20.6358	18.3733	17.9366	17.9611	20.763	20.6183	20.9889
Q570Y9	DEP domain-containing mTOR-interacting protein	3	3	18.6104	18.6849	21.3489	17.5057	20.6711	20.8797	21.3558	21.1622	21.3937
Q8BHC4	Dephospho-CoA kinase domain-containing protein	1	1
Q6P253	Dermokine	3	3
Q61495	Desmoglein-1-alpha	4	4	23.326	23.391	23.8473	24.4509	24.5707	24.384	24.4205	24.4163	24.2579
E9Q557	Desmoplakin	34	34	26.5753	26.3174	26.5771	27.0677	27.0559	26.9501	26.9203	26.9928	26.981
Q9R0P5	Destrin	11	11	30.1876	30.371	30.1339	30.6777	30.3824	30.4685	30.679	30.6009	30.5851
Q8CDG3	Deubiquitinating protein VCPIP1	11	11	20.2547	23.0326	19.29	21.3976	24.7537	22.4714	23.0395	23.2863	22.9908
P32233	Developmentally-regulated GTP-binding protein 1	5	4	20.7019	16.3479		16.3462			20.3429	18.6334	20.4814
Q9QXB9	Developmentally-regulated GTP-binding protein 2	5	4	19.6249	20.0819	19.5657				19.067	19.7938	19.3252
A2AHJ7	Diacylglycerol kinase	1	1	17.4832	17.062	16.5948	16.838	17.1367	16.7025	18.9036	18.3615	18.164
P00375	Dihydrofolate reductase	4	4	22.8788	21.8449	22.9126	20.2981	21.5168	22.1266	22.4048	21.8758	22.6623
O08749	Dihydrolipoyl dehydrogenase, mitochondrial	11	11	26.1712	26.6661	26.4428	24.3465	25.6112	25.0761	24.0282	25.1362	24.9741
Q9D2G2	Dihydrolipoyllysine-residue succinyltransferase component of 2-oxoglutarate dehydrogenase complex, mitochondrial	4	4	21.5421	21.6486	21.8637
Q9EQF5	Dihydropyrimidinase	8	8	23.8372	23.8081	23.699	22.6448	22.1371	22.3307	23.3797	23.307	23.943
O08553	Dihydropyrimidinase-related protein 2	26	24	28.6784	28.658	28.8179	28.2611	28.4262	27.9015	28.6023	28.7791	28.7931
E9PWE8	Dihydropyrimidinase-related protein 3	26	24	27.5688	27.5324	27.6373	25.9308	26.2606	26.0403	26.9059	26.4192	26.3468
Q9EQF6	Dihydropyrimidinase-related protein 5	1	1	19.0566	18.67						17.8114
P50285	Dimethylaniline monooxygenase [N-oxide-forming] 1	16	16	27.1228	27.1085	26.962	26.5169	26.2422	26.2054	26.9728	26.8348	26.8198
Q8K2I3	Dimethylaniline monooxygenase [N-oxide-forming] 2	20	20	26.8972	27.0832	27.4434	25.597	26.0948	26.1288	26.1319	26.2622	26.0977
P97501	Dimethylaniline monooxygenase [N-oxide-forming] 3	13	13	25.9381	26.0671	25.9339	24.3578	24.1756	24.418	25.9807	25.7386	25.9919
Q9DBT9	Dimethylglycine dehydrogenase, mitochondrial	9	9	22.6774	22.582	22.7968		18.0628
P28843	Dipeptidyl peptidase 4	30	30	29.1034	28.9766	29.0327	28.6376	28.7474	28.7178	29.0034	29.0797	29.1208
Q8R2U6	Diphosphoinositol polyphosphate phosphohydrolase 2	4	4	21.0481	20.8458	21.4147	21.0816	19.6656	19.9883	21.9559	20.8772	20.5236
Q8CI75	DIS3-like exonuclease 2	4	4	19.1709	18.9343					19.6649	19.2862	19.7607
P98078	Disabled homolog 2	11	11	24.0594	24.0226	23.8154	22.8931	22.9242	22.8269	23.6888	22.9268	22.7888
Q3UH60	Disco-interacting protein 2 homolog B	3	3	25.4616	25.4728	25.1762	24.3076	24.425	24.6574	25.0323	24.8115	24.4252
O35598	Disintegrin and metalloproteinase domain-containing protein 10	9	9	24.7986	24.559	24.7338	25.4603	25.4182	25.6277	25.4045	25.4793	25.5343
H7BWY4	Disks large homolog 1	7	7	21.5368	21.9025	21.9157		23.9805	21.3036	20.2839	19.3058	19.4803
A2BEF2	Disks large homolog 3	1	1	14.83	15.6599	15.2922	17.0529	16.8987	16.5454
B1AZP2	Disks large-associated protein 4	7	7	22.9993	21.8072	22.6319	22.5915	22.1426	24.4381	22.2414	25.6904	22.4866
J3QNW0	DNA (cytosine-5)-methyltransferase	3	3	16.7462	17.0632	16.5343	16.4209		14.5947
O54786	DNA fragmentation factor subunit alpha	1	1
Q8R055	DNA ligase	1	1
P43247	DNA mismatch repair protein Msh2	3	3	21.4385	21.5333	22.7552	22.9429	22.9864	22.6254	22.7999	22.7195	22.9061
P13705	DNA mismatch repair protein Msh3	1	1	21.6883	21.8429	22.068	20.3979	20.5747	20.932	22.0863	22.5093	22.2668
P54276	DNA mismatch repair protein Msh6	1	1	20.8994	20.8723					24.8744	25.0773	25.0893
O54956	DNA polymerase epsilon subunit 2	1	1
Q60596	DNA repair protein XRCC1	1	1	17.8011	17.9551	16.8823	16.1261		16.0324
P97310	DNA replication licensing factor MCM2	1	1	16.1573	16.3888			15.685		15.6139		15.5183
Q04750	DNA topoisomerase 1	7	7	21.2178	20.86	21.1359				20.9876	20.7227	21.1404
Q01320	DNA topoisomerase 2-alpha	1	1	18.4664		18.4074				19.206	18.7009	18.7666
P28352	DNA-(apurinic or apyrimidinic site) endonuclease	8	8	25.805	25.6444	25.7756	25.1621	24.7934	24.656	25.3036	25.9195	25.2171
P97313	DNA-dependent protein kinase catalytic subunit	1	1	25.3881	25.0632	25.2221	25.2586	25.2799	25.5325	24.7543	24.7529	24.6541
Q6P6I6	DNA-directed RNA polymerase II subunit GRINL1A	2	2	19.1654	19.9811	19.5827	18.2521	19.3274	19.0009	15.5804		15.8194
P59470	DNA-directed RNA polymerase III subunit RPC2	2	2	27.7948	27.7079	27.5161	27.009	27.0477	26.8555	28.406	28.4119	28.0739
P63037	DnaJ homolog subfamily A member 1	13	12	26.0159	26.0422	25.6463	25.5327	25.2389	25.0741	26.3541	26.421	26.3796
Q9QYJ0	DnaJ homolog subfamily A member 2	8	8	24.0875	24.6804	24.4324	23.9805	23.9632	24.4159	25.5045	25.5347	25.2432
Q9JMC3	DnaJ homolog subfamily A member 4	5	5	24.2608	24.2667	24.1983	23.9412	23.5529	23.7038	24.5715	24.6999	24.5511
Q9QYJ3	DnaJ homolog subfamily B member 1	12	11	24.2838	24.3414	25.1174	25.0437	24.2012	24.99	25.8985	25.4521	25.6217
Q99KV1	DnaJ homolog subfamily B member 11	5	5	22.1064	22.4063	22.3624	20.7146	20.476		21.6937	21.7567	22.363
Q8C4C9	DnaJ homolog subfamily B member 12	4	4	20.585	19.1864	19.7727	21.4366		20.18	21.8062		22.845
Q9D832	DnaJ homolog subfamily B member 4	9	8	24.2391	24.0127	24.3343	23.5219	23.1262	23.5785	24.3505	24.8131	25.0215
Q61712	DnaJ homolog subfamily C member 1	1	1
Q9DC23	DnaJ homolog subfamily C member 10	1	1	20.4338	20.5724	20.2983				20.176		20.3238
Q91WT4	DnaJ homolog subfamily C member 17	1	1								20.288	20.3554
Q91YW3	DnaJ homolog subfamily C member 3	11	11	25.2641	25.2917	25.2634	24.6879	24.7132	24.7228	24.1847	24.335	25.1735
Q9QYI3	DnaJ homolog subfamily C member 7	8	8	20.1074	20.0117		19.8633	13.6794	13.5266	16.7308	16.9941	20.8123
Q6NZB0	DnaJ homolog subfamily C member 8	4	4	24.5214	24.0989	24.225	22.7003	22.653	22.4195	23.2109	23.8391	23.7906
Q91WN1	DnaJ homolog subfamily C member 9	3	3	22.5558	22.3637	21.9654		21.4119	21.0631	26.2312	22.1116
O70469	Docking protein 2	1	1	17.7225	18.9519	17.6505
O54734	Dolichyl-diphosphooligosaccharide--protein glycosyltransferase 48 kDa subunit	7	7	23.3842	23.202	23.4998	24.7702	24.8872	25.1727	22.5228	23.5482	23.1881
Q91YQ5	Dolichyl-diphosphooligosaccharide--protein glycosyltransferase subunit 1	19	19	27.3439	27.2662	27.5126	26.1583	26.3964	26.3041	26.2074	26.0199	25.9907
Q9DBG6	Dolichyl-diphosphooligosaccharide--protein glycosyltransferase subunit 2	9	9	24.0013	24.018	23.6883	21.6034	20.6607	21.9952	20.5417	20.7869	23.0098
P46978	Dolichyl-diphosphooligosaccharide--protein glycosyltransferase subunit STT3A	8	8		21.1788	21.3234	21.1296		20.5586	22.4651	23.0025	22.6569
Q9D6N5	Dr1-associated corepressor	1	1	21.1178	20.9923	20.7573	20.2322		19.9781	21.6124	21.1933	21.4281
Q62418	Drebrin-like protein	3	3	19.6961	19.8449	19.1828		17.601
P31938	Dual specificity mitogen-activated protein kinase kinase 1	1	1	20.3288	20.3677	20.0821
Q63932	Dual specificity mitogen-activated protein kinase kinase 2	5	5	22.078	22.2998	22.4101	22.2998	22.4085	22.4549	24.1257	23.9616	23.706
O09110	Dual specificity mitogen-activated protein kinase kinase 3	5	5	23.1644	23.0432	22.9657	22.0643	22.0331	22.2082	22.862	22.2781	22.295
P47809	Dual specificity mitogen-activated protein kinase kinase 4	9	9	22.3342	21.9109	22.8762	29.137	29.093	29.0517	23.9306	23.4023	24.8456
P70236	Dual specificity mitogen-activated protein kinase kinase 6	2	2
F2Z3V2	Dual-specificity protein kinase CLK4	1	1
Q3TPW2	Dual-specificity protein kinase TTK	1	1				20.3503	21.1143		21.4136
E9Q586	Dynactin subunit 1	29	29	26.4877	26.5894	26.2688	26.6251	26.6482	26.5652	26.8451	26.6332	26.6228
Q99KJ8	Dynactin subunit 2	10	10	26.367	26.201	26.1237	25.9595	26.0328	25.9245	26.486	26.1014	25.963
Q8CBY8	Dynactin subunit 4	6	6	22.8122	22.836	22.6775	22.8457	22.795	22.849	23.7444	23.8171	23.8754
Q9QZB9	Dynactin subunit 5	2	2	20.6186	20.5975	20.5299		19.6417		19.876		20.5821
Q9WUB4	Dynactin subunit 6	2	2	20.0266	20.9805	20.4312		18.8156		21.7863	20.8994
G3UZZ3	Dynamin GTPase (Fragment)	21	15	26.1936	25.4165	26.0082	25.7174	25.5615	25.4808	26.3437	26.3296	26.3627
P39053	Dynamin-1	8	2	18.3084	18.3917	17.9148	14.9837	16.9355	16.3874
E9PUD2	Dynamin-1-like protein	14	14	24.8628	24.1154	25.0019	24.5372	24.6982	24.7431	24.8956	24.7636	25.08
P58281	Dynamin-like 120 kDa protein, mitochondrial	8	8	20.7723	21.6666	22.0994	24.3923	24.5265	24.9	24.4852	24.8789	24.9319
Q8VHE6	Dynein axonemal heavy chain 5	1	1
B2RY71	Dynein axonemal intermediate chain 3	1	1	20.9339	21.2898
P63168	Dynein light chain 1, cytoplasmic	4	4	25.2408	25.4784	24.8899	24.2997	24.2469	24.9461	24.3048	24.9146	24.1161
E9Q0B6	Dynein, axonemal, heavy chain 6	1	1
S4R1Y6	Dystonin (Fragment)	2	2	21.5492	21.5038	20.4866	21.2349	20.6543	21.1401	22.6033	22.5701	21.6387
A2A9Z1	Dystrophin	1	1	17.4363	17.4187				16.6568	17.7427	17.9073	17.7684
Q9ERU9	E3 SUMO=-protein ligase ZNF451	10	10	25.237	25.3676	25.0798	25.6953	25.541	25.515	26.2607	25.7219	25.8574
Q8C0P7	E3 ubiquitin-protein ligase	1	1	18.941	18.7098	17.8619	18.3764	18.0349	18.0217	18.059	17.8682	17.609
Q5DTM8	E3 ubiquitin-protein ligase BRE1A	3	3	17.4937	17.3553	17.6697	16.3315	16.9146	16.4178	17.7691	17.3307	17.9777
P22682	E3 ubiquitin-protein ligase CBL	1	1
Q9WUD1	E3 ubiquitin-protein ligase CHIP	3	3	20.5585	20.4306	20.6216	20.1425	20.103
Q3UIR3	E3 ubiquitin-protein ligase DTX3L	17	17	24.1693	24.088	23.9452	23.0471	23.6063	23.3691	24.423	24.3985	24.3499
Q7TMY8	E3 ubiquitin-protein ligase HUWE1	7	7	19.6561	19.784	19.63	19.0666	22.5049	20.1326		12.2018
Q8C863	E3 ubiquitin-protein ligase Itchy	2	2
Q80SY4	E3 ubiquitin-protein ligase MIB1	3	3			19.1924	21.5498			19.7486	21.1785	19.8653
O70583	E3 ubiquitin-protein ligase Midline-1	1	1	16.2362			14.9016			16.9009	16.9633	16.7202
P46935	E3 ubiquitin-protein ligase NEDD4	15	15	25.2701	25.6647	25.4741	23.7467	23.8405	24.0459	23.5142	23.777	24.0563
A0A286YCB2	E3 ubiquitin-protein ligase PPP1R11 (Fragment)	1	1		16.2384	15.2963	15.1444			16.1482	16.1179	15.6071
G3UZ30	E3 ubiquitin-protein ligase RBX1	1	1
P62878	E3 ubiquitin-protein ligase rififylin	4	4	20.9116	21.3568	20.7302	20.1381	20.293	20.2933	20.353
Q6ZQM0	E3 ubiquitin-protein ligase RNF114	1	1		20.6199	20.2319
Q9ET26	E3 ubiquitin-protein ligase RNF123	3	3	21.144	21.1791	20.8015	17.5266		17.373	20.9389	20.8923	20.9034
Q5XPI3	E3 ubiquitin-protein ligase RNF185	9	9	24.1648	24.0587	23.9554	24.4444	24.3013	24.4691	24.7857	24.944	24.9484
Q91YT2	E3 ubiquitin-protein ligase RNF213	1	1	16.193	16.104	15.8693		13.6855	14.3944	16.4519	16.0503	16.0137
E9Q555	E3 ubiquitin-protein ligase RNF5	17	17	25.9926	25.8727	25.79	25.8977	26.0037	25.9997	26.3537	26.0502	26.1426
O35445	E3 ubiquitin-protein ligase TRIM21	1	1	15.6939	15.4875	15.7865	14.8291	14.959	14.9092	16.9966	17.0552	16.8155
Q3U7K7	E3 ubiquitin-protein ligase TRIM31	1	1
Q8R0K2	E3 ubiquitin-protein ligase UBR1	1	1	21.1775	20.9646	21.0149	20.786	20.5738	20.7399		20.7085
O70481	E3 ubiquitin-protein ligase UBR4	1	1
A2AN08	E3 ubiquitin-protein ligase ZNF598	13	13	24.5872	24.6776	24.8747	24.8625	25.0795	25.1703	25.4264	25.3759	25.407
Q80YR4	E3 ubiquitin/ISG15 ligase TRIM25	1	1									15.4319
Q61510	E3 UFM1-protein ligase 1	11	11	24.4602	24.4401	24.2084	25.4013	25.4442	25.4547	24.8954	25.0518	24.9526
Q8CCJ3	Ear6 protein	6	6	19.8056	19.8022	20.4621		19.6799		21.6462	21.4725	21.5441
Q923L7	Early endosome antigen 1	1	1	21.0541	21.2101	21.5892	21.3084	21.1926	21.0663	20.9662	21.1522	21.0632
Q8BL66	Echinoderm microtubule-associated protein-like 1	2	2	19.5234	20.3037	18.5607	19.7185	19.994	19.7081	20.6581	20.1619	20.7157
Q05BC3	Echinoderm microtubule-associated protein-like 3	18	18	25.1251	25.2537	25.2898	24.7812	25.0509	25.1091	25.439	25.3409	25.1956
Q8VC03	Echinoderm microtubule-associated protein-like 4	1	1	17.4058	17.4522	17.1764	16.7946	18.4465	16.7148	19.0541	19.1831	19.2166
F8WJ93	Ecotropic viral integration site 5-like	4	4	19.9987	21.3859	21.2237	19.7622	19.6629	19.5049	21.9313	21.971	21.9753
H3BL92	Ectonucleoside triphosphate diphosphohydrolase 2	1	1
O55026	Ectonucleotide pyrophosphatase/phosphodiesterase family member 2	4	4	20.6057	20.3254	20.4083	19.2647	19.5162			19.9202	19.9191
Q9R1E6	eEF1A lysine and N-terminal methyltransferase	21	21	24.2313	24.2664	24.5424	25.5893	25.5364	25.7565	25.0631	24.6716	24.8447
Q91YR5	EF-hand and coiled-coil domain-containing protein 1	3	3	21.9547	21.6418	21.5659	21.1428	20.7462	20.7407	21.907	21.6331	21.5541
A0A0A0MQ84	EF-hand calcium-binding domain-containing protein 4A	1	1
Q80ZJ8	EF-hand domain-containing protein D2	1	1
Q8C845	EH domain-containing protein 1	10	10	25.1989	25.2879	25.349	24.5669	24.7773	24.6195	25.2053	25.1535	25.1502
Q9WVK4	EH domain-containing protein 2	29	20	29.1614	29.2825	29.3284	28.913	28.9072	28.906	29.6057	29.6967	29.6763
Q8BH64	EH domain-containing protein 3	28	26	28.7705	28.6569	28.8713	28.4301	28.52	28.5004	28.8076	28.9421	28.8706
Q9QXY6	EH domain-containing protein 4	17	7	23.0215	23.051	23.0891	22.2229	22.2579	22.1858	23.6471	22.7222	22.4846
Q9EQP2	eIF-2-alpha kinase activator GCN1	20	16	26.1919	25.9884	26.9842	26.6935	25.9527	25.9111	26.3533	26.308	26.3191
E9PVA8	EKC/KEOPS complex subunit Tprkb	15	15	22.9833	22.3884	22.0299	22.8037	23.4413	23.427	21.8719	23.2252	22.931
G3X9K8	ELAV-like protein 1	1	1
P70372	Electron transfer flavoprotein subunit alpha, mitochondrial	8	8	23.8873	23.7821	23.3919				23.4731	23.3303	22.9617
Q99LC5	Electron transfer flavoprotein subunit beta	15	15	28.1626	28.1824	28.1747	27.2982	27.2363	27.215	26.8725	26.8893	26.8873
Q9DCW4	Electron transfer flavoprotein-ubiquinone oxidoreductase, mitochondrial	13	13	28.7558	28.7361	28.7229	27.2879	27.3052	27.302	27.0199	27.2001	27.2187
Q921G7	ELKS/Rab6-interacting/CAST family member 1	19	19	26.78	26.7803	26.7262	25.4387	25.4238	25.3997	25.9003	25.0024	24.7814
Q99MI1	Elongation factor 1-alpha 1	4	4	24.8001	25.0054	25.0268	24.6552	24.5221	24.7374	24.4264	24.5293	24.4512
P10126	Elongation factor 1-alpha 2	26	18	31.8653	31.8059	31.9439	31.3811	31.5109	31.474	32.1266	32.2376	32.2976
P62631	Elongation factor 1-beta	19	11	28.3779	28.7961	28.4845	27.9382	27.9347	28.0096	28.1564	28.0456	28.0845
O70251	Elongation factor 1-delta	9	8	26.3051	26.2879	26.3495	25.2712	25.2068	25.2051	26.017	26.0254	26.055
Q80T06	Elongation factor 1-delta	13	2	27.2358	27.2601	27.3268	26.0141	25.8778	25.9111	27.5264	27.4453	27.5394
A0A0R4J1L2	Elongation factor 1-gamma	12	1	21.5233	22.978	20.9091			20.2262
Q9D8N0	Elongation factor 2	15	15	28.5427	28.5537	28.7296	27.8936	27.9723	28.0504	29.0615	29.2041	29.1589
P58252	Elongation factor Ts, mitochondrial	50	48	31.5044	31.5102	31.3699	31.8543	31.7992	31.8417	32.191	32.074	31.9656
Q9CX33	Elongation factor Tu, mitochondrial	1	1	20.8116	20.9037	20.5295		20.1707	18.7476
Q8BFR5	Elongation factor-like GTPase 1	16	16	25.99	26.4249	26.1782	25.1521	25.1802	25.0822	25.1387	25.2902	25.1196
Q8C0D5	Elongator complex protein 3	11	11	24.7222	24.7363	24.4095	23.1151	23.8963	23.8507	26.5786	25.9102	25.9224
A0A286YDB8	Elongator complex protein 4	1	1
Q9ER73	Elongin-A	1	1
Q8CB77	Elongin-C	3	3	23.7793	23.7645	23.8847	25.8346	25.8378	25.8962	24.0113	24.2827	24.1264
P83940	EMILIN-2	3	3	22.0048	21.1967	20.0824	20.589	20.055	20.9664	21.5437	19.7438	21.7377
Q8K482	Endonuclease domain-containing 1 protein	7	7	21.756	22.0537	21.3648	21.9334	21.411	21.7565	18.6335	21.7874	21.8117
Q8C522	Endophilin-A2	1	1
Q62419	Endophilin-B1	6	6	23.1894	23.1666	23.2162	22.7447	22.4357	22.6158	23.4034	23.2974	23.4445
A0A0G2JEC4	Endophilin-B2	6	5	25.385	25.6499	25.6244	25.4171	25.4174	25.2885	25.5771	25.4813	25.4144
Q8R3V5	Endoplasmic reticulum chaperone BiP	3	2	23.04	22.8233	22.8298	22.7582	22.6134	22.6607	22.9078	22.5748	22.4025
P20029	Endoplasmic reticulum metallopeptidase 1	27	25	28.4026	28.2094	28.2943	27.7144	27.5693	27.5966	28.0468	28.1668	28.1281
Q3UVK0	Endoplasmic reticulum resident protein 29	2	2	19.8233	19.7406	19.8047		17.7659			19.3578
P57759	Endoplasmic reticulum resident protein 44	6	6	23.7485	23.6866	23.7342	22.4736	22.484	21.9439	21.2353	21.5198	21.5081
Q9D1Q6	Endoplasmic reticulum-Golgi intermediate compartment protein 1	2	2
A0A494BAK4	Endoplasmin	3	3	23.2074	23.2308	23.3797	22.2338	21.8338	23.0818	19.7972	19.8009
P08113	Endothelial differentiation-related factor 1	29	28	29.2675	29.2339	29.4781	28.5592	28.5511	28.5458	27.9831	28.1227	28.0243
Q9JMG1	Endothelial PAS domain-containing protein 1	4	4	23.1538	23.2421	23.4874	21.1881	22.0404	21.9905	23.1231	23.1245	23.4184
P97481	Engulfment and cell motility protein 1	1	1
Q8BPU7	Enhancer of mRNA-decapping protein 3	4	4	19.8622	20.1253	18.967				20.3835	19.8076
Q8K2D3	Enhancer of mRNA-decapping protein 4	1	1	16.5594	16.2085	15.7175		15.8041	14.865		16.8361	16.2319
Q3UJB9	Enhancer of rudimentary homolog	4	4	23.986	24.1444		23.5561	23.3526	23.6316	23.448	23.064	23.2664
G3UW85	Enoyl-[acyl-carrier-protein] reductase, mitochondrial	1	1
Q9DCS3	Enoyl-CoA delta isomerase 1, mitochondrial	1	1
P42125	Enoyl-CoA delta isomerase 2	11	11	26.3599	26.5734	26.591	24.1554	24.0887	24.3651	25.0717	24.6651	24.4937
Q9WUR2	Enoyl-CoA hydratase, mitochondrial	10	10	23.6495	23.6594	23.4606	21.2169	20.9981	20.8786	21.9231	21.6775	21.0346
Q8BH95	Envoplakin	10	10	27.9679	28.1657	28.1521	27.0797	27.2089	27.2263	28.0224	27.9521	27.8779
Q9D952	Eosinophil-associated, ribonuclease A family, member 11	12	12	23.5008	23.744	23.5097	23.9852	24.347	23.6916	23.3576	22.6261	22.9991
Q8K196	EP300-interacting inhibitor of differentiation 2	1	1			18.4521		18.4136
Q6X7S9	Epidermal growth factor receptor	1	1
Q08509	Epidermal growth factor receptor kinase substrate 8	3	3	22.1399	22.5386	21.9317
Q99K30	Epidermal growth factor receptor kinase substrate 8-like protein 2	1	1				20.1409		19.9648	20.639	21.0354	20.6592
Q01279	Epidermal growth factor receptor substrate 15-like 1	2	2
Q60902	Epimerase family protein SDR39U1	8	8	23.7159	23.5126	23.8852	23.6569	23.4862	23.6711	23.9527	23.8248	23.6262
A0A2I3BQD5	Epithelial membrane protein 3	1	1
O35912	Epoxide hydrolase 1	1	1	20.8395	21.0746	20.5036
Q9D379	Epsin-1	23	23	27.8268	27.6855	27.7417	26.1935	26.2116	25.8499	26.6291	26.7646	26.6635
Q80VP1	ER membrane protein complex subunit 2	2	2
Q9CRD2	ER membrane protein complex subunit 7	2	2	19.8953	20.2844	20.3087	20.4674	20.8451	20.4484
Q9EP72	Erlin-2	1	1	18.9097	19.2627	18.4796		15.9132
Q8BFZ9	ERO1-like protein beta	4	4				25.0176	25.4897	25.3285
A0A1Y7VNF4	ESF1 homolog	1	1	19.9217	20.1387	19.7758
Q3V1V3	Estradiol 17 beta-dehydrogenase 5	1	1	14.6278			12.7364			14.8376	14.6006
D3Z3P8	Estradiol 17 beta-dehydrogenase 5 (Fragment)	11	1		17.9975	17.4402				19.7071	20.0327	19.6087
P70694	Estradiol 17-beta-dehydrogenase 11	25	11	30.0773	30.1528	29.9616	30.0763	29.9292	29.9697	30.6546	30.545	30.4559
Q9EQ06	Estradiol 17-beta-dehydrogenase 2	8	6	24.6983	24.5512	24.1835	22.6825	22.7803	22.6089	23.6271	23.5704	23.6541
P51658	Ethanolamine-phosphate cytidylyltransferase	5	5	22.4056	22.0096	23.0534	21.0751	20.9251	21.8106	24.0025	23.8014	24.1074
Q922E4	Ethanolamine-phosphate phospho-lyase	5	5	22.638	22.479	22.5682	21.7998	21.3109	21.4035	23.4515	23.8969	23.6256
Q8BWU8	Ethylmalonyl-CoA decarboxylase	2	2		20.7633	19.4432				21.544	21.6515	21.543
Q9D9V3	Eukaryotic initiation factor 4A-I	5	5	20.6684	20.4714	21.063	20.2601	20.4927		21.2654	21.2641
P60843	Eukaryotic initiation factor 4A-III	13	13	28.2903	28.3013	28.2842	27.7249	27.7507	27.8893	27.6129	27.6834	27.7381
Q91VC3	Eukaryotic peptide chain release factor GTP-binding subunit ERF3A	13	13	27.2398	26.9367	27.2536	26.7247	26.7066	26.6341	28.1523	28.2907	28.2495
Q8R050	Eukaryotic peptide chain release factor subunit 1	20	20	27.9758	28.0303	28.2807	27.9046	28.1167	28.0879	28.3382	28.3744	28.3464
Q8BWY3	Eukaryotic translation elongation factor 1 epsilon-1	13	13	25.9231	25.9395	25.736	26.2961	26.1128	26.2248	26.1984	26.3356	26.3658
Q9D1M4	Eukaryotic translation initiation factor 1	2	2
P48024	Eukaryotic translation initiation factor 2 subunit 1	4	4	24.9135	24.8638	25.2578	24.3206	24.5352	24.4415	25.3936	25.633	25.5773
Q6ZWX6	Eukaryotic translation initiation factor 2 subunit 2	19	19	26.7467	26.5891	26.5246	25.7187	25.7806	25.6352	26.8869	26.6936	26.7361
Q99L45	Eukaryotic translation initiation factor 2 subunit 3, X-linked	9	9	25.195	25.2237	25.1837	23.8845	23.657	23.5456	25.5117	25.393	25.5525
Q9Z0N1	Eukaryotic translation initiation factor 2A	19	19	26.876	26.8391	26.8952	26.9549	26.881	26.9334	27.2601	27.2119	27.0488
Q8BJW6	Eukaryotic translation initiation factor 2B, subunit 3	16	16	25.3058	25.6355	25.1304	23.9038	23.7319	23.7223	24.6424	24.6734	24.3999
Q3UKV0	Eukaryotic translation initiation factor 2D	5	5	21.6674	21.7304	21.7515	21.2323	21.0489	20.3473	22.8508	22.9388	23.0042
Q61211	Eukaryotic translation initiation factor 3 subunit A	1	1	19.8066	19.7868	19.7509				20.6284	20.1927	20.3789
P23116	Eukaryotic translation initiation factor 3 subunit B	45	45	29.9521	29.9825	29.8591	30.0847	29.7438	29.8101	30.4335	30.3341	30.1902
Q8JZQ9	Eukaryotic translation initiation factor 3 subunit C	29	29	26.578	27.6761	26.7749	26.4625	26.7091	26.5413	29.0099	28.9716	28.9646
Q8R1B4	Eukaryotic translation initiation factor 3 subunit D	15	15	23.9792	23.9166	23.5217	23.1667	23.2347	23.0318	24.4358	24.3568	24.4833
O70194	Eukaryotic translation initiation factor 3 subunit E	7	7	22.5439	22.4429	22.5498			23.9026	23.3237	23.4991	23.7008
P60229	Eukaryotic translation initiation factor 3 subunit F	14	14	25.122	25.1238	24.8711	24.4516	24.2473	24.3173	25.9303	25.9535	25.9104
Q9DCH4	Eukaryotic translation initiation factor 3 subunit G	7	7	23.7497	23.3182	23.4897	24.0614	24.2354	24.1201	24.5751	24.9949	24.9082
Q9Z1D1	Eukaryotic translation initiation factor 3 subunit H	7	7	23.8922	23.8024	23.9492	22.6952	20.3622	22.6131	24.2131	23.9557	23.713
Q91WK2	Eukaryotic translation initiation factor 3 subunit I	9	9	25.3241	25.2353	25.4055	24.52	24.3961	24.4378	25.4342	25.3456	25.2621
Q9QZD9	Eukaryotic translation initiation factor 3 subunit J-B	13	13	24.374	24.1342	23.8043	23.3469	23.121	23.0214	24.7872	24.5146	24.6677
Q66JS6	Eukaryotic translation initiation factor 3 subunit K	10	10	25.3875	25.167	24.8944	24.623	24.2915	24.6446	26.1615	25.9523	25.9937
Q9DBZ5	Eukaryotic translation initiation factor 3 subunit L	3	3		19.0764	19.5411				21.5778	20.7827	21.8816
Q8QZY1	Eukaryotic translation initiation factor 3 subunit M	11	11	26.3891	26.5298	25.745	25.7066	26.2155	25.9724	27.5389	27.557	27.4207
Q99JX4	Eukaryotic translation initiation factor 4 gamma 1	6	6	21.5656	21.0899	22.9157	20.8695	21.7535	22.0707	23.1865	23.8393	23.0877
Q6NZJ6	Eukaryotic translation initiation factor 4 gamma 2	19	18	26.7728	26.7672	26.583	26.9816	26.8307	27.0542	26.9231	26.9597	26.8028
Q62448	Eukaryotic translation initiation factor 4 gamma 3	10	10	23.6893	23.6986	23.8	24.8412	24.8148	24.7148	24.0255	24.0467	24.5076
Q80XI3	Eukaryotic translation initiation factor 4B	10	9	21.9506	22.0353	22.1108	22.5747	22.8177	22.7028	23.9557	23.8277	23.6341
Q8BGD9	Eukaryotic translation initiation factor 4C	14	14	26.2208	26.4748	26.0329	24.7782	24.7681	24.6892	26.6505	26.4282	26.4883
A0A494BB95	Eukaryotic translation initiation factor 4E	4	4	23.9508	24.3094	23.9476	24.0304	23.9216	23.6672	25.383	25.1365	24.939
P63073	Eukaryotic translation initiation factor 4H	7	7	25.233	24.9061	25.171	24.8187	24.746	25.0861	25.0521	25.5069	25.394
Q9WUK2	Eukaryotic translation initiation factor 5	11	11	25.8673	25.8161	25.7968	22.6302	22.8372	22.6715	25.629	25.6697	25.7235
P59325	Eukaryotic translation initiation factor 5A-1	15	15	26.8187	26.6031	26.8269	26.1343	26.2103	26.2351	27.3927	27.2985	27.3427
P63242	Eukaryotic translation initiation factor 5B	7	7	25.3074	25.6409	25.5761	25.9056	25.9111	25.9593	26.1693	26.3549	26.2677
Q05D44	Exo-alpha-sialidase	16	16	24.0559	23.69	23.4416	22.1862	22.3014	22.306	23.6606	23.6943	23.6948
E9Q0I0	Exocyst complex component 1	2	2	19.9829	19.9016	20.0617	20.4144	20.4833	20.4106
Q6P1Y9	Exocyst complex component 4	1	1	22.3048	21.6984	22.2159	20.7261	20.8282	20.5223	21.3671	21.6998	21.4775
O35382	Exocyst complex component 7	8	8	21.1232	20.9981	20.7403	22.0662	22.0461	21.6049	22.417	22.2816	22.1467
O35250	Exocyst complex component 8	3	3
Q6PGF7	Exosome complex component CSL4	4	4	16.7829	18.2754	17.2822	25.1023	25.1598	25.3949	25.4407	25.0949	25.1251
Q9DAA6	Exosome complex exonuclease RRP44	1	1
Q9CSH3	Exostosin-2	2	2	20.8952	20.7246	20.2461		19.1666	19.5154
P70428	Exportin-1	1	1	18.1932	18.1396	18.2247	19.2351	18.845	19.0385	18.6046	19.0917	18.6618
Q6P5F9	Exportin-2	19	19	25.4267	25.353	25.2908	25.5171	25.6856	25.4417	26.1353	26.2417	26.0576
Q9ERK4	Exportin-4	23	23	27.3816	27.2811	27.4007	27.2325	27.2414	27.3715	27.0961	27.0777	27.1879
Q9ESJ0	Exportin-5	1	1
Q924C1	Exportin-7	2	2
Q9EPK7	Expressed sequence AI182371	15	15	22.0606	22.1992	20.8633	24.7637	23.8643	24.8767	24.3158	24.5893	24.9217
A0A2I3BRQ1	Expressed sequence AW551984	9	9	22.9164	23.4233	23.3523	23.4847	23.8216	23.6748	24.8214	23.1442	22.7242
Q8BGF0	Extended synaptotagmin-1	8	7	20.6242	20.6719	21.6167	21.6206	20.5233	20.8371	22.8276	22.7748	22.7423
Q3U7R1	Extracellular matrix protein 1	11	11	25.7936	25.9156	25.6778	26.242	26.1148	26.0063	26.6211	26.4086	26.3187
Q61508	Extracellular superoxide dismutase [Cu-Zn]	33	33	29.6215	29.6882	29.599	29.7201	29.6754	29.6747	29.9149	29.8656	29.8542
O09164	Ezrin	2	2	21.35	21.6807	21.3692	21.7905	21.3262	21.3103	21.2202	21.0555
P26040	F-actin-capping protein subunit alpha-1	46	35	30.7047	30.7273	30.7202	30.3923	30.1586	30.4358	30.6057	30.8751	30.5837
P47753	F-actin-capping protein subunit alpha-2	9	7	24.6732	24.352	24.4567	23.8846	23.8801	24.0623	23.5636	23.3414	22.8547
P47754	F-actin-capping protein subunit beta	12	10	25.366	25.0835	25.3473	24.6571	24.7901	24.7313	25.1688	24.9939	25.061
A2AMW0	F-BAR domain only protein 2 (Fragment)	11	11	25.5807	25.443	25.5288	25.1254	25.1435	25.1476	25.5615	25.5273	25.3928
A0A286YCL2	F-box only protein 50	1	1
G3X9C2	F-box/SPRY domain-containing protein 1	1	1	19.2004	19.1214	18.8827	18.6777	19.267	19.1621	19.5708	19.6238	19.1804
Q8K3B1	FACT complex subunit SPT16	1	1
Q920B9	FACT complex subunit SSRP1	4	4	22.2446	20.353	21.7727	21.9968	21.9723	21.9641	21.7238	21.4863	21.3863
Q08943	Family with sequence similarity 104, member A	1	1
A2A6P4	Family with sequence similarity 184, member A	1	1		15.368
E9PW83	Far upstream element (FUSE)-binding protein 3	1	1	24.602	24.5395	25.0668	24.3968	24.6106	24.831	25.1448	24.8783	24.8749
A2AJ72	Far upstream element-binding protein 1	1	1
Q3UUU2	Far upstream element-binding protein 2	11	10	23.5882	23.9587	23.6713	23.2676	23.1077	22.5448	23.9538	23.8183	23.8012
Q3U0V1	Farnesyl pyrophosphate synthase	16	15	25.5476	25.8505	25.9365	23.6563	23.8608	23.8843	25.3815	25.3402	25.2473
Q920E5	Fas-activated serine/threonine kinase	6	6	25.8096	26.1002	26.0726	25.3236	25.555	25.2191	25.9066	25.8118	25.8001
Q9JIX9	Fascin	1	1	21.1695	20.9686	21.0888			20.0312
Q61553	Fatty acid synthase	4	4	21.4086	20.539	21.7143	22.0132	22.1812	22.0787	19.3736	19.3759	19.8155
P19096	Fatty-acid amide hydrolase 1	50	50	27.4669	27.6347	27.5355	27.569	27.331	27.4573	27.3409	27.2963	27.2411
O08914	Fc fragment of IgG-binding protein	3	3	24.7029	24.268	23.8705	22.8144	22.3319	22.7303	22.9867	22.8352	23.193
E9Q0B5	Fer-1-like protein 5	2	2	27.5407	27.6765	27.3183	27.4028	27.4967	27.6326	27.384	27.2572	27.3227
P0DM40	FERM, ARHGEF and pleckstrin domain-containing protein 1	1	1	26.7649	26.4259	26.4696	25.9228	25.893	25.8111	25.451	25.5487	25.6608
F8VPU2	Fermitin family homolog 2	1	1
Q8CIB5	Fermitin family homolog 3	22	22	26.0042	25.9543	26.0879	25.3103	28.3931	28.5558	26.213	26.1572	28.2161
Q8K1B8	Ferrochelatase, mitochondrial	25	25	26.2631	26.3508	26.4007	27.0032	27.121	27.0481	27.147	27.0514	27.2035
P22315	Fetuin-B	7	7	24.078	22.3792	23.0226	21.8011	21.9172	21.7602	21.4987	23.9675	23.8757
Q6YJU1	FHF complex subunit H	1	1	19.6202	19.5136	19.5597	19.9265		20.1746
Q8CDM8	Fibrillin-1	2	2		16.9962
Q61554	Fibrinogen alpha chain	21	21	23.1879	22.9207	23.1954	23.9511	23.8319	23.7295	23.1969	23.5268	23.5292
E9PV24	Fibrinogen beta chain	46	46	31.1098	31.1077	31.108	32.9034	32.8414	32.8406	31.4461	31.3707	31.3648
Q8K0E8	Fibrinogen gamma chain	35	35	31.0038	30.8535	30.9792	32.4558	32.3951	32.4778	31.0959	31.0796	31.1443
Q3UER8	Fibroblast growth factor	32	32	31.5091	31.6642	31.6283	33.0815	33.1596	33.0944	31.9926	31.9522	31.9101
P61148	Fibroblast growth factor 1	5	5	23.8398	24.0599	23.9253	23.6007	23.1334	23.3831	23.9321	23.636	23.5875
Q925A3	Fibromodulin	1	1	17.6608	17.4803		16.872	17.4788	16.936	18.3173	18.4427	18.4419
P50608	Fibronectin	2	2	21.8086	21.0481	21.5822	19.5191			21.0683	21.7102
A0A087WR50	Fibronectin	93	5	23.4188	23.4826	23.7604	24.5752	25.0553	24.5872	22.5288	23.7058	23.0599
A0A087WSN6	Fibronectin type III domain-containing 1	106	18	31.9596	31.9862	32.2509	32.7511	32.7896	32.7359	32.3153	32.3455	32.3185
A0A6I8MWX0	Fibulin-1	11	11	21.1042	21.0193	20.9309	22.8419	22.8113	22.9196	21.1465	21.2025	20.1786
Q08879	Fibulin-7	6	6	23.7215	23.3763	23.2252	23.1055	22.4439	21.8133	21.7371	21.9407	21.7055
Q501P1	Ficolin-1	2	2	18.9914	19.1953	18.5134	20.4811	20.6765	17.6569	20.8304	20.9601	20.8386
O70165	Filamin-A	1	1
Q8BTM8	Filamin-B	103	98	30.2739	30.264	30.2737	29.931	29.932	30.0057	29.7895	29.7519	29.6781
Q80X90	Filamin-C	65	61	28.3987	28.3906	28.1768	26.995	27.0819	27.1162	27.4942	27.5666	27.6572
Q8VHX6	Flagellum-associated coiled-coil domain-containing protein 1	21	16	24.5543	24.4284	24.1805	24.9137	24.8095	23.26	24.273	24.4228	24.3439
A0A087WNN1	Flavin reductase (NADPH)	1	1
Q923D2	Flavin-containing monooxygenase 5	3	3	22.4252	22.2845	22.3063	21.9699	21.852	21.9872	23.0608	22.9959	22.6637
P97872	Focadhesin	17	17	26.2717	26.0055	25.7851	24.6727	24.6228	24.9933	26.2544	26.2893	26.2929
E9PYJ6	Follistatin-related protein 1	2	2	24.5243	23.2321	24.5736	24.8351	24.6997	24.6004	24.9827	25.0186	24.8728
Q62356	Forkhead box protein P1	6	6	24.3548	24.4886	24.2183	25.209	24.8488	24.9042	24.7246	24.3424	24.6562
H3BJM1	Forkhead-associated domain-containing protein 1	1	1	17.9447	18.0587	17.1306		15.7956	16.15
A6PWD2	Formimidoyltransferase-cyclodeaminase	1	1	25.8201	25.7809	25.7879	25.5569	25.4807	25.6387	25.0247	25.0552	24.8438
Q91XD4	Formin-binding protein 1	22	22	27.0855	26.9401	26.9219	26.9401	27.0774	27.0507	27.6316	27.6222	27.6708
A2AQ41	Formin-like protein 1	11	11	23.3004	23.6103	23.1591	22.7534	23.3081	22.9948	24.3952	23.5269	23.1102
A2AB60	Four and a half LIM domains protein 1	1	1
A2AEX6	Fractalkine	15	15	30.3496	30.4143	30.1466	29.9429	29.8978	30.0525	30.0377	29.9729	29.9481
A0A1D5RMK8	Fragile X mental retardation syndrome-related protein 1	1	1	23.251	22.9746	23.1183	21.7602	21.8324	21.9587	21.0213	21.452	21.2209
Q61584	Fructosamine-3-kinase	4	4	22.9448	22.2324	22.7588	21.1746	20.4552	20.872	21.8179	20.4658	21.3064
Q9ER35	Fructose-1,6-bisphosphatase 1	3	3	21.1735	21.4213	20.9755	18.55			20.6625	21.7883	21.5572
Q9QXD6	Fructose-1,6-bisphosphatase isozyme 2	7	7	25.2269	25.0687	25.2556	20.9504	21.274	21.1531	24.8005	24.6279	24.6629
P70695	Fructose-2,6-bisphosphatase TIGAR	5	5	20.8138	20.442	20.9866	21.4765	21.6262	21.7621		18.9698	21.8823
Q8BZA9	Fructose-bisphosphate aldolase A	3	3	23.0425	23.5806	23.8609	22.5023	22.8219	22.7797	22.6455	22.5933	22.753
P05064	Fructose-bisphosphate aldolase B	16	15	27.601	27.8196	27.6411	26.8653	26.7964	26.856	26.9194	26.8302	26.8774
Q91Y97	FSD1-like protein	17	16	28.0475	28.214	28.19	26.8929	27.1466	27.2883	27.7865	27.8252	27.8343
Q8BYN5	Fumarate hydratase, mitochondrial	1	1	16.751	16.4435	15.861		15.8149	15.5021	16.8688	16.5875	16.3496
P97807	FYN-binding protein 1	13	13	27.2253	27.3392	27.2697	25.1988	25.541	25.2486	26.4003	26.4738	26.4931
O35601	G-protein coupled receptor 39	5	5	20.3241	19.5326	19.5695		18.2378	16.0956	20.9874	21.036	21.0203
Q5U431	G7b alternative form	1	1
O35901	Galactokinase	5	5	26.535	26.659	26.4339	25.679	25.6497	25.8538	25.4905	25.5339	25.4682
Q9R0N0	Galectin-1	9	9	23.1148	23.8885	23.1981	23.8648	23.979	24.1004	24.1071	24.2373	24.0458
P16045	Galectin-9	2	2	20.2103	20.0701	20.2221	20.4982	20.1233	20.4118
G3X9T7	Gamma-adducin	5	5	22.6191	22.7171	22.6299	22.9944	22.7075	22.2689	23.9805	23.3951	23.3461
Q9QYB5	Gamma-aminobutyric acid receptor-associated protein-like 1	12	12	24.188	24.2223	24.4577	22.4096	21.6584	21.0235	23.8773	23.8239	23.6259
Q8R3R8	Gamma-butyrobetaine dioxygenase	3	3	25.7713	26.0445	25.7692	26.0967	26.0268	25.9085	26.4937	26.406	26.3473
Q924Y0	Gamma-glutamyl hydrolase	9	9		20.9717	19.9347	20.1533		22.446	20.6103	22.1442	22.5296
Q9Z0L8	Gamma-soluble NSF attachment protein	2	2	23.1401	19.6168	17.7725	21.0248	20.5884	20.5352	24.4925	18.5484	24.3262
Q9CWZ7	Gasdermin-A	6	6	20.7212	21.4817	20.1045	20.9659	20.9452	19.7103	19.4137	20.948	19.5224
Q9EST1	Gasdermin-D	3	3	23.6453	23.1064	23.6861	23.8131	23.9527	24.192	20.2339	22.0103	21.7374
Q9D8T2	Gbp6 protein	1	1	25.5004	25.4316	25.4459	25.0842	25.1652	25.2353	24.7919	24.7491	24.923
Q91Z40	GDH/6PGL endoplasmic bifunctional protein	20	18	25.8541	25.7131	25.5772	24.9505	25.0764	25.2122	25.7537	25.6861	25.5789
Q8CFX1	GDP-L-fucose synthase	1	1		18.8378	18.4634				19.1548	19.1802
P23591	GDP-mannose 4,6 dehydratase	8	8	23.0769	22.7887	23.088	20.6117	21.355	21.4796	22.7691	23.1314	22.9799
Q8K0C9	Gelsolin	2	2	19.5558	19.0401	19.9416
P13020	General transcription factor IIH subunit 2	51	46	33.3881	33.4665	33.3899	34.0344	34.0667	34.0395	33.8256	33.8668	33.7648
Q9JIB4	General vesicular transport factor p115	1	1		14.8841	14.8421
Q9Z1Z0	Geranylgeranyl pyrophosphate synthase	10	10	25.5697	25.5908	25.4638	26.2999	25.9406	26.0175	26.6389	26.5139	26.5616
Q9WTN0	Glia-derived nexin	4	4	22.4085	22.4948	22.7437	22.8691	23.1063	23.2675	24.1722	24.2322	24.076
Q07235	Glucokinase regulatory protein	8	7	24.0197	25.3022	24.5961	24.0301	24.2074	23.6295	25.612	25.6186	25.7744
A0A0J9YUI8	Glucosamine 6-phosphate N-acetyltransferase	1	1							19.7809	19.4825
A0A2I3BQY4	Glucose-6-phosphate 1-dehydrogenase X	1	1	20.7194	19.9876	20.7902	19.3954	20.2302	20.2396
Q00612	Glucose-6-phosphate isomerase	20	20	27.2795	27.3533	27.1472	27.1431	27.2964	27.2318	27.7023	27.6148	27.6867
P06745	Glutamate carboxypeptidase 2	16	16	27.9991	27.9058	27.9524	27.4433	27.4777	27.394	27.8155	27.6802	27.7397
O35409	Glutamate dehydrogenase 1, mitochondrial	1	1	16.5217	16.5662	15.7176		14.3709	14.2458	16.2155	16.1533	16.2486
P26443	Glutamate--cysteine ligase catalytic subunit	24	24	26.5329	26.6408	26.5102	24.2467	24.4693	24.3933	24.4166	24.4907	24.6785
P97494	Glutamate--cysteine ligase regulatory subunit	1	1
O09172	Glutaminase kidney isoform, mitochondrial	7	7	24.7318	24.89	24.6002	23.702	24.0925	23.5695	24.5821	24.3902	24.2749
D3Z7P3	Glutamine amidotransferase-like class 1 domain-containing protein 3A, mitochondrial	1	1
Q9D172	Glutamine synthetase	8	8	26.1427	26.2964	25.6853	22.4263	22.944	22.8458	22.9204	22.9895	23.3373
P15105	Glutamine--fructose-6-phosphate aminotransferase [isomerizing] 1	5	5	22.5655	22.6476	22.2738	21.0361	20.4407	21.3374	22.9	21.8548	22.1807
P47856	Glutamine--tRNA ligase	10	10	23.7427	23.6673	22.6123	22.9369	22.2249	22.4472	23.5583	22.9381	23.3304
Q8BML9	Glutaminyl-peptide cyclotransferase	22	22	25.7389	25.7463	25.4984	25.7272	25.7829	25.9161	25.8184	26.1986	26.1298
A0A0R4J0G6	Glutamyl aminopeptidase	5	5	21.4399	21.1999	20.7406	21.7542	22.1434	22.4848	22.6948	22.4872	22.5831
P16406	Glutaredoxin-3	1	1	16.7029	16.1168			14.4869
Q9CQM9	Glutaryl-CoA dehydrogenase, mitochondrial	2	2	18.5927						18.9522	19.4699
A0A0A0MQ68	Glutathione peroxidase 1	14	14	24.5721	24.4687	24.9693	21.936	22.1023	22.6533	19.803	21.6969	17.8316
P11352	Glutathione peroxidase 3	14	14	25.6055	25.4739	25.6604	25.4116	25.6148	25.6017	26.1947	25.8599	26.05
P46412	Glutathione S-transferase	7	7	26.1235	26.1053	26.3374	26.8508	26.6367	26.9672	26.6229	26.486	26.3805
P13745	Glutathione S-transferase A1	3	1	20.7806	20.6998	21.1597	21.4733	21.3448	21.6014	21.2155	21.1795	21.3623
P30115	Glutathione S-transferase A3	11	8	26.5572	27.0017	26.5986	26.5662	26.4968	26.5394	26.7964	26.8078	26.7833
P24472	Glutathione S-transferase A4	4	2	20.6644	20.2544	20.9783
Q9DCM2	Glutathione S-transferase kappa 1	9	9	23.8568	24.6459	24.4029	24.0875	24.3973	24.2802	24.1104	24.2821	24.2821
O89112	Glutathione S-transferase LANCL1	7	7	29.4706	29.3943	28.9193	28.7605	28.6535	28.4634	25.6063	25.8525	25.5033
P10649	Glutathione S-transferase Mu 1	9	8	23.7335	24.1467	24.3529	22.6973	22.964	23.1965	24.256	24.3635	24.5794
P48774	Glutathione S-transferase Mu 5	2	1	19.9539	19.4792	20.2159	20.1898		19.9944			19.634
D3YX76	Glutathione S-transferase P 1	3	2	19.3419	19.1777	19.9786	19.7036	19.2285	18.5958	19.0395	20.0905	20.1488
P19157	Glutathione S-transferase theta-1	7	7	25.9474	26.2357	26.2583	26.512	26.7606	26.474	26.3099	26.657	26.6823
Q64471	Glutathione S-transferase theta-2	15	15	28.2296	28.1297	28.2987	27.5224	27.6852	27.6279	28.2429	29.3129	28.4795
Q61133	Glutathione S-transferase theta-3	6	5	23.6571	24.0226	24.2095		21.004	21.4331	20.4986	23.6447	20.8387
Q99L20	Glyceraldehyde-3-phosphate dehydrogenase	10	9	25.9651	25.9572	26.1079	24.5079	24.6046	25.2802	25.9316	26.2629	26.3327
A0A0A0MQF6	Glycerate kinase	26	24	33.1155	33.1334	33.2759	32.5003	32.5748	32.5431	33.0276	33.1314	33.1093
Q8QZY2	Glycerol kinase	5	5	18.2916	19.3163	18.9828	18.6926	18.8157	18.7511		18.5191
Q64516	Glycerol-3-phosphate dehydrogenase [NAD(+)], cytoplasmic	1	1
P13707	Glycerol-3-phosphate dehydrogenase 1-like protein	17	17	29.2451	29.1951	29.1697	29.1866	28.9664	28.9866	29.5021	29.5689	29.5014
Q3ULJ0	Glycerol-3-phosphate dehydrogenase, mitochondrial	17	17	25.9267	25.9325	25.6692	25.3286	25.3667	25.4181	26.0885	26.1266	26.1556
Q64521	Glycine dehydrogenase (decarboxylating), mitochondrial	1	1	20.8938	21.0914	20.9924	24.0741			24.2741	24.5985
Q91W43	Glycine N-acyltransferase	1	1	20.5988	20.6748	20.5107	20.4545	20.4294	20.3919	20.6787	20.4242	20.2077
Q91XE0	Glycine N-acyltransferase-like protein	4	4	20.3592	20.2465	18.9434	16.6808	17.3412	16.7325	16.3508	16.4742	16.0755
Q5FW57	Glycine N-methyltransferase	1	1		16.005	15.4336	15.3502
Q9QXF8	Glycine--tRNA ligase	12	12	27.0156	27.2623	27.1985	24.3551	24.1895	24.2803	26.7652	26.8923	26.9573
Q9CZD3	Glycogen [starch] synthase, liver	16	16	26.1989	26.3252	26.1965	26.3892	26.2191	26.3414	26.505	26.7008	26.5616
Q8VCB3	Glycogen phosphorylase, brain form	8	8	24.2528	25.3365	24.822	24.4325	25.0336	25.1301	25.264	26.1213	25.4574
Q8CI94	Glycogen phosphorylase, liver form	23	18	28.3648	28.281	28.3598	28.8293	28.8252	28.9254	28.4335	28.6615	28.7346
Q9ET01	Glycogen phosphorylase, muscle form	28	24	27.0855	27.0095	27.2367	25.4257	25.6392	25.5645	26.9928	27.0571	27.1482
Q9WUB3	Glycogen synthase kinase-3 alpha	37	32	28.4473	28.5597	28.7888	27.7442	27.8259	27.8361	28.0319	28.132	28.0867
Q2NL51	Glycogen synthase kinase-3 beta	6	3
E9QAQ5	Glycolipid transfer protein	9	6	22.4089	22.7478	22.2815	22.2668	22.5718	22.1428	23.4191	23.0106	23.0417
Q9JL62	Glycosyl-phosphatidylinositol-specific phospholipase D	3	3	23.5427	23.2907	23.5378	22.8516	21.8702	22.6755	23.0341	22.5525	22.9657
Q8VCU2	Glycosyltransferase-like domain-containing protein 1 (Fragment)	20	20	26.6609	26.5382	26.7769	28.6051	28.5544	28.6874	27.9681	28.0622	27.8834
A0A0A0MQK2	Glycylpeptide N-tetradecanoyltransferase 1	1	1
O70310	Glyoxylate reductase/hydroxypyruvate reductase	11	11	26.0542	26.2798	25.9778	25.7296	25.9081	26.2243	26.4011	26.0885	26.2796
Q91Z53	Glypican-3	7	7	24.0456	24.2075	23.6767	22.4065	22.4167	22.693	22.6023	23.0341	22.8518
Q8CFZ4	GMP reductase 1	1	1	17.4752	17.754	17.2019		16.136	15.6301		17.1592	16.9682
Q9DCZ1	GMP synthase [glutamine-hydrolyzing]	8	8	24.4745	24.2563	24.3004	24.1849	23.995	23.9055	24.9754	24.927	24.791
Q3THK7	Golgi apparatus protein 1	9	9	23.6628	24.0357	23.7414	23.4155	23.215	22.4654	23.786	23.7804	24.0934
Q61543	Golgi autoantigen, golgin subfamily b, macrogolgin 1	15	15	25.2964	25.171	25.0023	23.3067	23.484	23.1927	22.5656	22.3691	23.5378
E9QAH1	Golgi integral membrane protein 4	2	2	16.3067	15.9078	15.8058
Q8BXA1	Golgi membrane protein 1	5	5	21.6764	21.4712	21.1282	21.204	21.1715	20.9393	22.8831	22.1232	22.7186
Q91XA2	Golgi phosphoprotein 3-like (Fragment)	1	1
H3BJ82	Golgi to ER traffic protein 4 homolog (Fragment)	1	1							17.0898	17.4751
D3Z4J5	Golgi-associated plant pathogenesis-related protein 1	1	1	19.6345	19.4721					21.0244	21.0428	21.2651
Q9CYL5	Golgi-resident adenosine 3',5'-bisphosphate 3'-phosphatase	2	2								20.4611
Q80V26	Golgi-specific brefeldin A-resistance factor 1	2	2	17.7382	17.6947	17.2785	19.1397	19.3382	18.9945
Q6DFZ1	Golgin subfamily A member 2	2	2	19.8786	19.568	19.8466		20.2538		21.1744	20.4106	20.0821
A0A6I8MX07	Golgin-45	1	1
Q8R2X8	GRIP1-associated protein 1	1	1							19.3538	19.2676	20.5676
Q8VD04	Growth arrest-specific protein 7	3	3	19.4672	19.3968	18.9599	18.8	19.2871		20.1778	19.9719	19.7104
F6QB26	Growth factor receptor-bound protein 2	2	2			15.3518	14.5422	14.6081	14.6127
Q60631	Growth/differentiation factor 8	1	1
O08689	GTP cyclohydrolase 1	7	7	22.4184	22.4487	22.9269	23.1817	26.759	26.7347	27.209	27.0856	26.9423
Q05915	GTP-binding nuclear protein Ran	1	1
P62827	GTP-binding protein	18	18	28.7243	28.6014	28.7427	28.5158	28.6087	28.6814	28.9445	29.135	29.0914
O08582	GTP-binding protein 1	7	7		21.6735	21.8715	19.9225	19.9596	20.3601	21.7938	21.5121	21.8053
Q61635	GTP-binding protein SAR1a	17	17	26.2714	26.7354	26.1293	25.601	25.8239	25.9247	26.3642	26.411	26.4674
Q99JZ4	GTP-binding protein SAR1b	4	3	22.5653	22.5778	22.6382	20.6836	20.8487	20.7664	21.1757	21.0713	21.0894
Q9CQC9	GTP:AMP phosphotransferase AK3, mitochondrial	3	2	22.2217	21.9174	21.9817	22.1284	21.4692	22.2582	23.472	23.5856	23.5941
Q9WTP7	GTPase IMAP family member 4	5	5	22.795	22.7045	21.8525		21.5019
Q99JY3	GTPase KRas	9	9	24.3483	24.4489	24.3967	23.4048	22.9874	23.7554	24.6514	24.5662	24.509
P32883	GTPase-activating protein and VPS9 domain-containing protein 1	4	4	23.4077	23.8679	23.3657	23.352	23.7152	23.1691	23.9954	24.0455	24.0309
Q6PAR5	GTPase, IMAP family member 7	15	15	23.4606	23.3624	23.3413	23.282	23.4851	23.4463	24.0896	24.3752	24.2107
Q8R379	Guanine nucleotide exchange factor VAV2	3	3	17.9235	17.7971	16.7424	15.6073	16.1923	16.6147	18.3509	17.7276	18.2549
Q60992	Guanine nucleotide-binding protein G(i) subunit alpha-2	1	1	17.9583	17.8999	16.9738	17.8901	17.6978		19.1138	19.6245
P08752	Guanine nucleotide-binding protein G(i) subunit alpha-3	13	10	26.5606	26.6228	26.6751	26.1437	26.0151	26.1351	25.9194	26.2268	25.98
Q9DC51	Guanine nucleotide-binding protein G(I)/G(S)/G(T) subunit beta-1	7	3	20.5849	20.4113	20.1325				19.7049	20.0209	19.6262
P62874	Guanine nucleotide-binding protein G(I)/G(S)/G(T) subunit beta-2	9	5	26.5742	26.5759	26.45	25.3439	25.0485	25.269	25.6627	25.471	25.5087
E9QKR0	Guanine nucleotide-binding protein G(o) subunit alpha	8	4	22.235	22.6361	22.6592		20.265	20.3814	22.995	22.9044	23.2119
P18872	Guanine nucleotide-binding protein G(s) subunit alpha isoforms XLas	3	1
Q6R0H7	Guanine nucleotide-binding protein subunit alpha-11	7	6	23.7585	23.7026	23.7388	24.118	24.2497	24.1828	23.7424	24.0635	23.8285
P21278	Guanine nucleotide-binding protein subunit alpha-13	6	6	23.1483	23.2426	23.3349	20.9582	22.5876	21.3721	22.9484	22.9709	22.5695
P27601	Guanine nucleotide-binding protein subunit gamma	3	2		19.6866	19.4006
A0A0N4SW28	Guanine nucleotide-binding protein-like 1	1	1	19.2706	22.3528	21.6065
P36916	Guanylate binding protein 4.1	4	4	21.5024	20.669		20.3546		17.7934	21.5533	20.8994	21.4493
A4UUI3	Guanylate-binding protein 1	6	3	21.38	21.7078	21.8705	21.9157	22.3319	21.7259	20.75	20.9054	20.9329
Q01514	Guanylate-binding protein 2	12	8	23.2691	23.6507	23.7562	23.3689	23.5227	23.3638	23.6866	23.5125	24.0491
Q9Z0E6	Guanylate-binding protein 4	15	11	27.2749	27.3447	27.0821	26.5674	26.6052	26.5766	26.813	27.1481	26.7655
Q61107	Guanylate-binding protein 8	4	2	22.4238	23.1912	23.0177	23.1483	22.5408	22.4338	22.4678	22.5062	22.1413
Q2V6D6	H-2 class I histocompatibility antigen, D-B alpha chain	4	1							20.1114	19.9502	19.4475
P01899	H-2 class I histocompatibility antigen, D-D alpha chain	8	4	21.4904		21.3841				21.8725	21.8757	21.2271
P01900	H-2 class I histocompatibility antigen, K-D alpha chain	12	8	24.9951	24.8756	25.0317	24.1294	24.041	23.9999	23.7639	24.6695	24.4521
P01902	H-2 class I histocompatibility antigen, Q10 alpha chain	9	6	23.9329	23.6982	23.9216	21.5164	22.1068	22.2222	22.2542	22.2026	22.2496
P01898	H-2 class II histocompatibility antigen gamma chain	7	5	22.511	23.0856	22.5831	20.9334	21.2344	20.7719	21.3213	21.2925	21.2142
P04441	H-2 class II histocompatibility antigen, A-D beta chain	2	2
P01921	H/ACA ribonucleoprotein complex subunit 2	3	3
Q9CRB2	H/ACA ribonucleoprotein complex subunit DKC1	2	2	18.4877	19.454	17.5334			17.496	18.6796	17.9735	18.6665
Q9ESX5	H2.0-like homeobox protein	3	3	22.0588	21.9737	21.5739	21.1809	21.2324	21.5289	19.2144	18.522	19.2162
Q61670	Haloacid dehalogenase-like hydrolase domain-containing protein 2	1	1	20.5316	20.9614	21.3544	20.0423	20.0245	19.5975	21.9093	22.5373	22.4592
Q3UGR5	Haptoglobin	1	1
Q61646	HBS1-like protein	9	9	22.4465	22.7751	22.7995	22.3689	22.2044	22.9874	24.2856	24.1768	24.0239
Q69ZS7	HCLS1-binding protein 3 (Fragment)	5	5	23.6887	23.5973	23.394	24.3976	24.477	24.4114	24.9159	24.6261	24.5627
A0A1W2P6R8	HEAT repeat-containing 4	2	2	20.1004		19.9913
E9Q357	HEAT repeat-containing protein 5B	1	1	19.9088		19.7038			20.0471
Q8C547	HEAT repeat-containing protein 6	1	1	20.6662	20.748	20.1009	22.1453	22.0517	22.4813	23.4326	23.4983	23.5025
Q6P1G0	Heat shock 70 kDa protein 1-like	4	4	23.1367	22.8445	23.0989	22.8644	22.3969	22.8334	22.9518	22.5795	22.72
P16627	Heat shock 70 kDa protein 12A	5	1			21.652
Q8K0U4	Heat shock 70 kDa protein 12B	15	13	26.9832	26.5881	26.5454	25.6966	25.8136	25.7134	25.8446	25.7671	26.0056
Q9CZJ2	Heat shock 70 kDa protein 14	3	1	15.1379	14.929	13.8574	14.2446	14.3269
Q99M31	Heat shock 70 kDa protein 1A	1	1	16.4464	17.1652	17.0347		15.9972	16.0327	17.9063	17.9008	17.552
Q61696	Heat shock 70 kDa protein 4	11	7	23.8004	23.8902	24.1868	23.8132	24.1381	22.9552	23.865	24.0777	22.4948
Q61316	Heat shock 70 kDa protein 4L	33	32	27.8769	27.8346	28.0728	25.9579	26.0315	25.8521	27.0491	27.0055	27.0899
P48722	Heat shock cognate 71 kDa protein	8	7	24.9468	25.1257	24.8807	26.4888	26.2959	26.1636	25.4744	24.9807	25.0229
P63017	Heat shock factor protein 1	24	17	27.6775	27.6596	27.7789	27.8455	27.6733	27.467	27.7548	27.8824	28.0349
P38532	Heat shock protein 105 kDa	1	1	25.1992	22.5415	23.7367	24.9596	24.4551	23.6324	23.0303	22.6777	22.1805
Q61699	Heat shock protein 75 kDa, mitochondrial	17	16	24.9225	24.971	24.9192	24.0997	24.8109	24.2591	25.3981	24.6379	25.192
Q9CQN1	Heat shock protein beta-1	7	6	20.775	20.4391	21.0257			19.5185	19.466	21.7036
P14602	Heat shock protein beta-6	7	7	25.4036	25.416	25.466	24.0597	24.0699	24.0896	24.5799	24.7024	24.3827
Q5EBG6	Heat shock protein HSP 90-alpha	1	1		22.8641	18.8321			16.3424		17.8832	17.8777
P07901	Heat shock protein HSP 90-beta	30	18	27.9518	27.7824	27.7394	27.3382	27.4318	27.4786	27.6169	27.6088	27.499
P11499	Heat shock-related 70 kDa protein 2	36	23	30.6878	30.652	30.748	30.4891	30.5666	30.5098	30.5547	30.5822	30.5166
P17156	Hematopoietic lineage cell-specific protein	11	5	22.6959	22.6192	23.1634	22.1933	21.5138	21.4182	22.3265	22.6409	21.1469
P49710	Hemoglobin subunit alpha	9	9	24.4308	24.8227	24.4687	23.5576	23.5086	23.8532	25.0549	24.9409	25.1331
P01942	Hemoglobin subunit beta-1	17	6	35.9897	36.0603	36.2275	35.5895	35.6463	35.6071	35.4976	35.3964	35.4778
P02088	Hemoglobin subunit beta-2	18	11	36.0782	36.1128	35.937	35.8673	35.5211	35.6573	35.6274	35.7142	35.8458
P02089	Hemoglobin subunit epsilon-Y2	18	11	34.0844	34.1713	34.2157	33.7712	34.1285	33.9298	33.3445	33.5296	33.2803
P02104	Hemopexin	6	5	27.0168	27.3113	27.1511	26.3061	25.8951	24.7694	25.8968	25.9369	25.8207
Q91X72	Heparanase	20	20	27.0114	27.235	28.6781	29.971	30.1939	30.1661	28.1646	28.267	28.4173
D3Z3C3	Heparin cofactor 2	1	1							19.9679	19.5208	19.3287
P49182	Hepatic triacylglycerol lipase	16	16	27.4697	27.4745	27.2912	26.4526	26.3233	26.5532	27.2409	27.2404	27.189
P27656	Hepatocyte growth factor activator	14	14	25.7709	25.7757	25.6033	26.3936	26.6065	26.3375	26.0564	25.7957	25.9955
Q9R098	Hepatocyte growth factor receptor	8	8	22.0489	21.318	21.7693	22.3036	22.2679	22.633	22.5923	22.2436	21.8288
P16056	Hepatocyte growth factor-like protein	1	1	17.3087	18.8479	17.771
E0CXN0	Hepatocyte growth factor-regulated tyrosine kinase substrate	28	28	28.4151	28.2486	28.578	28.7927	28.8828	28.8113	28.6187	28.6464	28.6918
Q99LI8	Hepatoma-derived growth factor	3	3	21.169	22.2389	22.5376					20.891	24.2619
P51859	Hepatoma-derived growth factor-related protein 2	13	13	27.4693	27.3523	27.3898	27.0077	26.9251	26.7644	27.6703	27.5544	27.4239
Q3UMU9	Hepatoma-derived growth factor-related protein 3	3	3	20.9074	20.9446	20.5261	20.3218	21.1674	20.3054	20.9398	20.8409	20.2289
Q9JMG7	Hermansky-Pudlak syndrome 5 protein homolog	4	4	24.8595	24.9577	24.8707	23.8693	23.8739	24.1256	24.3551	24.3044	24.5374
P59438	Heterochromatin protein 1-binding protein 3	1	1
Q3TEA8	Heterogeneous nuclear ribonucleoprotein A/B	6	6	21.5203	21.7985	21.5905	20.4601	20.67	20.3848	22.4854	22.3139	22.3015
Q99020	Heterogeneous nuclear ribonucleoprotein A0	9	8	27.2359	27.1654	27.1852	26.3736	26.5494	26.6068	27.2407	27.3493	27.3688
Q9CX86	Heterogeneous nuclear ribonucleoprotein A1	5	5	25.4178	25.7783	25.1826	25.1225	25.1727	24.9583	24.7703	24.2368	24.3351
P49312	Heterogeneous nuclear ribonucleoprotein A3	10	10	25.7405	25.9922	26.1506	25.4669	25.4737	25.5706	25.966	26.0835	26.021
Q8BG05	Heterogeneous nuclear ribonucleoprotein D-like	17	17	27.545	27.4403	27.7885	26.6247	26.6829	27.0002	27.5867	27.9367	27.7771
D3YTQ3	Heterogeneous nuclear ribonucleoprotein D0	7	5	23.2751	23.1767	23.551	23.4943	23.956	23.9167	23.8559	24.2196	24.0303
Q60668	Heterogeneous nuclear ribonucleoprotein H	8	6	26.9878	26.8451	27.6153	27.0899	26.4898	27.1205	27.522	27.8112	27.8716
Q8C2Q7	Heterogeneous nuclear ribonucleoprotein K	9	9	24.0931	23.9726	23.9146	22.8901	22.7921	22.7722	23.5308	23.1931	23.0799
B2M1R6	Heterogeneous nuclear ribonucleoprotein L (Fragment)	18	18	27.72	27.6744	27.6603	26.567	26.8472	26.8608	27.6848	27.6941	27.6941
G5E924	Heterogeneous nuclear ribonucleoprotein L-like	19	19	25.8304	25.922	25.7067	24.978	25.0054	24.7949	26.2329	26.2398	26.2591
Q921F4	Heterogeneous nuclear ribonucleoprotein M	8	8	23.5342	23.8957	23.3424	24.9833	25.1896	25.2688	26.8461	26.9472	26.8066
Q9D0E1	Heterogeneous nuclear ribonucleoprotein Q	20	20	25.9397	25.6648	25.7275	25.1726	25.3959	24.9407	26.0066	26.169	26.0068
Q7TMK9	Heterogeneous nuclear ribonucleoprotein R	19	13	27.231	27.1163	27.2595	26.8351	26.8897	26.9271	27.1697	27.188	27.4133
Q8VHM5	Heterogeneous nuclear ribonucleoprotein U	14	8	24.2908	25.1201	24.6968	24.41	24.2348	24.3572	24.3746	24.4228	24.5154
Q8VEK3	Heterogeneous nuclear ribonucleoprotein U-like protein 1	19	18	26.8633	26.8993	27.0756	27.2025	26.9126	27.3165	27.5937	27.4964	27.6009
Q8VDM6	Heterogeneous nuclear ribonucleoprotein U-like protein 2	8	7	25.2257	23.5316	24.8274	24.2115	23.4535	24.1562	24.2247	24.3966	24.2096
Q00PI9	Heterogeneous nuclear ribonucleoproteins A2/B1	7	7	22.4971	23.1599	22.7629	21.6806	21.9849	21.0594	20.9699	21.3152	21.5643
O88569	Heterogeneous nuclear ribonucleoproteins C1/C2	16	16	27.0506	26.9731	27.1063	25.9343	26.0879	25.9172	26.9533	27.0061	27.0808
Q9Z204	Hexokinase-1	9	9	24.8114	24.6674	25.2196	24.4662	24.3148	24.1362	24.7536	25.1448	25.4025
P17710	Hexokinase-2	11	8	21.3865	22.681	22.8969	26.7151	27.0243	26.8022	24.2274	23.799	24.1841
O08528	High affinity immunoglobulin epsilon receptor subunit gamma	12	9	26.7681	26.3786	26.3326	26.5523	26.6333	26.5884	26.1423	26.264	26.336
P20491	High mobility group nucleosome-binding domain-containing protein 3	1	1		20.9345	20.6584
Q9DCB1	High mobility group protein B1	1	1	17.9755	17.9103	16.6313	15.1827	15.6704	15.839
P63158	High mobility group protein B2	14	11	29.5157	29.0295	28.9304	27.8303	27.8222	27.891	28.7223	28.6488	28.9783
P30681	High mobility group protein B3	8	5	25.4352	25.7783	25.9815	25.0338	24.8446	24.9424	25.9025	25.812	25.8052
O54879	High mobility group protein HMG-I/HMG-Y	1	1
A0A338P6D0	Hippocalcin-like protein 1	1	1
P62748	Histidine ammonia-lyase	5	2	21.6623	21.5353	21.3343		20.6896		22.087	22.5036	22.5806
P35492	Histidine triad nucleotide-binding protein 1	4	4	21.4378	21.6491	20.9034	22.8718	22.9615	23.1916	21.6739	22.0821	22.1456
P70349	Histidine triad nucleotide-binding protein 2, mitochondrial	3	3	24.6197	24.7058	24.4703	23.7983	21.5582	21.5135	24.2404	24.2931	22.7048
Q9D0S9	Histidine triad nucleotide-binding protein 3 (Fragment)	3	3	19.1348	19.2722	19.5222	21.1282	20.9581	20.2518
E9Q7F8	Histidine--tRNA ligase, cytoplasmic	1	1	19.4358
Q61035	Histidine-rich glycoprotein	20	20	26.0093	25.9696	26.0035	25.8149	25.7209	25.7345	25.8281	26.9837	25.6653
Q9ESB3	Histocompatibility 2, Q region locus 4	33	33	33.2499	32.9293	33.0319	33.883	33.8026	33.9537	33.5934	33.6435	33.6393
Q8HWB2	Histone deacetylase 2	12	6	26.8882	26.7744	26.7361	27.0671	27.197	27.1761	26.8898	26.8983	26.8055
P70288	Histone deacetylase 6	8	8	22.3566	22.7074	22.4375	21.3478	21.4865	21.0788	22.1163	22.0495	21.9279
Q9Z2V5	Histone H1.0	1	1	18.8188	18.9287	18.6421	17.9814	17.4606		19.5104	19.4403	19.3348
P10922	Histone H1.1	3	3	23.5795	23.3926	23.6823	24.2621	24.3307	24.1629	25.1092	25.0677	25.2102
P43275	Histone H1.2	5	3	23.577	23.7519	23.3556	24.0788	23.819	23.8943	24.1664	23.9997	23.9544
P15864	Histone H1.3	6	2	28.306	28.2384	28.0983	27.0424	27.0853	27.176	28.0155	27.8388	27.8541
P43277	Histone H1.4	5	1	23.0031	23.1173	22.4495				23.1044	22.9273	22.5383
P43274	Histone H1.5	5	2	23.5486	23.2654	24.3531	21.4885	21.2591	21.5447	24.7068	24.5064	24.538
P43276	Histone H2A type 2-C	2	2	22.6402	22.5922	22.8957	20.7817		19.9313	24.0162	24.002	23.8695
Q64523	Histone H2B type 2-B	4	4	20.5931	19.7152	20.9353	20.5874	20.4375	20.4679	22.6398	22.5869	22.6092
Q64525	Histone H3.3	2	2	25.3318	25.1588	25.6141	24.9023	24.9436	25.1712	25.7934	25.9762	26.0529
P84244	Histone H4	2	2	21.5447	21.7832	21.6475	21.0759	20.5665	20.5388	21.9058	21.8203	21.5527
P62806	Histone PARylation factor 1	2	2	23.1803	23.0385	23.4101	23.6491	23.6945	23.5296	23.0562	23.6657	23.5152
Q8CFE2	Histone-binding protein RBBP4	1	1			19.0314				20.3862	20.4022	19.9487
Q60972	Histone-binding protein RBBP7	5	1
Q60973	Histone-lysine N-methyltransferase PRDM16	7	3	26.863	26.4911	26.7817	26.3225	26.2998	26.2686	26.2911	26.1565	26.2539
A2A930	Histone-lysine N-methyltransferase Smyd1	1	1	24.1254	24.0794	24.4557	23.4728	23.6125	23.6654	25.1629	25.2766	25.2765
P97443	Histone-lysine N-methyltransferase, H3 lysine-36-specific	9	9	23.8652	23.6247	23.8635	24.062	24.0546	24.0155	24.5295	24.8527	24.7788
A0A286YE36	HIV Tat-specific factor 1 homolog	1	1
Q8BGC0	Homocysteine-responsive endoplasmic reticulum-resident ubiquitin-like domain member 1 protein	1	1
Q9JJK5	Homogentisate 1,2-dioxygenase	1	1	18.6793	16.3245		16.1957	19.0859	19.709	19.8068		20.3333
O09173	Hormone-sensitive lipase	6	6	22.5224	22.4533	22.5339	17.6528	17.5223	22.28	22.4384	22.6593	22.3525
P54310	Host cell factor 1	5	5	20.642	20.372	20.482	20.3035	20.4122	20.9796	21.6674	21.3897	22.4082
Q61191	Hsc70-interacting protein	6	6	22.7239	22.9824	22.983	23.09	23.2176	23.3235	23.2629	23.1053	23.3166
F8WJK8	Hsp90 co-chaperone Cdc37	11	11	27.7598	27.8599	27.9687	26.5229	26.7956	26.807	27.4265	27.4969	27.7477
Q61081	Huntingtin-interacting protein 1 (Fragment)	11	11	26.3528	26.2329	26.3103	25.9392	26.0992	25.9709	26.1638	26.3095	26.4302
A0A0J9YUA3	Huntingtin-interacting protein 1-related protein	1	1
Q9JKY5	Hyaluronan-binding protein 2	3	3	20.9052	21.0344	20.4341	19.4757	19.4985	19.4267	20.3459	19.8585	20.1439
Q8K0D2	Hyccin	21	21	26.6531	26.5647	26.394	27.5048	27.3201	27.316	26.8647	26.6157	26.6778
Q6P9N1	Hydrocephalus-inducing protein	1	1	24.3076	24.4547	24.5244	24.7359	24.5578	24.4535	24.1217	24.3713	24.0594
Q80W93	Hydroxyacid oxidase 1	1	1	24.2444	24.4402	24.3716	20.7008	23.4287	22.1252
Q9WU19	Hydroxyacid-oxoacid transhydrogenase, mitochondrial	2	2	19.3315	20.3661				21.0562	20.6537		20.0957
Q8R0N6	Hydroxyacyl-coenzyme A dehydrogenase, mitochondrial	1	1	18.353		18.1414
Q61425	Hydroxymethylglutaryl-CoA lyase, mitochondrial	10	10	24.0083	24.8055	24.5287	22.6292	22.4979	22.9997	21.083	21.2607	21.2713
P38060	Hydroxymethylglutaryl-CoA synthase, cytoplasmic	8	8	23.0732	22.6263	23.2019	23.9328	22.4911	22.1589	21.7763	20.8849	22.1441
Q8JZK9	Hydroxymethylglutaryl-CoA synthase, mitochondrial	9	8	22.4407	22.8663	22.5525	21.8431	21.9286	22.1708	22.2924	22.0152	22.033
P54869	Hydroxysteroid dehydrogenase-like protein 2	18	17	29.2721	29.0373	29.2167	29.0035	29.0012	29.0966	28.3357	28.5774	28.637
Q2TPA8	Hypoxanthine-guanine phosphoribosyltransferase	5	5	23.8886	23.8523	24.0448	26.1053	26.2915	26.2305	23.6527	23.6534	23.8373
P00493	Hypoxia up-regulated protein 1	2	2	20.6734	21.2713	19.8199			20.9769	21.2288	21.8065	21.6176
Q9JKR6	I-kappa-B kinase	16	16	25.5235	25.6176	25.5973	24.7838	24.8912	25.056	25.026	24.8832	24.9129
E9Q605	Ig alpha chain C region	1	1
P01878	Ig gamma-1 chain C region secreted form (Fragment)	5	5	22.1674	21.6363	22.0766	23.486	23.581	22.4315	21.508	21.4537	23.0834
A0A0A6YWR2	Ig gamma-2A chain C region, A allele	7	7	25.7306	26.0045	25.97	26.4204	26.4625	26.6221	26.4592	26.2638	26.2205
P01863	Ig gamma-2B chain C region	10	9	28.1834	28.0231	28.3667	29.379	29.806	29.4731	28.9379	29.0309	29.0433
P01867	Ig gamma-3 chain C region	13	1	27.1229	26.9214	24.9989	28.9268	28.9921	29.4223	28.0137	28.2539	28.1628
P03987	Ig heavy chain V region	12	12	28.9835	29.0142	29.1772	29.7327	30.2735	30.0312	28.9915	29.1877	29.2021
P01750	Ig heavy chain V region 102	1	1
P18531	Ig heavy chain V region 3-6	2	2	22.8014	23.0801	22.8092	23.6399	23.5079	23.5445	23.2079	22.897	22.7673
P18526	Ig heavy chain V region 345	4	1				20.9005	21.5813	21.3987	21.2863		21.7537
P01823	Ig heavy chain V region 36-60	1	1	22.7672	22.474	22.5134	23.5261	23.1209	23.4177
P18528	Ig heavy chain V region 6.96	3	1	22.5333	22.4002	22.1028	23.4616	23.3442	23.1502	22.5687	22.6679	22.741
P18527	Ig heavy chain V region 914	5	2	24.8101	24.7074	26.0095	27.4244	27.3584	27.2391	27.1395	26.9172	26.9283
P01791	Ig heavy chain V region HPCM6	5	5	24.5788	24.7268	24.3958	24.9036	24.1875	25.0084	23.9171	23.8723	23.3612
P01741	Ig heavy chain V region TEPC 1017	1	1	20.9941	21.1501	21.3262	23.2976	23.0933	23.146	22.5173	22.4654	22.6541
P03980	Ig heavy chain V region VH558 A1/A4	1	1
P06327	Ig heavy chain V region X44	1	1				21.2499	21.4474	21.6637	19.2882
P01807	Ig heavy chain V-III region J606	5	4	23.5347	22.8327	25.6693	26.541	26.8216	26.4406	26.5308	26.4329	26.5066
P01801	Ig kappa chain V-I region S107A	6	1	22.4228	22.4136	22.0902	23.9162	23.7372	24.0098	22.3245	21.9701	22.271
P01632	Ig kappa chain V-II region 7S34.1	4	4	24.5277	23.7447	24.4805	24.3756	24.5732	24.5067	23.8246	23.72	23.6285
P01630	Ig kappa chain V-II region MOPC 167	3	3	21.9198	21.0846		23.1446	22.9377	22.9289	22.652	22.3539	22.1956
P01626	Ig kappa chain V-III region MOPC 70	1	1				20.6865
P01656	Ig kappa chain V-III region PC 2485/PC 4039	4	3	21.2469	20.8797	21.4103	23.3414	22.7713	23.2422	22.5794	22.6668	22.7344
P01673	Ig kappa chain V-III region PC 3741/TEPC 111	3	1
P01660	Ig kappa chain V-III region PC 4050	3	2	21.5455	20.584	21.3038	23.0419	22.9209	23.1392	22.4951	22.1594	22.5456
P01663	Ig kappa chain V-III region PC 7043	1	1				21.5094	21.3897	21.8346	19.9126	20.9298	20.5816
P01665	Ig kappa chain V-III region PC 7175	2	1				20.4483			20.3052
P01671	Ig kappa chain V-V region HP R16.7	5	3	22.2716	22.4673	23.5546	25.3098	25.4798	25.3052	24.9714	25.2389	25.2876
P01644	Ig kappa chain V-V region K2 (Fragment)	5	4	23.726	23.5024	24.0887	24.9312	25.1465	25.1237	24.7549	24.5269	24.8767
P01635	Ig kappa chain V-V region L6 (Fragment)	4	3	26.5667	26.5686	26.5441	27.1732	27.2649	27.1822	27.0104	26.9661	26.9665
P01638	Ig kappa chain V-V region L7 (Fragment)	2	1	22.6597	22.6644	21.9793	24.3765	24.173	24.327	23.8214	23.723	23.6245
P01642	Ig kappa chain V-V region MOPC 149	2	2	24.6567	24.4822	24.52	24.0424	23.8199	24.2001	21.5432	22.25	21.9107
P01636	Ig kappa chain V-V region MOPC 173	2	1
P01643	Ig kappa chain V-VI region NQ2-17.4.1	3	1	21.3676	21.2338	21.5653	23.1688	23.4444	23.2609	22.9182	23.1553	23.1608
P04940	Ig kappa chain V-VI region XRPC 24	2	1	23.4717	23.4506	22.7313	25.0921	24.8957	24.9561	24.9493	24.9105	24.9189
P01676	Ig lambda-1 chain V region	3	3	25.3955	25.3203	25.7667	26.245	26.3836	26.2496	26.4152	26.6056	26.6195
P01723	Ig lambda-1 chain V regions MOPC 104E/RPC20/J558/S104	6	6	24.7064	24.6019	24.6332	25.1891	25.0594	25.0785	25.1274	25.0711	25.126
P01724	Ig lambda-3 chain C region (Fragment)	2	2
A0A0G2JGQ8	Imidazolonepropionate hydrolase	3	3	20.304	20.4796	19.5698	22.3201	22.3002	21.8166	22.0388	21.6063	21.6245
Q3UEL5	Immunity-related GTPase family M member 2	6	6	23.4005	23.4831	23.351	17.9179		17.8372	22.4253	22.4907	22.2785
Q9Z1M2	Immunity-related GTPase family M protein 1	2	2	18.3663		17.8682				20.0872	20.0754
Q60766	Immunity-related GTPase family, cinema 1	3	3	22.1852	22.5579	22.3705	21.3112	20.6679	20.8959	22.1363	21.1302	21.3517
D3Z720	Immunoglobulin heavy constant gamma 2B (Fragment)	2	2
A0A075B5P3	Immunoglobulin heavy constant mu	14	1	29.4956	29.3258	29.534	30.5265	30.6257	30.5734	30.2012	30.2898	30.149
P01872	Immunoglobulin heavy variable 1-22 (Fragment)	15	15	32.5069	27.6666	27.5279	28.2149	28.1733	28.1415	28.3493	28.3393	28.2929
A0A075B5U7	Immunoglobulin heavy variable 1-31	3	1
A0A075B5V1	Immunoglobulin heavy variable 1-4 (Fragment)	4	1	26.0708	26.0032	26.0566	27.0844	27.1349	27.3691	27.0327	27.0072	26.9486
A0A075B5T4	Immunoglobulin heavy variable 1-62-2	2	2			20.7038	22.8602	22.8154	23.1947	22.8315	22.0412	23.1559
A0A075B680	Immunoglobulin heavy variable 1-76 (Fragment)	4	4	21.6107	21.8431	22.0979	23.6634	24.1191	23.6899	23.1788	24.0026	23.6184
A0A0G2JFE9	Immunoglobulin heavy variable 1-81 (Fragment)	1	1	20.7125	20.7413	18.853	23.0643	23.2282	23.0081	24.9239	24.8613	24.9071
A0A075B5Y4	Immunoglobulin heavy variable 1-82	2	1				20.6708	20.9072	20.8409	20.0017	20.5234
A0A0B4J1J7	Immunoglobulin heavy variable 10-1 (Fragment)	2	2	19.5663			21.6649	21.4312	21.8149	19.9589	20.1703	19.7632
A0A0B4J1J6	Immunoglobulin heavy variable 13-2 (Fragment)	5	2	22.4499	21.9698	22.0713	23.2896	23.5966	23.835	23.0511	22.6097	22.6925
A0A0A6YWN3	Immunoglobulin heavy variable 14-1 (Fragment)	2	2
A0A075B5R4	Immunoglobulin heavy variable 2-5	3	3	24.0127	23.1246	23.9808	22.559	23.0296	22.3741	23.2275	21.9338	22.9722
A0A075B5Q3	Immunoglobulin heavy variable 2-6 (Fragment)	3	3	22.0205	21.3807	21.5107	23.0654	23.083	22.6454	22.523	22.7004	22.5404
A0A075B6A7	Immunoglobulin heavy variable 3-5	1	1	20.7585	20.3997	20.729	22.6361	22.6312	22.8628	22.4864	22.5942	22.4119
A0A0A0MQC1	Immunoglobulin heavy variable 5-12 (Fragment)	1	1	24.1634	24.2195	24.3362	25.941	25.6014	25.9059	21.6729	21.54	21.849
A0A075B5Q4	Immunoglobulin heavy variable 5-17 (Fragment)	3	1	22.1098	22.1747	22.2883	23.6527	23.715	23.8957	23.4464	23.466	23.1392
A0A075B5R1	Immunoglobulin heavy variable 5-6 (Fragment)	3	1	19.1384	19.7709					23.0566	23.7517	23.8337
A0A075B5Q0	Immunoglobulin heavy variable 5-9 (Fragment)	4	1	21.7527	24.3052	21.4698	24.1547		25.4894
A0A075B5Q2	Immunoglobulin heavy variable 5-9-1	3	1		20.6973	21.6157	21.8203	21.5596	21.3345	20.6741		21.3095
A0A075B5Q6	Immunoglobulin heavy variable 6-3 (Fragment)	4	1	22.8783	22.609	23.1497	24.2011	24.4217	24.4496	24.0673	24.2134	24.2984
A0A075B5T2	Immunoglobulin heavy variable 6-6 (Fragment)	6	2	20.6305	20.6511	21.1185	22.733	22.6711	22.9602	21.0603	22.5723	22.6081
A0A075B5T3	Immunoglobulin heavy variable 7-3 (Fragment)	7	3	25.7693	25.3062	25.883	26.8105	26.6919	26.6864	26.5454	26.1345	26.1761
A0A075B5R2	Immunoglobulin heavy variable 9-4	2	1	19.9821	19.6867		21.5482	21.5233	21.4611
A0A075B5S9	Immunoglobulin heavy variable V1-12	2	2	23.4537	23.3859	23.1477	22.4151	22.0981	22.113	22.9223	23.0237	22.7907
A0A075B5U0	Immunoglobulin heavy variable V1-18 (Fragment)	1	1	20.102		20.0149	20.8855	21.2579	20.7372	20.0445	20.8445	19.852
A0A0A6YXN4	Immunoglobulin heavy variable V1-20	3	2	21.8621	21.6994	19.8953	22.618	22.8087	22.7077	22.24	22.6208	22.377
A0A075B5U6	Immunoglobulin heavy variable V1-43 (Fragment)	3	2	23.3609	23.269	23.7136	23.7553	23.7395	23.8412	23.0089	23.1105	23.1705
A0A0A6YXN5	Immunoglobulin heavy variable V1-5	3	1	21.0252	20.9854	20.9166	23.7103	23.5754	24.5501	24.4657	24.502	24.4003
A0A075B5T5	Immunoglobulin heavy variable V1-67 (Fragment)	1	1	22.0262	22.2521	21.9185	23.4311	23.2526	23.5126	22.7961	22.8564	22.773
A0A0G2JFN9	Immunoglobulin heavy variable V1-9 (Fragment)	2	2	22.4421	21.4597	22.9638	24.2592	24.5251	24.7335	25.0484	24.7338	24.5945
A0A0A6YW37	Immunoglobulin heavy variable V10-3 (Fragment)	1	1
A0A075B5T6	Immunoglobulin heavy variable V8-11 (Fragment)	5	2	22.6848	22.782	22.5406	23.9649	24.0205	24.145	23.4805	23.5857	23.3813
A0A075B5X4	Immunoglobulin heavy variable V8-12 (Fragment)	1	1				20.5854	20.932	21.3009	21.3779	21.488	20.8298
A0A0G2JDE1	Immunoglobulin heavy variable V8-5 (Fragment)	1	1	20.4929		20.7946	21.3696	21.2174	21.2995			20.8889
A0A0A6YY60	Immunoglobulin J chain	1	1
P01592	Immunoglobulin kappa chain variable 1-88 (Fragment)	2	2	21.0099	20.8329	21.0564	20.6076		21.0585
A0A140T8N1	Immunoglobulin kappa chain variable 12-38 (Fragment)	5	2				20.7644	21.3235	21.002
A0A0G2JEI7	Immunoglobulin kappa chain variable 13-85 (Fragment)	1	1				20.4503			20.7628	20.5399
A0A075B666	Immunoglobulin kappa chain variable 15-103 (Fragment)	2	2	24.3167	23.8662	24.3328	23.9911	24.2251	23.8625	22.9368	22.6445	22.6721
A0A140T8P3	Immunoglobulin kappa chain variable 19-93 (Fragment)	1	1	22.8673	24.1839	23.1959	23.4716	24.0888	24.0252	21.45	20.9759	20.7576
A0A0G2JFZ3	Immunoglobulin kappa chain variable 4-61	2	2		21.4235	21.2125
A0A075B5M2	Immunoglobulin kappa chain variable 4-72 (Fragment)	2	1					19.9486		20.272	20.0597	20.3637
A0A0B4J1I4	Immunoglobulin kappa chain variable 4-91 (Fragment)	3	2	22.1197	21.1466	22.3613	24.079	24.1868	24.2618	23.4967	22.9009	23.2891
A0A075B5L2	Immunoglobulin kappa chain variable 5-43 (Fragment)	2	1	21.2064	21.2887	20.9807	22.8	22.7102	23.1447	21.9365	21.7933	21.9805
A0A0B4J1J2	Immunoglobulin kappa chain variable 6-25 (Fragment)	2	2	22.9827	23.1846	23.1645	24.3157	23.9463	24.0089	24.275	24.1188	23.871
A0A140T8N7	Immunoglobulin kappa chain variable 8-24 (Fragment)	4	1	21.3664	21.6065	21.602	23.1175	23.1382	23.1246	22.4696	22.8944	22.84
A0A140T8P5	Immunoglobulin kappa chain variable 8-27	1	1	24.0016	23.8609	24.2394	24.2071	24.1997	24.5582	24.7399	24.8711	24.8868
A0A075B5N4	Immunoglobulin kappa chain variable 8-30 (Fragment)	3	2	21.4124	21.7466	21.6608	22.3801	22.6451	22.3393	22.4468	22.3476	22.5744
A0A140T8M3	Immunoglobulin kappa chain variable 9-120 (Fragment)	4	3	22.8194	24.552	25.0401	23.8671	24.1296	24.0917	23.988	23.2166	24.763
A0A140T8N0	Immunoglobulin kappa chain variable 9-124	2	2
A0A075B5K2	Immunoglobulin kappa constant	2	2	24.1716	23.6104	23.873	25.3045	25.7975	25.784	25.2617	25.3442	25.4057
P01837	Immunoglobulin kappa variable 1-110 (Fragment)	6	6	28.5887	28.3851	28.3743	29.0811	28.9747	28.9729	28.7921	28.6897	28.7577
A0A0B4J1I0	Immunoglobulin kappa variable 1-117 (Fragment)	6	1	20.073	19.813	20.112	24.352	24.5371	24.0641	23.0216	23.9679	23.6489
A0A140T8M0	Immunoglobulin kappa variable 1-135 (Fragment)	7	2	26.0584	26.1224	26.2286	27.2233	27.3789	27.1193	26.7338	26.7125	26.7235
A0A0B4J1H7	Immunoglobulin kappa variable 10-94 (Fragment)	4	4	24.8475	24.9243	24.9553	26.5456	26.5832	26.3487	25.6576	25.3948	25.3917
A0A075B5L1	Immunoglobulin kappa variable 12-44 (Fragment)	2	1							21.5684
A0A140T8M2	Immunoglobulin kappa variable 12-46 (Fragment)	3	1	24.4628	24.4061	24.3547	25.3185	25.1932	25.2947	25.1441	25.0541	24.9764
A0A140T8P6	Immunoglobulin kappa variable 14-126 (Fragment)	2	2	25.5467	25.9393	25.9341	25.5366	25.6935	25.4954	25.7491	25.6341	25.6103
A0A075B5K0	Immunoglobulin kappa variable 16-104 (Fragment)	3	2	20.7699	20.4794	19.9093	22.9171	22.9255	21.1098	22.8477	24.5609	23.1136
A0A0B4J1I1	Immunoglobulin kappa variable 17-121 (Fragment)	2	2	22.1185	21.838	22.3764	25.097	24.9835	24.7469	24.1558	25.0586	24.037
A0A0G2JFA8	Immunoglobulin kappa variable 3-7	1	1				20.2732	20.6475		21.3932	20.9872	21.2695
A0A075B5N9	Immunoglobulin kappa variable 4-50 (Fragment)	2	1	22.0013	22.1917	21.791	22.9531	22.8833	22.6842	22.3531	22.4096	22.5078
A0A0B4J1J0	Immunoglobulin kappa variable 4-53	1	1				20.0409	20.7068	20.8031	19.8278		20.1775
A0A075B677	Immunoglobulin kappa variable 4-55 (Fragment)	2	2	21.8536	21.5738	21.4822	22.9042	22.8451	22.9871	21.4587	22.3419	22.3651
A0A0B4J1I9	Immunoglobulin kappa variable 4-57 (Fragment)	3	2	23.158	23.1582	22.2702	24.4412	23.7179	23.7713	23.1534	22.9091	22.8663
A0A0A6YYE7	Immunoglobulin kappa variable 4-57-1 (Fragment)	4	2	25.6271	25.5748	25.7319	26.4476	26.5778	26.5091	25.8601	25.7163	25.8162
A0A075B5M4	Immunoglobulin kappa variable 4-63	2	1	19.6864	20.0215	20.8138	22.1906	21.943	22.2844	21.2102	21.7099	21.7617
A0A075B5M1	Immunoglobulin kappa variable 4-74 (Fragment)	3	2	22.7514	22.7308	22.9126	23.8841	23.8391	23.8801	23.6118	23.5657	23.7154
A0A0B4J1I3	Immunoglobulin kappa variable 6-13	3	2	19.882			22.7871	22.8036	22.4406	22.1956	20.5386	22.0363
A0A075B5N7	Immunoglobulin kappa variable 6-15 (Fragment)	4	2
A0A140T8M5	Immunoglobulin kappa variable 6-17 (Fragment)	4	3	25.4573	25.6407	25.5071	26.7237	26.6827	26.7117	26.2077	26.0861	25.9426
A0A140T8Q3	Immunoglobulin kappa variable 6-23 (Fragment)	3	1	25.102	25.0113	25.4147	24.107	24.3762	24.3847	23.6399	23.6959	23.6722
A0A140T8N5	Immunoglobulin kappa variable 6-32 (Fragment)	4	1	24.4434	24.46	24.4465	25.3579	25.4317	25.4528	24.7683	24.6217	24.7334
A0A140T8N9	Immunoglobulin kappa variable 8-19	4	4	24.4229	24.3374	24.7023	26.0683	26.2178	26.2495	25.299	25.6387	25.5654
A0A140T8M4	Immunoglobulin kappa variable 8-28	2	1				21.0279	21.7952	21.5101	20.5246	21.681	21.7269
A0A075B5N3	Immunoglobulin lambda constant 1 (Fragment)	2	2	22.938	23.2988	22.8043	23.6612	23.5925	23.7872	22.0608	21.556	22.6575
A0A0G2JE99	Immunoglobulin superfamily member 3	4	4	24.6438	24.8165	25.0761	25.813	25.7015	25.4524	25.4251	25.371	25.4111
Q6ZQA6	Immunoglobulin-binding protein 1b	1	1	18.5661	18.9835	18.2999
Q9QZ29	Importin subunit alpha	2	2	23.1445	23.3889	23.1446	24.5161	24.5454	24.2872	24.5759	24.5021	24.3755
Q4FJZ2	Importin subunit alpha-3	3	3	20.9428	20.206	21.1669	21.0336	21.1218	21.4563	21.5923	21.9481	21.9778
A0A0B4J1E7	Importin subunit alpha-4	5	2	20.4694	20.5248						20.1293
O35344	Importin subunit beta-1	7	4	24.0891	24.0268	23.957	23.1005	23.5015	23.5415	22.9745	23.0654	24.2258
P70168	Importin-11	14	14	26.1655	26.2438	25.9306	25.2007	25.2721	25.0952	25.9247	25.7934	25.8327
Q8K2V6	Importin-4	3	3	19.7484	19.974	18.947	20.4187	20.4748	21.0115		20.778
Q5U4C5	Importin-5	3	3	20.9848	20.8952	20.8795	18.6046	18.7059	19.9817	20.7026	21.0305	21.0751
Q8BKC5	Importin-7	25	25	26.0409	26.2899	26.376	26.1378	26.145	26.0208	26.3717	26.3161	26.28
Q9EPL8	Importin-9	9	9	22.7834	22.3004	21.2725	22.1601	22.3323	22.5072	24.8632	25.0721	25.3635
Q91YE6	Inactive 2'-5'-oligoadenylate synthase 1B	5	5	22.7722	23.1751	23.3944	22.1478	23.6165	23.442	24.406	23.4757	23.0112
Q60856	Inactive dipeptidyl peptidase 10	1	1
Q6NXK7	Inactive serine protease PAMR1	1	1	17.5686	17.6262	16.9838	16.9398	17.5912	16.7345	17.3315	17.3541	17.0633
Q8BU25	Inactive serine/threonine-protein kinase TEX14	1	1	23.2341	23.6792	23.6885
Q7M6U3	Inactive tyrosine-protein kinase 7	1	1	21.7836	21.8962	22.0463	20.868	20.9909		22.3133
Q8BKG3	Indoleamine 2,3-dioxygenase 2	2	2	20.7598	20.6478	19.6888					24.056
Q8R0V5	Indolethylamine N-methyltransferase	1	1			20.6059	19.1616	18.5228		20.3486	20.4904	19.989
P40936	Inhibin beta A chain	6	6	23.3806	23.4501	23.3917	23.1032	22.4587	23.0528	23.85	22.467	23.6606
Q04998	Inhibitor of carbonic anhydrase	1	1	17.1055	16.4888	16.1336	15.6406	16.3159	15.9063	17.9784	17.9346	18.0569
Q9DBD0	Inhibitor of growth protein 5	26	26	26.1204	26.193	25.9339	28.0942	28.2388	28.1897	28.3237	28.1892	28.1103
Q9D8Y8	Inhibitor of nuclear factor kappa-B kinase subunit beta	1	1				20.4574	19.9765	20.7746		21.6655
O88351	Inorganic pyrophosphatase	6	6	24.4893	24.5932	24.3571	22.6675	22.8361	21.8722	24.0143	23.8931	23.9659
Q9D819	Inosine triphosphate pyrophosphatase	14	14	30.3471	30.4957	30.2008	25.6334	26.0864	25.3652	25.9929	25.8527	26.0186
Q9D892	Inosine-5'-monophosphate dehydrogenase 2	2	2	21.2301	21.1288	21.4998		20.5525
P24547	Inositol hexakisphosphate and diphosphoinositol-pentakisphosphate kinase 2	12	12	24.2806	24.3968	24.3383	23.1245	23.1574	22.8643	23.7233	23.838	23.7787
Q6ZQB6	Inositol monophosphatase 2	1	1
Q91UZ5	Inositol polyphosphate 5-phosphatase OCRL	1	1
Q6NVF0	Inositol polyphosphate-5-phosphatase A	1	1	15.0567	15.2675	14.3258	13.3824	14.229	13.5903
Q7TNC9	Insulin receptor-related protein	2	2	18.4538	19.0133	18.7925	18.1966		18.0443	18.4188	17.9641
Q9WTL4	Insulin-like growth factor I	1	1		20.4704	19.8508
E9Q138	Insulin-like growth factor II (Fragment)	9	9	26.7811	27.0596	27.0512	27.3929	27.6107	27.5068	27.6353	27.4726	27.4811
D3Z4N4	Insulin-like growth factor-binding protein 1	4	4	26.2369	26.3812	27.6914	26.161	26.2576	26.165	26.2817	26.2226	25.87
P47876	Insulin-like growth factor-binding protein 2	5	5	23.5805	23.5832	23.6511	24.8382	24.9993	24.9616	24.8379	24.9808	24.8043
P47877	Insulin-like growth factor-binding protein 3	15	15	26.6308	26.5706	26.5769	26.4142	26.6607	26.5693	27.2197	27.2103	27.1807
P47878	Insulin-like growth factor-binding protein 4	16	16	26.7509	26.7685	26.7174	28.0824	28.1389	28.0619	27.9817	27.9752	28.0408
P47879	Insulin-like growth factor-binding protein 5	10	10	26.855	26.851	26.5772	26.0128	26.0505	26.0653	27.0693	27.1246	26.9104
Q07079	Insulin-like growth factor-binding protein 6	10	10	26.2768	26.2777	26.1528	26.8665	27.2973	26.9078	27.2502	27.29	26.4877
P47880	Insulin-like growth factor-binding protein 7	5	5	24.2741	24.1103	23.8397	23.4514	23.4639	23.3742	25.1079	24.8601	24.8415
E9Q5D9	Insulin-like growth factor-binding protein complex acid labile subunit	7	7	23.6143	23.8683	18.6705	23.1635	19.2341	20.6526	22.9396	22.5996	22.6641
A0A0R4J0S2	Integrin alpha-3	11	11	26.7371	26.8112	26.9668	26.7255	27.0034	26.7399	26.3378	26.4999	26.6055
Q62470	Integrin alpha-L	6	6	24.4468	23.9941	24.1668	23.5088	23.6358	24.1052	23.8497	24.0828	23.9623
P24063	Integrin alpha-M	1	1	24.5492	24.1968	24.8373	26.3396	26.4323	26.5584	26.4034	26.2193	26.2149
G5E8F1	Integrin beta	1	1	20.6841	20.2838	20.3319
Q542I8	Integrin beta-1	5	5	20.6036	20.233	20.4835	16.4033	19.7716		18.5487	18.2575	19.0538
P09055	Integrin-associated protein	10	10	24.3121	24.213	24.2023	23.1048	23.0658	22.5025	22.9251	23.2648	23.0383
A0A2R8VI30	Integrin-linked kinase-associated serine/threonine phosphatase 2C	3	3	22.9882	22.5347	23.0303	23.151	23.2422	23.2257	20.1242	20.285	20.0929
Q8R0F6	Integrin-linked protein kinase	4	4	25.3011	24.6384	24.8055	24.4122	24.1345	24.4005	24.3058	24.2782	24.3371
O55222	Inter alpha-trypsin inhibitor, heavy chain 4	16	16	26.2731	26.4242	26.423	26.5361	26.4851	26.4888	26.4742	26.5445	26.5233
E9PVD2	Inter alpha-trypsin inhibitor, heavy chain 4	39	1	24.8387	25.1888	25.288	25.5274	25.3477	24.9309	25.5058	25.8285	25.8955
A6X935	Inter-alpha-trypsin inhibitor heavy chain H1	49	11	31.7954	31.8127	32.053	31.8874	31.8677	31.9407	32.4355	32.4253	32.4923
Q61702	Inter-alpha-trypsin inhibitor heavy chain H2	38	38	30.7544	30.6741	30.6383	31.5879	31.6573	31.5489	30.7978	30.8482	30.7655
Q61703	Inter-alpha-trypsin inhibitor heavy chain H3	32	32	29.68	29.6524	29.8444	30.6901	30.7059	30.6922	30.2228	30.1606	30.1875
Q61704	Interferon gamma-induced GTPase	9	9	26.2202	26.3017	26.0108	28.3373	28.2346	28.0565	26.9008	27.9499	27.6321
Q9DCE9	Interferon regulatory factor 2-binding protein 2	1	1
E9Q1P8	Interferon regulatory factor 3	2	2	21.1265	21.3392	21.6275	20.149	19.6755	19.9087	21.2976	21.1599	20.8133
P70671	Interferon-activable protein 202	3	3	20.5329	20.7885	20.3016	20.1049	20.176	20.0804	21.112	20.9443	21.0889
Q9R002	Interferon-activable protein 204	2	2
P0DOV2	Interferon-activable protein 205-A	15	11	24.1704	24.3057	24.4331	23.6419	24.2665	23.866	24.4026	24.1852	24.1855
Q8CGE8	Interferon-gamma-inducible GTPase Ifgga2 protein	15	12	25.5422	25.4502	25.4592	25.0871	24.89	24.8189	25.8618	25.9787	25.8543
Q3UED7	Interferon-induced 35 kDa protein homolog	2	1	16.7279				13.8343		17.4499	16.2703	15.9865
Q9D8C4	Interferon-induced helicase C domain-containing protein 1	2	1	18.2533	18.4496	17.7127	16.2838	17.0988	16.8034	17.7701	17.8575	17.9988
Q8R5F7	Interferon-induced protein 44	8	8	23.0613	23.0237	23.0166	22.9775	22.5696	22.8719	23.4098	23.3851	23.0873
Q8BV66	Interferon-induced protein 44-like	1	1
Q9BDB7	Interferon-induced protein with tetratricopeptide repeats 1	3	3	18.7909	18.9644	18.7305	13.3157	15.1152	13.8646	15.4799	15.4428	15.2403
Q64282	Interferon-induced protein with tetratricopeptide repeats 3	9	9	24.2496	24.6948	23.6826	24.1503	24.2874	23.8549	24.2097	24.1983	23.8513
Q64345	Interferon-induced transmembrane protein 3	7	6	22.3919	22.7342	22.075	22.293	22.0162	20.8992	18.6312	21.8132	21.1571
Q9CQW9	Interferon-induced, double-stranded RNA-activated protein kinase	3	3	22.0605	22.2269	21.8955		19.9531	19.7221	21.5034	21.3913	20.9972
Q03963	Interferon-inducible GTPase 1	5	5	22.1561	22.0672	21.8533	22.4653	22.3709	21.8256	24.0159	23.9538	23.9817
Q9QZ85	Interleukin enhancer-binding factor 2	7	6	23.4571	24.5406	24.2996	23.8725	23.6691	24.0682	25.2289	25.0672	24.8769
Q9CXY6	Interleukin enhancer-binding factor 3	4	4	21.1648	21.0993	22.4638	21.7853	21.8492	21.4812	22.6605	22.4989	22.2365
A0A1L1STE4	Interleukin-1 receptor-associated kinase 4	11	11	23.8563	23.7233	23.7162	23.8921	23.8699	23.779	23.3819	23.9272	23.7149
Q8R4K2	Intersectin-1	3	3	16.8535	17.3844	16.346		15.6393	14.3041	17.3876	17.8577	17.3819
Q9Z0R4	Intraflagellar transport protein 81 homolog	12	12	24.5304	25.0782	24.8705	22.6584	22.4681	22.5158	23.032	23.0704	22.9039
O35594	Iodotyrosine deiodinase 1	7	7	27.5611	27.5576	27.5935	28.2733	27.9087	27.8085	28.2124	28.3822	28.3622
Q9DCX8	IQ motif and SEC7 domain-containing protein 1	2	2	22.5039	19.8197	22.4768	18.3183	18.4856	20.7388	21.9339	22.181	22.3001
A0A1D5RM83	IQ motif and SEC7 domain-containing protein 3	2	2	18.4326	18.5497	18.1043	17.7183	17.7387	17.9584	19.1867	18.6956	19.2673
Q3TES0	Isoaspartyl peptidase/L-asparaginase	1	1	21.0562	21.6181	21.3747	21.2367	21.3161	21.6196	22.0253	21.3361	21.49
Q8C0M9	Isobutyryl-CoA dehydrogenase, mitochondrial	1	1
Q9D7B6	Isocitrate dehydrogenase [NAD] subunit alpha, mitochondrial	12	12	24.7098	25.1049	24.9083	21.9443	22.6141	22.1035	21.9573	21.093	21.7377
Q9D6R2	Isocitrate dehydrogenase [NAD] subunit gamma 1, mitochondrial	11	11	26.9583	27.0309	26.9479	26.9039	27.132	26.8928	27.0161	26.7508	26.8588
P70404	Isocitrate dehydrogenase [NAD] subunit, mitochondrial	6	6	24.4652	24.4199	24.2461	24.4043	24.5256	24.4507	24.1692	24.2525	24.36
Q91VA7	Isocitrate dehydrogenase [NADP] cytoplasmic	10	10	24.8538	24.9249	24.7544	22.5929	22.1909	21.3633	22.7625	23.1739	22.4382
O88844	Isocitrate dehydrogenase [NADP], mitochondrial	19	18	29.6261	29.4396	29.2767	28.0709	28.0241	28.7876	28.0459	28.1231	28.5966
P54071	Isoleucine--tRNA ligase, cytoplasmic	21	20	28.6191	28.7983	28.7538	27.8373	27.7815	27.8203	27.8255	27.8347	27.801
Q8BU30	Isoleucine--tRNA ligase, mitochondrial	31	31	24.7352	24.9591	24.8596	25.1387	25.1425	25.4271	26.0968	26.2944	26.2409
Q8BIJ6	Isovaleryl-CoA dehydrogenase, mitochondrial	8	8	22.0455	22.3328	21.9205	21.741	22.0646	22.1138	22.5386	22.5837	22.6728
Q9JHI5	IST1 homolog	8	8	24.3927	24.7413	24.4743	21.0673	21.6535	22.1844	25.0386	24.9376	24.7909
Q9CX00	Janus kinase and microtubule-interacting protein 2	6	6	23.8238	23.6231	23.7222	23.7802	23.4863	23.53	23.3273	23.1885	23.0304
D3YXK0	Junction plakoglobin	1	1	20.782	20.4684	20.2646	21.0377	20.9618	20.9606	21.7046	21.5803	21.3852
Q02257	Jupiter microtubule associated homolog 2	15	14	23.5463	23.1589	22.9919	23.6322	23.4	23.873	23.7336	23.8088	24.1236
Q6PGH2	K(+) channel subunit beta-2	2	2	22.6239	22.344	22.2646		22.0413	21.7389	21.9626	21.6905
Q3UPV6	Katanin p60 ATPase-containing subunit A1	2	2	21.9608	23.5948	23.3883		18.6388
E9QKG2	Kelch domain-containing protein 4	1	1	21.966		21.2178
G3UZG5	Kelch-like protein 40	1	1
A0A0R4J166	Kelch-like protein 41	1	1
A2AUC9	Keratin 78	8	8	22.4506	22.2461	22.4232	19.991	20.5611	19.916			19.0054
E9Q0F0	Keratin, type I cytoskeletal 10	4	4	28.307	28.2085	28.0653	28.7532	28.8901	29.0613	28.9547	28.8005	28.9745
A2A513	Keratin, type I cytoskeletal 12	13	10	29.9493	30.1066	29.9375	30.1528	30.2594	30.2099	30.4231	30.3914	30.2338
Z4YJD9	Keratin, type I cytoskeletal 14	1	1							22.6462
Q61781	Keratin, type I cytoskeletal 15	22	6	29.238	29.1445	29.0075	29.6334	29.494	29.598	28.9264	29.0071	28.8982
Q61414	Keratin, type I cytoskeletal 16	7	2	24.2331	23.8915	24.1027	23.1162	24.3188	24.0948	24.6245	24.2286	24.1202
Q9Z2K1	Keratin, type I cytoskeletal 17	11	4	24.1184	24.3758	24.7528	24.7189	24.7684	24.8222	25.8973	25.9784	25.8474
Q9QWL7	Keratin, type I cytoskeletal 18	18	5	28.8123	28.7687	28.6041	29.2414	29.1694	29.3676	29.3781	29.4549	29.1685
P05784	Keratin, type I cytoskeletal 19	9	6	22.3273	22.7979	22.3606	21.1996	22.1723	21.9169
P19001	Keratin, type I cytoskeletal 42	15	11	26.2898	26.2894	26.3261	24.2586	24.2951	24.1892	25.0475	24.5808	24.7217
Q6IFX2	Keratin, type II cuticular Hb5	17	7	27.2502	27.4166	27.2885	27.0212	27.1841	27.2145	27.6317	27.4743	27.6965
Q9Z2T6	Keratin, type II cytoskeletal 1	2	1	20.5502		20.6751				21.2892	21.1644	20.8194
P04104	Keratin, type II cytoskeletal 1b	10	6	29.7522	29.8892	29.8879	30.1311	30.1041	30.1309	30.0756	29.9293	29.8154
Q6IFZ6	Keratin, type II cytoskeletal 2 epidermal	10	3	22.4217	22.3925	22.8871	24.1607	23.9361	23.826	23.393	23.0902	23.0719
Q3TTY5	Keratin, type II cytoskeletal 2 oral	13	9	29.2635	29.2227	29.629	29.8535	29.7356	29.8415	30.0686	30.0294	29.9661
Q3UV17	Keratin, type II cytoskeletal 4	7	2	28.4808	28.6497	28.3808	26.1196	28.6379	27.7582	24.9959	24.7257	24.8938
P07744	Keratin, type II cytoskeletal 5	7	3	24.5362	24.7098	24.5201	24.3561	24.2411	24.3904	25.1354	24.9411	24.947
Q922U2	Keratin, type II cytoskeletal 6A	23	12	28.9235	28.9963	28.7422	29.6652	29.6391	29.6638	29.544	29.7873	29.8438
P50446	Keratin, type II cytoskeletal 7	19	6	26.5313	26.2936	26.3262	26.9199	26.5617	26.5709	26.9422	26.823	26.2118
Q9DCV7	Keratin, type II cytoskeletal 72	19	14	25.818	26.5258	26.3454	27.1789	27.1622	27.2389	24.183	27.5245	27.0582
Q6IME9	Keratin, type II cytoskeletal 73	3	1	21.3522	21.8906	21.6852	21.6059	22.1979	22.1774	22.5184	22.5524	22.288
Q6NXH9	Keratin, type II cytoskeletal 75	9	3	22.0806	26.1959	24.3527	20.642	20.957	21.062	21.5995	22.2966	21.3303
Q8BGZ7	Keratin, type II cytoskeletal 79	11	1	23.7676	23.8206	24.1255	25.0437	25.0049	25.0535	24.9863	24.9979	25.0221
Q8VED5	Keratin, type II cytoskeletal 8	6	1		20.1169	18.9866	18.3045	18.1119	21.4421	21.8858	21.5877	19.0617
P11679	Ketimine reductase mu-crystallin	19	11	24.9446	24.5832	24.4637	23.2376	22.4928	22.5946	22.8078	22.9098	23.592
O54983	Ketosamine-3-kinase	5	5	23.7461	23.6314	23.3242	24.0193	23.9474	23.737	24.3137	23.5141	24.0208
Q8K274	KH domain-containing, RNA-binding, signal transduction-associated protein 1	5	5	23.4526	23.0693	22.9571	22.8781	22.9463	22.3021	23.6812	23.9544	23.8029
Q60749	Kinectin	3	3	22.4101	21.7991	21.4831	21.4099	20.996	20.9846
Q61595	Kinesin family member 13B	8	8	24.9902	24.9462	24.898	23.3143	23.4308	23.3321	23.9236	24.0006	23.7483
E9Q4K7	Kinesin light chain	8	8	23.4133	23.2517	22.9434	22.7618	22.451	22.1716	22.8964	22.7671	22.7914
Q9DBS5	Kinesin light chain 4	2	1	19.6535	19.5265	18.9216	19.2156	18.8295	18.7093	20.9709	21.0935	20.6892
A0A5F8MPZ2	Kinesin-1 heavy chain	12	11	24.1969	25.1654	23.6157	23.3398	21.332	22.2312	23.6142	23.4313	24.7253
Q61768	Kinesin-like protein KIF19	38	38	28.2082	28.3095	27.9132	27.9294	28.1427	27.9908	27.7063	27.7926	28.107
Q99PT9	Kinesin-like protein KIF1B	1	1
A2AH75	Kinesin-like protein KIF27	3	3	23.6144	24.2866	24.3396	23.7033	23.6885	23.7834	24.4697	24.5143	24.2338
Q7M6Z4	Kinesin-like protein KIF2A	1	1	22.063		22.9746					22.0375	22.354
P28740	Kinesin-like protein KIFC3 (Fragment)	6	6	19.9431	19.9705	19.0588	20.7225	20.4574	20.3479	21.1946	21.1408	20.8183
A0A1D5RMF3	Kinetochore scaffold 1	1	1	21.5791	21.1719	21.2626	20.3404	20.341	20.2203	22.1195	21.7721	21.7498
A3KGI3	Kininogen 2	2	2
Q6S9I0	Klotho	8	5	23.8712	24.0316	23.5924	23.3438	23.0677	22.9494	24.7397	24.6892	24.6018
O35082	KN motif and ankyrin repeat domain-containing protein 2	1	1	21.8987	21.4965	21.7094	22.108	22.1971	22.0846	21.5266	21.558	21.506
Q8BX02	KN motif and ankyrin repeat domain-containing protein 4	2	2	17.4109	17.3528	16.6658	13.7696	13.8009	13.4236	15.1586	16.2029	15.6276
Q6P9J5	Kynureninase	1	1	16.7156	16.2752	16.0863				15.681	15.164	15.3796
Q9CXF0	Kynurenine--oxoglutarate transaminase 3	5	5	23.9671	24.0545	24.2843	24.4085	24.0154	24.1477	24.131	24.0003	24.2253
Q71RI9	L-fucose kinase	18	18	26.5806	26.4517	26.5924	24.3414	24.5103	24.1764	26.76	26.9618	26.8288
Q7TMC8	L-gulonolactone oxidase	3	3
P58710	L-lactate dehydrogenase	5	5	24.105	23.8791	23.6767	22.8516	22.0215	22.9877	23.5161	23.5546	23.0457
A0A1B0GSX0	L-lactate dehydrogenase	21	20	30.3599	30.3584	30.3485	29.4186	29.5481	29.5917	29.9532	29.8102	29.7757
A0A6I8MX27	L-selectin	11	10	27.1183	27.1171	27.1789	26.2099	26.1693	26.2198	26.313	26.4681	26.4078
P18337	L-serine dehydratase/L-threonine deaminase	9	9	24.2773	24.33	24.4168	25.6056	25.4021	25.2401	25.56	25.4882	25.3172
Q8VBT2	L-xylulose reductase	9	9	25.3072	25.4876	25.4365	25.3813	25.3069	25.4556	26.9961	26.8825	26.8372
Q91X52	La-related protein 1	3	3	21.9981	22.1299	21.9786	20.7106	20.0937	19.6983	22.5099	22.4995	22.4304
Q6ZQ58	Lactotransferrin	6	6	20.5768	21.3046	23.7593	22.9244	18.0644	17.7973	20.3306	18.8499	19.8348
P08071	Lamin-B1	32	32	27.926	28.0402	27.896	28.54	28.5102	28.4557	28.7021	29.5113	29.5372
P14733	Lamin-B2	20	19	25.8419	25.9821	25.8374	23.2204	24.5935	24.4393	25.0797	25.5203	25.4355
P21619	Lamina-associated polypeptide 2, isoforms beta/delta/epsilon/gamma	5	4	17.4049	20.8086	16.9938	17.9994	18.4047	18.0961	18.1783	18.5544	18.2129
Q61029	LanC-like protein 2 (Fragment)	9	9	26.4787	26.3904	26.424	27.6389	27.5208	27.7536	27.4858	27.4259	27.3853
F6RJV6	Large neutral amino acids transporter small subunit 3	7	7	22.3831	20.7698	21.8144	20.7738	18.1516	21.5636	23.1828	23.189	23.2186
Q8BSM7	Latent-transforming growth factor beta-binding protein 1	4	4	19.7138	19.4449		21.206	19.9154	20.5358	19.5295
Q8CG19	Latent-transforming growth factor beta-binding protein 3	22	22	25.4436	25.3627	25.0496	23.8771	23.6858	23.5754	25.7645	25.1095	25.2384
Q61810	Latent-transforming growth factor beta-binding protein 4	4	4	19.6255		23.022	21.6861	21.4375	21.5366	19.8081	20.5884	20.9615
Q8K4G1	Leiomodin-1	7	7	20.6734	20.2982	19.9614	22.3848	22.5727	22.5132	20.4994	20.9092	20.4446
Q8BVA4	Leucine rich repeat containing 57	1	1	19.8304	19.3158	20.862
Q8JZX5	Leucine--tRNA ligase, cytoplasmic	5	5	21.746	21.0904	21.0709	21.2304	21.0091	20.7102	20.8221	20.5411	20.5952
Q8BMJ2	Leucine-rich PPR motif-containing protein, mitochondrial	31	31	25.7312	25.571	25.4957	25.5645	25.5823	25.5834	26.3331	26.2907	26.1806
Q6PB66	Leucine-rich repeat and IQ domain-containing protein 4	12	12	23.4121	23.3932	22.7494	23.2523	23.076	23.175	23.2026	23.2286	23.1718
A6H6A4	Leucine-rich repeat flightless-interacting protein 1	1	1	24.4871	24.6791	24.4201	25.8014	25.835	25.9839	26.003	25.9277	25.9441
Q3UZ39	Leucine-rich repeat flightless-interacting protein 2	6	5	22.3012	22.7501	21.5921	21.989	21.8296	21.8809	22.4465	22.8148	22.1317
A0A0G2JFV5	Leucine-rich repeat neuronal protein 4	2	1
P59383	Leucine-rich repeat protein SHOC-2 (Fragment)	11	11	26.6294	26.9287	26.7507	25.9056	25.9435	26.0575	26.4683	26.3855	26.4381
A0A494BAG1	Leucine-rich repeat transmembrane neuronal protein 1	1	1	19.1064	19.7108	19.4038					19.6326	19.6835
Q8K377	Leucine-rich repeat-containing protein 40	1	1	21.6292	21.5846	21.6415	21.5314	21.5054	21.6253	21.8191	22.1086	22.1237
A0A0R4J0W6	Leucine-rich repeat-containing protein 42	1	1
Q8R2U7	Leucine-rich repeat-containing protein 47	1	1	20.2472		20.3857						19.5487
Q505F5	Leucine-rich repeat-containing protein 59	9	9	20.3371	21.5552	20.8785	16.2336	15.9142	15.8239	21.2771	21.9237	20.6047
Q922Q8	Leukocyte cell-derived chemotaxin-2	7	7	24.8747	25.2414	24.9951	24.8197	24.9653	25.2038	26.0025	25.8763	26.0524
O88803	Leukocyte elastase inhibitor A	4	4	25.8927	25.7991	26.3213	26.0957	26.1513	26.0956	25.8361	26.2253	26.1343
Q9D154	Leukotriene A-4 hydrolase	4	4	22.8196	22.1807	22.8292	21.343	21.229	21.1494	20.257	20.8953	20.5274
P24527	LIM and calponin homology domains-containing protein 1	22	22	26.5999	26.4748	26.5832	25.4995	25.8288	25.8337	26.0739	26.0553	26.0843
A0A571BG24	LIM and cysteine-rich domains protein 1	1	1	17.2666	17.6653	16.7361	15.2343
Q8VEE1	LIM and senescent cell antigen-like-containing domain protein	17	17	26.2877	26.1502	25.8916	25.1146	24.8824	25.1398	25.641	25.6626	25.5411
Q91XD2	LIM and senescent cell antigen-like-containing domain protein 2	4	2	21.5608	21.3838	21.9949	22.8948	22.5725	22.7412	20.6486	20.2801	20.178
E9QP62	LIM and SH3 domain protein 1	11	9	26.146	26.2669	26.2025	25.3848	25.2301	25.4696	26.1291	26.4492	26.1316
Q61792	LIM domain and actin-binding protein 1	7	7	25.7422	25.8232	25.6769	25.1407	25.1324	25.0985	25.623	25.7641	25.6655
Q9ERG0	LIM domain-binding protein 3	14	14	23.9433	23.6425	23.3785	23.0729	23.0073	23.2443	24.0571	24.8695	23.799
E9PYJ9	LIM domain-containing protein 1	12	12	23.0369	23.5451	22.8037		20.0054		20.4175	18.7391
Q9QXD8	Limbin	1	1	15.2251	14.9873	14.5329		13.1566	12.9488
Q8K1G2	LINE-1 retrotransposable element ORF2 protein	1	1		20.6032	20.7361	22.6119	22.8704	22.694	21.2601	21.4878
P11369	Lipid droplet-associated hydrolase	1	1		14.4707	14.3683	15.723	16.2636	15.9338	15.193	14.8811	14.8478
Q8BVA5	Lipoamide acyltransferase component of branched-chain alpha-keto acid dehydrogenase complex, mitochondrial	3	3	21.355	21.3276	21.1592	19.7572		18.0512	20.9232	20.6313	20.9826
P53395	Lipoma-preferred partner homolog	1	1	18.9121	19.8808	19.5343
Q8BFW7	Lipopolysaccharide-binding protein	13	13	24.5757	24.6036	24.6512	23.441	23.006	23.3943	24.0173	24.071	23.7264
Q61805	Lipopolysaccharide-responsive and beige-like anchor protein	15	15	27.2487	27.2383	27.6279	28.5472	28.6159	28.5707	28.1346	28.3155	28.4044
Q9ESE1	Lipoprotein lipase	2	2	20.5361	20.3786	19.6141	20.5562	20.264	20.0688	20.934	20.4946	20.5359
P11152	Liprin-beta-1	2	2	22.458	22.3084		23.4895	23.406	23.2935	22.5205	22.5265	22.2047
Q8C8U0	Liprin-beta-2	8	7	21.9612	22.958	22.4859	23.6006	23.4864	23.6377	24.3388	23.5939	23.9608
G3X957	Lon protease homolog, mitochondrial	6	5	18.8673	19.1381	18.5656	16.8058	17.5034	17.0442	18.499	19.0043	19.19
Q8CGK3	Long-chain specific acyl-CoA dehydrogenase, mitochondrial	6	6	23.022	23.1206	23.231	21.5266	21.2805	21.3953	22.5625	22.0805	22.8092
A0A0R4J083	Long-chain-fatty-acid--CoA ligase 1	15	15	26.8226	26.7411	26.8508	24.5288	24.7967	25.0992	24.4264	24.0348	24.4233
P41216	Long-chain-fatty-acid--CoA ligase 4	32	29	29.5506	29.4332	28.4965	28.6322	28.6739	27.9207	28.3777	28.5031	28.3666
Q9QUJ7	Long-chain-fatty-acid--CoA ligase 5	2	2	19.02	19.0234		19.3749	18.7322	19.299	20.4331	20.4188	20.4557
Q8JZR0	Low molecular weight phosphotyrosine protein phosphatase	14	11	22.6483	23.4541	23.252	20.0067	20.7468	20.4495	23.3162	23.3043	23.3605
Q9D358	Low-density lipoprotein receptor-related protein 2	4	4	24.3877	24.4534	24.5783	23.2052	23.6555	23.5413	24.2507	24.4018	24.3627
A2ARV4	Low-density lipoprotein receptor-related protein 4	1	1
Q8VI56	LRP chaperone MESD	1	1	21.2005	20.791	20.6764	20.912	20.2517	20.4707	20.8582	20.9077	20.8966
Q9ERE7	Luc7-like protein 3	12	12	26.2631	26.3993	26.3071	24.4471	24.7394	24.8043	24.6662	25.0532	24.5971
Q5SUF2	Lumican	3	3	19.4648	19.6112	19.1521	19.4297	18.8863		19.7694	19.4606	19.533
P51885	Lupus La protein homolog	6	6	26.1092	26.0291	25.9561	25.6641	25.7414	25.2388	25.6055	25.6739	25.4435
P32067	Lymphocyte expansion molecule (Fragment)	8	8	24.4299	24.7301	24.4444	22.5154	22.9504	22.7898	23.238	23.2941	23.2602
F6X5R4	Lymphocyte-specific protein 1	1	1	16.3346	16.1212	15.6256	15.0376	15.6438	15.0077	14.6428	14.617	14.5667
P19973	Lysine--tRNA ligase	4	4	20.276	20.4923	19.4476	19.1267	18.4588		19.9033	19.6358	19.6583
Q8R2P8	Lysosomal alpha-mannosidase	23	23	26.591	26.569	26.6339	25.8688	26.0081	26.0313	26.7512	26.8698	26.8285
O09159	Lysozyme C-1	4	4	19.651	19.8366	19.5848	19.5869	19.2631	20.8524		18.0817
P17897	Lysozyme C-2	8	5	25.0431	24.9564	25.4729	25.0347	25.3211	25.2829	25.5997	25.7271	25.8152
P08905	M-phase phosphoprotein 9	5	2	20.7107	20.409	20.5897	20.7007	20.7418	20.3037	20.5929	20.6685	20.5915
E9QPF8	Macrophage-capping protein	1	1
A6PWS5	Macrophage-capping protein (Fragment)	6	1		21.4171		20.9831	21.3512	21.53	21.1461	22.2806	21.7995
Q99LB4	Major vault protein	16	16	27.5371	27.4012	27.4487	26.9342	26.8539	26.8536	27.3456	27.2187	27.1902
Q9EQK5	Malate dehydrogenase, cytoplasmic	1	1	17.7575	17.9468	16.7589	15.2526	15.676	15.4581	15.4125	14.4593	13.5739
P14152	Malate dehydrogenase, mitochondrial	8	8	28.3122	28.2628	28.4024	24.6059	24.3804	24.607	27.5329	27.2802	27.2613
P08249	Maleylacetoacetate isomerase	10	10	28.6918	28.6419	28.8687	28.3909	28.2023	28.3257	29.1509	29.3497	29.2716
A0A1Y7VJZ2	Malignant T-cell-amplified sequence 1	9	9	26.8323	26.867	26.7661	26.2616	26.3793	26.4043	27.5582	27.48	27.5215
Q9DB27	Malonyl-CoA decarboxylase, mitochondrial	8	8	26.3985	26.362	26.2269	26.1671	26.4345	26.1767	26.8828	26.7665	26.769
Q99J39	Mammalian ependymin-related protein 1	1	1	18.7699	19.5293	19.1103
Q99M71	Mannan-binding lectin serine protease 1	1	1	23.498	23.2669	23.5042	23.014	23.4711	23.1765	22.4769	22.4128	22.4091
P98064	Mannan-binding lectin serine protease 2	12	12	25.5412	25.581	25.4444	25.6599	25.581	25.4763	25.4212	25.5597	25.2133
Q91WP0	Mannose-1-phosphate guanyltransferase alpha	15	15	25.4003	25.7455	25.7728	27.6998	27.372	27.3655	27.2302	27.7189	27.047
Q922H4	Mannose-1-phosphate guanyltransferase beta	9	9	23.77	23.6628	23.4278	23.9812	24.0136	24.1554	22.9075	22.4005	23.0531
Q8BTZ7	Mannose-binding protein A	2	2	20.8425	20.6625	20.6648	20.6831	20.5216	20.2051	19.5319	20.0697	20.1607
P39039	Mannose-binding protein C	4	4	22.7763	23.605	22.7455	24.0706	23.956	23.9904	23.8554	23.6801	23.833
P41317	Mannose-P-dolichol utilization defect 1 protein	2	2	24.1654	24.0171	23.868	24.1627	24.425	24.1392	23.2429	23.2833	23.1848
Q9R0Q9	Mannosyl-oligosaccharide 1,2-alpha-mannosidase IA	1	1
P45700	Mannosyl-oligosaccharide glucosidase	20	20	27.4374	27.3396	27.4751	27.4995	27.4484	27.6112	27.5912	27.7469	27.6589
Q80UM7	MAP kinase-activated protein kinase 2	7	7	24.6259	24.7047	24.4298	23.8204	24.066	23.9413	23.9579	23.5096	23.7119
P49138	MAP/microtubule affinity-regulating kinase 3	5	5	23.8529	23.8847	23.8719	24.2965	24.5677	24.4382	24.2894	24.2831	24.208
Q03141	MAP7 domain-containing protein 1	2	2				13.7855	13.9389	13.9042	14.997	15.2287	15.1093
A2AJI0	MARCKS-related protein	6	6	21.1883	22.0674	21.8221	19.3552	17.6904	19.1341	22.404	21.5299	21.6434
P28667	Mast cell protease 4	2	2	22.7096	22.6056	22.321	23.0057	22.9727	23.2566	22.9431	23.101	23.0231
Q3UN88	Mast cell protease-like protein	3	3		21.8907		22.7551	22.9464	22.9089
Q00356	Mast/stem cell growth factor receptor Kit	1	1	17.0485	16.9314	16.8641	17.1097	17.5274	16.8416	17.3503	17.2807	17.1546
P05532	Matrin-3	4	4	26.6787	28.509	29.6327	27.1324	28.0572	28.2063	28.5437	29.0946	29.2389
Q8K310	Matrix metallopeptidase 27	5	5	23.8629	23.9581	23.3547	22.4585	22.8038	22.6769	24.5403	24.5887	24.3219
D3YV89	Matrix metalloproteinase-19	1	1	23.0729	23.05	20.8392			22.6567	20.7863		20.6315
Q9JHI0	Max-like protein X	12	12	24.0675	24.5779	24.7885	25.1591	25.2098	25.4171	25.9733	26.0609	25.9455
A2BFB0	MBT domain-containing protein 1	1	1				15.6252			17.1985	16.3856	16.2624
Q6P5G3	Medium-chain acyl-CoA ligase ACSF2, mitochondrial	1	1
Q8VCW8	Medium-chain specific acyl-CoA dehydrogenase, mitochondrial	11	11	25.199	25.1747	25.2055	23.6496	23.438	23.5959	24.4166	24.6554	23.6521
P45952	Meiosis-specific coiled-coil domain-containing protein MEIOC	16	16	26.7602	26.7418	26.3057	25.4792	25.1196	25.2742	25.5474	25.2796	24.9593
A2AG06	Melanoma inhibitory activity protein 2	1	1
Q91ZV0	Melanoma-associated antigen D1	2	2	23.3697	23.2235	23.4983	23.7032	23.8775	23.4997	23.8561	23.7031	23.9203
Q9QYH6	Membrane progestin receptor beta	1	1	18.4869	18.3858	18.3397	17.7102	17.4762	17.4346	18.4913	15.5367	18.6792
Q80ZE5	Membrane-associated progesterone receptor component 1	1	1
O55022	Mesothelin	4	4	22.7912	22.6703	22.8491	22.6648	22.6861	22.8357	22.8668	23.0045	23.0275
Q61468	Metal cation symporter ZIP8	4	4	23.7543	23.5522	24.0654	23.8954	23.6628	23.6877	23.9874	23.6861	23.3269
Q91W10	Metalloproteinase inhibitor 2	2	2	17.8188	17.5834	17.5269		16.0919	14.6972
P25785	Metalloproteinase inhibitor 3	6	6	24.5434	24.4694	24.2602	25.0475	24.9415	25.2967	24.7525	24.6813	24.5223
P39876	Metalloreductase STEAP3	10	10	25.8762	26.4137	26.4186	22.7003	25.8957	24.4243	25.8091	25.5326	25.5369
A0A0R4J1G9	Metalloreductase STEAP4	1	1
Q923B6	Metaxin	1	1	19.9281	20.4239	19.8131	19.4363		19.066	20.397	20.0332	19.3514
Q8R5C0	Methanethiol oxidase	1	1	18.0711	18.7872	18.3661
P17563	Methionine adenosyltransferase 2 subunit beta	3	3	20.8574	20.8793	21.028		19.5759
Q99LB6	Methionine aminopeptidase 1	4	4	22.4343	21.5956	22.4936	19.6043	19.8607	19.832	21.5393	22.2032	21.1735
Q8BP48	Methionine aminopeptidase 2	5	5	20.8395	21.3231	21.6189			21.0041	21.5252	21.0008	21.4826
O08663	Methionine--tRNA ligase, cytoplasmic	12	12	26.1437	25.9388	26.1349	25.4213	25.267	25.1175	26.4341	26.4999	26.498
Q68FL6	Methyl-CpG-binding protein 2	17	17	25.1993	24.613	24.5872	24.4517	24.5399	23.8363	25.706	25.1147	25.3814
Q9Z2D6	Methylcrotonoyl-CoA carboxylase beta chain, mitochondrial	3	3	21.4978	21.4177	21.2051	17.2257	20.0978	20.224	20.773	20.9562	20.8986
Q3ULD5	Methylcrotonoyl-CoA carboxylase subunit alpha, mitochondrial	10	10	24.4516	24.4824	24.2546	23.7381	23.5101	23.4141	24.0783	23.7927	23.6094
Q99MR8	Methylglutaconyl-CoA hydratase, mitochondrial	4	4	20.7721	19.8952	20.8589
A0A0R4J023	Methylmalonate-semialdehyde dehydrogenase [acylating], mitochondrial	5	5	24.0882	24.4434	24.2985	22.2516	22.9895	23.3126
Q9EQ20	Methylmalonyl-CoA mutase, mitochondrial	16	15	27.212	27.1652	27.2576	27.3782	27.3347	27.3855	26.9048	27.2236	27.2068
P16332	Methylosome protein 50	10	10	23.8429	24.1927	24.1599	21.3041	21.4394	20.1629	21.9727	22.9607	23.0316
Q99J09	Methylthioribulose-1-phosphate dehydratase	1	1	17.8202	18.0731	17.1528			15.8028	17.7546	17.8061	17.6431
Q9WVQ5	Methyltransferase-like 7A1	4	4	21.5232	19.9834	18.8217				17.7738	16.6016
Q8C6B0	Methyltransferase-like protein 7B	9	9	25.2868	25.3535	25.4057	24.8922	24.9167	25.0058	25.7636	25.576	25.6613
Q9DD20	Mevalonate kinase	6	6	24.5813	24.5271	25.0042	24.1722	24.4704	24.484	26.1496	26.1852	26.1268
Q9R008	MICOS complex subunit Mic19	3	3	21.7314	19.0825	21.0687	17.3595	17.5568	17.0599	19.732	19.7101	19.5472
Q9D9P1	Microfibril-associated glycoprotein 4	1	1
Q9D1H9	Microsomal glutathione S-transferase 1	1	1	23.1091	22.7463	23.0711	21.7903		21.978
Q91VS7	Microsomal signal peptidase 12 kDa subunit	4	4	26.1512	25.955	26.0948	24.9906	24.5581	24.8118	25.4519	25.6647	25.5176
A0A2I3BRW0	Microsomal triglyceride transfer protein large subunit	1	1
O08601	Microtubule-actin cross-linking factor 1	11	11	25.6228	25.4259	25.1652	25.4297	25.1976	25.5339	25.4436	25.4214	25.2083
Q9QXZ0	Microtubule-associated protein 1S	28	28	28.0964	27.9249	28.1454	28.2745	28.3419	28.3657	29.2936	29.2802	29.286
A0A1D5RLY6	Microtubule-associated protein 4	3	3	23.2391	22.949	23.0775	23.9744	23.8147	18.4117	25.8705	25.5173	25.7698
P27546	Microtubule-associated protein 6	21	21	24.0732	24.1849	23.8324	24.8435	24.5578	24.6481	24.7195	25.0071	24.8023
Q7TSJ2	Microtubule-associated protein RP/EB family member 1	4	4	20.6733	21.4884	21.6294		12.9305	12.0849			19.9105
Q61166	Microtubule-associated protein RP/EB family member 2 (Fragment)	12	11	27.5666	27.8983	27.446	27.3714	27.3705	27.5066	27.9342	27.9494	27.8782
D3YYK8	Microtubule-associated protein RP/EB family member 3	7	6	26.0568	26.0849	25.8657	28.2919	28.2059	28.2418	27.0033	26.7525	26.8256
Q6PER3	Microtubule-associated proteins 1A/1B light chain 3A	7	5	23.7837	23.7594	23.5518	23.42	23.721	23.4397	24.0004	23.6847	23.5435
Q91VR7	Microtubule-associated tumor suppressor 1 homolog	1	1	21.2482	20.9511				20.7695	20.9823	21.0194	21.2242
Q5HZI1	Mimecan	2	2	20.2989	20.7329		19.5045		19.9915	20.1371		20.5737
Q62000	MIT domain-containing protein 1	6	6	24.3131	24.5827	24.3762	24.7443	24.6854	24.6203	23.7053	24.369	24.1896
Q8VDV8	Mitochondrial amidoxime reducing component 2	1	1
Q922Q1	Mitochondrial antiviral-signaling protein	10	10	26.0558	25.7654	25.8571	25.1405	25.2027	25.3282	25.6487	25.7622	25.5199
Q8VCF0	Mitochondrial carnitine/acylcarnitine carrier protein	1	1	19.0576	18.9944	18.5811
Q9Z2Z6	Mitochondrial fission 1 protein	1	1
Q9CQ92	Mitochondrial import inner membrane translocase subunit Tim13	2	2	20.2963	20.9178	20.1388	15.7368	17.8093		17.0381		17.5636
P62075	Mitochondrial import inner membrane translocase subunit Tim29	5	5	24.4379	24.057	24.1175	23.2553	22.7371	22.6479	22.7185	22.4524	22.1846
Q8BGX2	Mitochondrial import inner membrane translocase subunit TIM44	1	1	16.937	16.3225	14.8494
O35857	Mitochondrial import inner membrane translocase subunit TIM50	1	1	20.4205	20.2941	20.1083				20.3142	20.1927	19.8232
Q9D880	Mitochondrial import inner membrane translocase subunit Tim8 A	2	2	26.6629	26.6669	26.2531	26.7061	26.6603	26.5413	26.9451	26.8217	26.8445
Q9WVA2	Mitochondrial import inner membrane translocase subunit Tim8 B	2	2	21.1275	21.2091	20.9611		19.7724				20.9541
P62077	Mitochondrial import receptor subunit TOM34	1	1
Q9CYG7	Mitochondrial import receptor subunit TOM70	7	7	22.0535	23.2011	22.2329	22.6027	21.5866	22.7927	22.734	22.7424	22.8881
Q9CZW5	Mitochondrial proton/calcium exchanger protein	4	4
Q9Z2I0	Mitochondrial pyruvate carrier	6	6	23.0701	23.1152	23.5633	22.8345	23.1506	23.2494	20.8633	21.4527	20.5116
Q9D023	Mitochondrial pyruvate carrier 2	2	2	21.3016	21.1024	21.3188				20.1963		20.6043
D3YWY6	Mitogen-activated protein kinase	1	1	21.0217	21.1757	20.9233				19.0512	19.3563	19.3079
Q63844	Mitogen-activated protein kinase 3	6	6	20.8718	21.653	20.9489	20.5793	20.5738	19.2723		25.6945	18.7693
O08648	Mitogen-activated protein kinase kinase kinase	1	1				17.5327		17.1605	19.3884	19.3168	19.2516
Q3UPT4	Mitogen-activated protein kinase kinase kinase 4	1	1	19.7757	20.2855	20.4707	21.1509	21.3718	21.6515			20.601
E9PX30	Mitogen-activated protein kinase kinase kinase kinase 1	1	1
D3YXM8	Mitogen-activated protein kinase kinase kinase kinase 5	1	1
Q7TSJ7	Mitotic checkpoint protein BUB3	2	1	16.6751	16.4979	16.2253		16.1346	16.161	17.4038	17.6475	17.6
Q9WVA3	MOB kinase activator 1B	3	3	21.9846	21.9953	21.9579	20.9934			22.3774	22.3412	22.2378
Q8BPB0	MOB kinase activator 2	3	3	22.7759	22.4474	22.7106	20.9373	22.1475	20.9705	22.8516	23.0997	23.8589
A0A1B0GR18	MOB kinase activator 3A	1	1
Q8BSU7	MOB-like protein phocein (Fragment)	1	1
G8JL35	Moesin	1	1	18.7404	19.1011	19.4174					20.7618
P26041	Molybdenum cofactor biosynthesis protein 1	34	19	29.4	29.3651	29.1824	28.9238	28.7792	28.8826	29.8438	29.832	29.7936
Q5RKZ7	Monocarboxylate transporter 1	2	2		20.364	18.6465	23.7223	23.6341	23.5996	25.2552	25.2459	24.9648
P53986	Monoglyceride lipase	5	5	25.8366	25.766	26.0111	26.0134	26.0044	25.9219	25.9948	25.77	25.7643
D3YYS6	Motile sperm domain-containing protein 2	1	1
B1AU74	mRNA (2'-O-methyladenosine-N(6)-)-methyltransferase	1	1
P59114	mRNA cap guanine-N7 methyltransferase	1	1
Q9D0L8	Multifunctional protein ADE2	2	2	19.9809	20.4465	19.4241				19.6824	19.8766	19.7591
Q9DCL9	Multimerin-1	12	12	25.2034	26.3981	26.5582	26.0317	26.218	26.1105	27.3742	26.8945	26.9371
A0A0N4SVL8	Multivesicular body subunit 12A	20	20	22.7791	22.4339	21.5584	21.6259	21.5493	21.6103	25.3278	25.3787	25.1522
Q78HU3	Murinoglobulin-1	2	2	26.8197	26.7929	26.0835	26.8431	26.644	26.8076	24.2008	24.2213	24.025
P28665	Muscleblind-like protein 1	49	49	29.5872	29.6469	29.5255	30.0299	30.1626	30.3132	30.0153	30.0487	30.2884
A0A0A6YWB0	Musculoskeletal embryonic nuclear protein 1	7	7	24.6998	24.68	24.7547	23.634	23.8486	23.8941	24.3453	24.2548	24.2205
Q99JI1	Myelin expression factor 2	1	1
Q8C854	Myeloid cell nuclear differentiation antigen-like protein	3	3	23.1483	23.1035	22.6203	22.1591		22.0391	22.4391	22.2065	22.2613
D0QMC3	Myeloid differentiation primary response protein MyD88	10	6	25.9716	25.9531	25.5285	25.8651	25.8407	25.6742	26.8526	26.7698	26.579
P22366	Myeloid-associated differentiation marker	1	1	18.6505	18.7319	18.6227		18.189	17.8609
O35682	Myocyte-specific enhancer factor 2A	2	2	22.6853	22.5354	22.172	21.077	21.6363	20.3012	21.6698	21.3111	21.5749
S4R2H4	Myoferlin	1	1	17.0478	17.7779	17.1433
A0A286YDF5	Myoferlin	12	1	19.6105	19.7768	20.0637
E9Q390	Myoglobin	20	9	25.2303	25.4195	25.1733	24.2737	24.4627	24.4514	25.4395	25.3911	25.3381
P04247	Myosin light chain 1/3, skeletal muscle isoform	5	5	26.6328	26.5235	26.2105	24.2391	24.2514	24.1493	24.7617	24.91	24.6055
P05977	Myosin light chain 3	13	11	28.5246	28.4857	28.3928	28.4832	28.4072	28.2553	28.9569	28.7544	28.8418
P09542	Myosin light chain 6B	7	5	24.2982	24.1475	24.2257	23.3858	23.6855	23.678	24.2058	24.7798	23.9709
Q8CI43	Myosin light chain kinase 2, skeletal/cardiac muscle	3	2	21.3242	21.1036	20.8291	19.9565	20.1603	20.2686	21.2359	20.8997	20.7969
Q8VCR8	Myosin light chain kinase, smooth muscle	7	6	22.0884	22.0256	21.838	20.9154	20.7187	20.0662	21.6542	21.094	20.8157
Q6PDN3	Myosin light polypeptide 6	37	36	28.0374	27.9526	27.8822	27.0263	26.9348	27.1369	28.7567	28.5693	28.5583
A0A1W2P6F6	Myosin regulatory light chain 2, skeletal muscle isoform	10	8	27.9378	27.9403	27.9455	27.2598	27.1742	27.2512	27.8795	27.998	27.9535
P97457	Myosin regulatory light chain 2, ventricular/cardiac muscle isoform	13	13	29.2259	29.1069	29.0157	28.3589	28.8202	28.5251	29.2905	29.153	29.0476
P51667	Myosin regulatory light polypeptide 9	5	5	24.7252	24.5428	23.1824	25.1545	25.1597	25.2056	24.5199	24.5665	24.4693
Q9CQ19	Myosin XVIIIb	8	5	24.7744	25.4528	24.9864	24.4535	24.873	24.5741	25.2306	25.4059	25.0413
E9PV66	Myosin-1	1	1
Q5SX40	Myosin-10	105	16	28.5557	28.5723	28.5219	27.6117	27.6078	27.2241	28.752	28.8081	28.9317
Q61879	Myosin-11	60	43	27.5953	27.6374	27.5127	27.3818	27.3806	27.3191	27.6132	27.5456	27.4541
A0A338P6K2	Myosin-11	60	8	27.9545	27.8191	27.6424	27.2593	27.2488	27.2026	27.7406	27.3476	27.5973
O08638	Myosin-11	47	1
A0A2R8VHF9	Myosin-14	53	1
Q6URW6	Myosin-3	6	1	25.3638	25.4512	25.5718	24.4531	24.8407	24.8136	24.2298	24.0387	24.005
P13541	Myosin-4	43	3	24.6774	24.5223	25.0985	23.4347	23.5077	23.1718	23.4319	22.9532	22.7703
Q5SX39	Myosin-7	128	41	32.2982	32.2942	32.2631	31.8366	31.8322	31.8162	32.1645	32.1285	32.1704
Q91Z83	Myosin-8	56	24	25.1542	24.9946	24.751	24.1556	24.6158	24.2559	25.1454	25.0497	25.1313
P13542	Myosin-9	77	0
Q8VDD5	Myosin-binding protein C, fast-type	111	90	30.7348	30.7752	30.7649	30.3273	30.4641	30.4611	31.1045	31.0303	31.0204
Q5XKE0	Myosin-binding protein C, slow-type	46	45	27.3999	27.4052	27.4654	27.695	27.6471	27.6009	27.4665	28.9603	27.5588
Q6P6L5	Myosin, heavy polypeptide 13, skeletal muscle	52	51	29.2099	29.1088	29.1459	28.4982	28.4888	28.5521	29.0042	29.0409	29.1175
B1AR69	Myosin, heavy polypeptide 2, skeletal muscle, adult	31	0
G3UW82	Myosin, light chain 12A, regulatory, non-sarcomeric	98	20	26.9458	27.199	27.0203	26.2164	26.2877	26.2964	27.2375	27.3141	27.1323
Q6ZWQ9	Myotilin	8	5	27.9196	27.7612	27.8528	27.5426	27.2401	27.5657	27.7461	27.7403	27.4448
Q9JIF9	Myotubularin-related protein 4	4	4	22.2346	21.9562	22.1317	21.6974	22.307	21.8465
Q91XS1	Myotubularin-related protein 5	1	1				20.8933	20.1628		22.1099
Q6ZPE2	Myristoylated alanine-rich C-kinase substrate	2	2	15.7571		14.6917	14.8886	15.8311	15.2571	16.3906	16.503	15.8998
P26645	N-acetylated-alpha-linked acidic dipeptidase 2	12	12	25.8739	25.9456	25.2061	25.3836	25.3487	25.0717	25.7001	25.4646	25.5592
Q9CZR2	N-acetylgalactosamine kinase	10	10	25.6813	25.6077	25.7227	25.118	25.2055	25.063	20.5684	20.6233	21.4259
Q68FH4	N-acetyllactosaminide beta-1,3-N-acetylglucosaminyltransferase 2	9	9	23.8135	23.552	23.9818	24.1633	24.0094	23.9293	24.182	24.2	24.2135
Q9Z222	N-acetylneuraminate lyase	2	2				18.8465	19.1325	19.4441
Q9DCJ9	N-alpha-acetyltransferase 15, NatA auxiliary subunit	5	5	24.1207	24.1128	24.696	24.1148	24.0567	24.2303	24.2837	24.6531	24.4828
G3X8Y3	N-alpha-acetyltransferase 20	9	9	24.222	24.1347	24.1233	24.4518	24.6454	24.5071	24.38	24.1864	23.9212
P61600	N-alpha-acetyltransferase 25, NatB auxiliary subunit	2	2	18.7134			20.7741	21.1605	21.3893	21.3729	21.9974	22.0998
Q8BWZ3	N-alpha-acetyltransferase 50	1	1							20.1557		20.242
Q6PGB6	N-fatty-acyl-amino acid synthase/hydrolase PM20D1	6	6	24.9935	25.0398	24.9287	23.3598	24.124	23.5721	23.1238	23.3473	23.7779
Q8C165	N(G),N(G)-dimethylarginine dimethylaminohydrolase 2	4	4	19.4313	19.7126	19.6771	21.9437	20.1819	21.6088		20.2084	20.2862
Q99LD8	Na(+)/H(+) exchange regulatory cofactor NHE-RF1	1	1	20.098	20.1035	20.0645						18.3303
P70441	Na(+)/H(+) exchange regulatory cofactor NHE-RF2	20	20	28.1278	28.0737	27.8768	27.0191	26.0693	26.1031	27.9746	27.5965	27.3277
Q9JHL1	NAD-capped RNA hydrolase NUDT12	3	3	18.7723	20.8188	20.9575			18.2517	19.6245	19.7774	20.406
Q9DCN1	NAD(P) transhydrogenase, mitochondrial	4	4	21.9556	21.343	22.1073	21.1735		20.0272	20.7614		20.004
Q61941	NAD(P)H dehydrogenase [quinone] 1	10	10	24.4666	24.3914	24.4101	23.9102	23.5532	23.6551	24.1856	24.188	23.9922
Q64669	NAD(P)H-hydrate epimerase	6	6	22.334	22.1975	22.1231	22.6968	22.4016	22.8763	25.2255	23.3112	23.3006
Q8K4Z3	NADH dehydrogenase [ubiquinone] 1 alpha subcomplex subunit 10, mitochondrial	6	6	25.4893	25.2139	25.3918	20.6256	22.021	20.4517	23.5226	23.711	23.4914
Q99LC3	NADH dehydrogenase [ubiquinone] 1 alpha subcomplex subunit 12	3	3							19.1917	18.0857	18.3147
F6RBR6	NADH dehydrogenase [ubiquinone] 1 alpha subcomplex subunit 13	2	2	21.2648	21.2886	21.4988				15.891	16.3629
Q9ERS2	NADH dehydrogenase [ubiquinone] 1 alpha subcomplex subunit 2	2	2	22.1147	22.0777	22.9088		19.1362	19.2081	19.8459	20.2761	21.0002
Q9CQ75	NADH dehydrogenase [ubiquinone] 1 alpha subcomplex subunit 5	3	3	21.0625	21.1903	20.8559	19.6286	19.2547
Q9CPP6	NADH dehydrogenase [ubiquinone] 1 alpha subcomplex subunit 8	3	3		19.1802
Q9DCJ5	NADH dehydrogenase [ubiquinone] 1 beta subcomplex subunit 10	3	3
Q9DCS9	NADH dehydrogenase [ubiquinone] 1 beta subcomplex subunit 3	2	2	21.5237		21.382	21.2605	21.737	21.5468	21.6009	21.3248	21.5042
Q9CQZ6	NADH dehydrogenase [ubiquinone] 1 beta subcomplex subunit 4	2	2	20.825	20.5945	20.4659
Q9CQC7	NADH dehydrogenase [ubiquinone] 1 beta subcomplex subunit 5, mitochondrial	2	2
Q9CQH3	NADH dehydrogenase [ubiquinone] 1 beta subcomplex subunit 7	2	2	20.9949		21.7806
Q9CR61	NADH dehydrogenase [ubiquinone] 1 beta subcomplex subunit 8, mitochondrial	2	2	20.548	20.7132	20.4486				21.3797	20.1551	20.3694
Q9D6J5	NADH dehydrogenase [ubiquinone] flavoprotein 1, mitochondrial	1	1	19.995	20.2275	20.4049	20.2225
Q91YT0	NADH dehydrogenase [ubiquinone] iron-sulfur protein 2, mitochondrial	4	4	22.2888	22.4426	21.6481	21.9846	20.5136	22.7924		20.1793	23.8772
Q91WD5	NADH dehydrogenase [ubiquinone] iron-sulfur protein 4, mitochondrial (Fragment)	1	1	21.3718	21.2983	21.2282	20.716	20.799	20.5558
A0A338P7A0	NADH dehydrogenase [ubiquinone] iron-sulfur protein 5	2	2			19.6343				20.7483	20.4355	19.6638
Q99LY9	NADH dehydrogenase [ubiquinone] iron-sulfur protein 8, mitochondrial	2	2	20.225	20.0568	19.629	14.9635	17.5528	18.1188	23.2257	23.1974	22.9484
Q8K3J1	NADH-cytochrome b5 reductase 3	1	1
Q9DCN2	NADH-ubiquinone oxidoreductase 75 kDa subunit, mitochondrial	10	10	25.0981	25.507	25.1398	24.0107	23.9371	24.1302	24.4771	24.7085	24.5404
Q91VD9	NADP-dependent malic enzyme	1	1
P06801	NADPH--cytochrome P450 reductase	10	10	25.5565	25.538	25.6661	22.9214	23.0444	23.1326	24.7007	24.2155	24.3516
P37040	NADPH:adrenodoxin oxidoreductase, mitochondrial	12	12	25.8599	25.954	25.8188	25.3673	25.1366	25.2992	26.2724	26.0879	25.9484
Q61578	Nascent polypeptide-associated complex subunit alpha, muscle-specific form	6	6		21.3869	20.6961	20.404	20.6334	20.9522
P70670	Nck-associated protein 1	17	17	26.9414	26.9129	26.9003	27.217	26.8598	26.9515	27.7462	27.6714	27.6249
P28660	NCK-interacting protein with SH3 domain	17	17	23.4254	22.595	23.6504	21.786	21.9164	20.5197	22.8479	22.7154	22.4934
Q9ESJ4	NEDD8 ultimate buster 1	1	1	14.9712	15.1267	14.4832	13.8679	14.0403	13.6096
P54729	NEDD8-activating enzyme E1 regulatory subunit	11	11	22.6412	22.6163	22.6168	23.4589	23.2191	22.9773	23.7283	23.8849	22.9016
Q8VBW6	NEDD8-conjugating enzyme Ubc12	1	1
P61082	Nesprin-1	8	8	24.1565	24.9038	24.6863	24.1564	24.4947	24.3964	23.9583	24.4516	24.166
A0A1L1STC6	Nesprin-2	1	1	19.4069	19.5739	19.5116		18.9894	18.8056
Q6ZWQ0	Nesprin-3	6	6	23.8825	24.1579	23.8144	24.7135	24.6649	24.3475	23.9289	23.8223	23.8457
Q4FZC9	Nestin	1	1
Q6P5H2	Neural cell adhesion molecule 1	1	1	20.9826	21.0917	20.4153	21.309	21.3727	21.1768	21.8048	21.4852	21.3011
E9QB01	Neurochondrin	1	1		20.4978	19.8729	20.0964
Q9Z0E0	Neurogenic locus notch homolog protein 3	1	1	18.5162	18.064		20.8998	19.2601		19.3255	19.5497	18.9218
Q61982	Neuron-specific calcium-binding protein hippocalcin	2	2	25.0978	24.9613	24.8074	24.5022	24.3767	24.5301	24.8085	24.7729	24.573
P84075	Neuronal membrane glycoprotein M6-a	4	1
P35802	Neuronal proto-oncogene tyrosine-protein kinase Src	6	6	24.0795	24.4703	24.6756	23.5375	24.1513	23.8877	24.0687	23.6909	24.0939
P05480	Neuropeptide-like protein C4orf48 homolog	2	1	24.6566	24.5887	24.357	24.371	24.3546	24.2237	25.4018	25.1858	25.2196
Q3UR78	Neuropilin-1	1	1
P97333	Neuroplastin	10	10	26.0478	25.9014	26.0398	25.1375	24.8825	25.442	25.8776	25.8645	25.7831
P97300	Neutrophil cytosol factor 1	2	2	21.7694	21.6581	21.7334		19.8895	20.2346	20.7273	20.3223
Q09014	Neutrophil cytosol factor 2	1	1		16.2243	16.2345				15.0951	15.0401	14.8082
O70145	Neutrophilic granule protein	3	3	20.3779	20.4725	20.4429					20.7187	20.7481
O08692	NHL repeat-containing protein 2	2	2	21.506						22.4546	21.7383	21.9755
Q8BZW8	NHP2-like protein 1	1	1			16.5331	15.4903	16.0009		16.4787	16.3699	16.1838
Q9D0T1	Nicotinamide phosphoribosyltransferase	6	6	24.452	24.4137	24.7101	23.5351	23.5855	22.8512	24.4153	24.3118	24.4809
Q99KQ4	Nicotinate phosphoribosyltransferase	21	21	26.7215	26.3691	26.4116	26.5739	26.6821	26.1344	27.336	27.3564	27.3659
Q8CC86	Nicotinate-nucleotide pyrophosphorylase [carboxylating]	13	13	26.4703	26.3053	26.1908	24.7869	25.6426	25.4964	26.0197	27.4675	25.8979
Q91X91	Ninjurin-1	12	12	25.7909	25.7721	25.8465	23.7234	23.085	23.1043	25.2983	25.3205	25.2501
[truncated: 1,218 more rows]

## Sheet: S2
Table S2. List of identified proteins from P-EVs.
Accession	Description	# Peptides	# Unique Peptides	E-cEV (log2Abundance_1)	E-cEV (log2Abundance_2)	E-cEV (log2Abundance_3)	E-vEV (log2Abundance_1)	E-vEV (log2Abundance_2)	E-vEV (log2Abundance_3)	E-CRiSP-EV (log2Abundance_1)	E-CRiSP-EV (log2Abundance_2)	E-CRiSP-EV (log2Abundance_3)
Q99M31	Heat shock 70 kDa protein 14	5	5	26.2532	18.0614	26.0486	19.1188	27.0637	18.9223	17.5676	16.7197	16.8368
Q9EST4	Proteasome assembly chaperone 2	5	5	19.0137	18.0566	18.8828		16.6088	19.6944			14.2709
Q9EQK5	Major vault protein	2	2		19.8582		20.0914	21.035	21.0623	15.9247
Q8VE88	Protein FAM114A2	3	3	20.5124	20.7061	20.8917	21.0409	21.2219	20.9771	17.0175	16.6519	17.1809
A0A1D5RMM8	Paxillin	4	4	22.0246	25.0028	24.8975	21.7768	21.5249	22.1769	20.9931	21.2855	20.757
Q60953	Protein PML	1	1	21.8733	21.7692	21.4763					18.2927
P97467	Peptidyl-glycine alpha-amidating monooxygenase	6	6	22.1319	22.329	22.2738	22.0223	21.7758	21.8798	19.5617	17.2803	19.4114
Q99L90	Microspherule protein 1	1	1	21.0105	20.9826				19.5242			18.2084
Q3V1V3	ESF1 homolog	1	1	15.8244	15.5551	15.0334		14.6293			12.8644
P0DOV2	Interferon-activable protein 204	6	6	21.6819	21.168	21.1114	19.989	20.6657	20.2355	18.3985		19.008
Q6KAR6	Exocyst complex component 3	8	8	20.3226	23.5242	21.5595	21.0043	21.8429	21.8763		19.7759	19.8232
Q91VJ2	Caveolae-associated protein 3	4	4		19.5058		20.3762	20.1902	20.1404			17.0534
Q8BJ64	Choline dehydrogenase, mitochondrial	5	5			21.4654	21.9012	21.4568	19.6308			19.1881
Q3U9G9	Delta(14)-sterol reductase LBR	2	2	21.2915	20.9869	21.3492	20.2478	21.2954	21.1228	18.992	18.8973
Q8CCP0	Nuclear export mediator factor Nemf	5	5	19.0211	18.9287	18.325	16.5807	18.9161	19.2762	16.5177
Q6PHQ8	N-alpha-acetyltransferase 35, NatC auxiliary subunit	4	4	24.1567	24.1829	24.0635	21.9246	24.6233	22.077	21.9878	21.6645	21.9248
D3YW09	Splicing factor 3A subunit 2	3	3	21.1007	21.3964	21.1567	21.2469	20.9075	20.5253	18.8518	19.1966	19.0168
Q5F258	ARF GTPase-activating protein GIT1	4	3	15.0067	16.5605		16.2294	16.382			14.0336
Q8K2V6	Importin-11	7	7	20.691	22.1459	20.5996	21.5414	20.6575	20.6741	19.5161	18.7605	19.7737
Q9EQ32	Phosphoinositide 3-kinase adapter protein 1	5	5	21.7209	21.8171	21.5525	21.5481	21.6256	22.0644	18.9865	19.6453	20.4142
Q8BK67	Protein RCC2	10	10	22.5343	22.7715	23.0889	22.6264	20.9924	21.8663	20.5351	21.3007	20.9874
Q8K4Z5	Splicing factor 3A subunit 1	14	14	23.1881	22.703	22.847	22.238	22.5142	22.7857	20.7651	21.4653	20.9676
L7N245	Sulfotransferase	11	2	20.6581	20.839	20.0447	19.3624		20.1105		18.7267
O35386	Phytanoyl-CoA dioxygenase, peroxisomal	3	3	19.0298	20.8193	18.4897	21.3242	17.919	21.4497	18.5859		17.1712
P09055	Integrin beta-1	8	8	22.0613	21.7979	21.7529	22.1885	21.8614	21.878	20.8071	19.0935	19.9714
Q99K28	ADP-ribosylation factor GTPase-activating protein 2	8	8	21.5417	21.2456	21.3039	22.0442	22.6322	21.9102	19.9265		19.2505
Q8K0Q5	Rho GTPase-activating protein 18	10	10	25.7985	23.5571	23.7408	23.0073	22.8164	22.6777	22.8475	23.0302	23.1668
E0CXR0	Bax inhibitor 1 (Fragment)	3	3	25.4949	25.9268	25.4143	26.0738	25.7063	25.6915	24.2652	24.023	23.5538
P37804	Transgelin	1	1		18.1719	19.2358	19.2294		18.9321		17.1485
Q99NB9	Splicing factor 3B subunit 1	8	8	21.5465	21.5148	21.5264	21.0761	21.4003	22.0761	19.7104	18.4093	20.7776
A0A0R4J0G6	Glutaminyl-peptide cyclotransferase	3	3	21.0437	20.4998	20.7714	20.1547	18.1905	20.4476	20.0482	17.8599	18.8908
Q8R3R8	Gamma-aminobutyric acid receptor-associated protein-like 1	5	5	24.4859	25.4795	25.4368	23.8198	24.9585	24.3679	23.5336	23.1595	24.0514
F8WJ93	Echinoderm microtubule-associated protein-like 4	4	4	20.8647	20.5958	20.7502	18.9101	18.9301	21.7701	18.1503	17.6107	20.3198
Q9DCJ9	N-acetylneuraminate lyase	3	3	20.973	21.7009	20.9925	21.9951	21.587	21.6159	20.0129		19.3947
Q61646	Haptoglobin	11	11	25.6281	25.5733	25.4916	22.9401	23.2368	23.2446	23.9567	24.0977	24.0887
Q99LI8	Hepatocyte growth factor-regulated tyrosine kinase substrate	4	4	20.0898	20.6243	20.7044	21.4046	21.5889	21.2719	19.3796	19.3465	17.6867
Q9QZI9	Serine incorporator 3	4	4	20.2233	19.2436	20.9263	21.3031	21.9988	21.9232	18.9946	17.7393	19.2114
P41105	60S ribosomal protein L28	2	2	21.8839	22.0364	24.4317	22.1945	22.4328	22.3858	21.6987	21.5653	22.0477
P49138	MAP kinase-activated protein kinase 2	6	6	23.0885	24.7199	24.3396	22.5315	22.5548	24.527	22.5274	22.5989	22.9248
Q8C650	Septin-10	8	4	20.2661	21.2663		19.7189	20.4428	20.1332	19.7792	19.8707	17.1186
Q8K268	ATP-binding cassette sub-family F member 3	4	4	20.4507	20.4804	20.6252	18.7233	20.6844		19.0188
P54227	Stathmin	3	3	20.9963	20.9679	23.0411	22.7063	22.5675	22.6186	20.5859	20.7326	20.276
P97393	Rho GTPase-activating protein 5	4	4	19.7229	18.675	18.3609	20.839	20.98	20.8613		17.277	17.8268
Q9JJV2	Profilin-2	2	2	24.7459	24.4857	24.7165	25.1542	23.4872	24.3709	23.1279	23.4517	22.9875
A0A338P7B7	Dynein light chain Tctex-type 1A	2	2	21.3694	21.3793	21.4553	20.7261	21.1416	20.265	20.0629		19.8784
Q922V4	Pleiotropic regulator 1	5	5	21.7625	21.5576	21.7282	21.6711	21.573	21.2896	20.6106	20.0654	20.0269
Q3UIA2	Rho GTPase-activating protein 17	9	9	22.6697	22.5859	22.6872	22.326	21.4112	22.7766	21.908	19.9609
A6H5X4	PHD finger protein 11	3	3	18.2885	18.2961	17.9094	18.027	17.7972	18.1367	17.6405	15.5651	16.355
O35945	Aldehyde dehydrogenase, cytosolic 1	24	14	29.7476	29.5367	29.0638	29.129	29.0221	29.3246	27.797	27.8928	28.458
Q8VDU3	Apol9a protein	5	5	23.8546	24.0055	23.7038	23.376	23.504	23.1677	22.4872	22.5378	22.3681
G3X9C2	F-box only protein 50	1	1	17.1082	18.7087	16.6065	17.9802	17.7749	17.416	17.0045		15.2437
Q924H7	WW domain-containing adapter protein with coiled-coil	2	2	18.3569	17.8488	16.5848	18.1166	18.0672	17.8336	16.6728	16.21	16.2601
Q9CR41	Huntingtin-interacting protein K	1	1	21.7795	21.6227		21.2003					20.3487
Q8R1X6	Spartin	5	5	22.3387	22.3373	22.4263	22.0337	21.7171	22.1868	20.2858	21.1076	21.4306
Q6PDQ2	Chromodomain-helicase-DNA-binding protein 4	6	6	21.4891	21.5398	21.6223	21.1079	21.5412	21.5472	21.2725	18.9273	19.2923
Q9DBU3	Serine/threonine-protein kinase RIO3	1	1		20.8481					19.9297	18.9835
Q8CI33	CWF19-like protein 1	6	6	22.3758	22.1607	22.2491	20.4602	20.7566	20.543	21.4443	20.6351	20.6198
P57784	U2 small nuclear ribonucleoprotein A'	1	1	20.4396		21.1408	19.5784	19.3118		19.3103	19.6073	19.6329
Q8VI93	2'-5'-oligoadenylate synthase 3	14	14	22.7183	22.153	22.9065	22.3155	22.4528	22.8123	21.0316	21.4938	21.391
A0A5F8MP96	Septin-4	7	7	21.8816	21.8668	21.7515	21.5807	21.1337	22.0115	20.7956	19.9645	20.7076
Q8R5F3	ADP-ribose glycohydrolase OARD1	3	3	21.576	20.4645	20.4958	20.3627	19.0999	19.3794	20.0636	19.9847	18.5354
Q9R1T4	Septin-6	13	5	22.3597	22.3597	22.7025	21.3207	22.1096	21.9981	21.765	19.7633	21.484
Q60766	Immunity-related GTPase family M protein 1	4	4	21.0808	20.7178	20.9614	21.2443	21.1418	21.2437	19.1872	19.9546	19.8191
Q8VE18	Protein SMG8	1	1	14.6022	14.8588	14.136	14.3296	13.5762			12.6729	13.8009
G3UWY3	Protein cordon-bleu	1	1	14.5859	13.3286	14.6629					13.0898
P50228	C-X-C motif chemokine 5	1	1	22.7399	21.8251	22.2884	19.81			21.8368	20.2278	20.8299
Q3UUG6	TBC1 domain family member 24	7	7	21.0456	19.2083	18.9907	19.07	18.74	19.5061	18.5718	18.5654	19.3232
Q99J08	SEC14-like protein 2	6	6	22.7392	22.8567	22.5924	22.4023	22.5855	22.3538	21.3908	21.4824	21.731
V9GX43	CUGBP Elav-like family member 2 (Fragment)	6	6	22.6699	22.1204	22.0388	21.4644	22.5602	22.3355	20.321	21.3973	21.3976
O08609	Max-like protein X	1	1	17.9679	17.9192	17.7946	18.0264	17.4385	17.8728	16.9989	16.4853	16.6306
G3UZ34	116 kDa U5 small nuclear ribonucleoprotein component	8	6	21.5414	19.7992	21.2646	21.2141	21.7914	21.2457	19.3448	19.4861	20.5057
P17742	Peptidyl-prolyl cis-trans isomerase A	6	6	23.3127	23.9562	23.7205	23.6061	23.43	23.4463	22.6544	22.475	22.4378
F6ZQI5	Fibrous sheath-interacting protein 2 (Fragment)	1	1	21.0732	16.2972	15.9991				15.4093	17.2682	19.698
Q99K30	Epidermal growth factor receptor kinase substrate 8-like protein 2	11	11	22.6425	22.5599	22.479	21.9481	21.8832	22.0587	21.374	21.3381	21.4904
P09036	Serine protease inhibitor Kazal-type 1	2	2	23.1648	23.017	22.7293	22.6885	22.0381	21.9093	21.9121	21.7089	21.8719
Q3U0A6	Globin d1	3	3	19.9454	19.8877	20.4563	20.2073	19.9307	20.2038	19.3393	18.6551	18.8363
Q569Z6	Thyroid hormone receptor-associated protein 3	5	5	21.2002	21.1597	20.7613	20.7318	21.1574	21.4135	19.0626	20.7022	19.4173
Q8C7R4	Ubiquitin-like modifier-activating enzyme 6	8	8	21.1081	20.5129	20.6399	20.5032	19.6857	19.6436	19.0327	18.7123	20.4922
A0A087WPW5	Kinectin	12	12	20.9113	20.396	20.8409	19.6971	19.9072	20.0872	19.019	19.8023	19.8223
Q8CHC4	Synaptojanin-1	5	5	20.1192	20.9325	21.6972	21.5352	21.5352	21.6197	19.6185	20.4335	19.5108
O08576	RUN domain-containing protein 3A	1	1	20.4861		19.9888				19.1192
D3Z0V2	Rho guanine nucleotide exchange factor 7 (Fragment)	7	6	21.9519	21.4031	21.6683	21.3949	21.5799	22.115	20.2785	20.797
Q62151	Advanced glycosylation end product-specific receptor	3	3	19.9157	20.7311	20.6702	21.319	22.3773	21.9656	19.6862		18.926
O70475	UDP-glucose 6-dehydrogenase	23	23	29.0285	29.0666	29.1939	28.1192	28.1172	28.1029	28.1019	27.8729	27.9347
Q9D281	Protein Noxp20	1	1		20.5047	20.6569	20.0269	19.7554	20.245	19.3911	18.9312	19.9105
Q3UBZ5	MIF4G domain-containing protein	1	1	21.5569	21.4031	21.8527	20.2441	19.6598	19.5073	20.0828	20.7206	20.6405
O09158	Cytochrome P450 3A25	8	8	22.2699	21.8926	20.7594	22.7053	19.9716	20.0666	20.6236	20.6984
O54909	Retinol dehydrogenase 16	9	1	20.6683	21.9155	21.9021	21.3342	21.947	22	20.7114	20.4203	20.3175
E9QLG3	MAX gene-associated protein	1	1	18.4319	18.2902	17.8275	17.0099	17.2202	17.2107	17.6256	16.3071	17.0684
Q8CAQ8	MICOS complex subunit Mic60	1	1	14.3668	14.5565	13.8539	15.4367	14.9304	15.4135		12.5772	13.6052
Q9JLM9	Growth factor receptor-bound protein 14	2	2	21.6459	21.4489	22.1982	21.2698	17.4445	21.4361	20.4416	20.8113	20.8093
Q920Q6	RNA-binding protein Musashi homolog 2	3	3	22.3187	22.3623	21.9367	21.4506	21.9747	21.3432	20.6636	21.119	21.47
G3UYU5	Ribonuclease P protein subunit p40	1	1	18.7363		17.7476	17.6147	17.7615		17.6586	16.8895	17.0555
P62996	Transformer-2 protein homolog beta	7	7	22.4829	22.7796	23.0817	22.0486	22.0954	22.5105	21.7638	21.3305	21.9963
Q99J09	Methylosome protein 50	3	3	20.6377	20.6946	20.3102	20.4475	20.4939	20.0829	19.6276	19.2151	19.5591
Q9WU78	Programmed cell death 6-interacting protein	13	13	23.9972	24.1058	24.0058	24.3902	23.2016	23.6538	22.8756	22.8305	23.1716
Q9CRT8	Exportin-T	6	6	20.1667	20.3028	20.0985	20.7527	20.6871	20.4385	19.8411	18.7391	18.3704
F6V6T4	Transmembrane emp24 domain-containing protein 2 (Fragment)	3	3	21.2422	21.0738	20.9808	19.9236	21.3945	21.4205	19.5356	20.3271	20.153
Q9D0B6	Protein PBDC1	3	3	22.8949	22.6752	22.7907	22.1325	22.343	22.2373	22.1138	21.54	21.443
O35841	Apoptosis inhibitor 5	10	10	24.7433	24.9667	25.177	24.6967	24.8642	24.5595	23.8111	23.8401	24.1003
A0A0R4J083	Long-chain specific acyl-CoA dehydrogenase, mitochondrial	9	9	22.5393	22.7659	23.1748	23.471	23.8641	23.6346	21.8465	22.0919	21.3822
O35566	CD151 antigen	2	2	20.5652	20.7158	20.2508	20.1943	20.082	20.2612	20.0112	18.6943	19.4306
Q8R0S2	IQ motif and SEC7 domain-containing protein 1	6	6	21.17	21.4392	20.9575	20.8207	20.8294	20.7536	21.3056	18.3366	19.1809
A0A2R8VI30	Integrin-associated protein	3	3	22.0274	22.0883	21.7284	23.2926	23.4698	23.6644	20.5756	21.6036	20.1983
P97864	Caspase-7	6	6	21.374	21.4246	21.328	21.4309	21.6668	20.7916	20.2062	19.8167	20.8355
Q69ZK0	Phosphatidylinositol 3,4,5-trisphosphate-dependent Rac exchanger 1 protein	1	1	18.0673	18.3964	18.1958	18.5526	18.1085	18.3551	17.6427	15.7778	17.5468
P10833	Ras-related protein R-Ras	2	1	20.8782	20.4299	20.627	20.5638	20.5619	20.6083	19.9229	19.8908	18.8557
P70268	Serine/threonine-protein kinase N1	9	9	20.9138	20.8061	20.7954	20.7398	20.793	20.4764	20.1531	19.6024	19.6299
Q8R379	GTPase, IMAP family member 7	6	6	18.366	18.6189	18.3562	18.6249	19.0936	18.9087	17.4338
Q921E2	Ras-related protein Rab-31	2	1	19.3335	18.9222	19.3737	18.3568	18.4016	19.1199	17.6941	18.2065	18.5832
Q924X2	Carnitine O-palmitoyltransferase 1, muscle isoform	2	1	18.6752		18.4057	17.8407	18.5048	18.1764	17.5761		17.482
Q9QUM9	Proteasome subunit alpha type-6	2	2		20.8171	20.7585	20.1704		20.007	19.9962	19.5264
E9PUZ0	Apolipoprotein L 11b	6	6	22.4279	22.4261	22.2353	21.3538	21.3409	21.68	21.5082	21.042	21.4791
Q9CYG7	Mitochondrial import receptor subunit TOM34	4	4	21.0547	21.4956	20.8392	20.5791	20.9849	21.1635	20.365	20.6028	19.0551
Q6PHN9	Ras-related protein Rab-35	7	5	23.7441	23.7633	23.427	23.1212	22.9494	22.9222	22.7476	22.4271	22.7793
Q8BFW4	Tripartite motif-containing protein 65	1	1	16.0345	15.8622	14.9616	16.0631	15.9658	16.0005	15.0694	14.2019	14.6933
Q3UJB0	Splicing factor 3b, subunit 2	6	6	19.8429	21.7288	21.9202	21.2102	21.2779	21.24	20.6175	19.7799	20.7084
Q61823	Programmed cell death protein 4	5	5	23.1442	22.9535	22.1794	23.4526	23.2901	23.0951	21.6784	21.7046	22.0635
Q91VC3	Eukaryotic initiation factor 4A-III	10	9	27.002	26.742	26.9388	26.259	26.218	26.2623	25.8109	26.1968	25.7034
Q8BYA0	Tubulin-specific chaperone D	4	4	20.601	21.0712	20.8245	21.0273	21.2917	21.1581	18.2193	19.6602	20.7361
P46935	E3 ubiquitin-protein ligase NEDD4	13	13	27.5122	28.3864	28.3017	26.4772	26.3731	27.0489	27.1108	27.121	27.2096
Q03963	Interferon-induced, double-stranded RNA-activated protein kinase	7	7	22.9458	23.0988	23.0589	22.2742	22.6083	22.3981	22.0764	22.1174	22.0102
Q9CZ52	Anthrax toxin receptor 1	8	7	22.17	22.1623	22.0982	21.5787	21.6407	21.6588	21.6458	20.422	21.2116
Q03141	MAP/microtubule affinity-regulating kinase 3	2	2	15.2287	16.4828	16.3504	16.157	16.1565	15.0513	14.8049	15.0972	15.4885
Q570Y9	DEP domain-containing mTOR-interacting protein	5	2	22.6062	22.8648	22.8212	22.6833	22.8576	22.975	21.8177	21.3938	22.1267
P11369	LINE-1 retrotransposable element ORF2 protein	1	1	15.8983	15.4909	15.7028	15.4991	15.2825	15.4131	13.2012	15.0819	15.2427
O08914	Fatty-acid amide hydrolase 1	3	3	20.0355	19.7953	20.9174	22.3329	22.5756	22.3569	19.0902	19.4183	19.5932
P54310	Hormone-sensitive lipase	24	24	25.4767	25.3221	25.3992	25.1246	25.3331	25.1196	24.5474	24.3422	24.4779
A9YVJ5	Guanylate binding protein 11	11	9	22.7392	22.7162	22.9376	22.7676	22.6822	22.694	21.7908	22.0051	21.7733
P18526	Ig heavy chain V region 345	5	1		21.1093	20.7229	21.024	21.0206	20.9698	19.8206	19.7948	20.2937
Q80YA3	Phospholipase DDHD1	1	1	23.1794	22.9925	23.104	22.5629	22.3946	22.5027	22.0668	22.3077	22.0757
Q60584	F-box/WD repeat-containing protein 2	1	1	22.4912	21.9319	22.4968	21.8522	21.582	21.7785	21.785	21.0813	21.2084
Q64282	Interferon-induced protein with tetratricopeptide repeats 1	9	9	23.6288	23.2904	23.5815	23.3499	23.4812	23.5242	21.1846	20.3859	23.8407
A2A974	Cytochrome P450 4A12B	4	1		19.9779	20.1477	20.7331	20.317	20.4863		19.1204	19.1567
Q5SFM8	RNA-binding protein 27	1	1	18.2148	18.2643	17.8458	17.5927	17.2577	17.6507	18.0269	16.3966	16.5919
Q924C1	Exportin-5	6	6	19.8777	19.9143	19.5268	19.5593	20.6971	20.9543	18.8041	18.4788	19.2193
Q9WV68	Peroxisomal 2,4-dienoyl-CoA reductase [(3E)-enoyl-CoA-producing]	8	8	23.2253	23.1018	23.076	23.2963	23.6833	23.4923	22.2769	21.9125	22.4483
Q03160	Growth factor receptor-bound protein 7	1	1	19.4716		19.1514					18.419
Q3TIV5	Zinc finger CCCH domain-containing protein 15	8	8	22.3597	22.582	22.144	21.8856	21.887	21.9158	22.2042	20.4074	21.2602
A0A571BGG1	SH3 domain-containing protein 19	3	3	15.1874		14.8225			14.4976	14.5427	13.4679	14.1615
A0A5K1VVS7	Protein unc-45 homolog A	9	9	22.1367	22.3165	20.9267	20.3908	20.3526	20.4063	21.1192	20.8756	21.0526
P04370	Myelin basic protein	1	1	23.0253	23.0113	22.759	21.9837	22.0447	21.8701	21.9537	22.0314	22.1482
Q9R0G6	Cartilage oligomeric matrix protein	2	1	17.9507	17.9451	17.7385	17.8443	17.051	17.2562	17.324	16.5187	17.0338
Q60596	DNA repair protein XRCC1	1	1	17.1371	17.2726	17.1899	16.8951	16.4321	16.4198		15.8218	16.6982
Q921W0	Charged multivesicular body protein 1a	4	4	23.0868	23.3853	23.1988	22.7651	22.8206	22.7704	22.5003	21.7859	22.6546
P57759	Endoplasmic reticulum resident protein 29	5	5	20.1938	21.9478	21.5288	22.4105	22.1045	22.4644	20.6226	20.731	20.1705
Q99LD9	Translation initiation factor eIF-2B subunit beta	4	4	22.8674	22.4624	22.9878	23.0934	23.0493	22.7379	21.2836	22.3095	21.9942
Q61510	E3 ubiquitin/ISG15 ligase TRIM25	15	15	24.6981	24.6964	24.6385	24.6011	24.7715	24.6222	23.8963	23.9446	23.5802
O08583	THO complex subunit 4	2	2	20.9133	20.9079	20.7681	21.0331	20.9777	20.9898	19.9046	19.5455	20.4444
Q6P572	Phosphatidylinositol-3,5-bisphosphate 3-phosphatase	2	2	20.3316	20.1072	20.2886	20.069	20.0931	20.4101	19.6403	19.1
Q99KP6	Pre-mRNA-processing factor 19	10	10	24.1796	23.7584	24.2558	23.8852	23.9402	23.8797	23.1	23.5529	22.9711
Q61249	Immunoglobulin-binding protein 1	1	1	22.0757	21.9912	22.1151	21.8504	21.6548	21.8955	21.3404	21.3151	20.9499
Q9JLV6	Bifunctional polynucleotide phosphatase/kinase	9	9	21.7653	21.6595	22.0035	20.4731	20.3858	21.6892	21.1041	20.2087	21.3578
P61358	60S ribosomal protein L27	3	3	22.2858	22.2049	22.1789	22.2351	22.2652	22.3213	21.8498	20.8791	21.2276
A0A0R4J086	Olfactomedin-like protein 3	9	9	22.5988	22.6627	22.8814	22.24	20.8877	21.646	22.001	21.8255	21.7795
P56960	Exosome component 10	1	1	19.0112		18.9388			18.5763	18.3912	17.988	17.9766
A0A0G2JEW4	Pre-mRNA-splicing factor 38B	1	1		19.871	19.3402	19.4453		18.7163	18.674	18.5912	19.055
Q3TMQ6	Angiogenin-4	1	1	20.7444	21.0419	20.5976	20.2286	20.4478	20.5163	19.9401	19.8257	20.1189
P23249	Putative helicase MOV-10	1	1	19.7992	20.1641	19.5027	18.9423		19.4687	19.3868		18.5091
Q91YT7	YTH domain-containing family protein 2	5	3	22.6905	22.7204	22.5782	22.5067	22.0152	22.3643			21.8323
P41216	Long-chain-fatty-acid--CoA ligase 1	34	31	28.7362	28.7033	28.9246	28.5083	28.5035	28.5472	28.0035	28.0465	27.8302
P31230	Aminoacyl tRNA synthase complex-interacting multifunctional protein 1	17	17	26.5226	26.3306	26.578	26.5305	25.8562	25.7268	25.6864	25.6551	25.6204
A0A494BAG1	Leucine-rich repeat protein SHOC-2 (Fragment)	2	2	19.9625	20.111	19.2848	19.1873	19.4317	19.4697	18.8506	18.7686	19.3239
P28659	CUGBP Elav-like family member 1	3	3	22.6589	22.6772	22.5493	22.2961	21.5927	22.5278	22.1621	20.938	22.0374
P62843	40S ribosomal protein S15	1	1	23.4874	23.458	23.3642	23.2104	22.8478	22.8747	22.5166	22.5299	22.7943
Q922J3	CAP-Gly domain-containing linker protein 1	2	2	21.0227	20.9631	20.7918	20.8726	20.7681	20.3671	19.7986	19.2624	20.8286
Q61584	Fragile X mental retardation syndrome-related protein 1	8	8	23.1655	23.2394	23.037	23.5138	23.3202	23.4447	22.3493	22.565	22.0404
P61965	WD repeat-containing protein 5	6	6	17.8354	19.7766	19.6307	19.8828	19.5807	19.8159	17.7782	17.0004	19.5138
G3X957	Liprin-beta-2	1	1	16.6383	17.3086	15.2263		15.2915	16.6756	16.3435	14.4603	16.0183
Q8CJ53	Cdc42-interacting protein 4	8	8	22.9574	22.3799	22.285	22.5543	21.8243	22.8985	21.4637	21.9056	21.869
O08582	GTP-binding protein 1	10	10	25.2953	25.0508	25.7047	24.6813	24.8952	25.062	24.5454	24.4356	24.7104
Q9DCB1	High mobility group nucleosome-binding domain-containing protein 3	1	1	18.063		17.7498	15.1712	15.1804	17.8348	17.4858		16.6048
Q9JHW4	Selenocysteine-specific elongation factor	23	23	26.4077	26.5219	26.4819	25.2454	25.5262	25.4021	25.6469	25.862	25.4792
P19253	60S ribosomal protein L13a	7	7	22.8417	24.4631	24.3635	24.5368	24.6713	24.499	22.9048	23.4661	23.3437
O35382	Exocyst complex component 4	9	9	22.7462	22.6124	22.9891	22.3389	22.4623	22.9259	21.9082	21.8884	22.1783
Q91WC0	Actin-histidine N-methyltransferase	7	7	21.1422	21.3559	21.4579	21.7675	20.078	22.2662	20.4362		20.6217
Q91V01	Lysophospholipid acyltransferase 5	1	1		19.3439	19.7281	20.6128	20.6542	19.9171		18.7562
P27808	Alpha-1,3-mannosyl-glycoprotein 2-beta-N-acetylglucosaminyltransferase	1	1	19.6242	19.6802	19.7849	18.5223		18.8592	18.4673		19.2416
D3YX99	Complex I-SGDH (Fragment)	1	1		22.2537		20.7568	20.4206		21.8029	21.0152
E9Q6D8	Complement component C6	6	6	21.5562	20.7782	21.3035	22.8653	22.6969	22.7438	19.9923	20.9802	20.2133
O35292	Ribonuclease 2B	1	1	19.325	19.027	19.2745	17.7221	17.7822	18.8019	17.8304	18.2982	18.9449
Q8C4Q6	Axin interactor, dorsalization-associated protein	4	4	20.0438	20.0344	20.3222	20.8017	20.5223	20.869	19.1395		19.5441
P50236	Bile salt sulfotransferase 2	13	4	24.1011	24.4706	24.0857	23.9114	23.7167	23.4544	23.5076	23.675	23.1097
A0A087WPT3	Twinfilin-2	1	1	22.4371	21.8204	22.1898	21.0587	21.1983	21.2782	20.9837	21.7521	21.3335
Q63918	Caveolae-associated protein 2	7	7	23.0373	22.765	22.6392	22.6063	22.4946	22.3704	22.2222	21.1476	22.4567
Q6P6M7	O-phosphoseryl-tRNA(Sec) selenium transferase	1	1	20.8908			20.5287		20.3306	20.0069	20.4911	19.7582
Q9QXX8	Nuclear fragile X mental retardation-interacting protein 1	1	1	22.1408	21.9713	22.0867	21.8759	21.6442	21.4917	21.2442	21.4831	21.1413
P19123	Troponin C, slow skeletal and cardiac muscles	2	2	20.2969	20.685	20.4603	19.1038			19.3963	19.9565	19.752
Q6P253	Dermokine	4	4	21.642	21.3568	21.6904	21.1638	21.0599	21.1219	20.8905	20.6744	20.8332
Q5SUH7	Clathrin interactor 1	7	7	21.9758	21.7725	21.4421		20.7396	20.1322	21.1438	20.9308	20.8467
P12246	Serum amyloid P-component	1	1	21.069	20.9522	21.2508	20.4897	20.6158	20.7127	20.7935	19.7612	20.2474
P03930	ATP synthase protein 8	1	1	21.1598	20.6175	20.6552	20.9897	20.7483	20.9753	19.9863	20.2149	19.9933
A0A0H2UKB8	Ubiquitin carboxyl-terminal hydrolase	1	1	15.7374	16.3686	15.858	16.6081	16.6471	16.7258	15.7461	14.4958
P19221	Prothrombin	35	35	31.2048	31.2606	31.2068	30.6482	30.636	30.6161	30.525	30.4276	30.4549
E9PX68	Solute carrier family 4 (anion exchanger), member 1, adaptor protein	1	1		15.7694		15.6212	16.0846		15.1257	14.9013
Q922D4	Serine/threonine-protein phosphatase 6 regulatory subunit 3	3	3	19.9291	19.7044	19.5777	20.0011	19.5111	19.753	19.4273	18.7664	18.6604
P58021	Transmembrane 9 superfamily member 2	5	5	20.1538	20.4989	20.2054	20.722	20.8446	21.0195	19.7708	19.0663	19.7039
D3YXP6	Phosphomevalonate kinase	2	2	20.478	20.0963	20.5216	19.6838	19.9519	19.8257	19.822	19.6772	19.3578
D3YUV1	Nuclear receptor-binding protein	1	1	20.9631	21.0144	20.7946	20.2678	20.1961	19.9193	20.1874	20.0909	20.27
P84096	Rho-related GTP-binding protein RhoG	5	4	23.487	23.4648	23.3742	23.1182	23.15	22.7124	22.4921	22.8556	22.7395
Q9CZR2	N-acetylated-alpha-linked acidic dipeptidase 2	4	4	21.0035	17.5722	17.1792	17.4996	17.4135	17.5576	17.1574	20.1036	17.5558
Q8BJ56	Patatin-like phospholipase domain-containing protein 2	8	8	23.3732	22.9236	23.2275	23.3352	23.2719	23.0863	22.4466	22.2307	22.6382
Q9WTX2	Interferon-inducible double-stranded RNA-dependent protein kinase activator A	3	3	17.9478	17.8175	17.2091	17.1813	17.2982	18.7283	17.2062	17.2008	16.2778
P52623	Uridine-cytidine kinase 1	4	4	19.7251		19.0442	19.6554	19.5834	18.9455	18.7432		18.6349
P26450	Phosphatidylinositol 3-kinase regulatory subunit alpha	9	9	23.1676	23.2454	22.2473	22.8058	22.4051	22.9173	22.0503	22.0838	22.4825
Q921K2	Poly [ADP-ribose] polymerase	9	2	20.0759	20.1753	20.1376	20.0004		19.8242	19.5429	19.3573	19.2983
P00329	Alcohol dehydrogenase 1	16	16	30.5848	30.4344	30.5451	29.9007	29.9289	29.9566	29.7851	29.8121	29.7919
P62301	40S ribosomal protein S13	6	6	25.075	24.996	24.8491	24.6452	24.4455	24.6066	24.3006	24.1997	24.2523
F8WIY7	StAR-related lipid transfer protein 13	1	1	19.756	20.1253							19.2282
A0A075B5L1	Immunoglobulin kappa variable 10-94 (Fragment)	2	2		20.0804	20.1185	20.2531	20.5792	20.0486			19.3757
O54724	Caveolae-associated protein 1	8	8	23.5649	23.6108	23.383	23.8473	23.9916	23.6657	22.4271	23.0531	22.8497
A0A498WFS2	UBX domain-containing protein 1	6	6	24.1789	25.3714	24.7904	24.4992	23.3122	24.5163	23.2402	24.454	24.4227
Q8VHM5	Heterogeneous nuclear ribonucleoprotein R	17	10	23.368	23.0023	23.2155	22.6763	22.8268	22.9097	22.5853	22.1798	22.6362
Q1HFZ0	RNA cytosine C(5)-methyltransferase NSUN2	13	13	25.1212	24.8338	25.0844	24.6692	24.0521	24.6806	24.336	23.9098	24.5711
Q8R5F7	Interferon-induced helicase C domain-containing protein 1	13	13	23.2489	23.2653	22.98	23.2411	23.2044	22.6545	22.5388	22.7221	21.992
D3YTQ3	Heterogeneous nuclear ribonucleoprotein D-like	6	4	24.8162	24.2025	24.4823	23.8915	23.8949	23.9875	23.8181	23.8204	23.7647
Q9QZ85	Interferon-inducible GTPase 1	11	8	25.4383	25.5615	25.8852	25.1707	25.1847	25.2173	25.025	24.9469	24.7821
E9Q3M0	Mothers against decapentaplegic homolog	2	2	19.8377	20.4835	20.1571	20.2188	19.6502			19.4649
Q9CQW9	Interferon-induced transmembrane protein 3	1	1	20.7081	20.6892	20.6543	20.3932	20.5966	20.7703	19.4707	20.4111	19.8603
Q922Q1	Mitochondrial amidoxime reducing component 2	8	8	24.2496	23.9388	24.0901	24.2139	24.0902	24.4318	23.5344	23.3608	23.2424
O08599	Syntaxin-binding protein 1	8	8	21.8826	21.4998	21.7343	21.852	22.0774	21.7487	21.3441	20.1838	21.2174
Q9QYB5	Gamma-adducin	9	9	23.1861	22.9567	22.6324	21.8746	22.9717	22.9202	21.9351	22.3561	22.3567
Q9Z222	N-acetyllactosaminide beta-1,3-N-acetylglucosaminyltransferase 2	1	1	18.2473	18.1799		18.3391	17.5116	17.8999	17.2472		17.7162
Q99K95	Replication termination factor 2	4	4	21.8008	22.1465	22.0099	20.0057		19.7885	20.8339	21.4219	21.4992
F2Z461	E3 ISG15--protein ligase Herc6	1	1	23.6407	23.7008	23.7709	22.2147	21.8267	21.8108	23.0192	22.8504	23.1101
Q9DCC5	Cbx3 protein	6	5	24.5734	24.7491	24.7241	24.2008	24.2929	24.3938	23.6419	24.0747	24.163
P97449	Aminopeptidase N	7	7	22.1295	23.905	23.8393	23.7403	23.7765	22.6253	22.5448	22.0627	23.4155
Q9QY06	Unconventional myosin-IXb	4	4	23.0495	23.0563	23.1724	21.4335	21.6385	20.9794	22.5837	22.3928	22.1702
Q61133	Glutathione S-transferase theta-2	7	6	26.8763	26.7721	26.7366	26.6753	26.5538	26.3909	26.2896	26.1256	25.832
Q9ESX5	H/ACA ribonucleoprotein complex subunit DKC1	6	6	21.6692	23.275	21.7726	21.3878	21.5259	20.8199	22.858	20.3101	20.6185
Q6VH22	Intraflagellar transport protein 172 homolog	1	1	20.4282	20.4108	20.5139	19.7134	19.6229	19.6736	19.7919	19.4223	19.9891
Q9R233	Tapasin	4	4	22.2287	22.7313	22.5104	22.7278	22.989	21.8466	21.5956	21.5403	22.2011
O70194	Eukaryotic translation initiation factor 3 subunit D	12	12	26.4772	27.4903	26.3666	28.059	28.1802	28.1196	26.3164	26.0014	26.2104
P70460	Vasodilator-stimulated phosphoprotein	9	9	22.113	22.4186	22.3764	21.8861	22.1599	22.2079	21.6398	21.775	21.4263
H3BLD7	Dynein, axonemal, heavy chain 11 (Fragment)	1	1		20.0577	20.2849	20.2639	20.688	20.707	19.2896	19.6627
Q8C845	EF-hand domain-containing protein D2	12	12	25.0947	25.0999	25.0704	24.7852	25.1808	25.1484	24.4419	24.3908	24.3763
Q8K1R7	Serine/threonine-protein kinase Nek9	1	1	18.4212	18.6556	17.4347	17.398	16.6877		17.6395		17.5089
O70274	Protein tyrosine phosphatase type IVA 2	2	2	22.2739	22.324	22.413	21.8347	21.7716	21.8391	21.7402	22.0446	20.985
A0A1L1STC6	Nesprin-1	3	3	25.4075	25.4162	25.3803	24.7015	24.6054	24.6993	24.8837	24.3831	24.8429
P12790	Cytochrome P450 2B9	14	8	24.8334	23.1296	22.9694	24.7888	24.3609	24.421	22.9089	22.9814	23.6692
P70663	SPARC-like protein 1	11	11	25.1519	25.1509	25.2976	25.0062	25.0664	25.1701	24.4672	24.2784	24.7737
P43883	Perilipin-2	4	4	21.1285	21.3069	21.4084	21.0005	20.8021	20.7201	20.9615	20.7517	19.9021
Q9JIB4	General transcription factor IIH subunit 2	1	1	14.2566	13.4444	14.0063		12.772	13.9671		12.7711	13.626
Q3UAW9	Transcription factor IIIB 50 kDa subunit	1	1	22.0539	21.5158	21.6321	21.6465	21.6836	21.7311	20.8423	21.3901	20.925
O09161	Calsequestrin-2	2	2	20.0795	19.9602	19.9534	18.0832			19.3552	19.3176	19.2991
P32067	Lupus La protein homolog	8	8	24.4731	24.6743	24.8882	24.079	23.942	24.0993	23.8877	24.138	24.0062
Q64339	Ubiquitin-like protein ISG15	3	3	25.8123	25.8861	25.9948	26.0479	25.7743	26.1822	25.2957	25.1636	25.2277
Q6YGZ1	Heparanase	5	5	21.8672	22.2159	22.2633				21.4885	21.1989	21.65
Q8VDP4	Cell cycle and apoptosis regulator protein 2	3	3	25.2305	25.2927	25.5794	24.9291	24.7008	24.3388	24.9073	24.1157	24.957
Q7TT50	Serine/threonine-protein kinase MRCK beta	11	10	21.7971	21.8675	21.6613	21.854	21.8786	21.6472	21.3503	20.787	21.1436
A0A0N4SWI4	Protein FAM136A	3	3	22.6908	22.6427	22.394	22.6375	22.5861	22.8225	22.1405	21.9284	21.6371
Q9DCM2	Glutathione S-transferase kappa 1	8	8	26.6857	26.6648	26.6616	26.729	26.6788	26.7022	26.0771	25.8269	26.1015
Q9CQV8	14-3-3 protein beta/alpha	3	1	19.3354	18.5664	19.8394	18.6025	19.8443	18.5731	18.551	17.5504	19.3778
A0A1Y7VJW9	Fibulin-5	1	1	21.0344		21.5924	20.066	19.9156	20.3913	20.6816
P84104	Serine/arginine-rich splicing factor 3	5	5	24.4178	24.3177	24.4458	23.4689	23.4764	23.6592	23.9423	23.5392	23.7022
G3UYU0	Mex3 RNA-binding family member A	1	1	20.9763		20.8852	20.9943			20.2743
O54879	High mobility group protein B3	3	3	21.3879	21.7246	21.5715	20.353	21.2121	20.3162	20.0912	20.9503	21.4051
Q9D0I8	mRNA turnover protein 4 homolog	4	4	23.2671	23.1748	23.0239	22.9247	22.945	23.16	22.6518	22.5558	22.2877
Q8BG81	Polymerase delta-interacting protein 3	1	1	21.4246	21.2118	21.513	21.1267	21.3092	21.0431	20.3866	20.8489	20.9191
Q99JX4	Eukaryotic translation initiation factor 3 subunit M	8	8	24.9486	24.5034	24.8752	24.3832	24.5462	24.436	24.1405	24.0928	24.1807
Q9CR26	Vacuolar protein sorting-associated protein VTA1 homolog	8	8	24.3472	24.1921	24.1371	24.0426	23.6134	23.946	23.7695	23.2885	23.6412
G3X961	Kelch domain-containing protein 4	3	3	20.6964	20.8149	20.4894	20.7743	20.8062	20.6999	20.3978	18.9846	20.3115
Q9ERG0	LIM domain and actin-binding protein 1	8	8	23.1528	23.0158	22.6219	23.2384	22.3084	22.9317	22.6986	22.5365	21.3141
Q9JHG7	Phosphatidylinositol 4,5-bisphosphate 3-kinase catalytic subunit gamma isoform	3	3	20.1992	19.5175	20.0447	19.525	19.5875	19.937	19.5269	18.8867	19.4176
Q9ER35	Fructosamine-3-kinase	8	8	25.7339	25.4623	25.7153	23.7399	24.0241	24.0468	23.915	25.1981	25.4625
P35802	Neuronal membrane glycoprotein M6-a	3	3	21.1056	20.9906	20.6532	20.3896	20.0789	19.959	20.5008	19.4413	20.6436
Q9CQ10	Charged multivesicular body protein 3	9	9	24.7629	24.4556	24.6655	24.0305	24.3321	24.3794	24.1396	23.891	23.9301
P14576	Signal recognition particle 54 kDa protein	10	10	25.0789	24.5946	24.8715	24.3664	24.4868	24.3949	24.4868	24.04	24.0959
Q9CZX8	40S ribosomal protein S19	4	4	25.6105	25.5846	25.6304	25.111	25.1996	25.2861	24.7999	24.9787	25.1107
G3UXA6	Polypyrimidine tract-binding protein 3	8	6	22.3778	22.8789	21.8018	22.2398	22.9788	22.4674	21.6397	21.4718	22.1454
Q07235	Glia-derived nexin	11	11	27.2647	27.1115	27.141	25.5156	25.4313	25.5151	26.4397	26.5692	26.5994
Q9JHH6	Carboxypeptidase B2	15	15	28.1757	28.1666	28.2801	27.6285	27.3476	27.5761	27.595	27.5968	27.5249
Q61686	Chromobox protein homolog 5	3	2	21.9184	21.6616	21.678	21.241	21.1737	21.646	21.3319	21.2532	20.7116
Q7TSC1	Protein PRRC2A	6	6	22.8295	22.889	22.8609	21.5716	21.0884	22.0691	22.2778	22.0446	22.3446
F8VQC1	Signal recognition particle subunit SRP72	16	16	23.9651	23.9835	24.0344	24.028	23.8783	24.1259	23.0337	23.656	23.332
Q80SY4	E3 ubiquitin-protein ligase MIB1	10	10	21.652	22.0186	21.3158	21.7228	21.3319	21.6711	21.3702	21.1008	20.6062
P47880	Insulin-like growth factor-binding protein 6	5	5	23.9094	23.6312	23.7754	21.6468	21.9521	22.2557	23.1799	23.1281	23.139
Q921F2	TAR DNA-binding protein 43	6	6	26.2861	26.3051	26.147	25.8749	25.8145	25.724	25.6412	25.5689	25.6553
Q7TNV0	Protein DEK	7	7	23.3405	23.1887	23.4053	22.3058	22.7878	22.8974	22.8694	22.3941	22.7616
Q8CGF7	Transcription elongation regulator 1	13	13	25.5033	25.1581	25.4065	24.8794	24.7202	24.989	24.8955	24.663	24.6505
Q61753	D-3-phosphoglycerate dehydrogenase	17	17	26.5143	26.4816	26.5299	26.5078	26.6082	26.5756	25.9812	25.8713	25.8045
Q9DBC3	Cap-specific mRNA (nucleoside-2'-O-)-methyltransferase 1	4	4	20.3753	21.5964	21.2127	21.8501	18.8471	20.8106	21.0274	18.4204	20.9688
Q8BFW7	Lipoma-preferred partner homolog	5	5	21.4998	21.9738	21.5847	22.2458	22.1776	22.6697	21.2874	20.8356	21.1164
P70441	Na(+)/H(+) exchange regulatory cofactor NHE-RF1	12	12	24.0642	24.4343	24.2456	23.5321	23.7381	23.7349	23.8241	23.617	23.4787
G3X9D6	Apolipoprotein N	3	3	21.5081	21.3005	21.6105	21.8654	21.6388	21.0181	21.2629	20.3399	20.8633
Q91XU3	Phosphatidylinositol 5-phosphate 4-kinase type-2 gamma	4	4	22.7449	22.8707	22.7563	22.3063	21.9555	22.4445	22.2768	21.8379	22.3813
Q9CWW6	Peptidyl-prolyl cis-trans isomerase NIMA-interacting 4	6	6	23.7799	23.9314	23.7018	23.2904	23.3224	23.6578	23.0357	23.3717	23.1728
Q9JKY5	Huntingtin-interacting protein 1-related protein	2	2	20.5325	20.5522	20.147	19.6713	20.3931	19.7827	19.9711	19.4497	19.9651
E0CYW1	Ubiquitin-like protein 5 (Fragment)	1	1	20.6197	20.7241	20.2826	20.696	19.9341	20.0387		19.9601	19.9369
P35980	60S ribosomal protein L18	4	4	23.5951	23.1761	23.2548	23.6365	23.7154	23.8126	22.9004	22.7446	22.5864
P70290	55 kDa erythrocyte membrane protein	14	14	26.6014	26.5959	26.6185	26.884	26.9314	26.8077	26.0081	25.9441	26.0493
P49182	Heparin cofactor 2	18	18	27.9518	27.9151	27.9096	27.9338	27.8931	27.9875	27.3698	27.2901	27.3035
P53986	Monocarboxylate transporter 1	4	4	24.4451	24.3423	24.4824	25.6143	25.6197	25.5747	23.6844	23.7242	24.0301
P28352	DNA-(apurinic or apyrimidinic site) endonuclease	10	10	25.8328	25.7875	25.889	25.1117	25.2156	25.6774	25.6801	24.8655	25.0214
P25918	B-lymphocyte antigen CD19	1	1	25.9044	26.2178	26.2005	24.736	24.4494	24.1841	25.442	25.4691	25.6187
Q61805	Lipopolysaccharide-binding protein	14	14	28.1431	27.8665	28.0054	27.1108	27.1004	27.0903	27.4123	27.2837	27.5171
Q8C8U0	Liprin-beta-1	1	1	18.784	18.5414	18.2962	18.5075	18.8182	18.443		17.9545
O35286	Pre-mRNA-splicing factor ATP-dependent RNA helicase DHX15	19	19	24.6434	24.7323	24.6696	24.5441	24.2269	24.3836	24.2644	23.8168	24.1307
A0A1L1STE4	Interleukin enhancer-binding factor 3	10	10	24.1338	23.7239	24.1769	24.0971	24.239	24.0938	23.4781	23.4467	23.3503
P61750	ADP-ribosylation factor 4	6	3	25.6669	25.6703	25.6608	25.3813	25.4282	25.4093	25.0034	25.0283	25.164
P19096	Fatty acid synthase	38	38	29.2884	29.3429	29.3359	27.4083	27.4109	27.4583	28.8017	28.6257	28.7441
A2AMW0	F-actin-capping protein subunit beta	10	10	25.6303	25.5856	25.5575	25.0186	25.0966	25.0278	25.0436	24.8726	25.0624
Q6ZWY9	Histone H2B type 1-C/E/G	3	3	24.6081	24.3028	24.6215	24.2115	24.1098	24.3517	24.038	23.9678	23.7473
P19324	Serpin H1	10	10	25.6304	25.2939	25.2564	25.2987	25.3084	25.2383	24.997	24.585	24.8143
Q8R3I3	Conserved oligomeric Golgi complex subunit 6	1	1	18.4998	18.2059	18.6797	18.5269	18.6437	19.0077	18.2009	17.7713	17.6003
Q8BMJ2	Leucine--tRNA ligase, cytoplasmic	40	40	27.0072	26.6735	26.6529	26.6892	26.6116	26.4314	26.2352	26.1809	26.1652
Q7TQK5	Coiled-coil domain-containing protein 93	1	1	22.1469	21.9691	22.2572	22.2706	21.7467	21.4307	21.3106	21.6047	21.6691
P49962	Signal recognition particle 9 kDa protein	8	8	24.618	24.6319	24.9214	23.8695	24.9036	24.9044	24.1461	23.9055	24.3367
P98078	Disabled homolog 2	6	6	23.241	23.3754	23.207	23.2085	22.8269	23.1182	22.9471	22.4622	22.6138
Q6P5F9	Exportin-1	25	25	29.0688	29.0568	29.1938	27.5357	27.4995	27.4584	28.5794	28.4103	28.5708
Q8C7G5	Apolipoprotein A-V	9	9	26.0363	25.9231	25.98	25.4558	25.3614	25.3887	25.5083	25.2419	25.4222
Q3UJD6	Ubiquitin carboxyl-terminal hydrolase 19	6	6	22.8399	22.9884	22.6702	22.7861	22.892	22.8101	22.3038	21.9584	22.4556
P49222	Protein 4.2	14	13	24.5751	24.1744	24.2907	24.3856	24.3737	24.6268	23.8977	23.6084	23.7956
Q8JZK9	Hydroxymethylglutaryl-CoA synthase, cytoplasmic	6	5	22.8391	22.213	22.2209	21.9392	22.3558	22.0093	21.9562	21.821	21.8313
P63028	Translationally-controlled tumor protein	3	3	22.2502	21.2452	22.0771	21.5823	21.8244	21.7573	21.4378	20.5922	21.7447
E9PVA8	eIF-2-alpha kinase activator GCN1	49	49	26.2507	26.1099	26.3164	26.204	26.294	26.2168	25.6105	25.6868	25.6349
A0A1L1SRV0	Calponin	3	3	23.5123	23.5313	23.5311	23.1576	23.2251	23.266	22.9951	22.5965	23.1815
Q6Q899	Antiviral innate immune response receptor RIG-I	30	30	26.7787	26.8417	26.9816	26.867	26.7732	26.8148	26.3275	26.2895	26.2534
Q9D832	DnaJ homolog subfamily B member 4	14	13	25.7089	25.8672	26.183	25.8278	25.7436	25.5639	25.4229	25.3151	25.3273
A0A6I8MWX0	Fibronectin type III domain-containing 1	1	1	15.9939	16.2482	15.5743	17.2022	17.551	17.4483	15.6597	14.653	15.6421
Q8CE64	Zinc finger protein 276	1	1		20.6098			20.2202		20.2978		19.7091
Q9D8U8	Sorting nexin-5	18	18	26.6765	26.573	26.6083	26.2857	26.2262	26.272	25.9698	26.1325	26.0245
Q9Z1R2	Large proline-rich protein BAG6	9	9	23.3008	22.519	22.8714	23.347	22.4132	22.9841	22.4382	21.7671	22.7099
Q8K0V4	CCR4-NOT transcription complex subunit 3	4	4	21.7558	21.6815	22.2152	21.8073	22.2168	22.1562	21.3826	21.7298	20.6872
A0A0A6YWB0	Muscleblind-like protein 1	7	7	24.508	24.2729	24.319	23.96	24.0679	23.9603	23.854	23.6671	23.8553
A0A140T8P5	Immunoglobulin kappa chain variable 8-24 (Fragment)	1	1	24.1123	23.701	24.2671	24.0308	24.0655	24.1625	23.6024	23.3682	23.434
Q8VDJ3	Vigilin	54	54	28.7904	28.8891	28.7007	28.5358	28.5471	28.504	28.1618	28.1798	28.3168
O55226	Chondroadherin	5	5	21.6646	21.2009	21.5231				20.9671	20.6337	21.0694
Q9Z2D6	Methyl-CpG-binding protein 2	4	4	21.5712	21.3879	21.71	21.1746	21.4087	21.287	21.094	20.4156	21.3127
P21126	Ubiquitin-like protein 4A	4	4	21.9133	22.0016	21.7177	21.7615	21.6951	22.0256	21.3295	21.6031	20.9119
Q6ZWM4	U6 snRNA-associated Sm-like protein LSm8	2	2	22.7385	22.6103	22.2134	22.1124	22.1384	22.4526	21.7168	21.9718	22.1683
A0A0G2JES3	60S ribosomal protein L9 (Fragment)	3	3	25.9647	25.6776	25.9103	25.7979	25.813	25.8026	25.4672	25.3944	24.9323
Q9QYJ3	DnaJ homolog subfamily B member 1	13	12	25.2482	24.6409	25.0974	25.2537	24.7444	24.9179	24.5828	24.3169	24.4279
Q99K48	Non-POU domain-containing octamer-binding protein	18	17	25.1503	25.5488	25.4559	25.1685	24.7506	24.8416	24.8625	24.848	24.7587
P61963	DDB1- and CUL4-associated factor 7	1	1		18.6825	18.4798	18.2182	18.5717	18.6609	18.2624	17.7194	18.0085
E9Q5M6	Cilia- and flagella-associated protein 44	1	1	22.5844	22.6334	22.8876		22.264	22.3837	22.1516	22.1088	22.1512
Q8CGE8	Interferon-activable protein 205-A	11	11	24.5585	24.4698	24.4616	24.8613	24.6562	24.6334	23.9622	23.7882	24.0234
Q91YR5	eEF1A lysine and N-terminal methyltransferase	5	5	18.1527	18.4731	18.0684	18.2838	18.0217	18.2031	18.2601	16.0352	17.9097
P70288	Histone deacetylase 2	3	3	19.5436	19.8543	19.4721	20.2423	19.8812	19.8319	18.7177	19.3324	19.0805
P43274	Histone H1.4	4	1	24.6012	25.4677	23.128	24.6586	25.0986	24.775	21.9463	24.9116	24.1881
Q9JL16	Interferon-stimulated gene 20 kDa protein	2	2	19.733	20.1833	20.1291		20.0826	20.0574	19.497	19.0097	19.7787
Q7TMY4	THO complex subunit 7 homolog	1	1	16.7395	17.3732	16.9066	16.4317	16.5573	16.673	17.3296	15.6835	15.728
P49429	4-hydroxyphenylpyruvate dioxygenase	12	12	25.8303	26.6663	26.9456	27.5828	27.3912	27.5055	25.94	25.9536	26.0668
P17897	Lysozyme C-1	7	4	25.343	25.3345	25.5046	24.7089	24.9451	24.9309	24.8834	24.5685	25.0099
Q8CGN5	Perilipin-1	9	9	24.1044	24.2598	24.0812	23.9452	23.9736	24.0681	23.2242	23.7782	23.703
Q7TMB8	Cytoplasmic FMR1-interacting protein 1	17	17	23.5073	23.242	23.5248	23.5012	23.6836	23.4657	22.9664	22.6596	22.9602
Q9QUI0	Transforming protein RhoA	12	4	28.2705	28.1472	28.1569	28.0362	28.1071	28.1549	27.6848	27.5337	27.6706
Q60668	Heterogeneous nuclear ribonucleoprotein D0	11	9	27.5998	27.5599	27.7287	27.615	27.7384	27.6763	27.1031	27.0268	27.0839
P46414	Cyclin-dependent kinase inhibitor 1B	1	1	19.0991	19.0523	18.8839	18.9005	18.6759	19.0165	18.4395	18.4706
Q8CFE2	Histone PARylation factor 1	1	1	19.7102	19.6645	19.4849	19.746	18.8392	19.5793	19.0637
B1AU74	Motile sperm domain-containing protein 2	1	1			18.4665		18.8025			17.9098
Q9CYH2	Peroxiredoxin-like 2A	3	3	25.4167	25.4515	24.7277	25.1517	25.3885	25.1986	24.3721	24.8088	24.8135
Q6PGB6	N-alpha-acetyltransferase 50	7	7	24.6011	24.6683	24.7337	24.311	24.3682	24.5343	24.1495	24.1108	24.0793
Q9CXY6	Interleukin enhancer-binding factor 2	5	5	22.2198	21.9771	21.7476	21.9604	22.0187	21.8803	21.5827	21.2818	21.4375
Q9CQR4	Acyl-coenzyme A thioesterase 13	3	3	25.8589	25.9605	25.912	25.4516	25.4445	25.5449	25.3926	25.249	25.4212
Q9ERD7	Tubulin beta-3 chain	12	1	22.8585	22.7832	22.7735	22.6309	22.7159	22.8852	21.2277	22.5851	22.5701
Q80V26	Golgi-resident adenosine 3',5'-bisphosphate 3'-phosphatase	2	2	19.4311	19.2519	18.8479	18.6918	18.9299	18.8561	18.781	18.33	18.7739
Q6A0A9	Constitutive coactivator of PPAR-gamma-like protein 1	18	18	25.0007	24.5347	24.3418	24.3344	24.0976	24.3553	23.9982	23.7812	24.4417
Q99PV0	Pre-mRNA-processing-splicing factor 8	14	14	23.9214	23.6414	23.9124	23.7653	24.8879	23.6208	23.5009	23.6503	22.3902
Q19LI2	Alpha-1B-glycoprotein	7	7	19.1829	21.6646	20.9819				20.1817	20.5523
Q91X58	AN1-type zinc finger protein 2B	4	4	22.4817	22.0238	22.3141	21.3707	21.4252	22.213	21.955	21.3672	21.822
P19973	Lymphocyte-specific protein 1	2	2	18.6647	18.6641	18.5348	18.4936	18.9134	19.0225			18.0734
Q9DCJ5	NADH dehydrogenase [ubiquinone] 1 alpha subcomplex subunit 8	3	3	20.6854		20.9422	20.8831	21.7063	21.411	20.0262	20.8271	19.7245
P83510	Traf2 and NCK-interacting protein kinase	5	5	23.9676	23.838	22.0352	21.3496	23.5075	23.5847	23.4329	20.7841	23.4268
Q99M51	Cytoplasmic protein NCK1	7	7	21.6321	22.7007	22.2207	21.3749	21.5512	21.6187	21.4077	21.2217	22.2595
P35285	Ras-related protein Rab-22A	4	3	21.5536	21.2825	21.597	21.076	21.0622	20.9613	20.7515	21.0477	21.0041
P61027	Ras-related protein Rab-10	8	5	25.3555	25.205	26.0431	25.031	24.6953	25.6648	25.1791	24.8777	25.0437
A0A140LIS5	Arginine and glutamate-rich protein 1 (Fragment)	1	1	20.8953	21.0115	21.0237	20.5772	20.5921	20.9472	20.6547	19.8595	20.6534
Q99L04	Dehydrogenase/reductase SDR family member 1	13	13	26.48	26.3297	26.3362	26.0267	25.9714	25.9943	26.0452	25.5014	25.9285
P63158	High mobility group protein B1	9	7	28.2539	28.4025	28.3298	27.974	28.1049	28.0528	27.8069	27.8055	27.7598
Q8BGD9	Eukaryotic translation initiation factor 4B	16	16	25.8328	25.8571	25.7758	25.5753	25.3963	25.7304	25.3004	25.0545	25.4657
Q3TPE9	Ankyrin repeat and MYND domain-containing protein 2	1	1	20.329	20.1254	20.1555		19.8882	20.538		19.6861	19.6487
G3UYR9	GRB10-interacting GYF protein 2 (Fragment)	2	2	17.4935	16.5127	16.6883				16.8223	15.369	16.7
Q6P1Y9	Exocyst complex component 1	1	1	19.7255	18.9466	19.3629	19.215	19.2886	19.1346	19.033		18.6268
P25911	Tyrosine-protein kinase Lyn	2	2	19.1574	19.5332	19.0775	19.0801		19.7558		18.7354
Q8BG05	Heterogeneous nuclear ribonucleoprotein A3	16	16	27.7305	27.6699	27.794	27.5232	27.6726	27.5755	27.1972	27.2674	27.1273
P59808	SAM and SH3 domain-containing protein 1	2	2	20.5486	20.4055	20.5569		14.8313	20.1673	20.243	19.5505	20.0386
Q8R550	SH3 domain-containing kinase-binding protein 1	1	1	21.3613	21.411	21.2525	21.3873	21.4291	21.3735	20.7527	20.2789	21.2402
Q8HWB2	Histocompatibility 2, Q region locus 4	12	7	26.6147	27.2022	27.3049	27.0826	27.185	27.1825	26.5507	26.5961	26.4668
Q80W37	Snurportin-1	1	1	16.4146	16.6423	16.2021	16.7493	16.5128	16.9291	16.4404	15.045	15.8909
P68404	Protein kinase C beta type	5	1	18.6985	18.9094	18.7162	19.1604	19.0303	19.3258	18.561	17.503	18.4625
Q6P8K8	Carboxypeptidase A4	1	1	17.4113	17.6491	17.2116	17.5669	17.4401	17.3015	17.626	16.0914	16.5591
P11928	2'-5'-oligoadenylate synthase 1A	6	6	21.6396	20.8346	21.0002	20.5529	20.71	21.1486	20.7345	20.0451	21.0664
O70305	Ataxin-2	3	3	19.3874	19.9943	17.9018	19.4765	19.8028	20.0909	18.3637		19.1393
G5E8G6	Unconventional myosin-Vb	1	1	22.4624	22.3776	22.229	22.3379	22.4506	22.3463	22.0878	21.4191	21.9166
Q9EP69	Phosphatidylinositol-3-phosphatase SAC1	12	12	23.8473	23.9245	23.5244	23.504	23.4985	23.224	23.315	23.2239	23.2122
P26150	3 beta-hydroxysteroid dehydrogenase/Delta 5-->4-isomerase type 3	5	5	22.7668	22.6491	22.7401	23.1522	22.6042	22.8822	22.3122	22.0896	22.1781
P48758	Carbonyl reductase [NADPH] 1	16	16	28.1775	28.1199	28.1603	27.9843	27.9748	28.1265	27.7488	27.5056	27.6264
Q91XL9	Oxysterol-binding protein-related protein 1	9	9	22.9696	23.1219	23.447	23.6125	23.4373	23.5892	22.8209	22.4471	22.7228
A0A1Y7VJX4	MutL homolog 3 (Fragment)	1	1	19.1881	20.2478	20.0988	19.3804	20.3523	19.8173	19.8019	18.8229
O35350	Calpain-1 catalytic subunit	24	24	26.3435	26.3435	26.2001	25.7636	26.0019	25.8154	25.7214	25.2643	26.1952
Q9CQE8	RNA transcription, translation and transport factor protein	6	6	23.6135	23.6188	24.143	23.834	23.6587	23.5436	23.2499	23.4529	23.1618
Q68FL4	Putative adenosylhomocysteinase 3	8	2	22.2497	21.9058	22.161	22.18	22.2238	22.236	21.7693	21.4716	21.5185
P30999	Catenin delta-1	7	7	23.8937	23.7575	23.9135	23.5916	23.7494	23.7971	23.6457	22.8887	23.3767
Q5GLZ0	Cytochrome P450 2C66	5	1	27.5141	27.5893	27.6128	24.9947	25.4781	25.338	26.9819	27.1224	27.0513
P62754	40S ribosomal protein S6	6	6	24.6677	24.3168	24.6135	24.6279	24.6214	24.2382	24.135	23.9617	23.9606
H9KV21	RBR-type E3 ubiquitin transferase	2	2	19.3187	18.9874	18.6966	18.3868	19.1306	18.6563	18.568	17.8287	18.9139
Q9WUM3	Coronin-1B	15	15	26.5398	26.6357	26.5781	26.2878	26.3056	26.429	26.2315	25.9561	25.995
P45591	Cofilin-2	6	5	25.4304	25.3329	25.5563	25.7269	25.7387	25.6403	24.5683	24.474	25.4966
P62082	40S ribosomal protein S7	7	7	26.2349	26.2064	26.1775	26.0999	26.3004	26.1561	25.8318	25.4983	25.7171
Q9Z1F9	SUMO-activating enzyme subunit 2	12	12	23.7753	24.1349	23.6758	23.4914	23.5212	23.6734	23.0371	23.1148	23.799
Q3TCH7	Cullin-4A	16	11	24.6124	24.3773	24.6256	23.8445	23.8842	23.917	23.9773	23.9057	24.1885
Q8BHC4	Dephospho-CoA kinase domain-containing protein	1	1	14.4884		16.3521	16.2727	15.6697	16.8742	15.1887
Q9EQI5	Chemokine subfamily B Cys-X-Cys	5	5	30.6518	30.7105	30.5184	28.8072	28.8664	28.818	30.0692	30.0393	30.231
Q9DBN5	Lon protease homolog 2, peroxisomal	1	1	17.9328	17.9441	17.589	17.3316	17.5355	17.5971			17.3178
Q8VHK9	ATP-dependent DNA/RNA helicase DHX36	4	4	23.8444	23.7868	23.5531	24.0882	24.0287	24.2141	22.9864	23.2994	23.3499
Q8BL66	Early endosome antigen 1	18	18	24.9668	25.1039	24.9697	24.5802	24.5901	24.3795	24.4791	24.5671	24.4598
P29533	Vascular cell adhesion protein 1	6	6	23.4209	23.3244	23.4174	23.7512	23.2528	23.7521	22.7499	23.2361	22.5568
P99029	Peroxiredoxin-5, mitochondrial	6	6	24.3833	24.1779	24.3755	24.2807	23.9076	23.8092	23.8277	23.8556	23.7278
Q8BU30	Isoleucine--tRNA ligase, cytoplasmic	47	47	27.2805	27.2159	27.2204	26.8763	26.8925	26.8035	26.725	26.687	26.774
Q8R1F1	Protein Niban 2	8	8	22.0499	22.1066	22.3186	22.4357	22.7456	22.6977	21.7304	21.5775	21.6518
Q80X41	Serine/threonine-protein kinase VRK1	2	2	19.9902	19.9613	20.2731	20.2184	20.5886	20.7589	19.64	19.506
E9Q3G5	ADP-ribosylation factor interacting protein 1	7	7	22.588	21.1253	22.7219	22.5153	22.4655	22.5153	21.9676	21.8096	21.5813
P08207	Protein S100-A10	1	1	23.7325	23.6096	23.8187	23.8029	23.6835	23.2915	23.2098	23.1696	23.2671
D3Z2Z6	Phospholipid-transporting ATPase IB (Fragment)	1	1	20.7125	20.6772	20.2312	20.1298	21.0261	20.4734	20.0514
P52792	Hexokinase-4	6	6	21.6451	21.3867	21.686	22.1676	22.0763	22.0977	21.4236	20.8984	20.8269
Q9WTI7	Unconventional myosin-Ic	15	15	24.5071	24.8933	24.4177	24.7617	24.6609	24.7909	24.2681	24.0588	24.0133
P35979	60S ribosomal protein L12	7	7	27.0614	27.1242	27.1747	26.9628	26.9183	26.8204	26.6516	26.634	26.5661
Q8BXC0	Prostacyclin synthase	1	1	19.2332	19.0436	18.8379	19.1996	19.7069	19.8909			18.5454
Q9QZD9	Eukaryotic translation initiation factor 3 subunit I	16	16	25.7681	25.7732	25.7598	25.1398	25.571	25.4164	25.2149	25.3332	25.2454
Q99LL5	Periodic tryptophan protein 1 homolog	2	2	19.12	18.5556	18.3336	18.4922	18.7459	18.5116	18.5163	17.7904	18.228
D3Z3P8	Estradiol 17 beta-dehydrogenase 5 (Fragment)	11	1	19.3251	19.4926	18.7723	18.9602	19.1459	19.5785	19.1142	18.1647	18.7514
P39447	Tight junction protein ZO-1	4	4	21.6297	22.1463	21.7807	22.3236	19.9147	21.8888	21.3883	21.3332	21.3853
Q9D394	Protein RUFY3	5	5	21.7441	21.8817	21.9323	21.6398	21.7395	21.2667	21.4116	21.0012	21.5926
E9Q2S9	Coiled-coil domain-containing protein 43	1	1	20.5626	20.685	20.3192	20.4819	20.3209	20.7192	20.3812	19.245	20.2279
Q8BML9	Glutamine--tRNA ligase	25	25	26.4306	26.1935	26.3159	25.9588	25.8669	26.037	25.7236	25.9766	25.7399
Q7TQD2	Tubulin polymerization-promoting protein	4	4	23.5936	23.4534	23.576	23.5493	23.0792	23.4939	23.2228	22.8318	23.0515
F7AEH4	40S ribosomal protein S12	8	8	26.7673	26.6536	26.7884	26.9228	26.9206	26.8704	26.3886	26.0321	26.2755
Q3B7Z2	Oxysterol-binding protein 1	9	9	22.1775	22.2143	22.4659	22.8444	22.0394	21.9321	21.9348	21.6648	21.7738
P15864	Histone H1.2	6	2	26.0663	26.1601	26.0958	26.0887	26.0384	26.15	25.6483	25.6795	25.5028
Q9D614	Syntaxin-17	1	1	19.6311	19.2122	19.4511	19.3446	18.5618	19.223	18.8834	18.4598	19.3573
P62827	GTP-binding nuclear protein Ran	19	19	29.401	29.3361	29.353	29.0437	29.1139	28.9586	28.8084	28.8466	28.9477
Q91WG4	Elongator complex protein 2	1	1	22.1142	22.3097	22.4188	21.6633	21.6632	21.8173	21.6778	21.7832	21.9078
A0A0G2JFH2	Microtubule-associated protein (Fragment)	11	2	20.6016	20.5418	20.0895	20.1728	20.1455	20.4588	19.8129	19.6962	20.2383
Q9ES74	Serine/threonine-protein kinase Nek7	7	7	23.0833	22.9905	23.2405	23.0694	23.2741	23.1274	22.5671	22.5635	22.7103
Q3U3J1	2-oxoisovalerate dehydrogenase subunit alpha	2	2	20.4326			19.7077	20.6208	21.477		19.94
Q8R5A3	Amyloid beta A4 precursor protein-binding family B member 1-interacting protein	8	7	23.1289	23.0593	23.1442	22.796	22.9175	22.9563	22.4118	22.5338	22.8736
Q9Z1M8	Protein Red	1	1	17.2326	16.5255	17.0279				16.9604	15.6117	16.523
P23927	Alpha-crystallin B chain	7	7	27.2586	27.414	27.3589	26.9312	26.9418	26.9456	27.0022	26.6462	26.8918
G3X8Y3	N-alpha-acetyltransferase 15, NatA auxiliary subunit	23	23	26.0662	25.8689	26.1572	25.468	25.9565	25.9411	25.592	25.4985	25.5429
Q9JKF1	Ras GTPase-activating-like protein IQGAP1	43	39	27.0106	26.8541	27.0507	26.896	26.8487	26.8279	26.5221	26.4606	26.4676
Q91VU7	Pseudouridylate synthase 7 homolog	6	6	25.7086	25.8873	25.6989	25.6573	25.67	25.8118	25.4099	25.1237	25.2912
P62071	Ras-related protein R-Ras2	4	3	22.2908	22.51	22.4449	22.451	22.2898	22.6878	21.9021	21.8703	22.0143
P08905	Lysozyme C-2	4	1	21.5488	21.5553	21.5873	21.1584	21.2166	21.1691	21.0226	21.3731	20.7719
Q9Z126	Platelet factor 4	4	4	30.0502	29.981	30.0072	28.6856	28.7871	28.7756	29.6639	29.4887	29.4206
Q8BYK6	YTH domain-containing family protein 3	6	4	22.515	21.8307	20.7622	22.2623	22.109	21.8175	21.0909	21.8483	21.076
O70400	PDZ and LIM domain protein 1	7	7	22.9172	22.6156	23.2349	22.5376	23.0697	22.6061	22.3606	22.5438	22.4715
Q60709	Amyloid-like protein 2	1	1	21.612	21.8401	21.8998	21.6072	21.8913	21.4798	21.5581	21.0115	21.2953
Q9CXW3	Calcyclin-binding protein	12	12	26.3586	26.2023	26.4119	25.9095	26.1027	25.9823	25.8583	25.8704	25.801
P42669	Transcriptional activator protein Pur-alpha	8	7	24.1192	24.1545	24.0259	23.262	23.8052	22.9742	23.7156	23.4209	23.6979
Q3TJZ6	Protein FAM98A	4	3	22.0129	21.8752	21.9187	22.4846	22.4496	22.4927	21.7029	20.4359	21.8524
Q9JIW9	Ras-related protein Ral-B	4	4	22.6151	21.9721	22.2743	22.5521	21.7856	21.9909	21.7212	22.2837	21.3186
O35385	Serine/threonine-protein phosphatase with EF-hands 2	1	1	20.7094	21.5398	21.2726	20.7082	20.6307	20.514	19.9001	21.2563
Q8VCI5	Peroxisomal biogenesis factor 19	1	1	18.0346	17.805	18.099	18.3248	18.5339	18.7194	17.9267	16.8379	17.5436
Q9JMA7	Cytochrome P450 3A41	16	9	24.6426	24.5043	24.4553	24.4055	24.4639	24.4689	24.1322	23.877	24.1405
Q8BU31	Ras-related protein Rap-2c	1	1	19.1153	18.8977	18.7189	18.9804	18.9143	18.5525	18.7498	18.1767	18.3261
D3YTT4	Isobutyryl-CoA dehydrogenase, mitochondrial	1	1		20.722		20.8943	20.9475	21.0848	20.2409
Q9EPL8	Importin-7	18	18	24.012	23.7232	23.7825	23.5831	24.038	23.357	23.4202	23.371	23.2991
Q62087	Serum paraoxonase/lactonase 3	3	3	19.7339	19.1093	19.7341	21.5102	20.4873	20.6288	19.4827	18.4001	19.1391
D3Z7B5	Protein CIP2A	1	1	20.2159	20.6338	20.2544	20.6298	20.3828	19.9859	19.8705	20.0517	19.769
P56212	cAMP-regulated phosphoprotein 19	6	5	22.2062	21.7649	21.84	21.4651	21.9244	21.3094	21.4311	21.1495	21.7683
Q9DD18	D-aminoacyl-tRNA deacylase 1	5	5	22.258	22.0457	22.091	21.8777	21.8789	21.517	21.78	20.2154	22.2818
Q9CQX2	Cytochrome b5 type B	1	1	22.3023	22.5579	22.2368	23.419	23.2675	23.034	21.9792	21.8764	21.8244
Q7TQH0	Ataxin-2-like protein	7	7	25.844	25.8819	25.6503	25.3836	25.511	25.4267	25.3363	25.1222	25.477
Q924Z4	Ceramide synthase 2	4	4	20.6439	20.6213	20.0983	19.6811	19.8631	20.662	20.3235	19.4804	20.0723
P29351	Tyrosine-protein phosphatase non-receptor type 6	20	20	25.7524	25.7296	25.7499	25.6469	25.5777	25.6624	25.2293	25.2059	25.3668
D3Z5I1	Zinc finger CCCH-type antiviral protein 1	6	6	21.1912	21.307	20.6373		21.8948	21.6697	21.5934	19.7656	19.4327
Q9DBZ5	Eukaryotic translation initiation factor 3 subunit K	6	6	26.7005	26.5131	26.7064	26.563	26.4682	26.3805	26.2685	26.1583	26.0704
Q5HZI1	Microtubule-associated tumor suppressor 1 homolog	6	6	24.3153	24.2875	24.3454	23.4677	23.5951	23.5721	23.8858	23.875	23.7622
Q9JII5	DAZ-associated protein 1	4	4	23.2388	23.0566	23.4049	22.895	23.0274	22.832	22.2708	22.7966	23.1113
Q91X72	Hemopexin	19	19	27.4256	27.323	27.3279	27.7252	27.6993	27.6052	26.8852	27.0417	26.7117
F6QB26	Growth arrest-specific protein 7	1	1			14.584					13.0901	14.7028
Q3UED7	Interferon-gamma-inducible GTPase Ifgga2 protein	4	1	18.075	16.7468	18.0841	16.6014	16.28	16.311	17.5239	16.9041	17.3559
Q9DBG7	Signal recognition particle receptor subunit alpha	16	16	28.1638	27.8195	28.5381	27.8608	28.2592	28.5579	27.5871	27.8931	27.7012
A0A3B2WDD2	Ribosomal protein	8	8	24.7567	24.6253	24.6504	24.8197	24.4779	24.5639	24.1258	23.9819	24.4713
P52479	Ubiquitin carboxyl-terminal hydrolase 10	8	8	22.393	21.9629	22.0847	22.4203	22.4317	22.5774	22.0546	21.0139	21.8038
A0A1B0GSX6	PDZ and LIM domain protein 3	3	3	20.7209	20.366	20.4597	19.8311	20.4527	20.2248	20.3088	19.6294	20.1386
Q62448	Eukaryotic translation initiation factor 4 gamma 2	14	14	24.2248	24.2527	24.337	24.1194	24.1359	24.0663	23.8695	23.6448	23.8808
Q3UHX2	28 kDa heat- and acid-stable phosphoprotein	6	6	23.9149	23.8696	24.0531	23.6192	23.5935	23.4395	23.2724	23.3423	23.7694
P62270	40S ribosomal protein S18	12	12	26.4328	26.4593	26.3427	26.0196	26.1143	26.2719	26.0007	25.7823	26.0335
P46412	Glutathione peroxidase 3	8	8	27.4418	27.3783	27.5503	27.7654	27.6022	27.4765	26.888	27.0254	27.0499
P59383	Leucine-rich repeat neuronal protein 4	6	6	23.5179	23.424	23.406	23.4414	23.6511	23.2818	22.8306	22.9616	23.1355
P11103	Poly [ADP-ribose] polymerase 1	10	3	22.1466	21.9212	22.0649	21.3129	22.0775	21.7544	21.5655	21.0824	21.959
Q9JKV1	Proteasomal ubiquitin receptor ADRM1	1	1	19.5341	19.5049	19.5484	19.6288			19.0621
P16045	Galectin-1	2	2	20.4509	20.1681	20.3773	20.4838	20.6586	20.4661	19.559	20.0015	20.0056
P04247	Myoglobin	2	2	22.843	23.1172	22.7521	22.997	22.6117	22.8934	22.5586	22.3268	22.4464
Q9R0X2	ADAM DEC1	2	2	22.7274	22.1926	22.3313	23.1033	22.1537	21.988	21.779	22.357	21.6766
Q8K442	ABC-type organic anion transporter ABCA8A	4	4	20.9529	20.6833	20.7339	20.4482	20.6088	20.5692	20.3811	20.3313	20.2759
Q68FG2	Spectrin beta chain	1	1	23.3833	23.0339	23.3685	23.2014	23.0576	22.8871	22.8605	22.8529	22.6989
P47962	60S ribosomal protein L5	13	13	28.0689	28.0439	27.9925	28.1768	28.1609	28.2279	27.6076	27.5456	27.5666
Q9D024	PAT complex subunit CCDC47	5	5	23.0304	23.081	22.9507	23.1916	23.4293	23.4627	22.1258	22.3814	23.0219
P0C8K7	Small integral membrane protein 1	1	1	22.2584	22.1669	22.1919	22.4724	23.3038	22.6467	21.6277	22.2223	21.2052
P62821	Ras-related protein Rab-1A	8	2	23.3703	23.4794	23.6149	23.1404	23.5933	23.4608	22.7963	23.1933	23.0771
Q9CZJ2	Heat shock 70 kDa protein 12B	2	1	14.8102	14.9303	14.4549	15.5866	14.8001	14.9194	14.8732	13.3479	14.2507
Q9D154	Leukocyte elastase inhibitor A	3	3		18.9997		18.4897	18.7228		18.3214	18.9075	18.3116
P49312	Heterogeneous nuclear ribonucleoprotein A1	9	9	25.5195	25.3334	25.3865	25.3223	25.4136	25.2521	25.0186	25.0291	24.8155
P15535	Beta-1,4-galactosyltransferase 1	1	1	19.2852	19.4562	19.5482	19.0935	18.987	19.3097	19.3508	18.1047	19.1885
Q5DTM8	E3 ubiquitin-protein ligase BRE1A	2	2	22.6964	22.3444	22.2196	22.459	22.3459	22.5512	22.144	21.7221	22.0353
Q9EQ06	Estradiol 17-beta-dehydrogenase 11	8	6	24.3377	24.6261	24.4244	24.9812	24.8679	25.0765	24.0224	23.7035	24.2591
Q9DB27	Malignant T-cell-amplified sequence 1	8	8	25.7339	25.691	25.8287	25.763	25.69	25.658	25.2084	25.3415	25.3397
Q3UY34	Protein CUSTOS	2	2	15.1113	15.1187	20.9847	20.9733	13.9021	20.9231		12.6661	19.9852
P28654	Decorin	3	3	20.0135	19.8957	19.6071	19.6856	19.6475	19.424	19.8662	19.1564	19.0105
Q9D819	Inorganic pyrophosphatase	14	14	28.5114	28.4019	28.4829	28.2561	28.2619	28.2509	27.8767	27.9436	28.1993
G3UYJ2	Allograft inflammatory factor 1 (Fragment)	2	2	21.5473	20.3041	21.2318	20.128	20.4686	21.3452	21.0515	20.579	20.2501
Q8CG19	Latent-transforming growth factor beta-binding protein 1	25	25	25.2081	25.2961	25.2857	23.7559	23.8957	23.9503	24.8347	24.7361	24.8631
Q8BLX7	Collagen alpha-1(XVI) chain	2	2	20.3237	20.6079	21.0162	19.704	20.6606	21.2354	19.7738	19.2394	21.0459
Q6DFX2	Anthrax toxin receptor 2	11	10	25.9183	25.9366	25.798	24.9227	25.0818	24.8888	25.4721	25.3139	25.5103
Q64331	Unconventional myosin-VI	4	4	21.9284	22.0063	22.3537	20.9174	20.749	20.806	21.667	21.5041	21.7871
A0A0U1RNG8	E3 ubiquitin-protein ligase KCMF1	2	2	21.2164	19.5761	19.8672	21.0666	20.9678	21.0506	20.5473	19.2726	19.7624
Q8BQ46	TAF15 RNA polymerase II, TATA box binding protein (TBP)-associated factor	3	1		22.5232							22.0747
Q8CG14	Complement C1s-A subcomponent	11	11	25.274	25.3092	25.2588	25.0469	25.2072	25.261	24.9755	24.5441	24.9398
Q8CD76	Kinesin light chain	15	13	25.1005	24.8522	24.9998	24.6055	24.3167	24.4191	24.2747	24.824	24.4654
P22599	Alpha-1-antitrypsin 1-2	9	5	26.1441	25.9871	26.2321	25.89	25.611	25.9317	26.1459	25.4011	25.3386
Q9DB16	Calcium-binding protein 39-like	8	4	21.747	21.8482	22.0564	21.0659	20.7673	20.8968	21.9578	21.093	21.0968
Q8C1B7	Septin-11	20	11	26.6627	26.5184	26.5941	26.1426	26.1409	26.215	26.2619	26.1084	26.0634
Q9WUM4	Coronin-1C	14	12	26.341	26.2064	26.1571	25.8888	26.0152	26.1943	25.9386	25.5493	25.8573
Q9CUN6	E3 ubiquitin-protein ligase SMURF1	1	1	20.2845	20.1313	20.2668	20.549	20.1633	20.3479		19.7839
Q9QXD6	Fructose-1,6-bisphosphatase 1	3	3	20.9525	21.1205	21.0134	21.2078	21.2834	21.4763	20.7992	20.6804	20.2172
Q7TT18	Activating transcription factor 7-interacting protein 1	1	1	20.0134	20.2037	20.3562	19.2955	19.4369	20.0419	19.8725	19.8633	19.4953
Q9R1P0	Proteasome subunit alpha type-4	5	5	21.6207	21.5833	21.6913	21.4337	21.5434	21.4463	21.4607	20.8382	21.2012
P39053	Dynamin-1	14	5	18.725	18.0819	18.6201	18.2559	17.5784	18.7754	18.4568	17.2267	18.2232
Q9WVK4	EH domain-containing protein 1	28	19	28.4423	28.5086	28.5436	28.3164	28.2494	28.2682	28.0329	28.1278	28.0058
P31938	Dual specificity mitogen-activated protein kinase kinase 1	4	3	20.7899	21.3122	20.7141	20.9172	20.6734	20.756	20.3451	20.3606	20.8147
Q62167	ATP-dependent RNA helicase DDX3X	25	24	26.7358	27.0706	26.7591	26.5676	26.5475	26.5265	26.4555	26.3188	26.4933
Q9D711	Pirin	4	4	22.6804	22.7223	22.6349	23.0429	23.0593	22.6667	22.5209	22.1251	22.0297
Q9D883	Splicing factor U2AF 35 kDa subunit	4	4			19.2594	19.67	20.4034	20.0151	18.9247		18.7095
Q08857	Platelet glycoprotein 4	6	6	25.7305	25.8082	25.8242	25.231	25.1399	25.2337	25.2674	25.5027	25.2671
A0A3B2W812	CD2-associated protein	13	13	25.1773	24.7308	24.9924	25.4769	25.4082	25.5138	24.4243	24.5102	24.6757
P61028	Ras-related protein Rab-8B	9	3	27.2929	27.0791	27.22	26.9909	26.7695	26.8836	26.939	26.6903	26.6393
P61600	N-alpha-acetyltransferase 20	3	3	21.7509	21.4332	21.2661	21.1496	21.5222	21.6988	20.7451	20.9667	21.3923
F6WR04	Cathepsin S	1	1		20.6157			20.8258	20.8034		20.2277	20.127
Q99LF4	RNA-splicing ligase RtcB homolog	20	20	27.1579	26.9998	27.0417	26.8115	26.912	26.9671	26.6965	26.6087	26.5865
Q9ET54	Palladin	10	9	22.5134	22.5572	22.7188	22.4156	23.1662	23.1986	22.022	22.371	22.0721
P08226	Apolipoprotein E	44	44	34.1095	34.1905	34.1164	33.4015	33.4441	33.3951	33.6912	33.6953	33.7241
Q8QZR5	Alanine aminotransferase 1	5	5	21.6448	21.7102	21.2418	21.8779	21.958	22.0582	21.3766	20.7629	21.1286
Q8K023	Aldo-keto reductase family 1 member C18	6	1	21.7243	22.0499	22.0487	21.0778	22.0667	21.2976	21.5318	21.6679	21.3193
A0A494B9A6	Mesothelin	3	3	19.8203	19.8017	19.2336	18.8349	19.2543	19.0731	18.5744	19.5919	19.282
Q3UIR3	E3 ubiquitin-protein ligase DTX3L	18	18	25.7517	25.6395	25.5072	25.6694	25.7193	25.8325	25.402	24.689	25.4053
Q7TN29	Stromal membrane-associated protein 2	3	2	19.9562					19.5847	19.0846	19.8581
A0A075B5U0	Immunoglobulin heavy variable V1-12	1	1	21.8915	21.3529	21.9612	22.0989	21.5895	21.6679	20.9847	21.7722	21.0951
Q9DBB9	Carboxypeptidase N subunit 2	10	10	24.4816	24.2549	24.4042	24.4427	23.8272	24.2666	24.1313	23.84	23.867
Q9D7S9	Charged multivesicular body protein 5	3	3	23.6329	23.8077	23.6462	23.5794	23.476	23.3097	23.2097	23.1802	23.4003
G3X9K3	Brefeldin A-inhibited guanine nucleotide-exchange protein 1	6	3	20.5735	20.1127	20.3832	19.8123	20.3681	20.636	19.9481	19.9635	19.9008
Q9CQX6	N(alpha)-acetyltransferase 12, NatA catalytic subunit	4	1	21.7418	21.7948	21.6693	21.561	21.7832	21.6936	21.3183	21.1365	21.4448
Q8K1J6	CCA tRNA nucleotidyltransferase 1, mitochondrial	11	11	23.1731	22.2782	23.0706	22.4439	22.3898	23.2725	22.6256	22.1988	22.5278
Q91WS0	CDGSH iron-sulfur domain-containing protein 1	3	3	22.4074	21.2177	21.8108	23.1961	23.1527	23.1369	21.7479	21.003	21.5412
Q8K3K8	Optineurin	1	1	19.0024	19.1895	18.3953	16.8848	17.6208	16.8347	19.1591	17.351	18.3666
Q61166	Microtubule-associated protein RP/EB family member 1	14	12	28.3058	28.4425	28.4562	27.685	27.7905	27.8173	28.0574	27.8874	27.9744
P35279	Ras-related protein Rab-6A	6	5	24.6667	25.173	25.1152	25.1345	25.2115	25.1258	23.8137	24.7878	24.8962
Q78IK2	ATP synthase membrane subunit K, mitochondrial	1	1	21.2138	20.9679	21.099	21.7545	21.8908	21.6957	20.6863	20.733	20.5856
E9Q9R9	Disks large homolog 5	1	1	21.8902	22.1705	22.0103	21.8583	22.07	21.7897	21.752	21.1893	21.787
Q9D1P4	Cysteine and histidine-rich domain-containing protein 1	17	17	26.1834	26.0466	25.9442	26.0476	25.951	25.9857	25.7639	25.4294	25.6888
Q99L20	Glutathione S-transferase theta-3	8	7	25.5681	25.085	25.4217	25.2625	25.8098	25.3045	25.0368	24.8975	24.9
P62806	Histone H4	2	2	21.2334	20.6336	20.9739	20.7944	20.2721	21.0165	20.6606	20.8207	20.0295
B1AUY3	Rho GTPase-activating protein 4	1	1	18.0374	18.0501	17.5214	18.1191	17.8002	18.073	17.3512		17.57
Q9CQI7	U2 small nuclear ribonucleoprotein B''	3	1	20.7793	20.5513	20.6434	20.7783	20.7234	20.8522	20.3397	19.9395	20.3896
Q80YR5	Scaffold attachment factor B2	2	1	16.8292	16.9581	16.5965	16.5763	16.4308	16.5047	16.9951	15.7141	16.1179
Q99J36	THUMP domain-containing protein 1	11	11	24.5092	24.57	24.5034	24.291	24.3185	23.8872	24.1903	23.8633	24.2304
P55302	Alpha-2-macroglobulin receptor-associated protein	9	9	23.3237	23.3301	22.984	23.2814	23.4903	23.5818	23.0331	22.3792	22.902
P43276	Histone H1.5	2	2	21.5812	21.6549	21.8754	21.8286	21.7388	21.7194	20.8913	21.6013	21.2856
Q6PD03	Serine/threonine-protein phosphatase 2A 56 kDa regulatory subunit alpha isoform	12	11	23.5535	23.7785	23.8287	24.1481	23.6551	23.6876	23.5396	23.446	22.8314
Q9R0P5	Destrin	8	8	29.063	29.1027	28.9456	28.8465	28.7935	28.9269	28.7286	28.4229	28.6854
P26231	Catenin alpha-1	13	12	24.0314	23.7534	23.9682	24.0765	23.8492	24.0604	23.2845	23.3334	23.826
P52503	NADH dehydrogenase [ubiquinone] iron-sulfur protein 6, mitochondrial	3	3	22.7581	22.4783	22.2816	21.3927	21.6778	21.4913	22.2072	21.8861	22.1844
Q810A7	ATP-dependent RNA helicase DDX42	8	8	22.8778	23.0531	23.1072	22.7389	22.6664	22.6947	22.8656	22.2353	22.6201
Q9Z1G3	V-type proton ATPase subunit C 1	7	7	23.7475	23.3186	23.5486	23.3215	23.1756	23.4606	23.2222	23.0662	23.0956
Q922B2	Aspartate--tRNA ligase, cytoplasmic	37	37	28.3529	28.2538	28.2401	27.601	27.6737	27.6177	28.0273	27.9428	27.5849
Q9D1J3	SAP domain-containing ribonucleoprotein	4	4	21.1239	21.5596	21.4856				20.7794	21.251	20.8741
Q9ERF3	WD repeat-containing protein 61	4	4	23.1881	23.0169	23.3203	22.5618	22.5953	22.3684	22.8824	22.3309	22.9907
Q91Y47	Coagulation factor XI	18	18	27.5288	27.3943	27.5091	26.2136	26.2284	26.5122	27.1522	26.9346	27.0864
P42227	Signal transducer and activator of transcription 3	17	17	24.349	24.4109	24.2881	24.0416	23.7898	23.9319	23.8345	24.1372	23.8016
Q64012	RNA-binding protein Raly	3	3	22.5172	23.0779	22.2333	22.8815	23.1037	22.4273	22.0516	22.4782	22.1426
P62259	14-3-3 protein epsilon	4	3	22.8796	22.9654	22.883	21.7233	21.8341	21.921	21.3904	22.7944	22.8733
P28862	Stromelysin-1	6	6	21.5396	21.4671	21.3618	21.1638	20.2445	20.7277	21.3029	21.2808	20.3533
Q61211	Eukaryotic translation initiation factor 2D	4	4	21.9272	22.2231	21.8009	21.901	21.9579	21.758	21.9381	21.2359	21.4703
Q9CPR1	RWD domain-containing protein 4	2	2	19.4449	19.3359	19.5836	19.8283	19.5221		19.0011	19.1249	18.999
E9PV41	Protein diaphanous homolog 1	27	27	26.2011	26.3928	26.4726	25.8674	26.0264	26.8812	26.0875	25.7054	26.0134
D3YVJ7	Aldo-keto reductase family 1, member B3 (aldose reductase) (Fragment)	1	1	18.1852	18.4938	19.5669	18.5809	18.4344		18.6464	18.0918	18.5854
O08663	Methionine aminopeptidase 2	14	14	26.2403	26.0667	26.1471	26.0469	26.2439	26.2254	25.7576	25.7359	25.7225
P32921	Tryptophan--tRNA ligase, cytoplasmic	17	17	28.1318	28.1624	28.0353	28.0117	28.146	28.0332	27.7006	27.7268	27.6617
Q8BX80	Cytosolic endo-beta-N-acetylglucosaminidase	5	5	25.9342	25.9671	25.649	24.9541	25.1899	25.2066	25.2612	25.3917	25.649
P00920	Carbonic anhydrase 2	6	6	24.9602	24.9998	24.7596	24.8266	24.8889	24.9373	24.5654	24.285	24.6173
E9Q1G8	Septin	17	16	26.3722	26.0719	26.1558	26.0413	26.1937	26.0728	25.6443	25.6929	26.0149
Q9R078	5'-AMP-activated protein kinase subunit beta-1	6	6	25.1372	24.7473	25.1903	24.9332	25.3144	24.9429	24.6613	24.7285	24.4782
P04202	Transforming growth factor beta-1 proprotein	9	9	24.2445	24.2212	24.356	22.3551	22.932	22.2694	23.9123	23.7479	23.9257
Q9CRB3	5-hydroxyisourate hydrolase	6	6	22.6251	22.2528	22.3495	22.3328	22.4192	22.5201	22.0508	21.744	22.1913
Q80U63	Mitofusin-2	1	1	16.7777	16.9105	16.5434	17.2863	17.3043	17.3043	16.4805		16.19
Q9WTM5	RuvB-like 2	4	4	20.566	21.0453			20.9182	19.8684	20.8395	19.2756	20.6866
P42225	Signal transducer and activator of transcription 1	17	17	26.3122	26.4155	26.383	26.0391	26.0005	25.9674	25.9213	25.966	25.998
F7CFT1	AN1-type zinc finger protein 1 (Fragment)	2	2	20.5435	20.4981	20.189	19.7349	20.1436	19.6909	20.1932		19.8006
Q8K3H0	DCC-interacting protein 13-alpha	1	1		16.6423	15.9758	16.9636	16.6399	16.511			15.9391
Q7TMY8	E3 ubiquitin-protein ligase HUWE1	13	13	22.9147	22.6537	22.8062	22.7821	22.7786	22.8194	22.6955	22.1925	22.2174
Q9R099	Transducin beta-like protein 2	10	10	24.4038	25.0039	24.9151	23.5679	23.4168	23.2634	24.2277	24.5047	24.4229
A0A140LHQ8	Phosphatidylinositol-binding clathrin assembly protein (Fragment)	4	1	22.028	22.3365	22.2345	22.4278	22.3901	22.5259	21.765	21.8544	21.7741
Q6PGC1	ATP-dependent RNA helicase DHX29	12	12	22.5701	22.6566	22.4812	22.0776	22.8155	22.9044	22.1769	22.0496	22.2595
Q8VCH0	3-ketoacyl-CoA thiolase B, peroxisomal	12	6	26.0943	25.7607	25.7753	26.4867	26.5919	26.4328	25.4064	25.5606	25.4655
Q9JKC8	AP-3 complex subunit mu-1	7	7	23.2443	23.0675	23.2235	23.5266	23.4878	23.6273	22.9233	22.7666	22.6167
P39054	Dynamin-2	27	4	26.9616	26.9603	27.2065	27.0166	27.041	26.8286	26.6557	26.6635	26.6039
Q99LM2	CDK5 regulatory subunit-associated protein 3	12	12	24.5248	24.3478	24.5298	24.6492	24.5918	24.7952	23.6256	24.1911	24.2919
O88487	Cytoplasmic dynein 1 intermediate chain 2	8	8	24.8405	24.811	25.517	24.5812	24.7603	25.3222	24.5398	24.5701	24.9265
P09813	Apolipoprotein A-II	2	2	23.6189	23.9719	24.0783	23.4427	23.3688	23.252	23.1884	23.6567	23.6113
P14106	Complement C1q subcomponent subunit B	9	9	30.0879	30.1293	30.066	29.6289	29.6667	29.8176	29.6889	29.6903	29.6976
P14131	40S ribosomal protein S16	9	9	27.0067	27.0025	27.0599	26.136	26.0933	26.0483	26.6233	26.5956	26.6451
Q9JMG7	Hepatoma-derived growth factor-related protein 3	3	2	20.3261	20.0912	20.0791	20.4939	20.3318	20.6093	20.2083	19.0754	19.8054
Q6PDL0	Cytoplasmic dynein 1 light intermediate chain 2	7	7	24.5897	24.2414	24.4725	24.4839	24.5897	24.4564	24.159	24.0434	23.9087
Q9EQE2	Protein-serine/threonine phosphatase	1	1	21.7332	21.5028	21.8757	22.0855	21.8705	21.7921	21.2778	21.4893	21.1516
Q9CQH7	Transcription factor BTF3 homolog 4	5	5	26.1457	26.302	26.3298	25.3228	25.8176	25.7581	25.844	25.7824	25.9571
Q8BX70	Vacuolar protein sorting-associated protein 13C	53	53	26.2672	26.1474	26.1993	26.1472	26.1604	26.1651	25.899	25.7518	25.7662
Q9D6Z1	Nucleolar protein 56	12	12	25.1277	24.9712	25.0784	24.7982	24.7301	24.6846	24.919	24.4307	24.5938
Q61792	LIM and SH3 domain protein 1	9	9	26.2314	26.1582	26.1024	26.0897	26.1804	26.267	25.854	25.6579	25.7821
Q61635	GTP-binding protein	21	21	26.9626	26.6791	26.7945	26.5903	26.5276	26.4447	26.4777	26.4987	26.2755
E9Q8I7	Nuclear transcription factor, X-box-binding-like 1	1	1	14.6851	15.1079	14.5071	15.5173	14.7871	14.77	14.1845	13.5711	15.0442
Q80UM7	Mannosyl-oligosaccharide glucosidase	3	3	19.1911	19.0472	19.1311	20.2998	20.6349	20.6551		18.7292
Q8CES0	N-alpha-acetyltransferase 30	1	1	15.9342	15.7808	15.4537	16.0173	15.931	15.9801			15.3423
P32233	Developmentally-regulated GTP-binding protein 1	12	11	26.3161	26.2922	26.1286	25.982	25.9444	26.0259	25.8062	25.7781	25.9701
A0A3B2WC92	Spastin	2	2	19.389	19.1001	19.1271	19.0724	19.0678	19.2735	19.2906	18.3246	18.6675
Q3UEL5	Imidazolonepropionate hydrolase	1	1	19.7394	19.7585		20.3753	19.9244	19.7217	20.0168	18.2887	19.2665
D3YXK2	Scaffold attachment factor B1	3	2	21.4255	21.2001	21.5213	21.0233	20.4131	20.3146	20.7632	21.1422	21.0518
P61211	ADP-ribosylation factor-like protein 1	5	5	23.3497	23.5587	23.833	23.7173	23.6141	23.18	23.4559	23.3358	22.7034
E9PWB8	Tubulin polyglutamylase TTLL7	1	1	21.8624	21.6519	21.6718	19.66	22.1006	21.596	19.1285	21.6858	21.9361
Q9CXF4	TBC1 domain family member 15	7	7	22.9935	23.3839	23.0864	23.1282	23.1045	22.9286	22.7023	22.6778	22.9239
Q91W64	Cytochrome P450 2C70	13	12	24.1151	24.2813	24.3896	25.5891	25.4811	25.6236	23.9941	23.753	23.8683
Q91XD6	Vacuolar protein-sorting-associated protein 36	13	13	24.4683	24.2962	24.2552	24.4734	24.153	24.2383	23.9668	24.0071	23.8789
A2AQ45	Formin-binding protein 1	10	10	22.7635	22.5019	22.533	22.8537	23.0606	23.0579	22.2773	21.8559	22.4452
P62311	U6 snRNA-associated Sm-like protein LSm3	3	3	23.1185	22.7046	23.123	23.0147	22.9996	23.0001	22.8204	22.5509	22.4123
O70310	Glycylpeptide N-tetradecanoyltransferase 1	10	8	25.2938	24.835	25.1023	24.9161	24.8611	25.0757	24.749	24.6244	24.721
O35465	Peptidyl-prolyl cis-trans isomerase FKBP8	1	1	21.5267	21.6479	21.5408	21.3714	21.3369	21.2791	21.1729	20.9514	21.3907
Q7TPV4	Myb-binding protein 1A	8	8	22.91	22.3845	22.8227	22.8248	22.7855	22.7223	22.5066	22.027	22.4226
Q810J8	Zinc finger FYVE domain-containing protein 1	3	3	20.7122	20.7721	20.6083	20.5796	20.5393	20.4388	20.3278	20.293
Q99P68	Sclerostin	1	1	23.5737	23.6679	23.762	22.448	22.2328	22.4424	23.4164	23.1947	23.2251
Q9D1B1	Cystatin E/M	5	5		21.4812	21.3753	21.0043	20.679	20.6993	21.4673	21.6239	18.4037
Q6A009	E3 ubiquitin-protein ligase listerin	5	5	20.8461	20.748	20.8505	20.6829	20.6899	20.7638	20.4393	20.0938	20.6913
P18654	Ribosomal protein S6 kinase alpha-3	20	13	25.9983	25.8626	26.1457	26.0417	25.6981	25.762	25.6209	25.2129	25.9361
E9Q138	Insulin-like growth factor I	9	9	27.8741	27.8247	27.8247	27.4558	27.3829	27.494	27.3921	27.4754	27.4967
P62751	60S ribosomal protein L23a	8	8	27.1207	26.8453	26.8086	26.9364	26.7664	27.0445	26.5001	26.5109	26.6232
P54116	Stomatin	9	9	22.6322	22.653	22.0173	25.0344	24.9471	25.1288	22.2958	21.6005	22.2374
P10922	Histone H1.0	3	3	23.7491	23.7078	24.0086	23.8404	23.9735	23.742	23.4848	23.3688	23.4722
P35283	Ras-related protein Rab-12	5	4	23.6778	23.6545	23.4102	22.8954	22.7866	22.5024	23.1737	23.4493	22.9341
Q9CQ26	STAM-binding protein	4	4	20.991		20.0869	21.0241	18.3407	19.1251	20.8872	18.9662
Q05915	GTP cyclohydrolase 1	8	8	22.8919	22.4945	23.127	22.4942	23.5195	24.2105	21.8937	22.055	23.1438
Q8BH57	WD repeat-containing protein 48	4	4	19.9657		21.4907			19.451	19.4228	21.1618
Q80VD1	Protein FAM98B	5	4	21.5503	21.7285	22.0853	20.9638	21.9302	21.9497	20.4416	20.8297	22.2976
P10639	Thioredoxin	5	5	25.9833	25.9261	25.9462	25.812	25.927	25.8356	25.761	25.4621	25.4789
Q8BGR9	Ubiquitin-like domain-containing CTD phosphatase 1	12	12	23.7505	23.36	23.8986	23.075	22.9408	23.1766	23.4963	23.4598	22.9018
P07759	Serine protease inhibitor A3K	10	7	26.6785	26.577	26.4555	26.4375	26.7504	26.4931	26.1319	26.3913	26.0434
P50580	Proliferation-associated protein 2G4	21	21	28.3046	28.1602	28.3567	28.0981	28.1733	27.9631	27.9937	27.8065	27.895
Q8K0T0	Reticulon-1	1	1	21.5066	21.8283	21.823	21.0596	21.446	21.2346		21.1354	21.539
Q61233	Plastin-2	7	5	21.1039	20.5317	21.2365	19.6765	19.3531	20.2999	20.6278	20.6133	20.5973
Q3U1J4	DNA damage-binding protein 1	3	3		20.1066		20.6646	19.9846	19.3249	19.2884	19.7965	20.0207
Q61937	Nucleophosmin	3	3	25.8987	25.9003	25.7453	25.7915	25.8566	25.9536	25.5101	25.2621	25.638
Q9QWY8	Arf-GAP with SH3 domain, ANK repeat and PH domain-containing protein 1	8	8	23.29	23.2605	23.8502	24.0697	23.8452	23.6779	23.6172	22.4636	23.0593
P41241	Tyrosine-protein kinase CSK	10	10	24.3684	24.7008	24.5492	24.5274	23.7402	23.6465	24.1971	24.1881	24.1408
P34884	Macrophage migration inhibitory factor	2	2			20.9004				19.7634	21.0286
Q9QXZ0	Microtubule-actin cross-linking factor 1	5	5	22.5801	22.9545	24.113	23.7113	23.1517	23.678	22.7423	22.8782	23.3183
Q80WW9	DDRGK domain-containing protein 1	1	1	20.0794		20.491	20.6263	19.9169	20.1034	20.0997		19.7381
O35326	Serine/arginine-rich splicing factor 5	4	3	19.7222	19.969	19.3994	24.7	24.7918	24.8373	19.3575	19.2282	19.4491
G3X8T2	Zinc finger CCCH domain-containing protein 18	1	1			16.7912	17.1297	17.159	16.8465	16.6729		16.1221
Q99KH8	Serine/threonine-protein kinase 24	11	6	23.3262	23.7309	23.5344	23.7525	23.4505	23.3562	23.1273	23.0691	23.3096
P62702	40S ribosomal protein S4, X isoform	19	19	28.6502	28.6991	28.6543	28.4106	28.5765	28.4475	28.4945	28.0863	28.2949
Q9D0I9	Arginine--tRNA ligase, cytoplasmic	32	32	28.596	28.546	28.6562	28.1995	28.1856	28.2118	28.3875	28.1183	28.1819
Q06185	ATP synthase subunit e, mitochondrial	4	4	23.6344	23.4965	23.5378	23.6847	23.296	23.8235	23.2422	23.2429	23.0829
Q61406	Complement factor H-related 1	11	11	29.0782	29.0397	28.9568	28.8262	28.9268	28.9123	28.6528	28.5445	28.7731
Q9JIF0	Protein arginine N-methyltransferase 1	6	5	27.3533	26.9665	27.2277	26.9283	26.6817	26.686	26.7122	27.1159	26.5957
P08074	Carbonyl reductase [NADPH] 2	12	12	24.4313	24.0447	24.1946	24.5866	24.4776	24.4767	23.6515	23.9715	23.9567
Q9DD06	Retinoic acid receptor responder protein 2	5	1	22.3193	22.5137	22.504	22.4848	21.9153	22.0756	21.9859	22.1333	22.1286
Q6A026	Sister chromatid cohesion protein PDS5 homolog A	8	8	21.5583	21.9337	21.6223	21.8179	20.6216	20.8651	20.5983	22.0029	21.0892
P67984	60S ribosomal protein L22	5	5	26.6258	26.7296	26.6771	26.7256	26.7078	26.7442	26.4413	26.2921	26.207
Q9WTX5	S-phase kinase-associated protein 1	4	4	23.036	22.9348	23.1707	23.1753	23.359	23.4264	22.8665	22.5871	22.5957
Q78JW9	Ubiquitin domain-containing protein UBFD1	4	4	23.9143	24.0102	24.0935	23.8099	23.977	23.9027	23.7101	23.4827	23.7352
Q7TNE3	Sperm-associated antigen 7	5	5	29.4321	29.2249	29.5392	27.8782	28.1246	27.8464	29.1354	28.8814	29.1044
Q02105	Complement C1q subcomponent subunit C	5	5	29.2903	29.3432	29.2771	28.6446	28.7321	28.5826	28.9808	28.7979	29.0424
P59325	Eukaryotic translation initiation factor 5	18	18	27.8444	27.7825	27.8154	27.7754	27.8484	27.804	27.4542	27.4466	27.4635
Q9R0P3	S-formylglutathione hydrolase	9	9	30.3466	30.5212	30.407	28.6383	28.6998	28.7311	29.9154	30.1569	30.1189
Q921M3	Splicing factor 3B subunit 3	7	7	21.4336	21.3228	20.0509	21.7014	21.4372	19.8116	19.2254	21.1872	21.002
E9Q555	E3 ubiquitin-protein ligase RNF213	18	18	25.9465	25.9293	26.0903	25.6163	25.5425	25.7038	25.5913	25.6122	25.6904
P29341	Polyadenylate-binding protein 1	27	19	28.5791	28.5005	28.5975	28.3786	28.3746	28.3737	28.2581	28.0903	28.2547
Q9QYC0	Alpha-adducin	11	11	23.6311	22.9972	23.2969	26.3531	26.2501	26.0734	23.0589	23.0995	22.7421
Q9EQF5	Dihydropyrimidinase	10	10	23.4296	23.3244	23.243	23.3654	23.4808	23.3185	23.1545	22.9906	22.7669
A0A0N4SVL8	Multimerin-1	33	33	27.5139	27.4936	27.4359	26.1989	26.2407	26.3466	27.1775	27.0125	27.1848
P47879	Insulin-like growth factor-binding protein 4	8	8	25.8621	25.7873	25.8679	25.2419	25.3048	25.2037	25.4357	25.4499	25.5679
Q9CXR1	Dehydrogenase/reductase SDR family member 7	2	2	22.5779	22.5537	22.6998	22.0127	22.6437	22.8542	22.2847	22.2634	22.2259
Q8VDN2	Sodium/potassium-transporting ATPase subunit alpha-1	20	14	25.3915	25.2211	25.1968	25.9111	25.4231	25.2808	25.0998	24.8055	24.8349
P10637	Microtubule-associated protein tau	3	3	19.3374	19.6131	20.1089	19.966	20.01	19.1069	19.8659	18.8295	19.2254
Q8BQX5	Transmembrane and coiled-coil domain-containing protein 6	1	1	24.05	23.5664	23.6895	22.7696	22.7925	22.4625	23.331	23.3532	23.5977
P83917	Chromobox protein homolog 1	3	3	22.3305	23.1077	22.9508	21.5337	22.3257	22.1317	22.497	22.3167	22.618
P40224	Stromal cell-derived factor 1	2	2	23.2486	23.0734	23.1676	22.5674	22.9676	22.7338	22.5265	22.9414	22.9382
Q61268	Apolipoprotein C-IV	2	2	20.8957	21.1456	20.685				20.4588		20.6756
P62317	Small nuclear ribonucleoprotein Sm D2	5	5	23.6926	23.4076	23.6278	23.2073	23.3133	23.0188	23.163	23.4001	23.1149
E9QAE3	B-TFIID TATA-box-binding protein-associated factor 1	1	1	26.3735	26.3583	26.2953	25.3162	25.2039	25.1976	25.9593	26.1263	25.8861
E9QAQ5	Glycogen synthase kinase-3 beta	9	5	24.2001	24.2076	24.0392	23.3227	23.1526	23.4673	24.0971	23.4411	23.7958
Q9D1G5	Leucine-rich repeat-containing protein 57	6	6	22.7092	20.7746	22.2855	21.7209	21.9354	22.0771	22.3532	21.3988	21.3584
Q05144	Ras-related C3 botulinum toxin substrate 2	7	4	24.2477	24.3772	24.3636	24.2577	24.8078	24.5202	23.9426	23.7846	24.192
Q62318	Transcription intermediary factor 1-beta	11	11	24.2403	23.7305	23.9355	23.7978	23.5701	23.5426	23.7921	23.4414	23.6541
P10126	Elongation factor 1-alpha 1	28	17	32.239	32.4116	32.2812	32.1316	32.1885	32.244	31.9555	31.9577	31.981
Q91YH5	Atlastin-3	10	10	22.3306	24.9143	22.5179	23.3175	24.3042	23.2693	22.8569	22.6367	24.2241
Q9CZE3	Ras-related protein Rab-32	6	6	24.1084	24.1524	24.0623	23.8237	23.9705	24.1231	23.7356	23.5949	23.9337
Q3TLP8	Ras-related C3 botulinum toxin substrate 1	10	7	27.7363	27.8077	27.7349	27.5797	27.4851	27.5294	27.3728	27.4129	27.4558
P62911	60S ribosomal protein L32	5	5	24.0243	24.0465	23.9964	24.3433	24.1421	24.4852	23.8925	23.3451	23.7394
O35445	E3 ubiquitin-protein ligase RNF5	1	1	16.0909	16.0141	15.6708	17.5929	17.4824	17.293	16.1704	14.4928	15.6455
Q9CWZ3	RNA-binding protein 8A	4	4	21.3221	20.8313	20.9591	23.9873	21.1248	21.0038	20.9995	20.5799	20.4897
Q3TDD9	Protein phosphatase 1 regulatory subunit 21	5	5	22.5694	22.3962	22.2924	22.4045	22.3219	22.161	21.9795	21.8759	22.3401
A0A5H1ZRL4	Schlafen family member 9 (Fragment)	1	1	21.3911	21.2188	21.0559	20.5193	20.7385	20.5906	21.1051	20.6509	20.86
P35700	Peroxiredoxin-1	20	20	31.3005	31.3281	31.2987	31.1501	31.1311	31.2491	31.0136	30.9092	30.9713
P26041	Moesin	34	22	29.4833	29.5384	29.4215	29.4511	29.5787	29.5553	29.1588	29.0201	29.2278
Q62159	Rho-related GTP-binding protein RhoC	10	2	23.3088	23.2511	23.0612	23.3346	23.1422	23.1363	23.268	22.33	22.854
P34914	Bifunctional epoxide hydrolase 2	3	3	23.94	23.9597	24.2068	22.1001	22.1586	22.1901	23.716	23.6263	23.7478
Q3UGC7	Eukaryotic translation initiation factor 3 subunit J-A	11	11	27.9449	28.0934	27.9716	27.028	27.0632	27.0962	27.5626	27.6841	27.7331
P40124	Adenylyl cyclase-associated protein 1	27	27	28.7678	28.7828	28.7686	28.4564	28.5089	28.4683	28.4245	28.3339	28.5263
Q8BFY9	Transportin-1	19	19	25.1445	24.9018	25.1133	25.3484	25.394	25.3788	24.9387	24.6448	24.5297
P48787	Troponin I, cardiac muscle	2	2	22.4718	21.5445	22.1056	21.6992	21.5238	21.945	21.9968	21.2735	21.8733
P63280	SUMO-conjugating enzyme UBC9	2	2	26.8712	26.6401	26.7477	25.1479	25.0019	24.986	26.5606	26.489	26.1619
Q8BVA5	Lipid droplet-associated hydrolase	5	5	23.3482	23.5905	23.8696	21.5955	22.6732	23.3824	22.7862	23.2192	23.6845
Q6ZPE2	Myotubularin-related protein 5	3	3	16.2983	16.5119	16.0703	16.7216	16.7322	16.7736	16.7123	14.7382	15.7981
P68040	Receptor of activated protein C kinase 1	16	16	26.465	26.6548	26.5146	26.845	26.8304	26.7564	26.2448	26.1546	26.2168
Q8CIE0	Serpin A11	3	3	22.6667	22.6	22.5076	21.0056	22.645	22.6445	22.1249	22.2231	22.3945
P16330	2',3'-cyclic-nucleotide 3'-phosphodiesterase	12	12	24.6417	24.5132	24.7256	24.4125	24.4235	24.5857	24.4014	24.0634	24.3771
Q08943	FACT complex subunit SSRP1	6	6	21.4674	21.8868	21.4342	21.6453	22.1724	22.1681	21.4792	21.1186	21.1888
Q80X73	Protein pelota homolog	2	2	24.2314	24.2966	24.2147	23.8207	23.8724	24.0683	23.9393	23.7418	24.0294
Q99020	Heterogeneous nuclear ribonucleoprotein A/B	7	6	26.0446	26.0259	26.0219	25.9796	26.136	25.9836	25.7512	25.6326	25.6883
Q9JMG1	Endothelial differentiation-related factor 1	5	5	23.1625	23.0305	23.1014	22.0264	22.1109	22.6214	23.1181	22.1328	22.8592
O70251	Elongation factor 1-beta	10	8	26.2629	26.1866	26.3873	26.3774	26.6515	26.448	26.0021	25.9619	25.8615
Q9D0T1	NHP2-like protein 1	5	5	23.6063	23.3545	23.6264	23.1501	23.1957	23.3876	23.3172	23.1046	23.1576
O35900	U6 snRNA-associated Sm-like protein LSm2	5	5	23.9611	23.7979	24.0843	23.7164	22.6978	23.5174	23.2484	23.9887	23.5061
Q8CCJ3	E3 UFM1-protein ligase 1	15	15	24.6011	24.3183	24.2945	24.7397	24.6978	24.6171	24.0498	24.2574	23.891
Q7M723	Taste receptor type 2 member 104	1	1	20.2891	20.6746	20.4707				20.219	19.9473	20.2616
Q8BVQ5	Protein phosphatase methylesterase 1	9	9	23.5132	23.2497	23.3009	23.481	23.5864	23.6339	22.9035	22.7529	23.3424
P28843	Dipeptidyl peptidase 4	18	18	27.6486	27.5719	27.5369	28.0046	28.0796	27.9404	27.2782	27.3637	27.0945
A2A930	Histone-lysine N-methyltransferase PRDM16	1	1	24.8924	24.746	24.9118	25.0057	25.1116	25.0484	24.5597	24.3596	24.6146
J3QPQ1	F-BAR domain only protein 2	1	1	18.9096			19.7304		19.3589	18.5732
P11352	Glutathione peroxidase 1	15	15	26.9172	26.8204	27.9915	27.2971	27.3448	27.2207	27.039	27.1084	26.8768
Q9WUR2	Enoyl-CoA delta isomerase 2	10	10	23.1658	23.0498	23.4856	24.1078	24.1121	24.1268	23.0713	22.8776	22.7661
Q9Z204	Heterogeneous nuclear ribonucleoproteins C1/C2	7	7	26.2555	26.2919	26.4105	26.2125	26.2924	26.1782	25.8881	26.0343	26.0319
P47968	Ribose-5-phosphate isomerase	1	1	16.5299	16.8693	16.4057	17.3913	17.2548	16.9949	16.6183	15.4355	16.5214
O35685	Nuclear migration protein nudC	16	16	29.7811	29.7066	29.9518	29.1922	28.7308	28.7622	29.4317	29.562	29.454
Q61696	Heat shock 70 kDa protein 1A	6	3	20.172	20.4259	20.3373	20.4641	20.5085	20.3883	19.9539	20.0422	19.9546
P12970	60S ribosomal protein L7a	17	17	27.1608	27.1183	27.0567	26.3653	26.6061	26.7126	27.0623	26.6248	26.6108
Q3UMP4	Plasminogen activator inhibitor 1 RNA-binding protein	7	7	23.9654	23.906	23.6293	24.4034	24.421	24.584	23.4838	23.4268	23.6133
Q9D4H8	Cullin-2	20	20	26.7238	26.5431	26.7161	26.7579	26.6809	26.5902	26.2693	26.4667	26.252
A0A0N4SVV4	Chemerin	6	2	27.1227	26.9343	27.01	26.8594	26.6895	26.7199	26.7098	26.7602	26.6077
P47811	Mitogen-activated protein kinase 14	5	4	21.4085	21.5774	21.4689	21.6245	22.5731	20.8789	21.8526	19.6387	21.2002
Q9DBG6	Dolichyl-diphosphooligosaccharide--protein glycosyltransferase subunit 2	4	4	24.2911	23.9696	23.7928	24.1107	24.1057	24.1465	23.9835	23.3751	23.6885
E9Q616	AHNAK nucleoprotein (desmoyokin)	146	146	29.8242	29.7778	29.7501	29.676	29.7795	30.9737	29.5398	29.3528	29.471
Q5ND29	Rab-interacting lysosomal protein	3	3	22.2496	21.9217	21.6065	20.7531	20.7276	20.5211	21.6467	21.4862	21.7231
P63085	Mitogen-activated protein kinase 1	4	2	20.8889	21.0877	21.143	20.8373	20.6309	20.9227	20.9829	20.6087	20.5173
Q61398	Procollagen C-endopeptidase enhancer 1	10	10	25.6276	25.5841	25.3956	25.3227	27.1056	25.3867	25.2029	25.2269	25.2097
Q5SUF2	Luc7-like protein 3	1	1	20.3868	20.1199	20.4109	20.1698	20.4635	20.4327	20.0682	19.4698	20.301
Q61655	ATP-dependent RNA helicase DDX19A	16	16	25.7245	25.4804	25.5417	25.8073	25.8853	25.9928	25.2317	25.0872	25.443
Q6PDI5	Proteasome adapter and scaffold protein ECM29	44	44	26.7541	26.6337	26.7274	26.3696	26.1804	26.371	26.3269	26.4214	26.3965
Q9CQ80	Vacuolar protein-sorting-associated protein 25	4	4	23.6942	23.3883	23.6023	24.0931	24.1086	23.9304	23.4447	22.9646	23.2816
P70122	Ribosome maturation protein SBDS	13	13	25.3122	25.3476	25.4037	25.0989	25.1096	25.139	25.0374	24.9262	25.1243
Q14DQ1	Protein FAM219B	1	1	19.3944	19.6515	19.693	19.8001	19.6523	19.9167	19.0963	18.8811	19.6855
Q8BMA6	Signal recognition particle subunit SRP68	11	11	25.2897	25.223	25.4084	25.016	24.997	24.8493	25.0085	24.9778	24.9721
A0A0U1RPI4	Zinc finger protein 235 (Fragment)	1	1	20.2914	20.6651	20.7612	21.1191	21.075	20.8557	20.4648	20.1767	20.1263
P09803	Cadherin-1	6	6	24.4977	24.2256	24.2057	24.183	24.3128	24.2028	24.1946	23.7635	23.9925
Q920E5	Farnesyl pyrophosphate synthase	7	7	27.7234	27.3465	27.2853	27.1222	27.0722	26.9828	27.4143	26.9474	27.0239
P31532	Serum amyloid A-4 protein	11	11	31.1217	31.0976	31.0027	30.5291	30.6025	30.6131	30.9465	30.3217	30.9114
P35282	Ras-related protein Rab-21	6	6	24.9299	25.019	25.2517	25.0767	25.2642	25.0702	25.0448	24.5256	24.633
Q99L45	Eukaryotic translation initiation factor 2 subunit 2	13	13	25.9891	26.0532	25.9496	25.7833	25.8724	25.8309	25.7769	25.579	25.6706
Q8BWQ1	UDP-glucuronosyltransferase 2A3	4	3	22.6713	22.3617	22.5357	23.1763	23.2569	23.0501	22.1145	22.4458	22.0311
Q9D6N5	Dr1-associated corepressor	1	1	21.0829	20.7384	21.1385	20.7637	20.8922	20.9635	20.7396	20.5848	20.705
Q99JB8	Protein kinase C and casein kinase II substrate protein 3	7	7	24.002	23.5744	23.6211	23.6288	23.4088	23.3414	23.6161	23.3578	23.2842
Q922Q8	Leucine-rich repeat-containing protein 59	7	7	26.5812	26.4152	26.5123	26.4492	26.4694	26.2835	26.2774	25.9853	26.2746
Q8BLY2	Threonine--tRNA ligase 2, cytoplasmic	11	10	26.9002	26.7601	26.7044	26.3507	26.0291	26.141	26.5243	26.5576	26.3239
Q8K212	Phosphofurin acidic cluster sorting protein 1	10	9	22.2423	22.1417	21.8064	21.2638	21.37	21.4194	21.9276	21.6788	21.655
P47809	Dual specificity mitogen-activated protein kinase kinase 4	9	9	27.0071	27.0019	27.0296	27.4124	27.5381	27.6097	26.8058	26.6243	26.6592
A0A087WS16	Collagen, type VI, alpha 3	37	37	26.5169	26.4041	26.3208	26.0829	26.1263	26.2101	26.1261	26.0316	26.1485
Q99JT2	Serine/threonine-protein kinase 26	12	7	24.0484	23.8039	23.5618	23.7194	23.9424	23.7692	23.7142	23.4007	23.3782
A0A494B923	3'-phosphoadenosine-5'-phosphosulfate synthase	35	33	28.9786	28.8136	28.8832	29.0706	29.0925	29.0904	28.6199	28.5584	28.5648
Q80UJ7	Rab3 GTPase-activating protein catalytic subunit	4	4	22.9075	22.5711	22.3712	22.7512	22.181	22.3519	22.078	22.3126	22.5381
E9Q735	Ubiquitin conjugation factor E4 A	10	10	24.5307	24.7712	24.7941	22.9088	22.5161	22.7475	24.047	24.9854	23.8861
Q921H8	3-ketoacyl-CoA thiolase A, peroxisomal	12	6	26.6072	26.451	26.5234	26.9033	26.8665	26.7555	26.1905	26.3545	26.1004
Q61247	Alpha-2-antiplasmin	11	11	27.2009	27.1694	27.198	27.1741	26.9674	26.906	26.8166	26.82	26.9962
Q9Z2I8	Succinate--CoA ligase [GDP-forming] subunit beta, mitochondrial	12	12	25.8978	25.9577	25.9275	25.8766	25.8656	25.8408	25.5986	25.7847	25.4537
P48024	Eukaryotic translation initiation factor 1	5	5	27.6068	27.3751	27.578	26.7997	26.9785	27.3605	26.9858	27.1707	27.4491
P21180	Complement C2	18	9	24.5283	24.266	25.2749	24.4557	24.4097	24.678	24.4626	24.3969	24.4798
Q9QXD8	LIM domain-containing protein 1	1	1	13.6471	13.7255	12.909	14.3472	13.9515	13.4701	13.358		12.9367
P27659	60S ribosomal protein L3	11	11	25.2627	25.2004	25.3588	25.3839	25.5658	25.2573	24.99	24.8367	25.066
E9PWB2	Casein kinase I isoform alpha	7	7	23.1743	23.0775	22.7395	22.6024	23.1472	22.8097	22.9188	22.4792	22.6715
P35293	Ras-related protein Rab-18	10	10	25.4778	25.285	25.4729	25.592	25.565	25.3933	25.3537	24.92	25.0122
P10711	Transcription elongation factor A protein 1	12	12	25.2166	25.2791	25.2981	25.0556	25.078	25.1403	24.9232	25.0297	24.9185
O88783	Coagulation factor V	61	61	29.9416	29.9382	29.8925	29.5303	29.5046	29.5287	29.5648	29.5964	29.6895
P28271	Cytoplasmic aconitate hydratase	9	9	25.4549	25.0633	25.3452	24.621	24.5373	25.2278	25.0042	24.8556	25.102
Q9D554	Splicing factor 3A subunit 3	6	6	22.5617	22.3606	22.3027	22.0253	21.6495	22.6986	22.3457	22.0701	21.8631
P62245	40S ribosomal protein S15a	7	7	26.9254	26.7167	26.7474	26.7613	26.6889	26.7496	26.675	26.2929	26.4873
P11714	Cytochrome P450 2D9	8	4	22.7415	22.7383	22.503	22.9944	22.405	22.3073	22.1752	22.641	22.2136
P0C605	cGMP-dependent protein kinase 1	4	4	22.4653	22.5858	22.2789	22.3793	22.2095	22.0301	21.8422	22.4915	22.0142
Q8R050	Eukaryotic peptide chain release factor GTP-binding subunit ERF3A	17	17	26.8844	26.6535	26.7264	26.8467	26.8804	27.0411	26.5039	26.3101	26.5341
Q6DFW4	Nucleolar protein 58	9	9	24.3022	24.424	24.3462	24.2303	24.0061	24.1678	24.1221	23.9639	24.0709
Q9JLI0	Aldo-keto reductase a	9	8	25.1339	24.7274	24.9708	24.5346	24.6009	24.6034	24.5621	24.6376	24.7435
Q9WUA2	Phenylalanine--tRNA ligase beta subunit	18	18	26.6121	26.6391	26.6761	27.0067	26.8724	26.9738	26.4045	26.2598	26.3491
Q58A65	C-Jun-amino-terminal kinase-interacting protein 4	2	2	21.7353	21.7297	21.6408	21.3751	21.7197	21.6364	21.2487	21.1698	21.7163
Q6PHZ2	Calcium/calmodulin-dependent protein kinase type II subunit delta	10	8	28.1464	28.3253	28.3169	27.8153	27.9007	27.8255	27.9619	28.1038	27.807
Q80XL6	Acyl-CoA dehydrogenase family member 11	20	20	24.4393	24.4914	24.3752	24.9171	24.5768	24.8087	24.2535	23.9898	24.1452
Q8BM55	Transmembrane protein 214	6	6	20.1295	19.8675	20.1249	20.7746	21.0988	21.1463	19.7167	19.5769	19.916
P63254	Cysteine-rich protein 1	6	6	28.1062	28.1472	28.2525	27.6386	27.5764	27.7709	27.9358	27.8671	27.7971
O08689	Growth/differentiation factor 8	6	6	21.1378	21.2961	20.8004	21.0741	20.9568	21.0475	21.3847	19.7131	20.8158
P49710	Hematopoietic lineage cell-specific protein	8	8	23.48	23.5722	23.3609	23.2135	23.359	23.973	23.478	22.7166	23.2242
Q60936	Atypical kinase COQ8A, mitochondrial	3	3	24.6421	24.5329	24.6182	23.5116	23.3155	23.2559	24.3028	24.4642	24.1054
Q61316	Heat shock 70 kDa protein 4	2	2	19.8076	19.8086	20.1278	19.6093	19.2597	19.8745	19.5799	19.7889	19.4812
Q99ME2	WD repeat-containing protein 6	2	2	18.023	17.6478	17.4483	17.6876	17.646	17.6348	17.7447	16.8946	17.5117
B2RXZ2	Cyp2a22 protein	7	2	19.6868			20.7106	20.7459	21.1772	19.3868
Q1W617	Protein Shroom4	1	1	21.0261	20.8024	21.2079	21.3552	21.0316			20.6122	20.8234
Q07968	Coagulation factor XIII B chain	29	29	28.9873	29.368	29.4755	29.0401	28.7377	29.0302	28.8928	29.0301	29.0494
Q99KQ4	Nicotinamide phosphoribosyltransferase	20	20	27.0071	26.96	26.9852	27.215	27.2288	27.3785	26.6686	26.6758	26.7144
P62918	60S ribosomal protein L8	9	9	26.6511	26.3763	26.9299	26.5176	26.7383	26.4244	26.3262	26.4787	26.3067
Q91XC9	Peroxisomal membrane protein PEX16	2	2	19.0969	19.0064	19.0612	18.6834	19.1365	19.4892	18.9536	18.679	18.6183
P07356	Annexin A2	26	26	29.1501	29.1377	29.2366	29.2187	29.3119	29.1927	28.8206	28.9559	28.8543
Q9Z0N1	Eukaryotic translation initiation factor 2 subunit 3, X-linked	18	18	26.5557	26.6965	26.3049	26.2473	26.3047	26.3834	26.1592	26.212	26.3165
A2AJN7	Sodium bicarbonate transporter-like protein 11	1	1	20.2726	19.6841	20.472	19.3925	18.9256	20.6817	20.2955	19.1938	19.9509
P62331	ADP-ribosylation factor 6	7	7	24.9824	23.6396	23.8211	23.8918	23.2429	23.186	22.9753	24.3514	24.2578
E9Q1P8	Interferon regulatory factor 2-binding protein 2	3	3	21.1862	21.1294	21.2157	21.1184	20.8945	20.6792	21.0324	20.9651	20.6178
Q99JY3	GTPase IMAP family member 4	9	9	24.1352	24.0597	24.0587	24.4059	24.2048	24.3345	23.8154	23.7315	23.8225
Q6ZWX6	Eukaryotic translation initiation factor 2 subunit 1	17	17	26.6343	26.5413	26.5758	26.4075	26.3499	26.3186	26.1868	26.2778	26.3984
Q5YD48	APOBEC1 complementation factor	16	15	24.7915	24.6132	24.8298	24.734	24.538	24.6434	24.5111	24.3451	24.5009
Q505F5	Leucine-rich repeat-containing protein 47	12	12	25.3971	25.3405	25.0737	24.8095	24.8798	24.9073	25.0289	24.9398	24.9815
Q91ZX7	Prolow-density lipoprotein receptor-related protein 1	12	12	23.0815	22.3856	22.1668	22.3734	22.5366	22.5607	22.3788	22.5093	21.9787
Q9CSH3	Exosome complex exonuclease RRP44	2	2	19.1978	19.1625	19.2657	19.3671	19.2861	19.3345	19.2196	18.4198	18.998
A6H6A9	Rab GTPase-activating protein 1-like	4	4	27.8813	27.8637	27.6174	27.8145	27.9085	27.8448	27.2624	27.8417	27.3233
P48678	Prelamin-A/C	19	19	24.818	24.6493	24.5466	24.7233	24.8866	24.7966	24.5553	24.2441	24.3336
Q9DBM2	Peroxisomal bifunctional enzyme	37	37	28.2026	28.1561	28.191	28.451	28.4477	28.4641	27.9242	27.8328	27.9167
Q8R0V5	Indoleamine 2,3-dioxygenase 2	3	3	22.3923	22.1739	22.3353	22.6731	22.9042	22.7553	21.8055	22.0515	22.1573
O88998	Noelin	2	2	20.0638	20.3694	19.8703		19.6278	19.6248	19.3918	19.83	20.1549
Q8BUR4	Dedicator of cytokinesis protein 1	5	5	21.0481	20.9181	21.563	17.7388	17.653	21.3813	20.9142
Q9JM62	Receptor expression-enhancing protein 6	4	4	25.1115	25.102	25.0628	25.5457	25.4902	25.6678	25.088	24.5486	24.7169
Q91YZ8	Polyadenylate-binding protein	20	12	26.4235	26.0809	26.3636	26.1677	26.1391	26.0764	26.0413	26.0011	25.9783
Q3UKJ7	WD40 repeat-containing protein SMU1	2	2	19.8883	20.0607	20.1321	19.8693	19.4759	19.8268		19.6326	19.8418
Q8K124	Pleckstrin homology domain-containing family O member 2	3	3	17.9074		18.3262	18.6528	19.218	19.2345		17.8429
P26040	Ezrin	36	26	29.6408	29.5463	29.5513	29.4385	29.3662	29.381	29.3203	29.3173	29.2347
Q3UDE2	Tubulin--tyrosine ligase-like protein 12	3	3	21.7502	21.0087	21.5227	21.1105	21.0259	20.7526	21.2891	21.068	21.1463
Q922I7	Polypyrimidine tract-binding protein 1	12	10	25.7042	25.6437	25.6371	25.4436	25.559	25.7764	25.3481	25.5205	25.2379
Q9D023	Mitochondrial pyruvate carrier 2	2	2	21.6138	21.1148	21.1362	20.431	19.9624	20.468	21.3078	20.483	21.1434
Q8BGG9	Acyl-coenzyme A amino acid N-acyltransferase 2	4	4	22.2833	22.7869	22.5185	22.1805	22.3459	22.1606	21.6774	22.4657	22.49
Q6ZQ58	La-related protein 1	15	15	23.0492	22.9408	22.92	23.0269	22.8183	22.8507	23.0484	22.4766	22.4436
Q60598	Src substrate cortactin	10	10	24.5749	24.5656	24.2978	24.5256	24.407	24.4823	24.3014	23.9627	24.3048
P11031	Activated RNA polymerase II transcriptional coactivator p15	5	5	26.1424	26.184	26.1958	26.0111	25.9772	26.0186	25.8027	25.9401	25.9185
P98086	Complement C1q subcomponent subunit A	10	10	29.3686	29.4019	29.292	28.818	28.934	28.9502	28.9675	29.0956	29.1399
Q99P72	Reticulon-4	6	6	20.7528	21.7678	21.7332	22.4259	22.375	22.537	21.8289	20.8502	20.6321
Q91W50	Cold shock domain-containing protein E1	19	19	26.525	26.3416	26.3714	26.1533	25.9894	26.0825	26.1468	26.2102	26.0281
P70670	Nascent polypeptide-associated complex subunit alpha, muscle-specific form	28	28	27.8966	27.9295	27.983	27.7375	27.939	27.7317	27.6722	27.7252	27.5547
Q9CW03	Structural maintenance of chromosomes protein 3	6	6	20.0325	20.065	20.4939	20.0784		19.8182	19.707	20.171	19.8701
Q71FD7	Filamin-binding LIM protein 1	3	3	21.0663	19.8626	20.5427	19.5658		19.4222		20.3012	20.2751
Q8R2U6	Diphosphoinositol polyphosphate phosphohydrolase 2	3	3	21.7419		21.7052	21.7778	21.713	21.6036	21.8135	20.6912	21.5923
P62196	26S proteasome regulatory subunit 8	18	17	26.1189	26.2108	26.1128	25.5775	25.6538	25.5661	25.811	25.9235	25.8618
Q9QXY6	EH domain-containing protein 3	22	12	25.757	25.5355	25.7417	25.6373	25.7932	25.5921	25.3909	25.5046	25.3002
P01823	Ig heavy chain V region 36-60	1	1	24.2093	24.273	23.84		23.8186		23.3889	24.4257	23.4554
Q3UQ44	Ras GTPase-activating-like protein IQGAP2	48	44	27.3872	27.4273	27.5527	27.4998	27.5737	27.3966	27.1909	27.1309	27.2123
P63024	Vesicle-associated membrane protein 3	2	2	21.0149	21.1403	21.2957	21.3548	21.1043	21.0942	21.0251	21.0366	20.5074
Q9DBL7	Bifunctional coenzyme A synthase	9	9	25.5522	25.5466	25.4532	25.7055	25.537	25.5673	25.4201	24.8988	25.3477
Q9QYF1	Retinol dehydrogenase 11	3	3	21.3949	21.5437	21.858	22.1424	21.8261	21.9025	21.5347	21.2016	21.242
P28474	Alcohol dehydrogenase class-3	12	12	26.9511	26.754	26.8897	26.77	26.7389	26.8433	26.6351	26.5346	26.5969
F6Q404	Protein disulfide-isomerase A3 (Fragment)	5	1	24.0691	23.7564	23.7973	24.5901	24.7433	24.6394	23.5768	23.7551	23.4636
Q9EQP2	EH domain-containing protein 4	24	20	26.7727	26.5559	26.7976	26.4676	26.5323	26.4939	26.4689	26.3977	26.439
Q8VI75	Importin-4	4	4	20.6184	19.2721	19.2247	19.7212	19.7248	18.0606	20.1451	18.5975	19.6106
Q80X19	Collagen alpha-1(XIV) chain	26	26	26.0342	25.8774	25.9306	25.9114	25.9793	25.9244	25.7752	25.6817	25.5517
A2ATY4	Zinc finger and BTB domain-containing 34	1	1	21.6826	21.9443	21.5145	20.1932	20.7677	20.9375	21.3319	21.4047	21.5962
Q920B9	FACT complex subunit SPT16	7	7	22.2981	22.9381	22.0724	22.0244	22.169	22.3135	22.3554	22.1096	22.1482
P14733	Lamin-B1	2	2	19.3658	19.2521	19.2047	19.4637	19.2527	19.4674		19.1063	18.8853
Q91WQ3	Tyrosine--tRNA ligase, cytoplasmic	33	33	27.8608	27.869	27.852	27.7272	27.6991	27.7056	27.6037	27.5469	27.6043
Q64213	Splicing factor 1	7	7	24.3841	24.5303	24.4944	24.3492	24.4038	24.2885	24.2206	24.0147	24.335
Q61081	Hsp90 co-chaperone Cdc37	12	12	28.8683	28.8311	28.7466	28.2483	28.3469	28.2266	28.6643	28.3623	28.5821
Q9JLN9	Serine/threonine-protein kinase mTOR	11	11	24.2188	24.2087	23.9643	23.4184	23.4743	23.3856	23.9809	23.7486	23.8458
Q9CZ30	Obg-like ATPase 1	23	23	29.0762	29.0251	29.0895	28.9898	28.9638	29.0123	28.8161	28.7234	28.8333
Q61508	Extracellular matrix protein 1	34	5	30.4444	30.4142	30.4474	30.2601	30.3395	30.2837	30.2175	30.0937	30.1782
Q91YW3	DnaJ homolog subfamily C member 3	7	7	22.4472	22.2821	22.2228	23.2389	22.9555	23.2038	22.0781	21.8524	22.1987
P61290	Proteasome activator complex subunit 3	4	4	22.0031	22.0228	22.3237	21.9332	22.1857	22.1753	21.0922	22.3749	21.8192
Q99K51	Plastin-3	7	5	23.0788	22.7223	22.6342	22.6072	22.0855	22.1513	22.6416	22.4172	22.5989
Q9QXE0	2-hydroxyacyl-CoA lyase 1	5	5	22.8672	22.8275	22.4364	23.2043	23.5474	23.3846	22.6485	22.0219	22.6128
A0A0R4J039	Histidine-rich glycoprotein	31	31	34.1615	34.0619	34.1024	33.8654	33.836	33.7623	33.769	33.9162	33.8345
P58281	Dynamin-like 120 kDa protein, mitochondrial	13	13	24.2863	24.4826	24.1044	24.2735	24.3713	24.3605	24.211	23.8404	24.0198
A0A0G2JDE1	Immunoglobulin heavy variable V8-12 (Fragment)	1	1	21.0972	20.9336	20.8317	20.3747	20.4626	20.6685		20.9419	20.3869
Q9JHU4	Cytoplasmic dynein 1 heavy chain 1	148	148	29.0323	28.9829	29.0123	29.1928	29.2469	29.0069	28.5104	28.853	28.8385
O88569	Heterogeneous nuclear ribonucleoproteins A2/B1	19	19	28.3419	28.2744	28.3105	28.1461	28.1269	28.2463	27.9764	28.119	28.029
P25444	40S ribosomal protein S2	9	9	25.7649	25.9329	25.9278	25.6336	25.6628	25.678	25.5793	25.6084	25.6453
Q8CCF0	U4/U6 small nuclear ribonucleoprotein Prp31	2	2	19.9169	19.568	20.1112	19.4099	19.6949	19.5165	19.8491	19.5225	19.4475
P26638	Serine--tRNA ligase, cytoplasmic	23	23	27.3956	27.0823	27.3854	27.3956	27.2421	27.2796	27.0057	27.0321	27.0523
Q9Z199	Transcription elongation factor SPT4-B	2	2	20.9318	20.8472	21.1292	21.2262	20.9764	20.9396	21.0194	20.4822	20.5692
Q8K370	Acyl-CoA dehydrogenase family member 10	6	6	21.1377	21.1287	21.1184	20.9378	21.5429	21.419	21.0994	20.8757	20.5692
Q9QXD1	Peroxisomal acyl-coenzyme A oxidase 2	4	4	26.0759	26.4452	26.3872	25.0907	24.998	25.2424	25.9013	25.9263	26.2837
Q8VBT2	L-serine dehydratase/L-threonine deaminase	9	9	26.8415	26.9948	26.8963	26.8021	26.919	26.8005	26.6104	26.8225	26.4942
Q4VAA2	Protein CDV3	1	1	19.9598	18.8643	19.5911	19.0895	18.687	18.9252	19.5916	18.8717	19.2787
Q8R0X7	Sphingosine-1-phosphate lyase 1	1	1	23.0128	22.8807	22.7933	22.3877	22.8584	22.5029	22.6549	22.4077	22.8151
Q3TWW8	Serine/arginine-rich splicing factor 6	5	4	24.9469	24.8932	24.9472	24.9991	25.0447	25.1364	24.7408	24.5854	24.6715
P97351	40S ribosomal protein S3a	17	17	30.4997	30.3788	30.3017	30.3989	30.2688	30.375	30.0064	30.0088	30.3575
Q9JMD3	START domain-containing protein 10	11	11	28.5625	28.3398	28.3594	28.4663	28.678	28.5487	28.1929	28.2329	28.0567
Q9D8N0	Elongation factor 1-gamma	16	16	29.1822	29.1099	29.1633	29.2295	29.3079	29.1092	28.9736	28.9289	28.7626
Q8K003	Translation machinery-associated protein 7	1	1	23.2456	23.3919	23.2377	22.5622	22.6904	22.6823	23.144	22.7099	23.1981
Q9Z1T1	AP-3 complex subunit beta-1	20	20	24.7432	24.7414	24.6764	24.8224	24.6173	24.8093	24.3727	24.5574	24.4452
A0A0R4J0R1	Vesicle-associated membrane protein 8	2	2	22.0062	22.1748	21.9968	22.3176	22.1917	22.5009	22.1325	20.9266	22.0623
Q61990	Poly(rC)-binding protein 2	12	8	25.9758	26.1293	25.9311	26.1484	26.1471	26.0507	25.6768	25.7424	25.8444
A0A140T8M4	Immunoglobulin kappa variable 8-19	2	1	20.9813	20.7993	21.0364	20.6586	20.4079	20.1249	20.7534	20.588	20.7136
Q9QYJ0	DnaJ homolog subfamily A member 2	14	14	27.0084	26.959	26.8193	26.4831	26.4488	26.592	26.843	26.5309	26.6355
A0A2R8VHW2	Ribosomal L1 domain-containing protein 1 (Fragment)	1	1	19.8744	19.7971	19.8188	19.6072	19.8772	20.4076	18.8798	19.8452	19.8099
A2A5E1	DnaJ homolog subfamily C member 7	9	9	25.6025	25.4391	25.3517	24.9589	24.9387	25.066	25.3716	25.2746	24.9616
Q80WJ7	Protein LYRIC	6	6	24.3936	24.4655	24.3804	23.9715	24.1614	23.7667	24.1112	24.2575	24.1012
P04919	Band 3 anion transport protein	24	24	27.81	27.8869	27.8288	29.7449	29.7171	29.7869	27.6482	27.4674	27.6429
Q3TBD2	Rho GTPase-activating protein 45	4	4	21.7322	22.1688	22.4053	21.6081	21.6055	21.9019	21.9693	21.5703	22.0412
Q8BMB3	Eukaryotic translation initiation factor 4E type 2	1	1	19.7468	19.2077	19.9581		20.1086	20.1878	20.049	19.2838	18.5268
Q9WUK2	Eukaryotic translation initiation factor 4H	7	7	25.031	24.8539	24.9001	23.6352	23.5198	23.5228	24.723	24.5426	24.7566
Q8R2P8	Lysine--tRNA ligase	25	25	28.1315	28.1096	28.1397	27.2477	28.1289	27.2651	27.8419	27.9109	27.87
Q9D020	Cytosolic 5'-nucleotidase 3A	8	8	22.6618	22.9499	22.9226	21.3577	21.3996	21.0795	22.678	22.468	22.6399
Q60865	Caprin-1	10	10	24.4148	24.6756	24.1106	24.1251	24.1808	24.1044	24.1265	24.2692	24.0985
Q9D1D4	Transmembrane emp24 domain-containing protein 10	3	3	24.246	24.2859	24.3557	24.1583	24.0236	23.9111	24.0357	24.2358	23.8349
Q501P1	Fibulin-7	2	2	17.2681	17.2842	17.3079	16.496	16.8709	16.6583		17.0352
O89086	RNA-binding protein 3	2	2	23.1792	23.6462	22.5548	22.938	22.8225	22.7503	23.3483	22.79	22.5755
Q60864	Stress-induced-phosphoprotein 1	34	33	29.4265	29.4308	29.3731	29.3536	29.5077	29.5014	29.2291	29.0165	29.2243
P46467	Vacuolar protein sorting-associated protein 4B	14	10	25.2132	25.0875	25.163	25.2736	25.3871	25.2924	24.8423	24.8718	24.9971
P51660	Peroxisomal multifunctional enzyme type 2	30	30	27.4963	27.4546	27.6282	27.9751	28.0318	28.1186	27.3734	27.1543	27.3003
Q9Z1Q9	Valine--tRNA ligase	41	41	28.4205	28.3758	28.3595	28.3597	28.3413	28.45	28.0497	28.1071	28.2458
Q8VCU2	Glycosyl-phosphatidylinositol-specific phospholipase D	28	28	29.1696	29.2333	29.3616	29.3227	29.2568	29.2043	28.5554	29.2426	29.1364
P83940	Elongin-C	3	3	20.6584	20.6111	20.5408	20.8914	20.9443	20.4971	20.3452	20.4037	20.3159
P63017	Heat shock cognate 71 kDa protein	22	18	28.6554	28.6216	29.0052	28.6305	28.878	28.6572	28.6584	28.4449	28.4547
P70336	Rho-associated protein kinase 2	22	18	23.3051	23.2368	23.1091	23.525	23.4493	23.2696	23.0057	22.7802	23.107
Q9D1G1	Ras-related protein Rab-1B	9	3	27.0307	26.8888	26.9078	26.7104	26.7587	26.7883	26.9578	26.4516	26.6334
B2M1R6	Heterogeneous nuclear ribonucleoprotein K	19	19	27.6883	27.7329	27.7759	27.629	27.5195	27.5374	27.3836	27.5559	27.5111
P55258	Ras-related protein Rab-8A	9	2	24.374	24.1735	24.2504	24.2159	24.1234	24.2689	24.2135	23.6641	24.1314
Q60973	Histone-binding protein RBBP7	3	2	22.1951	22.0873	21.8832	22.1566	21.9973	21.8759	21.876	21.6857	21.8765
Q61187	Tumor susceptibility gene 101 protein	6	6	22.1743	23.0991	22.7137	21.5146	21.5306	23.4434	21.4428	22.8329	22.7523
Q62446	Peptidyl-prolyl cis-trans isomerase FKBP3	10	10	26.576	26.5226	26.7552	26.3714	26.6713	26.5965	26.4858	26.3844	26.2543
Q8BMS1	Trifunctional enzyme subunit alpha, mitochondrial	16	16	25.8739	25.8217	25.9003	26.1316	26.1952	26.112	25.6023	25.6266	25.6394
Q8R409	Protein HEXIM1	1	1	18.6839	18.7035	18.6176	18.418	18.7465	18.6612	18.5646	18.1566	18.5244
Q1XH17	Tripartite motif-containing protein 72	7	7	25.4556	25.2734	25.3766	24.7562	24.8247	25.1475	25.3007	24.8098	25.228
P62852	40S ribosomal protein S25	4	4	25.7463	25.8753	25.9262	25.6783	25.3114	25.5851	25.6782	25.5724	25.5748
Q8BW75	Amine oxidase [flavin-containing] B	16	16	24.8765	24.6976	24.9213	27.0874	26.9627	27.0466	24.8095	24.3941	24.5445
Q8K297	Procollagen galactosyltransferase 1	1	1		18.3527	18.1441	19.4855	19.4912	19.5521	17.9148		18.1012
Q8VI78	Phospholipase A1 member A	7	7	23.3761	23.7922	23.7481	23.0719	23.2301	23.4147	23.3838	23.436	23.4104
Q6PER3	Microtubule-associated protein RP/EB family member 3	8	6	22.8366	22.9952	22.9252	22.4113	22.8434	23.0323	22.9088	22.7431	22.3313
O88738	Baculoviral IAP repeat-containing protein 6	8	8	27.4773	27.3221	27.3811	26.9735	26.8467	27.0522	27.407	26.8832	27.1308
Q8R1B4	Eukaryotic translation initiation factor 3 subunit C	19	19	26.1107	26.0934	26.1934	26.0133	26.1484	26.0914	25.9484	25.7984	25.9331
A2A9H6	Predicted gene 884	6	6	21.8295	22.2197	21.8305	22.6622	22.7955	22.8839	22.0629	20.9963	21.9276
Q9JK53	Prolargin	11	11	24.411	24.1833	25.1474	24.7364	25.266	24.5126	24.4942	24.2638	24.4439
Q3UMF0	Cordon-bleu protein-like 1	9	9	25.6318	25.548	25.5911	24.5228	24.5902	24.7049	25.3841	25.083	25.5547
A0A3B2W864	Predicted gene, 49804	3	3	24.0322	24.3113	23.9917	23.779	23.7905	23.9365	23.8318	24.0241	23.778
Q64378	Peptidyl-prolyl cis-trans isomerase FKBP5	12	12	23.4744	22.9409	22.8373	23.3762	23.5266	23.5354	22.9595	22.779	22.8815
A0A0A6YWR2	Ig gamma-1 chain C region secreted form (Fragment)	7	7	25.1226	25.1586	24.8173	25.2956	25.5233	25.2053	24.896	24.9208	24.5701
A0A3B2W450	U1 small nuclear ribonucleoprotein C	1	1	22.733	22.4304	22.7342	22.6312	23.4809	22.4611	22.3269	22.6681	22.1694
P70404	Isocitrate dehydrogenase [NAD] subunit gamma 1, mitochondrial	4	4	21.8796	22.1846	22.0549	22.7521	22.59	22.7742	21.9397	21.6576	21.8167
Q9DB34	Charged multivesicular body protein 2a	6	6	25.1176	25.1989	25.248	24.5954	24.4267	24.4907	24.9501	24.8824	25.0254
Q3TQP6	Malic enzyme	3	3	18.593	19.0109	18.3111	19.4078	18.8658	18.8655	18.6578	18.1655
Q922H4	Mannose-1-phosphate guanyltransferase alpha	8	8	25.1153	25.092	25.0328	25.3051	25.4163	25.5019	24.8822	24.7401	24.9105
G3X8R0	Receptor expression-enhancing protein	3	3	25.3169		25.3316	25.0215	25.0335	20.1647	25.0826	25.1269	25.0602
P34928	Apolipoprotein C-I	4	4	31.7729	31.7398	31.7358	29.8402	29.7902	29.7684	31.5652	31.4416	31.5402
Q91WP0	Mannan-binding lectin serine protease 2	15	15	26.0553	25.3489	25.334	25.5181	25.4976	25.5339	25.4158	25.269	25.4705
Q99LC5	Electron transfer flavoprotein subunit alpha, mitochondrial	13	13	27.212	27.0886	27.1604	27.5827	27.7116	27.643	26.9774	26.7605	27.0153
H3BJM1	Forkhead box protein P1	4	4	18.3936	18.22	16.3171	18.0181	18.1291	16.6141	18.7461	16.7164	16.1969
Q571C7	Transcription factor TFIIIB component B'' homolog	1	1	20.5977	21.2387	21.0157	21.9205	22.0583	22.3186	20.7425
Q61704	Inter-alpha-trypsin inhibitor heavy chain H3	6	6	24.6386	24.3141	24.6283	24.9576	24.77	24.9951	24.3991	24.2343	24.2693
G5E924	Heterogeneous nuclear ribonucleoprotein L (Fragment)	17	17	26.2737	26.0662	26.2488	25.9194	26.1216	26.0685	26.011	25.8498	26.0354
Q64471	Glutathione S-transferase theta-1	16	16	28.1839	28.233	28.3036	28.5504	28.4531	28.4477	28.0778	27.8909	28.0541
A0A0R4J0B4	CMP-N-acetylneuraminic acid synthase	6	6	22.2093	22.2097	22.2455	22.5709	22.5454	22.7977	22.1107	21.6412	22.1678
P62307	Small nuclear ribonucleoprotein F	5	5	24.6491	24.9329	24.8983	24.3693	24.5081	24.4083	24.6293	24.5884	24.5909
Q3UYU2	tRNA (uracil-5-)-methyltransferase homolog A	1	1	19.8048	19.8029	19.4412	20.2279			19.6569	19.2405
Q811S7	Upstream-binding protein 1	2	2	21.0238	21.1626	20.7931		20.6484	19.9025	20.7273	20.1993	21.2141
Q60790	Ras GTPase-activating protein 3	5	5	26.7818	26.7833	26.6665	25.4214	25.1012	25.0164	26.4367	26.5879	26.5216
Q9R1P4	Proteasome subunit alpha type-1	2	2	21.6398	21.0701	21.5952	21.4626	21.3256	21.6337	21.2651	21.6724	20.5279
Q9CR50	RING finger and CHY zinc finger domain-containing protein 1	1	1		16.4899			16.4942	16.1753	16.2618
P42925	Peroxisomal membrane protein 2	3	3	22.9814	23.3008	23.3181	22.7854	22.8547	23.0629	22.8534	23.0257	23.0536
Q8VEK3	Heterogeneous nuclear ribonucleoprotein U	19	18	28.0104	27.9698	27.9544	28.0909	28.0614	27.9953	27.7634	27.7456	27.7445
Q9JI08	Bridging integrator 3	1	1	17.7286	18.1081	17.9424	18.1824	18.2255	18.234	18.2488	16.8311
Q91X83	S-adenosylmethionine synthase isoform type-1	14	12	28.6677	28.3735	28.676	28.4581	28.5262	28.5226	28.3801	28.4034	28.27
Q9DCE9	Interferon gamma-induced GTPase	6	6	22.8532	23.0595	22.6415	22.4811	22.3449	22.7171	22.6484	22.6978	22.5563
Q9CR51	V-type proton ATPase subunit G 1	2	2	21.5364	21.6342	21.1368	21.1471	21.5261	21.1276	20.8687	21.2755	21.4685
Q8BH43	Wiskott-Aldrich syndrome protein family member 2	5	5	23.185	23.2894	23.2435	23.1623	23.1976	23.2665	22.9301	22.9915	23.1172
P24063	Integrin alpha-L	1	1	27.1379	27.1925	27.1212	26.6952	26.5144	26.5908	27.0458	26.6904	27.0168
S4R225	WD repeat-containing protein 13	1	1	18.9922	18.7769	17.9222	19.0136	18.8342	19.1556	18.1912		18.5969
O54988	STE20-like serine/threonine-protein kinase	12	11	26.1685	26.1896	26.171	25.8207	25.9644	25.9786	25.8579	25.8805	26.1068
O88803	Leukocyte cell-derived chemotaxin-2	3	3	23.0947	23.1489	23.0411	23.0341	23.0246	22.7916	23.0832	22.8321	22.6716
Q9DBK0	Acetyl-coenzyme A thioesterase	9	9	22.3052	21.7966	22.1528	23.8838	23.0741	22.799	21.6492	22.164	21.7702
P27656	Hepatic triacylglycerol lipase	19	19	27.6772	27.8738	27.879	27.2026	27.2793	27.251	27.6443	27.4821	27.643
P46460	Vesicle-fusing ATPase	34	34	27.1402	26.9852	27.077	27.2739	27.3458	27.2389	26.9342	26.6918	26.9054
Q8R0Y6	Cytosolic 10-formyltetrahydrofolate dehydrogenase	29	29	25.8922	25.7879	25.7627	25.3716	25.418	25.297	25.6922	25.4868	25.5966
Q8VDV3	Guanine nucleotide exchange factor for Rab-3A	1	1	21.6928	20.928	21.7511	21.7706	22.1313	21.9566	21.481	21.2034	21.1381
A0A2I3BQV5	Exportin-7	23	23	25.9536	25.8811	25.9623	26.0383	25.9611	26.0078	25.6596	25.728	25.7499
Q8C605	ATP-dependent 6-phosphofructokinase	12	10	22.8069	23.0471	23.0197	23.6664	23.6615	23.6839	22.7444	22.4252	22.9998
Q8BH64	EH domain-containing protein 2	20	18	27.1372	27.069	27.1455	26.9643	26.7671	26.7458	26.7648	27.1931	26.6824
P51859	Hepatoma-derived growth factor	12	11	27.09	27.1128	27.11	27.1417	27.0874	27.1173	26.9736	26.7811	26.8939
Q9WUB4	Dynactin subunit 6	2	2	20.3864	19.8161	19.5508	19.9334	19.7297	19.9499	19.4782	20.3759	19.0437
Q80YC5	Coagulation factor XII	16	16	30.3799	30.3836	30.5633	30.3022	30.5488	30.3709	30.2247	30.2829	30.1726
A0A0B4J1E5	Uridine/cytidine kinase (Fragment)	1	1	19.3299		19.8007	19.8887			19.3672
Q6Y685	Transforming acidic coiled-coil-containing protein 1	1	1	17.4184	17.3475	17.3167	17.8015	17.8325	17.7815	17.4996	16.7826	17.0591
A0A0A0MQF5	Ubiquitinyl hydrolase 1	4	4	22.548	22.7467	22.3599	22.6275	22.4007	22.4179	22.4536	22.0035	22.5204
E9QNL5	Sulfotransferase	19	18	28.8864	28.8657	28.9492	28.7437	28.786	28.8018	28.6465	28.7498	28.654
Q9R1T2	SUMO-activating enzyme subunit 1	10	10	24.8153	24.8789	25.3073	25.5044	25.3656	25.1522	24.7446	24.9017	24.7521
E9QNG6	Sorting nexin-13	1	1	21.5895	21.8122	21.0808	21.2581	21.0559	20.8905	21.553	21.6327	20.4858
Q8BPB0	MOB kinase activator 1B	4	4	23.476	23.5741	23.7971	23.8992	23.8773	23.8738	23.3523	23.4204	23.4454
Q9JIK5	Nucleolar RNA helicase 2	8	8	26.9455	27.2994	27.014	27.049	26.9575	26.7918	26.8942	26.955	26.7842
P70372	ELAV-like protein 1	9	9	23.8658	23.4779	23.3277	23.6506	23.6625	23.8541	23.3157	23.325	23.4376
P01756	Ig heavy chain V region MOPC 104E	2	2	22.6269	22.3902	22.4367	22.1463	22.2829	22.1844	22.2306	22.4053	22.1756
Q78PY7	Staphylococcal nuclease domain-containing protein 1	46	46	29.1889	28.997	29.1067	29.0074	28.9511	29.0019	28.9174	28.9497	28.7857
Q61171	Peroxiredoxin-2	6	6	25.7983	25.7791	25.7631	25.8195	25.7504	25.698	25.5641	25.6259	25.5125
Q8R3V5	Endophilin-B2	7	7	21.6524	21.8139	21.7825	22.3416	21.8818	21.6803	21.731	21.8424	20.8633
Q9CWK8	Sorting nexin-2	22	20	27.2775	27.1441	27.2363	26.9971	27.1148	27.0701	27.0679	26.9945	26.9636
Q9QZZ4	Unconventional myosin-XV	1	1	23.0124	23.1006	23.1075	21.8661	21.745	21.9947	23.0562	22.6962	22.8155
Q9QXB9	Developmentally-regulated GTP-binding protein 2	8	7	21.6339	21.5524	21.9311	21.8038	21.75	21.5927	21.5528	21.4032	21.5535
P86792	C-C motif chemokine 21b	1	1	16.9927	16.7454	17.0128	16.5736	15.8947	17.2438	16.9037	16.1112	16.9735
P11680	Properdin	8	8	24.6555	24.8774	24.6742	24.6617	24.6806	24.6921	24.4075	24.5667	24.6096
Q9ER72	Cysteine--tRNA ligase, cytoplasmic	28	28	26.8135	26.8483	26.9953	26.9123	26.7878	26.8641	26.6055	26.7379	26.6926
Q9CZD3	Glycine--tRNA ligase	16	16	26.5323	26.9895	26.3494	26.4896	26.4233	26.3417	26.4281	26.5233	26.3696
Q99P87	Resistin	4	4	25.0626	25.2393	25.1392	25.0307	25.0444	24.9071	24.7192	25.2195	24.8383
Q06890	Clusterin	15	15	28.7479	28.7542	28.7145	28.8319	28.8605	28.9187	28.5433	28.4938	28.5584
Q6P1G0	HEAT repeat-containing protein 6	2	2	21.0652	20.3831	20.3931	20.7893	20.7808	20.6298	20.869	19.9752	20.3476
Q9CQ49	Nuclear cap-binding protein subunit 2	1	1	19.3736	19.6997	19.7525	19.9001	19.7872	19.9987	19.6438	19.1313	19.4168
P01027	Complement C3	110	110	33.2263	33.1622	33.2348	33.1018	33.1173	33.1054	33.0264	32.945	33.0362
P63101	14-3-3 protein zeta/delta	4	2	20.4438	20.523	19.8117	19.8007	20.3191	20.4897	19.1635	20.4627	20.3227
Q9CR57	60S ribosomal protein L14	4	4	25.8773	25.8328	25.754	26.27	26.1545	26.3019	25.6042	25.5471	25.698
Q9Z1D1	Eukaryotic translation initiation factor 3 subunit G	7	7	25.3261	25.5543	25.6413	25.3184	25.5449	25.382	25.2879	25.5432	25.0548
Q8WUR0	Protein C19orf12 homolog	5	5	24.8565	24.5266	24.1429	24.6712	24.2134	24.2185	24.4649	24.2619	24.2692
P07724	Albumin	28	28	30.5881	30.4938	30.4688	30.1844	30.2525	30.1623	30.3429	30.294	30.3085
P09405	Nucleolin	16	16	28.7754	28.6799	28.8236	28.7595	28.8281	28.7555	28.5932	28.5049	28.5761
O54819	Tissue factor pathway inhibitor	3	3	20.4232	20.5062	20.6504				20.4206	20.2165	20.3397
Q8R007	Nectin-4	1	1	20.2596	20.4789	19.9729	20.4498	19.6968	20.3394	20.0523
P49586	Choline-phosphate cytidylyltransferase A	13	13	25.084	24.8651	24.7816	25.024	25.0528	25.1466	24.5994	24.6457	24.8888
Q99JW4	LIM and senescent cell antigen-like-containing domain protein 1	13	11	27.6734	27.6613	27.6393	26.9583	26.8527	27.09	27.4291	27.452	27.4964
Q8K274	Ketosamine-3-kinase	7	7	24.8226	24.1912	24.5697	24.643	24.4922	24.632	24.427	24.3386	24.2892
P60122	RuvB-like 1	5	5	24.0104	23.8444	24.1315	23.6694	23.5195	23.392	23.8997	23.8188	23.6809
E9Q8B5	Complement factor H-related 4	41	38	30.2355	30.2757	30.2458	29.9537	29.9823	30.001	30.0492	30.0406	30.0765
Q921I1	Serotransferrin	35	35	27.6295	27.547	27.5242	27.0453	27.0858	27.2037	27.3916	27.3239	27.3961
Q60960	Importin subunit alpha-5	6	6	22.6026	22.1403	22.3557	21.675	21.531	21.7376	22.5899	21.804	22.0359
Q00612	Glucose-6-phosphate 1-dehydrogenase X	16	16	25.9991	25.9041	25.5536	26.2933	26.2815	26.4256	25.7073	25.3484	25.8112
P54823	Probable ATP-dependent RNA helicase DDX6	11	11	23.7252	23.5956	23.7806	23.8926	23.364	23.4473	23.6898	23.6294	23.1432
Q9JJ28	Protein flightless-1 homolog	8	8	22.6822	22.9549	22.3255	22.3775	22.8482	22.1293	22.7378	21.9301	22.6498
Q8VBT9	Tether containing UBX domain for GLUT4	7	7	22.9649	23.1415	22.7263	22.8174	23.0723	22.9181	22.6495	22.7129	22.9027
Q9CQ19	Myosin regulatory light polypeptide 9	6	3	23.4075	23.2679	23.3975	22.821	22.8136	22.9489	22.9288	22.8331	23.6045
D3Z3G6	Mitogen-activated protein kinase	6	4	22.346	22.2655	22.0435	22.2098	22.4255	22.1257	21.9494	22.2373	21.8786
Q9QUR7	Peptidyl-prolyl cis-trans isomerase NIMA-interacting 1	3	3	23.4886	23.1194	23.3327	22.6047	22.1499	22.4028	23.3714	22.8592	23.1092
P32261	Antithrombin-III	15	15	29.0444	29.186	28.883	28.4218	28.5571	28.4618	29.0715	28.5513	28.8812
P60229	Eukaryotic translation initiation factor 3 subunit E	20	20	26.2521	26.224	26.2839	26.0472	26.0809	25.9416	26.1151	25.8863	26.1669
A0A2I3BR29	Protein FAM107B	4	4	21.3211	21.7738	21.0075	21.9258	21.8125	21.8593	21.4777	21.3567	20.6718
Q91VH2	Sorting nexin-9	13	13	23.9736	23.2552	24.1447	23.4572	22.6927	23.4416	23.667	23.4684	23.7918
Q61749	Translation initiation factor eIF-2B subunit delta	3	3	21.5736	21.3487	19.6295	21.6054	21.4819	21.4687	21.2068	20.295	20.986
Q924A2	Protein capicua homolog	1	1	15.8794	15.8352		15.9834	15.6079	15.714	15.6666
P35550	rRNA 2'-O-methyltransferase fibrillarin	5	5	23.7066	23.443	23.7683	23.6718	23.7086	23.4692	23.7103	23.472	23.1258
Q8K310	Matrin-3	8	8	23.2698	23.4291	23.4925	22.98	23.2507	23.1308	23.1201	23.25	23.2562
Q9Z2U0	Proteasome subunit alpha type-7	7	7	23.6476	23.4703	23.6027	23.4855	23.5129	23.4412	23.5798	23.146	23.3993
Q8R010	Aminoacyl tRNA synthase complex-interacting multifunctional protein 2	5	5	24.4851	24.3612	24.4439	23.9907	23.9565	23.9973	24.3985	23.9817	24.3179
P60867	40S ribosomal protein S20	5	5	25.9506	26.5694	26.4015	26.0696	26.5643	26.1895	26.1376	26.0425	26.2418
Q9CWZ7	Gamma-soluble NSF attachment protein	5	5	23.6177	23.348	22.9751	22.1632	22.7017	21.7454	23.0055	23.1219	23.3094
Q9CRB6	Tubulin polymerization-promoting protein family member 3	10	10	28.0506	27.9982	28.0119	27.9995	28.0663	28.0074	27.9174	27.7299	27.8501
Q9ES00	Ubiquitin conjugation factor E4 B	8	8	20.2371	18.9807	18.6051	20.757	18.9189	19.5002	20.1355	17.9693	18.883
Q91VY9	Zinc finger protein 622	4	4	23.8973	24.0419	24.2725	22.6446	23.7857	23.167	23.7224	23.3683	24.3965
Q148V7	RAB11-binding protein RELCH	5	5	22.5179	22.1535	22.1841	22.1454	22.327	22.3568	22.4049	21.7954	22.0631
Q8JZS0	Protein lin-7 homolog A	4	4	19.6119	18.7719	19.8541	19.8814	19.1307	20.0637	20.2223	18.9102	17.7208
P35441	Thrombospondin-1	62	62	31.7821	31.6795	31.6414	30.5925	30.5835	30.6043	31.5939	31.4306	31.5245
Q9R008	Mevalonate kinase	3	3	18.1907	17.9997	17.4851	18.3284	18.2183	18.2405	18.0189		17.3873
Q06138	Calcium-binding protein 39	13	9	27.1405	26.9411	27.1563	27.1142	27.0641	27.1388	26.9111	27.0047	26.7712
Q8VIJ6	Splicing factor, proline- and glutamine-rich	20	19	26.4479	26.3811	26.3302	26.2614	26.2939	26.2871	26.3791	25.9299	26.266
Q9Z121	C-C motif chemokine 8	3	3	23.9611	23.9869	24.1351	24.0728	24.1138	23.9803	23.9305	23.9557	23.6343
Q9CQW2	ADP-ribosylation factor-like protein 8B	6	6	23.0666	23.4797	23.1479	23.3732	23.7012	23.5728	22.9011	23.2277	23.0335
Q3ULW8	Protein mono-ADP-ribosyltransferase PARP3	11	11	24.2713	24.4101	24.3526	24.5434	24.4933	24.4801	24.2408	24.0835	24.1622
P56959	RNA-binding protein FUS	5	3	25.9195	26.2261	26.1555	25.5851	25.6476	25.8622	25.7685	26.0229	25.9686
P30681	High mobility group protein B2	7	5	28.2964	28.477	28.5247	28.9126	28.0751	28.2924	28.2601	28.1506	28.3472
A2AGS0	E3 ubiquitin-protein ligase TRIM32 (Fragment)	1	1	15.7547	15.7573	15.2	16.7563	16.1367	16.3683	15.4135
Q91XD2	LIM and senescent cell antigen-like-containing domain protein 2	6	4	24.9013	25.1308	25.0182	21.0355	24.8781		24.8433	24.8817	24.796
P84099	60S ribosomal protein L19	6	6	23.6589	23.6325	23.3366	23.7305	23.6229	23.8783	23.5239	23.1223	23.4404
Q8CGC7	Bifunctional glutamate/proline--tRNA ligase	56	56	28.7611	28.6722	28.8169	28.7617	28.8112	28.91	28.575	28.6061	28.5406
Q3TLD5	Unconventional prefoldin RPB5 interactor	1	1	16.1534	15.98	16.1615	16.1357	16.1327	16.6319	15.9619		15.8864
Q8CG46	Structural maintenance of chromosomes protein 5	2	2	26.5198	26.3444	24.9646	26.489	26.0655	24.4279	26.4142	26.0245	24.9282
Q9ERK4	Exportin-2	32	32	28.1208	27.9925	28.0157	27.582	27.5343	27.5749	27.9347	27.9042	27.7616
A0A0N4SVS6	Cellular nucleic acid-binding protein	5	3	25.5342	24.984	25.0377	24.9665	24.826	25.3076	25.2155	24.6	25.1999
Q99MR6	Serrate RNA effector molecule homolog	14	14	24.7271	24.6952	24.6418	24.5885	24.8211	24.7277	24.5554	24.3457	24.6247
A0A2R8VHF9	Myosin-11	32	17	22.4652	22.2371	22.4491	23.3961	23.5758	23.4429	22.4806	21.682	22.3548
L7N451	Interferon-induced very large GTPase 1	2	2	20.2556	20.026	20.1606	20.2877	20.1851	20.2495	20.0479	19.8548	20.0192
Q99PG2	Opioid growth factor receptor	2	2	19.822	19.9148	19.846	20.4205	20.5779	20.3793	19.9533	19.6952	19.3543
Q99LU0	Charged multivesicular body protein 1b-1	4	2	27.7375	27.5282	27.5599	26.6696	26.6266	27.0485	27.6481	27.1458	27.479
Q9JMC3	DnaJ homolog subfamily A member 4	7	7	24.9125	24.957	25.0683	25.0015	25.126	25.1274	24.8356	24.6883	24.8936
Q9D9V3	Ethylmalonyl-CoA decarboxylase	4	4	19.4162	19.5035	20.704	19.3803	20.4292		19.9675	19.9299	19.5595
Q6P9R2	Serine/threonine-protein kinase OSR1	14	11	25.7394	25.8337	25.8394	25.8807	25.9163	25.9112	25.7263	25.5073	25.6567
Q2TPA8	Hydroxysteroid dehydrogenase-like protein 2	8	8	25.3511	25.1676	25.3808	25.3715	25.3346	25.3812	25.1667	25.2381	24.9776
Q8BIJ7	RUN and FYVE domain-containing protein 1	6	6	23.3072	23.4385	23.3138	23.3621	23.3331	23.5147	23.1676	23.113	23.2649
P50171	(3R)-3-hydroxyacyl-CoA dehydrogenase	5	5	22.1291	22.325	22.0365	22.7438	23.0985	23.7101	22.0142	21.932	22.0439
Q9CQC6	Basic leucine zipper and W2 domain-containing protein 1	14	13	26.9072	26.8498	26.834	26.8856	26.8206	26.8384	26.8229	26.6697	26.5774
Q8BWB1	Synaptopodin 2-like protein	1	1	20.0072	19.9779	20.1525	20.4077		19.4211	19.9145	19.645	20.0473
Q8BP47	Asparagine--tRNA ligase, cytoplasmic	18	18	27.6876	27.6468	27.8528	27.661	27.6996	27.6581	27.7015	27.4996	27.4768
Q91X52	L-xylulose reductase	5	5	23.5826	23.7019	23.6949	24.1602	23.9108	24.0574	23.5846	23.236	23.6249
Q8VHL0	Urea transporter 1	4	4	21.63	22.0888	21.8344	23.045	22.6953	22.1488	21.1703	22.241	21.4507
Q64152	Transcription factor BTF3	3	3	24.3596	24.1818	24.7794	24.4127	24.6946	24.664	24.3972	24.1189	24.353
P40936	Indolethylamine N-methyltransferase	5	5	22.2763	22.1143	22.1379		21.4936	21.3224	22.122	21.7723	22.1109
Q8QZY2	Glycerate kinase	9	9	23.8865	23.7969	23.8574	23.8664	23.8065	23.7227	23.6021	23.8268	23.601
Q9JIA7	Sphingosine kinase 2	2	2	18.4691	18.3599		20.095	19.9139	19.5544		18.2141	18.2833
G3UZZ3	Dynamin GTPase (Fragment)	23	1	18.7444	19.346	19.0089	18.9842	18.8542	18.7806	18.9351	18.7148	18.9984
P42208	Septin-2	16	16	27.5314	26.8529	27.4898	26.5937	26.7604	27.2291	27.3262	27.1781	26.9397
B9EJ22	Mismatch repair endonuclease PMS2	2	2	25.1023	24.9929	25.3936	24.3478	24.5933	24.8149	24.7227	25.1569	25.1034
P34022	Ran-specific GTPase-activating protein	7	7	25.1426	24.6049	24.9696	24.7423	24.9083	24.8305	24.7744	24.7961	24.6985
Q62000	Mimecan	6	6	21.4491	21.624	21.4442	21.7212	21.6598	21.3561	21.6843	20.7244	21.4553
P50295	Arylamine N-acetyltransferase 2	2	2	21.6202	21.2847	21.8666	21.0983	21.017	21.0072	21.7132	21.0792	21.4722
Q8R0F6	Integrin-linked kinase-associated serine/threonine phosphatase 2C	4	4	20.9212	20.7968	20.4665	20.6234	19.9629	20.8806	20.9063	20.2147	20.5253
Q6NZJ6	Eukaryotic translation initiation factor 4 gamma 1	38	35	25.7846	25.9233	25.7448	25.7542	25.9806	25.9744	25.6324	25.6376	25.696
Q9D358	Low molecular weight phosphotyrosine protein phosphatase	4	4	24.0137	23.706	23.9149	24.3012	24.1699	24.3056	23.848	23.7226	23.5775
P62960	Y-box-binding protein 1	7	5	24.6621	24.4342	24.4393	24.1982	24.4005	24.228	24.348	24.3469	24.3625
Q6P8X1	Sorting nexin-6	11	11	27.1068	27.3603	27.0346	26.5818	26.4941	26.3017	27.0639	27.0741	26.8872
Q921X9	Protein disulfide-isomerase A5	14	14	23.6768	23.5578	23.751	24.6151	24.5636	24.6266	23.7292	23.4051	23.3431
Q9D0R2	Threonine--tRNA ligase 1, cytoplasmic	27	26	27.6523	27.5143	27.6853	27.4715	27.5226	27.5096	27.4743	27.3929	27.5038
Q9D379	Epoxide hydrolase 1	24	24	26.3956	26.3004	26.3611	27.169	27.0697	27.1547	26.3137	25.9082	26.3164
Q61425	Hydroxyacyl-coenzyme A dehydrogenase, mitochondrial	11	11	25.3239	25.3064	25.1822	25.8207	25.9522	25.752	25.0439	25.3949	24.8423
Q99JZ4	GTP-binding protein SAR1a	4	2	24.0564	23.8651	23.9422	23.9431	23.934	24.1695	23.8668	23.5938	23.9109
E9PWG4	Myosin light chain 1/3, skeletal muscle isoform	8	1	21.3929	21.3307	21.5079	21.3418	21.5981	21.2794	21.3229	21.242	21.1926
Q6NVF9	Cleavage and polyadenylation specificity factor subunit 6	6	6	22.1597	21.7326	22.3474	22.2056	22.6285	22.3056	21.7293	22.1098	21.966
Q91VH6	Protein MEMO1	7	7	23.3397	23.3987	23.191	23.8208	24.0905	24.1258	23.6132	23.0365	22.6463
Q9R182	Angiopoietin-related protein 3	12	12	24.9997	24.9907	24.8461	24.6184	24.6091	24.5964	24.698	24.7378	24.9225
Q9Z1Q5	Chloride intracellular channel protein 1	4	4	23.0377	23.2899	23.1192	23.1598	23.2491	23.1999	22.8388	23.1208	23.0139
Q9DB77	Cytochrome b-c1 complex subunit 2, mitochondrial	7	7	23.5807	23.3749	23.8026	24.5024	23.6655	24.2056	23.7712	23.2328	23.2483
Q8VCC1	15-hydroxyprostaglandin dehydrogenase [NAD(+)]	8	8	25.1178	25.445	25.3999	25.8485	25.8751	25.9088	24.9463	25.2252	25.3222
Q91Z50	Flap endonuclease 1	2	2	21.1638	21.1549	20.7509	21.4268	21.5754	21.5711	21.1506	20.4699	20.9408
Q80XN0	D-beta-hydroxybutyrate dehydrogenase, mitochondrial	11	11	23.4724	23.6044	23.3221	24.2435	24.1286	24.1613	23.1775	23.4493	23.3113
Q9D0E1	Heterogeneous nuclear ribonucleoprotein M	22	22	29.9493	29.777	30.0708	29.9256	30.0199	29.883	29.9319	29.4624	29.9093
Q9CXW4	60S ribosomal protein L11	8	8	23.819	23.7161	23.8547	23.892	23.6709	23.6919	23.6618	23.625	23.6451
G3X952	Zinc finger with KRAB and SCAN domains 2	1	1	22.2187	22.397	22.3122	22.34	22.1939	22.1932	22.2588	22.0971	22.1113
Q6ZWQ9	Myosin, light chain 12A, regulatory, non-sarcomeric	6	3	27.0649	26.2241	26.1459	26.8391	26.0693	26.1788	26.4798	26.0792	26.5618
E9Q414	Apolipoprotein B-100	239	239	34.0789	33.9887	34.0367	33.6185	33.6449	33.6266	33.8851	33.8818	33.88
P97379	Ras GTPase-activating protein-binding protein 2	9	9	24.2541	24.1888	24.4371	24.2189	24.2655	24.3884	24.1348	24.1783	24.1193
P45952	Medium-chain specific acyl-CoA dehydrogenase, mitochondrial	13	13	25.4353	25.1108	25.0858	25.7515	25.7445	25.9313	25.0776	25.1409	24.9864
Q69ZS7	HBS1-like protein	15	15	23.0117	22.6406	23.4236	23.0676	22.8199	22.8123	22.9703	22.9465	22.8108
P80317	T-complex protein 1 subunit zeta	18	18	26.3862	26.6368	26.63	26.649	26.7495	26.5393	26.4463	26.3017	26.4645
B1AQF4	Dual specificity protein phosphatase	2	2	26.1091	25.9565	25.7693	26.1169	25.9942	25.8643	25.9202	25.8691	25.6039
P62849	40S ribosomal protein S24	3	3	23.7035	23.8867	23.7518	23.9029	24.2632	23.8629	23.6477	23.7201	23.5331
Q8CIB5	Fermitin family homolog 2	25	25	26.2387	26.3751	26.1619	26.1893	26.1885	26.2752	26.2092	25.8214	26.2731
P17563	Methanethiol oxidase	16	16	26.4398	26.3018	26.3783	26.7476	26.6727	26.6363	26.1388	26.3141	26.225
Q920V1	UDP-GalNAc:beta-1,3-N-acetylgalactosaminyltransferase 1	1	1	20.6007	21.4282	21.6932	21.3591	21.2843	21.3582	21.0882	21.2419	21.1578
Q6ZWN5	40S ribosomal protein S9	9	9	24.9455	24.34	25.2043	25.2803	24.9309	24.8261	24.6333	24.6108	24.9158
P01942	Hemoglobin subunit alpha	17	17	35.0518	35.0783	35.2129	35.4007	35.347	35.4299	34.9197	35.0415	34.9466
A0A0R4J038	Bradykinin	30	26	31.9631	31.8402	31.8906	31.2652	31.3712	31.3207	31.7496	31.7098	31.7986
P16460	Argininosuccinate synthase	27	27	31.9423	31.826	31.8713	31.8549	31.8277	31.8154	31.8285	31.6293	31.7402
D3YVZ5	Tubulin polyglutamylase TTLL5	1	1	20.6769	20.2438	20.7445	21.1645	20.77	21.2296	19.8825	20.5605	20.7082
Q7TMK9	Heterogeneous nuclear ribonucleoprotein Q	21	14	27.4585	27.3334	27.4997	27.3185	27.3675	27.3829	27.2886	27.2708	27.3027
Q02257	Junction plakoglobin	2	2	21.44	21.8572	21.3866	21.609	22.2044	19.8838	19.7524	21.8421	21.8762
Q9QVP9	Protein-tyrosine kinase 2-beta	2	2	22.2402	22.2247	21.9054	22.2961	22.1798	22.2492	22.0197	21.8143	22.1115
A0A0B4J1E2	SNW domain-containing protein 1	2	2	15.9545	15.8742	15.83	16.1055	15.9935	15.8999	15.9712		15.4716
P17427	AP-2 complex subunit alpha-2	23	20	27.19	26.8727	27.0112	26.8107	26.9394	26.7598	26.9672	26.7312	26.9494
P40240	CD9 antigen	2	2	24.4692	24.1342	24.2502	23.7783	23.8003	23.7268	24.1963	24.3158	23.9029
Q60674	Nuclear receptor subfamily 1 group D member 2	1	1	23.7459	22.7006	22.8444	23.7765	23.7718	23.7418		23.0331
Q6NZB0	DnaJ homolog subfamily C member 8	5	5	22.0661	23.8141	22.1268	22.5714	22.7339	22.7603	22.8703	22.538	22.8855
E9Q918	Multiple epidermal growth factor-like domains protein 11	1	1	21.0085	21.5799	21.4091	20.2286	19.558	19.014	21.4787	20.6395	21.3787
S4R1U9	Selenoprotein O	1	1	15.3568	15.7948	15.2617	16.3771	16.3829	16.2593	16.1486	14.2444	15.0193
Q8VDF3	Death-associated protein kinase 2	1	1	17.0215	17.193	17.0946	17.6323	17.1343	17.4641	17.6673	16.0744	16.6991
P63038	60 kDa heat shock protein, mitochondrial	25	25	27.3277	27.2602	27.3382	27.9473	27.8627	27.9609	27.2324	27.1253	27.1482
Q91UZ5	Inositol monophosphatase 2	1	1	19.5358	19.6161	19.0998	19.156	19.5325	19.0341	19.3109	19.2652	19.3076
P59016	Vacuolar protein sorting-associated protein 33B	1	1		19.1397	19.0229	19.4124	19.5598		19.2131	18.5678	18.9774
A0A140LHA2	Mitotic checkpoint protein BUB3	7	7	25.4943	25.5448	25.5555	25.7769	25.8395	25.7406	25.2773	25.3598	25.5296
Q00623	Apolipoprotein A-I	33	33	35.1118	35.1728	35.0696	34.2927	34.2525	34.188	35.0256	34.9604	34.9525
Q9JJN5	Carboxypeptidase N catalytic chain	8	8	26.6756	26.5117	26.5976	26.4027	26.3057	26.3785	26.5221	26.4096	26.4402
P67778	Prohibitin	5	5	24.667	24.6968	24.5796	24.8531	24.9662	24.973	24.4942	24.4752	24.561
Q9CQJ6	Density-regulated protein	7	7	24.8264	25.0103	24.9363	24.8475	24.9963	25.0939	24.8107	24.7669	24.7886
Q9CQD1	Ras-related protein Rab-5A	5	2	22.6674	23.065	22.9344	22.9135	22.9615	22.8632	23.0677	22.5011	22.6531
O09173	Homogentisate 1,2-dioxygenase	6	6	22.514	22.801	22.9645	22.7126	22.9948	23.2791	22.4348	22.8939	22.5336
O08538	Angiopoietin-1	10	10	25.0525	24.9654	25.2036	24.2909	24.3092	24.3264	24.8537	25.0307	24.9314
Q61543	Golgi apparatus protein 1	7	7	20.3243	20.7172	20.8346	21.0693	21.403	21.4347	20.9283	20.0377	20.4087
P97333	Neuropilin-1	8	8	25.5022	25.7335	25.6106	25.3245	25.5589	25.6458	25.3504	25.5157	25.5721
P01645	Ig kappa chain V-V region HP 93G7	5	3	26.627	26.3337	26.6239	26.6862	26.8333	26.8288	26.4688	26.2691	26.4504
Q9D1R9	60S ribosomal protein L34	2	2	21.0769	21.4245	21.2218	22.1546	21.9591	22.2495	21.0872	21.0801	21.169
P62908	40S ribosomal protein S3	22	22	27.6996	27.6141	27.5786	27.6501	27.6938	27.7222	27.5162	27.457	27.5167
P07309	Transthyretin	5	5	26.9097	26.9276	26.9418	26.8745	26.9661	26.9237	26.7935	26.6125	26.9517
Q80WQ2	Protein VAC14 homolog	11	11	23.0377	23.7139	23.4484	23.6921	24.0322	23.7505	23.2245	23.2244	23.4195
S4R1W8	Glyceraldehyde-3-phosphate dehydrogenase (Fragment)	3	1	21.1904	21.4903	21.2547	22.2383	22.1469	22.2383	21.3538	21.1342	21.0458
Q920M5	Coronin-6	4	3	18.3974	18.2255	17.7593	18.5641	18.1721	17.698	17.8016		18.2067
Q99KB8	Hydroxyacylglutathione hydrolase, mitochondrial	10	10	26.8076	26.9403	26.908	26.8897	26.9317	26.927	26.7621	26.5884	26.8926
P70398	Probable ubiquitin carboxyl-terminal hydrolase FAF-X	35	35	24.9915	25.1293	25.0373	25.617	25.4501	25.4067	24.8856	24.7866	25.0746
Q9DB20	ATP synthase subunit O, mitochondrial	4	3	20.8615	20.2492	20.2913	21.8418	20.7784	21.0857	20.6716	18.8279	20.8661
Q8QZY1	Eukaryotic translation initiation factor 3 subunit L	19	19	25.7712	25.7267	25.6069	25.0296	24.776	25.1504	25.6949	25.2343	25.7334
Q9JLT4	Thioredoxin reductase 2, mitochondrial	6	5		19.0294	19.1589	19.7898	19.9133	19.7711	19.3927	18.7394	18.6436
A8Y5N8	Pleckstrin homology domain-containing family F member 2 (Fragment)	9	9	23.369	22.8805	23.759	23.702	23.6249	23.597	23.0864	23.4628	23.1746
Q6P5E6	ADP-ribosylation factor-binding protein GGA2	1	1	19.6344	19.1503	19.5214	19.9205	19.3428	19.322		19.1896	19.4404
A0A087WNZ7	E3 ubiquitin-protein ligase TRIP12	1	1	24.6832	24.7618	24.6047	24.6469	24.6805	24.5962	24.6174	24.3246	24.7009
Q62419	Endophilin-A2	7	7	23.1001	22.3112	23.0441	23.0988	22.8503	23.1531	22.6825	22.6804	22.8292
P13707	Glycerol-3-phosphate dehydrogenase [NAD(+)], cytoplasmic	16	16	28.427	28.388	28.4573	28.8123	28.6686	28.5837	28.2884	28.3358	28.2648
P70236	Dual specificity mitogen-activated protein kinase kinase 6	6	6	22.4694	22.3656	22.5476	23.273	23.2616	23.5759	22.5253	22.2998	22.1577
P62254	Ubiquitin-conjugating enzyme E2 G1	1	1	19.0923	20.0248	19.855					19.5748	19.5952
A0A0G2JES7	Kinesin-like protein KIF9 (Fragment)	1	1	21.0167	20.4639	21.0001	21.3548	21.5275	21.584	20.5626	20.7533	20.8399
Q8CBE3	WD repeat-containing protein 37	5	5	21.6122	20.8223	20.6968	21.9196	21.9674	21.4048	20.5352	21.0992	21.2137
P01898	H-2 class I histocompatibility antigen, Q10 alpha chain	6	3	20.7927	20.8109	20.9379	20.9358	20.9566	20.9341	20.7019	20.5804	20.8749
Q9Z180	SET-binding protein	1	1	23.4061	23.5186	23.3234	20.7366	21.4057	21.7081	23.1191	23.1807	23.5445
Q8CIN4	Serine/threonine-protein kinase PAK 2	19	19	26.3266	26.4791	26.3983	26.348	26.2609	26.2668	26.322	26.2525	26.2604
O09049	Regenerating islet-derived protein 3-gamma	3	3	20.7708	20.3762	20.5243		20.9106	20.4988	20.6579		20.1894
Q78HU3	Multivesicular body subunit 12A	4	4	30.1657	30.1328	30.0086	30.0077	30.0522	30.007	30.152	29.767	29.9962
E9QPB2	Suprabasin	14	3	23.7613	23.8318	23.5088	24.2207	24.4151	24.4517	23.8372	23.1552	23.674
Q8BJW6	Eukaryotic translation initiation factor 2A	17	17	25.0169	25.2308	25.5137	24.5102	24.5695	25.0177	24.8252	25.0036	25.5148
P35505	Fumarylacetoacetase	1	1	18.8554	19.5796	19.5055	19.216	19.6999			18.5215	19.6973
P51491	Short-wave-sensitive opsin 1	1	1	20.3374	20.0449	20.6785						20.2551
Q8BIQ5	Cleavage stimulation factor subunit 2	3	3	19.68	19.513	19.7956	19.5492	19.5888	19.8255	19.4892	19.2191	19.8576
P48962	ADP/ATP translocase 1	12	8	25.4147	25.2812	25.0292	25.4288	25.2499	25.5623	25.1392	24.9978	25.2393
Q8CFZ6	C-type lectin domain family 3, member b	8	8	29.6096	29.5352	29.5792	29.3177	29.264	29.4081	29.2797	29.5609	29.5056
E0CXB5	Pituitary tumor-transforming gene 1 protein-interacting protein (Fragment)	1	1		19.5682		19.11	19.0773			19.4479
Q07079	Insulin-like growth factor-binding protein 5	10	10	27.0248	27.0425	26.8965	27.0528	26.8368	27.1045	26.9241	26.8253	26.857
Q8VCC9	Spondin-1	6	6	23.0068	22.7849	22.8474	23.4936	23.3385	23.6898	22.2679	22.9973	22.9203
Q5M6W3	Clathrin heavy chain linker domain-containing protein 1	2	2	27.8381	27.5806	27.6876	26.599	26.6254	26.5097	27.6662	27.6027	27.4874
Q8JZZ0	UDP-glucuronosyltransferase 3A2	5	5	21.6089	21.4677	21.7158	23.5634	23.8893	22.8328	21.2514	21.4583	21.7021
P62315	Small nuclear ribonucleoprotein Sm D1	2	2	21.4202	21.5419	21.4088	21.2878	22.1196	21.8834	21.4908	20.8692	21.5636
Q9CZU6	Citrate synthase, mitochondrial	5	5	22.1475	22.1927	21.7745	21.2053	21.0579	21.3243	21.8753	21.6573	22.208
P23116	Eukaryotic translation initiation factor 3 subunit A	58	58	29.0405	29.0253	29.016	29.2251	29.131	29.1737	29.0103	28.7586	28.9457
Q501J6	Probable ATP-dependent RNA helicase DDX17	17	9	24.1612	24.1529	24.0608	24.2362	24.0758	23.9976	24.2312	23.5714	24.1384
Q9DCT8	Cysteine-rich protein 2	11	11	28.0636	27.9512	28.1012	27.85	27.8429	27.9362	27.9581	27.8713	27.9383
P70694	Estradiol 17 beta-dehydrogenase 5	28	14	30.6733	30.7152	30.6033	30.53	30.6257	30.5906	30.5421	30.4285	30.6683
Q9DAC2	Complement component C8 gamma chain	6	6	24.3737	23.6392	24.4329	24.6523	24.3134	24.4069	23.9326	24.3257	23.9338
Q8CE80	Calpain inhibitor	21	12	26.1083	25.5517	25.9621	25.4767	25.6717	25.7489	25.6191	25.8523	25.8514
Q01730	Ras suppressor protein 1	7	7	25.6123	25.559	25.3154	25.4766	25.5015	25.5769	25.4999	25.2997	25.3537
P70274	Selenoprotein P	10	10	29.2342	29.1497	29.3066	29.4104	29.2883	29.258	29.2042	29.0474	29.096
P60840	Alpha-endosulfine	2	1	21.2452	21.5082	21.3997	21.3349	21.2971	21.0663	21.3448	21.158	21.3138
Q91Z67	SLIT-ROBO Rho GTPase-activating protein 2	7	7	24.5435	25.167	24.9649	25.2547	25.2339	24.9698	24.9169	24.5705	24.8906
Q9CQ62	2,4-dienoyl-CoA reductase [(3E)-enoyl-CoA-producing], mitochondrial	10	10	26.0327	25.8284	25.8953	25.8945	25.931	26.0211	25.9259	25.5473	25.9198
Q64FW2	All-trans-retinol 13,14-reductase	5	5	22.2033	21.9278	21.5906	22.3026	22.5683	22.6137	21.9511	21.5665	21.9002
O35638	Cohesin subunit SA-2	5	5	24.1324	23.8221	23.8164	23.9702	23.6406	24.1025	23.6748	23.5962	24.1274
P62983	Ubiquitin-40S ribosomal protein S27a	7	7	26.1608	25.9405	26.3053	26.084	26.2575	26.1537	26.1056	26.0711	25.9095
Q8BFR5	Elongation factor Tu, mitochondrial	16	16	24.3383	23.9947	24.3302	25.6178	25.2493	24.6502	24.0693	24.1365	24.146
Q3UZ39	Leucine-rich repeat flightless-interacting protein 1	8	7	24.325	23.8638	24.3325	24.2939	24.411	24.1433	23.8412	24.2978	24.0585
Q91YX5	Acyl-CoA:lysophosphatidylglycerol acyltransferase 1	1	1			14.5808	15.8995	16.1064	16.4006	14.8449	13.9707	14.4613
P10107	Annexin A1	17	17	26.206	26.1581	26.2244	26.5018	26.7157	26.564	26.0019	26.1877	26.0613
P51437	Cathelicidin antimicrobial peptide	7	7	24.1733	24.1281	24.2254	22.9457	23.0798	22.5981	23.9931	24.2616	23.9193
E9Q0U7	Heat shock protein 105 kDa	3	3		18.3493	17.9215	18.4893	18.4511	18.4217	18.5277	17.34	18.0182
D3YYK8	Microtubule-associated protein RP/EB family member 2 (Fragment)	7	5	23.643	23.685	23.5014	23.5787	23.6472	23.7575	23.5679	23.1613	23.7209
Q4LDF6	Complement factor H-related 2	12	3	22.4661	21.5385	22.5921	22.5223	22.7737	22.9012	21.9045	22.3978	22.1335
Q91VJ4	Serine/threonine-protein kinase 38	8	8	21.361	22.5336	22.5937	22.5771	22.6175	21.7029	22.3642	21.9151	22.147
P20918	Plasminogen	54	54	30.3415	30.2469	30.2845	30.331	30.3299	30.3931	30.1793	30.2117	30.1569
P60670	Nuclear protein localization protein 4 homolog	15	15	26.0559	26.0675	26.1805	26.0999	26.2329	26.2449	26.0595	25.9166	26.0031
Q61656	Probable ATP-dependent RNA helicase DDX5	26	18	27.37	27.2447	27.2471	27.4892	27.5617	27.3486	27.1394	27.2498	27.1532
P62264	40S ribosomal protein S14	3	3	25.8625	25.8583	25.8801	25.4354	25.6947	25.7578	25.826	25.5887	25.8517
Q60847	Collagen alpha-1(XII) chain	24	24	25.4573	25.416	25.3757	25.3186	25.4148	25.2487	25.2529	25.3755	25.3002
F2Z3U3	Ras association (RalGDS/AF-6) and pleckstrin homology domains 1	12	11	22.5875	22.487	22.6503	23.1312	23.2467	23.2588	22.751	22.0075	22.5559
Q9CX00	IST1 homolog	5	5	24.0241	24.2749	23.8492	24.1855	23.7774	24.2038	23.7331	24.0808	24.0293
Q6NZR5	Superkiller viralicidic activity 2-like (S. cerevisiae)	5	5	22.0969	21.82	21.589	22.5822	22.7794	22.4037	22.0762	21.0742	21.9044
E9QLJ0	Cardiomyopathy-associated protein 5	1	1	20.5801	20.4086	20.2492	20.5038	20.5638	20.5117	20.5515	20.0547	20.2977
Q8BNU0	Armadillo repeat-containing protein 6	3	3	20.6676	20.2768	20.1623	20.6092	20.9696	20.6919	20.3942	19.7094	20.6011
P47754	F-actin-capping protein subunit alpha-2	9	6	24.0435	23.9298	24.0527	24.035	23.8994	23.9569	24.0215	23.7975	23.8924
P08121	Collagen alpha-1(III) chain	6	6	22.1902	22.359	22.2689	21.6844	22.4766	21.6993	21.8339	22.265	22.3627
A2AHJ7	Diacylglycerol kinase	3	3	25.0866	25.0317	24.9851	23.8399	23.8087	24.0446	25.0619	24.7447	24.9744
E9Q0J2	Ral GTPase-activating protein subunit beta	1	1	17.707	17.8832	17.2515	17.3423	16.8637		17.536
P97298	Pigment epithelium-derived factor	23	23	30.2299	30.2775	30.2624	29.9988	30.0483	29.9404	30.1455	30.2109	30.1087
O55134	Protocadherin-12	1	1	19.3054	19.2847	19.3592				19.5376	18.7905	19.228
P27048	Small nuclear ribonucleoprotein-associated protein B	4	4	22.6747	21.8948	22.322	22.4948	22.1739	22.4866	22.2475	21.9257	22.4729
Q8VCX1	Aldo-keto reductase family 1 member D1	4	3	20.5821	20.9027	21.1305	21.3331	21.2187	21.0046	21.059	20.4853	20.7719
P47877	Insulin-like growth factor-binding protein 2	13	13	27.0003	26.8223	26.8685	26.3395	26.5118	26.6518	26.7321	26.8008	26.8669
A6H6A4	Leucine-rich repeat and IQ domain-containing protein 4	1	1	26.2515	26.4965	26.4436	25.7733	25.8066	25.8558	26.334	26.2933	26.2822
A0A0R4J257	Protein unc-13 homolog D	1	1	16.6643	17.5336	16.9904	16.2712	16.3496	16.6407	16.8794		17.1325
Q9QYY9	All-trans-retinol dehydrogenase [NAD(+)] ADH4	13	13	27.6907	27.6183	27.8301	27.8973	28.0242	28.0293	27.7311	27.5535	27.5673
Q3THK3	General transcription factor IIF subunit 1	2	2	20.0535	19.6817	19.5525		18.9444	19.1998		19.684
Q9CR86	Calcium-regulated heat stable protein 1	3	3	24.0705	24.2531	24.1936	24.2871	24.254	24.4373	23.968	24.1513	24.1141
Q80ZP8	Armet protein	8	8	24.8483	24.6871	24.6819	24.9178	25.0035	25.1028	24.7279	24.6002	24.6116
P04117	Fatty acid-binding protein, adipocyte	2	2	19.9232	19.597	20.7172	20.1966	20.49	20.3642	19.7914	19.7943	20.4948
P84084	ADP-ribosylation factor 5	6	2	23.594	23.4033	23.5096	23.539	23.6512	23.7472	23.5612	23.3868	23.2798
P28667	MARCKS-related protein	3	3	22.0757	22.1494	22.2131	21.6418	21.9161	21.5411	21.9996	22.0976	22.0721
Q9JJI8	60S ribosomal protein L38	4	4	23.3548	23.5183	23.4429	23.3622	23.1445	23.4724	23.6143	22.8685	23.4664
P84089	Enhancer of rudimentary homolog	2	2	20.2583	20.3908	20.4153	20.4407	20.3602	20.2776	20.1525	20.377	20.2646
Q9Z2X1	Heterogeneous nuclear ribonucleoprotein F	2	2	20.5235	20.5907	20.4149	19.7992	20.0472	19.3556	20.6289	20.4738	20.1194
A1KXC4	Fas apoptotic inhibitory molecule 3	1	1	21.6532	21.4653	21.6591	20.2058	20.4667	20.4963	21.5987	21.6324	21.2622
P10649	Glutathione S-transferase Mu 1	11	11	25.4713	25.4549	25.6245	25.0537	25.0941	24.8884	25.4965	25.3054	25.4868
Q8JZQ9	Eukaryotic translation initiation factor 3 subunit B	32	32	28.0052	27.8658	27.8575	27.8518	28.0179	28.1575	27.859	27.6879	27.9174
Q60737	Casein kinase II subunit alpha	4	4	21.1293	20.7182	18.524	21.214	22.0007	21.3811	20.9784	18.1499	20.7668
P47934	Carnitine O-acetyltransferase	17	17	24.2101	24.3639	24.4149	24.5828	24.6793	24.5537	24.2806	24.1694	24.2863
Q8VDD5	Myosin-9	103	84	31.5432	31.3886	31.4928	30.7812	30.8268	30.7849	31.3652	31.4726	31.3314
P16254	Signal recognition particle 14 kDa protein	3	3	22.7657	22.9309	23.2554	22.3781	22.6008	22.4302	22.8651	22.6706	23.1615
Q9D0C4	tRNA (guanine(37)-N1)-methyltransferase	2	1	15.4867		14.8515	14.5593		15.2463	15.1197
Q8QZR4	Out at first protein homolog	5	5	23.7238	23.9408	24.043	23.5984	23.6606	23.7857	23.7165	23.8729	23.8788
P61161	Actin-related protein 2	11	11	25.6223	25.6938	25.5563	25.5851	25.6229	25.5445	25.5379	25.5358	25.5517
Q9WV55	Vesicle-associated membrane protein-associated protein A	6	5	25.2278	25.0662	25.0233	23.8714	24.8566	24.8179	25.097	25.0503	24.924
Q60967	Bifunctional 3'-phosphoadenosine 5'-phosphosulfate synthase 1	7	5	22.099	21.902	21.8839	22.1541	20.9177	21.9972	22.0602	21.2737	22.1608
Q3THS6	S-adenosylmethionine synthase isoform type-2	6	4	21.1358	20.5031	21.3579	21.5811	21.4797	21.4398	21.0468	20.7737	21.0423
Q9JHL1	Na(+)/H(+) exchange regulatory cofactor NHE-RF2	3	3	21.0096	20.5478	20.3056	21.5029	22.3922	23.2773	18.6345		21.3666
P84078	ADP-ribosylation factor 1	10	7	27.5771	27.5554	27.5526	27.5558	27.641	27.6537	27.4609	27.3369	27.6273
Q3TZL0	Envelope polyprotein	1	1	21.5732	21.4483	21.7841	22.3269	22.1718	22.2157	21.8733	20.6299	21.7809
P18653	Ribosomal protein S6 kinase alpha-1	14	7	22.2	22.3133	22.2724	22.0553	20.8458	22.343	22.2874	22.201	22.0471
P63276	40S ribosomal protein S17	3	3	24.706	25.4742	24.3131	24.7524	24.1807	24.5531	24.8006	24.7733	24.9212
Q9CQM9	Glutaredoxin-3	5	5	21.5362	21.5989	21.4213	21.7603	22.2258	22.3189	21.2643	21.6143	21.4246
P62309	Small nuclear ribonucleoprotein G	1	1	23.6697	23.5823	23.5414	23.5678	23.7517	23.9189	23.6846	23.0461	23.7358
Q8JZR0	Long-chain-fatty-acid--CoA ligase 5	23	20	26.35	26.2499	26.4031	26.2703	26.1913	26.2468	26.3311	26.1707	26.2685
P17182	Alpha-enolase	31	16	31.2802	31.2926	31.2727	31.4497	31.4365	31.3853	31.1931	31.248	31.1711
Q68FL6	Methionine--tRNA ligase, cytoplasmic	24	24	27.4559	27.4145	27.4737	27.5493	27.6258	27.5884	27.4517	27.2711	27.3851
A0A0R4IZY2	Cytochrome P450 2D26	22	17	27.0102	26.9272	27.0347	27.9645	27.8521	27.8261	26.9721	26.9358	26.8317
P56593	Cytochrome P450 2A12	15	9	25.3866	25.1892	25.4325	25.1098	25.0643	25.0402	25.2787	25.2884	25.2208
Q62009	Periostin	25	22	26.6874	26.5504	26.7202	25.8663	25.867	25.8467	26.6488	26.603	26.4789
Q02566	Myosin-6	54	17	25.2002	25.2171	25.251	24.0293	24.5147	24.3089	24.901	25.116	25.384
Q9QYS9	Protein quaking	2	2	21.4283	21.3023	21.5639	20.3364	22.0176	22.0674	21.9197	21.1959	20.7008
Q00356	Mast cell protease-like protein	1	1	16.856	17.238	16.9199	16.6331			17.3297	16.4018
Q99MQ4	Asporin	8	8	27.4891	27.2653	27.5031	27.6135	27.771	27.6397	27.3986	27.3885	27.2529
Q9D7H3	RNA 3'-terminal phosphate cyclase	4	4	22.7131	22.352	22.555	22.3601	23.0474	22.7482	22.6813	22.3808	22.3327
P62717	60S ribosomal protein L18a	7	7	23.6507	23.7662	23.6487	23.7853	23.7965	23.5935	23.6857	23.6399	23.5172
A0A1W2P6H1	Non-specific serine/threonine protein kinase	3	2	20.6651	20.4745	20.4449	20.8137	20.9087	21.1451	20.6716	19.9748	20.6281
Q61176	Arginase-1	20	20	28.8243	28.6736	28.8222	28.9506	29.005	28.9427	28.6886	28.7606	28.6559
P26516	26S proteasome non-ATPase regulatory subunit 7	8	8	24.9465	25.1283	25.1515	24.683	24.7822	24.6423	25.0981	24.8036	25.0965
Q9JHI0	Matrix metalloproteinase-19	9	9	23.4159	23.3747	23.5865	23.5237	23.4818	23.7002	23.1926	23.5534	23.4071
Q9DCN2	NADH-cytochrome b5 reductase 3	9	9	26.9604	27.0629	27.1295	26.8775	26.6511	26.6172	27.0975	27.0632	26.765
A0A1W2P7Q9	Myosin light polypeptide 6	10	8	27.983	27.9786	28.0017	28.1471	28.1038	28.1279	27.8192	27.9452	27.9855
P97872	Flavin-containing monooxygenase 5	28	28	26.9064	26.8024	26.8433	27.4556	27.5511	27.493	26.7822	26.7726	26.7907
Q9R1Q7	Proteolipid protein 2	1	1	25.2056	25.3016	25.0202	24.6589	24.8183	24.7043	24.9422	25.1589	25.218
P45700	Mannosyl-oligosaccharide 1,2-alpha-mannosidase IA	21	21	27.0011	26.9576	27.0075	27.1032	27.1591	27.1716	26.9855	26.8799	26.8918
Q8BWT1	3-ketoacyl-CoA thiolase, mitochondrial	12	12	26.6979	26.7957	26.7594	26.88	26.9208	26.88	26.728	26.574	26.74
Q6NVF0	Inositol polyphosphate 5-phosphatase OCRL	1	1	14.6057	14.4642	14.8259	14.8545	14.3181	15.0599	14.7457	13.6661	14.9902
O35488	Very long-chain acyl-CoA synthetase	17	17	26.7383	26.6183	26.8404	26.9167	27.1118	27.0189	26.6417	26.8051	26.5439
Q62452	UDP-glucuronosyltransferase 1A9	9	4	19.0885	19.109	18.9042	20.4589	20.6741	21.2938	18.7801	18.9753	19.1324
Q9DCW4	Electron transfer flavoprotein subunit beta	14	14	27.6105	27.5318	27.7464	27.9307	27.9528	27.9455	27.6204	27.484	27.5899
Q99KV1	DnaJ homolog subfamily B member 11	5	5	21.8686	21.4947	21.4125	22.0372	22.2907	22.069	21.2961	21.7946	21.4835
P61982	14-3-3 protein gamma	4	2	22.095	21.301	21.1786	20.0864	21.6115	21.407	21.5308	22.0464	20.658
Q8WTY4	Anamorsin	4	4	22.7179	22.7313	22.9553	22.6694	22.6696	22.5577	22.757	22.6121	22.8416
Q6PDM2	Serine/arginine-rich splicing factor 1	12	12	25.8267	25.7032	25.8262	26.2174	26.1744	26.2157	25.7319	25.6873	25.747
Q9Z2M7	Phosphomannomutase 2	12	12	25.0593	24.8191	25.1108	25.1603	25.2265	25.2822	24.9367	24.898	24.978
Q9ESU6	Bromodomain-containing protein 4	1	1	15.6634	15.7695	15.2118	15.7893	15.556		15.5039
P63082	V-type proton ATPase 16 kDa proteolipid subunit	1	1	19.3998	19.2486		20.4289	19.9308	20.0829	18.9394	19.533	19.2559
Q61768	Kinesin-1 heavy chain	40	40	27.9029	27.9105	27.8439	27.7374	27.884	27.9178	28.1046	27.4021	27.8781
A0A7N9VR94	AHNAK nucleoprotein 2	9	9	25.6742	25.0017	25.6193	25.7273	25.7677	25.8115	25.6899	24.862	25.5262
Q9JI78	Peptide-N(4)-(N-acetyl-beta-glucosaminyl)asparagine amidase	1	1	19.49	19.4542	19.0508	19.8092	19.9988	19.903	19.3137	19.1661	19.3706
Q61210	Rho guanine nucleotide exchange factor 1	8	8	23.7822	23.6464	23.7079	24.1535	24.1709	24.0622	23.7491	23.6855	23.5189
Q3U0V1	Far upstream element-binding protein 2	19	18	27.3106	27.2604	27.2356	27.1744	27.3035	27.2479	27.211	27.2075	27.213
Q62351	Transferrin receptor protein 1	26	26	28.2335	27.817	27.9577	28.008	28.457	27.9013	27.9132	27.9841	27.9657
Q9ET26	E3 ubiquitin-protein ligase RNF114	8	8	25.0716	25.0433	25.1286	25.01	25.0932	25.1879	24.9196	25.0719	25.0726
D3Z1M1	Guanine nucleotide-binding protein G(I)/G(S)/G(T) subunit beta-2 (Fragment)	5	5	22.4157	21.9318	22.9492	23.2302	23.211	22.8686	22.4277	22.2229	22.6224
P29788	Vitronectin	20	20	29.1454	29.0423	29.0666	29.3624	29.4251	29.4325	29.0641	28.9552	29.0615
P51658	Estradiol 17-beta-dehydrogenase 2	7	7	23.7846	23.3626	23.4912	24.2682	24.2089	24.4955	23.6552	23.4547	23.3776
Q65CL1	Catenin alpha-3	2	1	17.9879	18.4449	17.8908	17.2079	16.8411	16.7866	17.8428		18.2702
F6R8S6	Proline-rich AKT1 substrate 1 (Fragment)	1	1	15.8267	16.0681	15.6926	16.0314	16.1867	16.0997	16.138		15.3972
P62141	Serine/threonine-protein phosphatase PP1-beta catalytic subunit	9	6	23.9716	23.5683	24.2648	24.3251	24.5004	24.2784	24.1585	23.4096	24.0454
Q8VE70	Programmed cell death protein 10	11	11	24.215	23.7742	23.8279	24.0264	24.1163	23.9457	23.9345	23.7599	23.9868
A0A668KL36	Coiled-coil domain-containing protein 50	2	2	19.7335	20.082	19.9183	19.6744	20.2318	20.2958	19.8561	19.6831	20.0292
P60710	Actin, cytoplasmic 1	19	9	28.1941	28.2064	28.1365	28.1691	28.3588	28.4294	28.0658	28.1386	28.1676
P15327	Bisphosphoglycerate mutase	7	7	28.1922	28.4446	28.2366	27.6079	27.692	27.7983	28.1034	28.179	28.4241
Q02013	Aquaporin-1	3	3	19.717	20.3274	18.8226	20.2606	21.2818	20.1643	19.848		19.523
Q8C0C7	Phenylalanine--tRNA ligase alpha subunit	18	18	26.0333	26.1956	26.0908	26.1357	26.2897	26.0283	26.0862	26.0022	26.081
O35601	FYN-binding protein 1	9	9	23.8058	23.8021	23.592	23.3101	23.13	23.8263	23.6833	23.5557	23.807
Q9DCL9	Multifunctional protein ADE2	11	11	26.5572	26.3357	26.5128	26.7458	26.778	26.7401	26.468	26.4736	26.3163
O55091	Protein IMPACT	3	3	19.6509	19.4811	19.0519	19.9067	19.9463	19.598		19.5803	19.1129
P62267	40S ribosomal protein S23	2	2	24.026	23.9816	24.1242	23.9565	24.0217	24.0973	24.0532	23.9548	23.9742
A0A571BEV2	Predicted gene 8251	24	24	26.2192	26.1144	26.1371	25.7918	25.9733	25.6632	26.0532	26.101	26.1652
F6X2V9	Protein LSM14 homolog A (Fragment)	2	2	19.336	18.6809	18.4131	19.0316	18.8198	19.0724	19.5111	17.752	18.6619
P97371	Proteasome activator complex subunit 1	15	14	28.2338	28.2479	28.3456	29.58	28.8449	28.877	28.1899	28.2835	28.2086
E9QA15	Caldesmon 1	17	17	26.5802	26.4053	26.4893	26.0411	26.0695	25.8464	26.5355	26.3904	26.4048
F6QFD1	Phosphodiesterase (Fragment)	1	1	21.2404	21.341	21.1727	21.3862	20.9105	21.0469	21.0987	21.4259	21.0647
Q60710	Deoxynucleoside triphosphate triphosphohydrolase SAMHD1	21	21	25.5825	25.5292	25.7753	25.8167	25.7745	25.6568	25.5776	25.4623	25.7079
P50544	Very long-chain specific acyl-CoA dehydrogenase, mitochondrial	28	28	26.3504	26.2284	26.8153	26.3688	26.2519	26.4452	26.3598	26.3847	26.5707
P32883	GTPase KRas	4	4	23.075	22.1997	23.1511	23.1453	23.0214	23.3032	22.7879	22.7708	22.9043
Q61598	Rab GDP dissociation inhibitor beta	6	6	25.3061	25.0792	25.2802	24.0394	24.028	23.5238	24.9861	25.443	25.0671
Q8CG16	Complement C1r-A subcomponent	18	18	26.9429	27.1301	26.9242	27.1683	27.1326	27.1719	26.9264	27.0292	26.9123
Q5RKN9	F-actin-capping protein subunit alpha	11	8	26.9004	26.9434	27.0059	27.1155	27.1009	26.9708	26.8481	26.9794	26.8896
Q9R112	Sulfide:quinone oxidoreductase, mitochondrial	8	8	22.5319	22.3898	23.2519	23.2361	22.3644	23.231	22.7621	23.0494	22.2863
Q3UVL4	Vacuolar protein sorting-associated protein 51 homolog	1	1	17.1858	17.4534	17.1467	17.5809	17.629	17.6909	17.2184		17.232
Q60676	Serine/threonine-protein phosphatase 5	13	13	24.6767	24.7097	24.4828	24.679	24.4432	24.5673	24.3889	24.5192	24.8096
Q2NL51	Glycogen synthase kinase-3 alpha	6	2	20.5838	20.9009	20.8272	20.2875	20.4333	20.8285	20.4223	20.7966	20.9378
Q922B1	ADP-ribose glycohydrolase MACROD1	10	10	26.7026	26.6128	26.7667	26.7985	26.7702	26.7652	26.6403	26.7555	26.5623
B1AR74	Breast carcinoma-amplified sequence 3 homolog	4	4	21.0112	20.9914	21.0768	17.2743	20.3356	20.6051	21.3097	20.9461	20.6227
P54869	Hydroxymethylglutaryl-CoA synthase, mitochondrial	13	12	28.6633	28.5905	28.5635	29.0597	29.0962	28.8783	28.53	28.5296	28.6386
P14115	60S ribosomal protein L27a	4	4	25.6059	25.7046	25.5935	26.2505	26.2356	26.2775	25.3952	25.8099	25.5536
Q9DBD0	Inhibitor of carbonic anhydrase	30	30	26.7062	26.7752	26.8182	26.6726	26.6035	26.7086	26.7187	26.7108	26.7554
O08529	Calpain-2 catalytic subunit	2	2	18.9845	18.9341	19.2761	18.8523	18.7759	19.1262	19.0351
O35452	Tenascin X	11	11	22.2063	22.1062	22.2485	22.1027	21.8189	22.195	22.419	21.499	22.3632
O54916	RalBP1-associated Eps domain-containing protein 1	3	3	22.1456	21.8235	22.219	22.2926	22.177	22.0581	21.8452	21.9248	22.2945
Q99MZ7	Peroxisomal trans-2-enoyl-CoA reductase	11	11	26.8013	26.6011	26.516	27.0571	26.9913	27.0617	26.627	26.5366	26.6548
Q9DCH4	Eukaryotic translation initiation factor 3 subunit F	12	12	26.6365	26.5146	26.7284	26.7166	26.822	26.864	26.6001	26.674	26.4956
Q7TN83	Synaptotagmin-16	1	1	24.0803	23.9478	23.799	23.5956	23.6941	23.6616	23.8548	23.7215	24.1235
Q64442	Sorbitol dehydrogenase	5	5	21.4288	20.3894	21.4994	21.5564	22.119	22.1586	21.8042	20.1368	21.0458
Q62245	Son of sevenless homolog 1	1	1	15.2912	14.8154	14.7905		15.2187	14.9201	15.0646		14.8211
G3X9T7	Galectin-9	9	9	23.6855	23.5557	23.5989	23.6517	23.5727	23.7512	23.5119	23.5571	23.662
A2A432	Cullin-4B	17	12	24.57	24.409	24.2155	24.6016	24.84	24.7049	24.3762	24.236	24.4867
Q4LDG0	Bile acyl-CoA synthetase	13	13	24.7205	24.5402	24.7843	25.9347	25.8248	25.7752	24.8824	24.5331	24.5038
Q9QXK3	Coatomer subunit gamma-2	10	9	23.5697	22.975	23.2148	23.4296	23.5017	23.4748	23.2075	22.7933	23.6039
Q9WUM5	Succinate--CoA ligase [ADP/GDP-forming] subunit alpha, mitochondrial	10	10	26.568	26.5037	26.6366	26.6797	26.6254	26.6759	26.4309	26.6667	26.5006
P13020	Gelsolin	32	32	29.1184	28.9916	29.1512	29.1894	29.3157	29.2379	29.1167	28.9562	29.0865
O88968	Transcobalamin-2	12	12	25.8628	25.7582	25.9108	25.7083	25.8204	25.4755	26.0101	25.7507	25.6507
A0A286YDS5	Transmembrane emp24 domain-containing protein 9	1	1	19.9024	20.3697	20.1968	20.7111	20.7689	20.8687		20.1468	20.1243
P63005	Platelet-activating factor acetylhydrolase IB subunit beta	21	21	26.7107	26.9244	26.9631	27.0056	27.1062	27.0591	26.821	26.9016	26.7883
A0A075B666	Immunoglobulin kappa chain variable 13-85 (Fragment)	2	2	23.1468	23.1309	23.4896	23.1629	22.4633	22.9283	23.0454	23.3066	23.331
Q9DAW9	Calponin-3	5	4	21.2379	21.436	21.2363	21.6436	21.6664	21.7593	21.6197	21.0393	21.0978
Q8R121	Protein Z-dependent protease inhibitor	1	1	20.3012	19.8044		19.938	19.4654		19.985	20.1356	20.0098
Q8K0R6	Glycolipid transfer protein domain-containing protein 2	2	2	22.3081			22.4278		22.0551	22.2801
E9Q7C8	Cytochrome P450 2C40	10	8	24.2825	24.326	24.2854	25.1135	24.9971	24.8347	24.3872	24.1647	24.2504
O55142	60S ribosomal protein L35a	3	3	22.2276	21.7787	22.2891	22.8651	22.7111	22.8032	22.2336	22.0038	22.015
P97855	Ras GTPase-activating protein-binding protein 1	8	8	24.5147	24.2743	24.6635	24.7005	24.858	24.693	24.703	24.4705	24.1751
Q9ESJ4	NCK-interacting protein with SH3 domain	1	1	14.7826	14.2894	14.803	16.1576	14.5099	14.8745	14.7504	14.5588	14.532
Q99KC8	von Willebrand factor A domain-containing protein 5A	21	21	25.9363	25.891	25.8075	26.1977	26.1104	27.2918	25.9101	25.7587	25.8848
E9PUD2	Dynamin-1-like protein	20	20	25.9642	25.9084	25.8774	26.1431	26.0987	25.9992	25.8857	25.8179	25.9663
Q9R069	Basal cell adhesion molecule	2	2	23.9201	23.9095	23.8386	23.569	23.8438	23.9109	23.7769	23.874	23.9377
P82198	Transforming growth factor-beta-induced protein ig-h3	14	14	26.0497	26.1051	26.0912	25.8454	25.9497	25.9428	26.0389	25.9991	26.1316
E9PXY8	Ubiquitin carboxyl-terminal hydrolase 7	8	8	21.383	21.0714	21.08	21.6891	21.6394	21.7168	21.6503	21.1641	20.4133
P27773	Protein disulfide-isomerase A3	28	24	28.6047	28.5923	28.6943	29.0904	29.2285	29.0992	28.5398	28.6772	28.6079
O70551	SRSF protein kinase 1	2	2	19.281	18.5536	19.1413	19.2171	19.4322	19.5364	19.0475	18.7296	19.1941
O54774	AP-3 complex subunit delta-1	9	9	24.4145	24.2994	24.1853	24.5451	24.5242	24.4582	24.4119	23.951	24.433
Q64523	Histone H2A type 2-C	2	2	22.0367	22.3996		22.0943	21.7681	21.9152	22.1388	22.2339	22.2508
P51885	Lumican	1	1	19.9617	19.6873	20.0386	18.9481	20.0322	19.967			19.8827
Q9WVA4	Transgelin-2	8	8	23.9639	24.0029	23.9224	23.97	23.9981	23.9343	23.8609	23.8333	24.1177
Q91X77	Cytochrome P450 2C50	27	6	28.0651	28.0665	28.0024	28.5981	28.6718	28.5891	28.014	27.9928	28.0666
Q9CZM2	60S ribosomal protein L15	6	6	23.9909	23.8113	23.8322	24.1649	24.2097	24.0789	23.9525	23.8095	23.8148
P55284	Cadherin-5	4	4	22.1748	22.1185	22.0696	22.1989	22.5073	22.2077	22.1806	22.2149	21.8882
Q9D8B3	Charged multivesicular body protein 4b	7	7	27.6536	27.8156	27.7159	27.4139	27.7123	27.7147	27.6971	27.6333	27.7969
Q91V41	Ras-related protein Rab-14	11	10	27.8713	27.9465	27.861	27.8816	27.9559	27.9468	27.7349	27.8887	27.9903
O88947	Coagulation factor X	15	15	26.1156	26.1171	26.2021	26.286	26.4285	26.3325	26.1226	26.0497	26.2058
Q3U7K7	E3 ubiquitin-protein ligase TRIM21	1	1	16.731	17.7037	16.8194	17.3167	17.6495	17.1735	17.1375
Q8K0C5	Zymogen granule membrane protein 16	1	1	21.4497	21.0534	21.2979	21.6892	20.9567	20.7402	21.6983	20.6175	21.2627
Q80UG5	Septin-9	17	17	27.2587	27.2486	27.1862	26.9843	27.0573	27.0835	27.234	27.1128	27.2915
P63037	DnaJ homolog subfamily A member 1	14	14	25.9741	25.7591	25.7723	25.8603	26.0425	26.1082	25.8015	25.7049	25.9507
A0A0G2JEC4	Endophilin-B1	8	8	23.2011	23.0862	23.075	23.241	23.479	23.3684	22.9525	22.7259	23.5222
Q8K2Q7	BRO1 domain-containing protein BROX	1	1	23.3652	23.6965	23.7116	23.1342	23.449	22.9008	23.81	23.3812	23.5317
Q9R0K7	Plasma membrane calcium-transporting ATPase 2	6	4	26.0854	26.1596	26.1354	26.4056	26.4484	26.3866	26.0182	26.1654	26.1518
A2AJ72	Far upstream element (FUSE)-binding protein 3	7	6	22.7836	22.6135	22.6067	22.8534	22.9447	22.7437	22.8998	22.2043	22.7751
P05132	cAMP-dependent protein kinase catalytic subunit alpha	6	2	28.0063	27.9924	27.8789	28.2081	28.0648	28.0717	28.1152	27.8245	27.8858
Q80YX1	Tenascin	1	1	16.5132	16.251	16.5163	17.1929	17.0462	16.8927	16.4193
Q61712	DnaJ homolog subfamily C member 1	2	2	19.7611	20.5837	19.4801		20.2152			20.0082
Q61545	RNA-binding protein EWS	3	3	24.3358	24.1258	24.0127	24.3328	24.5129	24.0788	24.3491	23.8364	24.2238
D4AFX7	DnaJ heat shock protein family (Hsp40) member C13	9	9	22.0389	22.6537	22.1522	21.6342	22.0743	22.1899	21.6341	23.0488	21.7425
Q9EQS3	c-Myc-binding protein	4	4	22.3263	22.4502	22.4187	22.6997	22.6515	22.7137	22.222	22.2105	22.6789
Q8K182	Complement component C8 alpha chain	14	14	26.2189	26.1763	26.1543	25.5221	25.6367	25.5565	26.2059	26.2341	26.0699
P55065	Phospholipid transfer protein	17	17	27.6189	27.6034	27.554	27.4343	27.4601	27.4176	27.7736	27.389	27.5555
Q6P6L5	Myosin-binding protein C, slow-type	54	13	30.4385	30.4602	30.4223	30.1247	30.1338	30.1462	30.4201	30.3426	30.5218
A0A3B2WCE8	CCAAT/enhancer-binding protein zeta	1	1	21.2835	21.3038	21.0924	21.4202	21.7705	21.7696	21.303	20.8513	21.4404
P61255	60S ribosomal protein L26	4	4	24.0889	24.1834	24.1677	24.6056	24.5518	24.4731	24.2783	24.0027	24.118
E9PV44	ATP synthase F1 subunit epsilon	1	1	20.62	20.7352	20.497	21.0814	20.9362	21.2908	20.9653	20.0123	20.6969
Q9Z1N5	Spliceosome RNA helicase Ddx39b	11	4	24.8216	25.0878	24.9664	25.1262	25.0816	24.9339	24.9334	24.8868	25.0354
P97770	THUMP domain-containing protein 3	3	3	20.1508	20.0729	19.5729	19.8024	20.2114	20.7975	20.229	19.4998	20.0125
P35821	Tyrosine-protein phosphatase non-receptor type 1	7	7	22.0201	22.0863	22.4234	21.653	21.8397	21.9127	22.2453	22.044	22.2383
P62334	26S proteasome regulatory subunit 10B	9	9	26.503	26.586	26.5301	26.5408	26.3791	26.4025	26.5528	26.5938	26.4441
E9Q166	ATPase family, AAA domain-containing 2B	1	1	27.2495	27.1041	27.2653	27.2518	27.4222	27.1424	27.0941	27.3217	27.175
Q8BL97	Serine/arginine-rich splicing factor 7	7	7	23.9829	23.7939	23.9858	24.5226	24.4072	24.4381	23.7599	23.833	24.1285
Q8BH95	Enoyl-CoA hydratase, mitochondrial	9	9	26.4532	26.4424	26.4021	26.9454	26.8642	26.8156	26.4101	26.4754	26.3909
Q9EPC1	Alpha-parvin	8	7	24.0099	23.8506	23.6837	23.4783	23.3122	23.6335	24.1632	23.6145	23.7044
Q9CQA3	Succinate dehydrogenase [ubiquinone] iron-sulfur subunit, mitochondrial	4	4	18.2678	20.6657	20.4954	20.6293	21.0604	21.1508	19.4443	20.1434	20.5844
Q9JM76	Actin-related protein 2/3 complex subunit 3	5	5	21.5758	22.0938	21.4234	21.8558	21.8194	21.7304	22.1415	21.6188	21.2696
P63242	Eukaryotic translation initiation factor 5A-1	7	7	26.1769	26.1647	26.3134	26.324	26.6657	26.6549	26.2584	26.3123	26.0618
Q9CT10	Ran-binding protein 3	5	5	23.949	23.9121	23.954	23.3969	24.6275	22.9624	23.6121	24.5124	23.4328
Q9D172	Glutamine amidotransferase-like class 1 domain-containing protein 3A, mitochondrial	5	5	22.2002	22.2505	22.4661	22.8005	22.886	22.6605	22.2633	22.397	22.2522
P47911	60S ribosomal protein L6	8	8	24.7468	24.6252	24.6745	25.3558	25.2023	25.7288	24.5029	24.1544	25.1847
Q8VHX6	Filamin-C	3	1		16.3518		17.2973	16.7663	16.8809	16.4585		16.2296
P08071	Lactotransferrin	36	36	28.5701	28.6004	28.656	28.584	28.6467	28.6154	28.6267	28.5739	28.6176
Q64511	DNA topoisomerase 2-beta	5	5	20.9304	20.546	20.9748				20.9687	20.6687
Q9D7G0	Ribose-phosphate pyrophosphokinase 1	13	10	26.7231	26.6267	26.6515	26.7256	26.8321	26.7316	26.7019	26.6208	26.6726
P68510	14-3-3 protein eta	4	2	21.0561	20.5084	20.7892	21.5738	20.5545	21.3259	21.6947	19.9919	19.9894
B1ART1	Vacuolar protein sorting 13D	7	7	24.5326	24.8949	24.6598	24.8762	25.0227	24.857	24.7012	24.7741	24.6302
Q8K1X1	WD repeat-containing protein 11	3	3	24.9174	25.0671	25.0283	25.0987	25.2446	25.2402	24.9087	25.0697	25.0332
P97290	Plasma protease C1 inhibitor	17	17	28.4793	28.5052	28.5244	28.601	28.6253	28.5409	28.5134	28.5112	28.4849
Q9JL26	Formin-like protein 1	3	3	17.2282	17.7372	17.1161	18.0699	17.1303	17.5643			17.3868
P70671	Interferon regulatory factor 3	4	4	19.6591	20.4935	19.9477	19.9609	20.973	21.1231	20.0127	19.5037	20.5355
P97372	Proteasome activator complex subunit 2	14	13	25.4161	25.8007	25.3797	25.8685	25.8284	25.9387	25.5599	25.5565	25.528
Q93092	Transaldolase	10	10	25.8059	25.6734	25.6578	25.2625	25.3071	25.4307	25.7872	25.5413	25.8102
Q3V2R3	Chimaerin	1	1	17.9499	18.0349	17.517	17.6344	17.7304	17.9563	17.9464		17.7597
P24270	Catalase	25	25	28.3132	28.2704	28.2604	28.6377	28.6884	28.7694	28.2455	28.2794	28.334
P39688	Tyrosine-protein kinase Fyn	5	5	24.847	24.8096	24.7705	24.3878	24.2347	24.7777	24.9379	24.7208	24.7785
Q8K1B8	Fermitin family homolog 3	29	29	27.7579	27.702	27.9819	27.5703	27.5709	27.5475	27.7626	27.8959	27.8141
P18760	Cofilin-1	10	9	29.419	29.4424	29.4149	29.4045	29.369	29.3303	29.419	29.3888	29.4872
Q9WVA2	Mitochondrial import inner membrane translocase subunit Tim8 A	4	4	22.8745	23.0831	22.7227	23.0467	23.0371	23.2093	22.9155	22.7471	23.0459
A2AEC2	Transcription elongation factor A protein-like 3 (Fragment)	1	1	16.66	17.1714	16.8526	17.3391	16.6897	16.922	17.4035	15.5103	17.2065
Q6ZWY3	40S ribosomal protein S27-like	6	2	25.0646	24.8641	24.6937	25.0866	25.107	25.0468	25.0453	24.6145	24.973
Q6PDN3	Myosin light chain kinase, smooth muscle	20	19	25.0263	24.899	24.9257	25.0609	25.2064	25.1839	25.0639	24.9104	24.8978
Q569Z5	Probable ATP-dependent RNA helicase DDX46	8	8	23.3654	23.1586	23.1865	23.3704	23.4722	23.1107	23.2846	23.299	23.1595
Q3TUQ7	Acetyl-CoA carboxylase kinase	15	13	26.297	26.1776	26.2992	26.1644	26.5453	26.4838	26.1872	26.386	26.2261
Q8C2Q3	RNA-binding protein 14	6	4	22.6955	22.8928	22.616	22.9979	23.051	23.113	22.7735	22.6164	22.8542
Q9D1H7	Golgi to ER traffic protein 4 homolog	2	2	21.3023	21.6153	21.5564	21.5282	21.7481	21.3587	21.3966	21.6341	21.4908
Q60749	KH domain-containing, RNA-binding, signal transduction-associated protein 1	2	2	20.4296	21.3521	20.4776	21.6884	21.9427	21.9396	21.2668	20.9542	19.9941
A2AN08	E3 ubiquitin-protein ligase UBR4	47	47	26.4796	26.4222	26.7642	26.4832	26.4226	26.4296	26.5978	26.5685	26.5624
Q8C6B0	Methyltransferase-like 7A1	11	11	25.4218	25.5942	25.5456	26.0206	26.0854	26.1725	25.515	25.4089	25.6715
Q8BH61	Coagulation factor XIII A chain	28	27	29.721	29.4746	29.7577	29.6932	29.7884	29.7175	29.7042	29.6384	29.6668
P62281	40S ribosomal protein S11	6	6	24.8121	24.6963	24.6228	24.6122	24.5742	24.8739	24.8457	24.5766	24.7515
Q9CY27	Very-long-chain enoyl-CoA reductase	5	5		19.6264	22.6895	22.5806	22.7698	22.6465	21.592	18.3871	22.9291
Q99LB4	Macrophage-capping protein	4	4	22.4139	23.0831	22.8108	23.142	23.2535	23.3035	22.7625	22.5493	23.076
Q8R5H1	Ubiquitin carboxyl-terminal hydrolase 15	7	6	22.0295	22.0294	22.024	21.957	21.4774	21.3719	22.3073	22.07	21.6974
P38585	Tubulin--tyrosine ligase	1	1	15.8263	16.2299		14.1427	16.1654	16.4204	16.0618
Q9Z2Y8	Pyridoxal phosphate homeostasis protein	10	10	25.2061	24.412	24.214	25.2944	24.6887	24.9481	24.6147	24.6758	24.7946
A0A075B5M4	Immunoglobulin kappa variable 4-57-1 (Fragment)	2	1	21.3111	20.9037	21.0736	21.0863	21.037	21.1011	21.0829	20.9917	21.2862
P38647	Stress-70 protein, mitochondrial	10	10	25.9798	26.2637	26.0651	26.4299	26.5466	26.6275	26.064	26.1338	26.1838
Q9JMA1	Ubiquitin carboxyl-terminal hydrolase 14	20	20	28.0239	27.9654	27.9854	28.0207	28.196	28.1841	27.8434	27.9828	28.1934
P68433	Histone H3.1	3	3	20.8742	20.8894	20.762	20.0902	20.1053	19.7431	20.8425	21.0707	20.6546
O70318	Band 4.1-like protein 2	11	10	22.3853	23.4576	23.3391	25.2294	25.1546	25.3576	23.1761	22.8499	23.3935
Q91YT2	E3 ubiquitin-protein ligase RNF185	1	1		14.8962		16.6789	16.3996	16.9455	14.9194
P02088	Hemoglobin subunit beta-1	18	12	35.1813	35.3952	35.1682	35.4587	35.362	35.3705	35.2377	35.3354	35.2518
D3Z4J9	Echinoderm microtubule-associated protein-like 1	12	12	21.333	21.4808	20.8559	21.5179	21.7083	21.0502	21.0442	21.4666	21.2702
Q8VCH8	UBX domain-containing protein 4	4	4	20.1491	20.1391	19.6992	20.8883	20.9365	20.9342	19.2126	20.5553
P15508	Spectrin beta chain, erythrocytic	5	5	24.0346	23.7872	23.9248	24.2934	24.1831	24.2098	24.0211	23.8569	23.948
Q6P542	ATP-binding cassette sub-family F member 1	13	13	23.6327	23.8894	23.951	23.5114	23.3456	23.4884	24.0902	23.6269	23.8119
A0A140T8M2	Immunoglobulin kappa variable 12-44 (Fragment)	3	1	23.8185	23.8895	24.0394	23.7075	24.0688	23.7522	23.8678	24.0353	23.9256
Q91VR5	ATP-dependent RNA helicase DDX1	32	32	26.7415	26.74	26.7912	26.8074	27.3673	26.8912	26.8177	27.0106	26.4792
Q9QXF8	Glycine N-methyltransferase	9	9	25.4276	25.1848	25.4445	25.4942	25.4983	25.3286	25.3318	25.4488	25.3742
G3X8T3	Carboxypeptidase	1	1		15.1292	15.3983	15.8323	14.9658	15.5365			15.2988
Q9CR16	Peptidyl-prolyl cis-trans isomerase D	12	12	26.2868	26.548	26.6032	26.6195	26.5708	26.5844	26.5135	26.6273	26.3984
Q9R0U0	Serine/arginine-rich splicing factor 10	3	3	20.9223	21.1652	20.2597	21.8017	21.1494	21.7024	21.1778	20.3876	20.9124
Q8BFR2	Follistatin-related protein 5	2	2	22.7947	23.2801	23.0732	23.3685	23.441	23.5063	22.8031	23.613	22.6808
F6T4M4	Serine/arginine repetitive matrix protein 1 (Fragment)	1	1	27.5792	27.6485	27.4918	27.8637	28.0749	27.9083	27.7314	27.3258	27.7272
Q3TNA1	Xylulose kinase	8	8	24.1941	23.6411	24.2232	24.3268	24.6364	24.5851	23.8277	24.1546	24.2181
A0A140LIT2	7-dehydrocholesterol reductase	1	1	19.683	19.8923	20.1626	21.4003	21.8828	21.7628	19.8362	19.6216	20.329
Q9DD20	Methyltransferase-like protein 7B	9	9	25.963	25.7459	25.8892	26.2447	26.5181	26.5731	25.931	25.8401	25.9376
Q64458	Cytochrome P450 2C29	23	14	27.9089	27.7549	27.8829	28.8135	28.7504	28.722	27.9191	27.929	27.8055
E9PUD0	Zinc finger Ran-binding domain-containing protein 2	1	1	20.5087	20.7621	20.0618	21.0379	21.3661	21.3106	20.3705	20.0487	20.9557
Q9QZ73	DCN1-like protein 1	8	8	23.879	23.8676	23.7504	24.1215	24.1408	24.1501	24.0185	23.9293	23.6326
Q61029	Lamina-associated polypeptide 2, isoforms beta/delta/epsilon/gamma	6	6	28.2548	28.1042	28.1286	27.4749	27.7271	27.8298	28.4971	27.7925	28.2252
P06327	Ig heavy chain V region VH558 A1/A4	1	1	19.5155	19.1861	19.2432	20.875	20.8585	20.5751	19.0113	19.3224	19.6683
P62077	Mitochondrial import inner membrane translocase subunit Tim8 B	4	4	22.6446	22.5923	22.4939	23.3301	23.2996	23.3268	22.6894	22.212	22.8671
P50172	Corticosteroid 11-beta-dehydrogenase isozyme 1	10	10	27.1855	26.8087	27.0327	28.0645	27.9889	27.9394	26.9942	26.9925	27.1697
E9PZF0	Nucleoside diphosphate kinase	8	4	24.255	24.5316	23.7333	25.0361	24.9503	24.9622	24.2432	24.3349	24.1621
E9PYJ6	Focadhesin	15	15	26.6496	26.5589	26.5728	26.3127	26.5004	26.2525	26.7151	26.554	26.6258
G3X9Q6	La-related protein 4	1	1	19.534	19.8903	19.401	19.7735	19.9494	19.8237	20.0416	19.147
Q6PB44	Tyrosine-protein phosphatase non-receptor type 23	3	3	21.6993	21.4351	21.4189	21.7189	21.6725	21.4491	21.7174	21.3772	21.5741
Q8VE62	Polyadenylate-binding protein-interacting protein 1	5	5	21.471	21.5383	22.2133	21.8872	22.2208	22.1441	21.1256	21.9652	22.1741
Q8K4I3	Rho guanine nucleotide exchange factor 6	2	1	16.1207	15.5958	16.2612	16.6101	15.9683	16.2952	15.9937	16.1706	16.0078
Q64726	Zinc-alpha-2-glycoprotein	10	10	25.5518	25.6438	25.5801	25.9476	25.9586	25.9546	25.5898	25.6566	25.6501
P80315	T-complex protein 1 subunit delta	21	21	26.875	26.897	26.8851	26.6168	27.1252	27.1352	26.9312	26.8555	26.99
A3KGI3	Kinetochore scaffold 1	2	2	20.7064	21.1326	21.2716	21.0264	21.2453	20.9609	21.3044	20.7541	21.1786
O55098	Serine/threonine-protein kinase 10	9	8	23.3992	23.5732	23.5923	23.7185	23.8334	23.5519	23.7235	23.2901	23.6471
Q9CX56	26S proteasome non-ATPase regulatory subunit 8	5	5	20.9314	20.7998	20.3405	21.5213	21.4867	21.6996	20.0308	20.8463	21.1638
O08547	Vesicle-trafficking protein SEC22b	3	3	21.3443	21.015	21.4985	21.8892	22.2025	22.3047	21.4166	21.5204	21.0484
Q03265	ATP synthase subunit alpha, mitochondrial	20	20	26.3158	25.8605	26.0356	26.5289	26.4347	26.5822	26.2611	25.9502	26.1489
P52430	Serum paraoxonase/arylesterase 1	11	11	28.8378	28.8251	28.8437	28.5246	28.53	28.4829	28.9241	28.9323	28.7734
Q8BYJ6	TBC1 domain family member 4	2	2	25.7383	25.7032	25.877	26.0912	25.8199	25.6703	25.8044	25.6623	25.9709
P32020	Sterol carrier protein 2	14	14	27.182	27.1123	27.0624	27.3758	27.4543	27.4622	27.1969	27.0738	27.2151
Q61160	FAS-associated death domain protein	2	2			20.2475		20.4165			20.2845	20.2986
E9QP99	Golgin subfamily A member 3	2	2	19.95		19.6135	20.2159	20.3695	20.1489		19.2924	20.23
Q99LB2	Dehydrogenase/reductase SDR family member 4	13	13	26.9935	26.9789	27.0609	27.3039	27.3471	27.1974	27.1557	26.9264	27.077
Q8C0E2	Vacuolar protein sorting-associated protein 26B	5	4	20.4543	20.509	20.2429	20.7393	20.574	20.8575	20.3241	20.0937	20.8344
Q8BPB5	EGF-containing fibulin-like extracellular matrix protein 1	8	8	25.8299	25.9709	25.6979	25.8553	25.9095	25.8311	25.968	25.5506	26.0784
P47878	Insulin-like growth factor-binding protein 3	16	16	27.9725	27.9121	27.8569	28.0134	28.0517	28.1297	27.9029	27.8164	28.1423
O09110	Dual specificity mitogen-activated protein kinase kinase 3	5	5	26.2564	26.4415	26.038	26.4593	26.5189	26.659	26.4508	26.0061	26.4092
Q99PL5	Ribosome-binding protein 1	44	44	28.3484	28.3343	28.397	28.7839	28.7933	28.8673	28.4387	28.315	28.4648
P01029	Complement C4-B	55	55	28.2937	28.2509	28.2541	28.3476	28.33	28.3903	28.3281	28.2653	28.3476
Q62093	Serine/arginine-rich splicing factor 2	5	5	25.631	25.3625	25.4574	25.168	25.2823	25.1738	25.1114	26.2636	24.7984
E9QQ18	Proteoglycan 4	24	24	28.2891	28.1904	28.2183	28.3828	28.4408	28.3065	28.327	28.1644	28.348
Q9WV32	Actin-related protein 2/3 complex subunit 1B	6	6	23.5484	23.3561	23.703	23.5826	23.4628	23.6971	23.543	23.5006	23.7225
P97443	Histone-lysine N-methyltransferase Smyd1	13	13	27.8531	27.9409	27.8715	27.8564	27.8118	27.8577	27.8142	28.0719	27.9173
Q9DBG3	AP-2 complex subunit beta	24	13	25.1224	25.0891	25.3615	25.1929	25.1882	25.2283	25.1364	25.3489	25.2449
P04940	Ig kappa chain V-VI region NQ2-17.4.1	2	1	24.6002	24.8256	24.84	24.8152	24.9225	24.9036	24.7712	24.7053	24.9454
Q8R1Q8	Cytoplasmic dynein 1 light intermediate chain 1	14	14	25.3981	25.0496	25.1501	25.0216	25.305	25.4128	25.4766	25.1663	25.1067
Q62426	Cystatin-B	3	3	19.6053	19.9975	20.1662	20.3731	20.0695	20.0788	20.2419	19.8372	19.8683
P61082	NEDD8-conjugating enzyme Ubc12	7	7	24.8874	24.5604	24.936	24.7006	24.6701	24.9944	24.9224	24.7163	24.9264
Q8BND5	Sulfhydryl oxidase 1	16	16	25.8722	25.8391	25.643	26.1726	26.2517	26.2513	26.0643	25.8595	25.5605
Q9CZH3	Proteasome assembly chaperone 3	2	2	19.3999	19.3147		19.808	19.9657	20.5345	19.6357	19.1257	19.4312
Q61129	Complement factor I	26	26	28.5335	28.4935	28.4853	28.6986	28.8192	28.7538	28.64	28.4988	28.5371
Q3U7R1	Extended synaptotagmin-1	3	3	19.4841	19.7783	19.1676	20.1384	20.3478	20.1679	19.6758	19.3478	19.6182
P39876	Metalloproteinase inhibitor 3	11	11	27.7293	27.3505	27.5631	26.6763	26.6147	26.8539	27.7376	27.5899	27.5019
B1AT82	Phosphoribosyl pyrophosphate synthase-associated protein 1	10	8	24.3544	24.0637	24.2419	24.3659	24.4305	24.439	24.3634	24.167	24.311
Q80UW8	DNA-directed RNA polymerases I, II, and III subunit RPABC1	2	2		16.2213	17.7121	17.0721	17.1038	17.6133	16.3612		17.7408
Q9CQZ5	NADH dehydrogenase [ubiquinone] 1 alpha subcomplex subunit 6	1	1	18.192	17.9731	18.4093	19.0109	19.0108	19.0016	18.3651	18.1381	18.2724
Q91ZJ5	UTP--glucose-1-phosphate uridylyltransferase	9	9	22.6148	22.3273	25.0373	22.8319	22.3808	22.8869	23.184	23.1943	24.7873
O08709	Peroxiredoxin-6	13	13	25.9923	25.8498	25.9353	26.1134	26.1912	26.11	26.0149	25.9644	25.9838
P62855	40S ribosomal protein S26	4	4	22.6427	23.4223	22.8641	22.7631	22.9837	23.0861	23.2931	22.9156	22.9906
Q8CF98	Collectin-10	7	7	23.7341	23.5741	24.0993	23.8183	24.0621	24.0654	23.7211	23.8902	24.0207
P62743	AP-2 complex subunit sigma	4	4	23.1739	23.8289	23.9091	23.9112	23.972	23.9829	23.7859	24.0029	23.3424
Q99JP6	Homer protein homolog 3	1	1	20.6311		20.9397	20.4341			21.0494		20.6347
Q3THK7	GMP synthase [glutamine-hydrolyzing]	15	15	25.0083	24.8358	25.0323	24.961	24.9234	24.9684	24.8577	24.9792	25.2144
Q8K3X4	Probable E3 ubiquitin-protein ligase IRF2BPL	1	1		15.3803		14.1782	15.2777		15.5179		15.3663
Q9R0N0	Galactokinase	12	12	26.1514	26.0124	26.2074	26.1993	26.7799	26.4947	26.1974	26.1235	26.2463
A0A140T8N9	Immunoglobulin kappa variable 6-32 (Fragment)	4	4	25.5832	25.5552	25.561	25.4444	25.4502	25.4023	25.7349	25.5864	25.5657
P97366	Ecotropic viral integration site 5 protein	4	4	24.5047	24.4096	24.3256	24.2803	24.5513	24.5213	24.5039	24.2665	24.6438
A0A0A6YXN4	Immunoglobulin heavy variable V1-18 (Fragment)	3	2	20.4943	20.4866	20.5719	21.1681	21.3425	21.2186	20.2842	20.8079	20.6161
E9PZD8	Ceruloplasmin	8	8	22.5819	23.0146	23.127	22.8717	22.9536	23.1749	22.7305	22.8425	23.334
Q8C0D5	Elongation factor-like GTPase 1	15	15	26.3924	26.4088	26.3507	26.4382	26.3686	26.4081	26.4617	26.3777	26.5135
B2RUR8	OTU domain-containing protein 7B	4	4	16.3835	16.8081	16.8494	17.0174	16.8846	17.0502			16.7634
A0A0B4J1E8	Chordin-like protein 2	1	1	15.0016	14.2772		15.019			14.7543
P62313	U6 snRNA-associated Sm-like protein LSm6	4	4	23.4508	23.5323	23.2071	22.3222	22.7537	22.6862	23.0924	22.9351	24.1001
P70362	Ubiquitin recognition factor in ER-associated degradation protein 1	9	9	26.6559	26.6408	26.7238	26.6134	26.5642	26.693	26.6004	26.8327	26.7901
P36552	Oxygen-dependent coproporphyrinogen-III oxidase, mitochondrial	17	17	25.3598	25.2147	25.4524	25.8047	25.8164	25.8109	25.6449	25.3809	25.186
Q8C547	HEAT repeat-containing protein 5B	2	2	18.062			18.5825	18.6601	18.4063		18.0762	18.1877
F6RBR6	NADH dehydrogenase [ubiquinone] 1 alpha subcomplex subunit 12	2	2	19.8372	19.8468	19.6615	20.2771	20.3514	20.4725	20.0375	19.4591	20.0007
A0A1Y7VM65	Glutaredoxin-1	2	2	24.5146	24.9902	23.4939	24.3284	24.9068	24.426	25.0425	23.9245	24.4031
Q04857	Collagen alpha-1(VI) chain	2	2	25.735	25.7477	25.5852	25.8576	26.1145	26.1242	25.7388	25.6225	25.9147
Q9JL62	Glycolipid transfer protein	4	4	22.2587	21.934	22.1118	22.5915	22.7005	22.6622	22.1682	22.3347	22.0203
P00186	Cytochrome P450 1A2	21	21	26.453	26.3343	26.4153	27.2508	27.4555	27.3681	26.5698	26.3178	26.5238
Q8BK64	Activator of 90 kDa heat shock protein ATPase homolog 1	10	10	24.9701	24.8669	24.9766	24.7771	25.0129	25.0059	24.9609	25.0393	25.0344
G3UW82	Myosin, heavy polypeptide 2, skeletal muscle, adult	87	22	26.6722	26.5394	26.4842	26.0095	26.1771	26.3541	26.6184	26.5637	26.738
P23953	Carboxylesterase 1C	4	4	20.6266	20.6039	20.4645	20.341	20.2797	19.4889	20.7888	20.6366	20.4834
P35235	Tyrosine-protein phosphatase non-receptor type 11	18	18	27.2421	27.1338	27.2182	27.345	27.2427	26.9459	27.3002	27.3473	27.1678
P06683	Complement component C9	25	25	28.1676	27.9866	28.3644	28.3194	28.3923	28.3607	28.2765	28.1642	28.3243
P27546	Microtubule-associated protein 4	24	15	25.2404	25.3256	24.9453	25.5036	25.5102	25.6754	25.3936	25.0664	25.286
Q8BPW9	Aspartyl aminopeptidase	1	1	15.1162	15.4253	14.7457	15.8598	15.5978		15.8258	14.228	15.1149
P52843	Sulfotransferase 2A1	15	5	28.6014	28.5866	28.6607	28.5939	28.4856	28.7637	28.5615	28.7543	28.7534
P80318	T-complex protein 1 subunit gamma	22	22	27.2394	27.1293	27.2433	27.2102	27.3977	27.3413	27.2489	27.3024	27.2934
Q80U87	Ubiquitin carboxyl-terminal hydrolase 8	9	9	21.2913	22.5234	21.503	21.9636	20.8325	22.4736	20.1763	22.559	22.2058
P0DP27	Calmodulin-2	5	5	22.7515	23.4083	22.6934	23.928	22.7549	23.0538	23.7075	22.724	22.4476
Q8K377	Leucine-rich repeat transmembrane neuronal protein 1	1	1	22.2461	22.0134	22.2794	22.2562	22.6646	22.1994	22.3096	22.0857	22.3736
Q78JE5	F-box only protein 22	2	2	19.371	19.634	19.4364	19.2865	19.7649	19.4432			19.5622
P21570	Angiogenin	1	1	18.025	18.4134	18.2107	18.5485	18.1634		18.1745	18.0086	18.6462
O70325	Phospholipid hydroperoxide glutathione peroxidase	11	11	25.0924	25.3261	25.4556	25.4718	25.2436	25.5203	25.3631	25.4945	25.2624
P56392	Cytochrome c oxidase subunit 7A1, mitochondrial	1	1	20.5218	20.5487	20.4221	20.7065	20.7729	20.911	20.7194	20.7443	20.2035
A0A087WNV1	Arf-GAP domain and FG repeat-containing protein 1	3	3	20.8108	20.8002	20.9244	21.1958	21.5001	21.2069	21.338	21.0767	20.0851
Q921G7	Electron transfer flavoprotein-ubiquinone oxidoreductase, mitochondrial	1	1	20.4824	20.8223	20.2724	20.6524	20.4214	19.7642	20.4368	20.7893
P62075	Mitochondrial import inner membrane translocase subunit Tim13	6	6	25.4211	24.391	25.3653	24.6907	25.6635	25.5244	25.106	25.3819	25.1259
P15105	Glutamine synthetase	10	10	23.2694	23.4614	23.1741	23.3717	23.2991	23.4296	23.5904	23.2973	23.2499
O70131	Ninjurin-1	1	1	16.9885		16.9037	17.147			17.0257		17.029
Q8BH00	2-aminomuconic semialdehyde dehydrogenase	19	19	27.2645	27.3665	27.4222	27.0495	27.3911	26.9657	27.4666	27.4986	27.33
Q99JY0	Trifunctional enzyme subunit beta, mitochondrial	18	18	25.8066	25.7207	25.8849	26.7013	26.4774	26.5756	25.9536	25.9135	25.7876
Q6Q477	Plasma membrane calcium-transporting ATPase 4	13	11	24.401	24.2817	24.2025	24.7068	24.9385	25.0743	24.451	24.2931	24.3872
Q61035	Histidine--tRNA ligase, cytoplasmic	19	19	26.0616	25.8899	26.196	26.2034	26.6304	26.3279	26.0987	26.3469	25.9351
Q8K1I3	Secreted phosphoprotein 24	3	3	23.8068	23.7759	23.5571	23.9412	24.1869	24.0619	23.803	23.6531	23.9316
Q6A028	Switch-associated protein 70	8	8	25.0899	25.0566	25.1748	23.8285	24.2425	23.2783	25.3172	25.0409	25.2014
P08003	Protein disulfide-isomerase A4	29	29	27.3334	27.2351	27.2111	27.8082	27.8546	27.8961	27.3998	27.2456	27.3811
Q68FH4	N-acetylgalactosamine kinase	5	5	22.6625	22.3682	22.3011	21.9555	22.5521	22.6175	22.4667	22.548	22.5896
A0A1B0GR85	RIKEN cDNA 2900026A02 gene	6	6	29.1751	29.1402	28.942	28.9749	29.2599	29.4816	29.1184	29.0712	29.317
Q99PT1	Rho GDP-dissociation inhibitor 1	4	4	22.7435	22.793	22.7831	23.1932	23.2404	23.0552	22.8836	22.8447	22.8451
O35593	26S proteasome non-ATPase regulatory subunit 14	7	7	22.4114	22.8214	22.0539	23.4398	22.6637	22.4875	23.0828	22.0833	22.2719
Q9D8U7	tRNA-uridine aminocarboxypropyltransferase 1	1	1	18.9782	18.2273	18.7608	18.3206		18.7778	19.1611	18.0698	18.8808
Q91VR7	Microtubule-associated proteins 1A/1B light chain 3A	2	1	20.0103						20.0951
Q14CH1	Molybdenum cofactor sulfurase	1	1	19.4684	19.2161	19.4963	19.8962	20.4647	20.0693	19.5471	18.9757	19.8083
Q9QYG0	Protein NDRG2	3	3	21.3016	21.1998	21.3368	20.4191	20.3856	20.4679	20.3391	21.424	21.9201
Q8BVI4	Dihydropteridine reductase	5	5	25.2308	25.083	25.2586	25.6941	25.9149	25.8753	25.1841	25.2983	25.3476
A0A140T8P3	Immunoglobulin kappa chain variable 15-103 (Fragment)	1	1	22.8012	22.8071	22.4335	22.8404	23.0261	23.2006	23.1977	22.0525	22.8546
Q921W2	Nucleolysin TIAR	4	4	23.3042	23.2021	23.8809	22.5796	22.9471	23.0988	23.0732	23.7983	23.7628
Q8K154	UDP-glucuronosyltransferase	8	7	24.3025	24.2285	23.9984	25.1119	25.114	24.8293	24.3352	24.2229	24.2462
Q05920	Pyruvate carboxylase, mitochondrial	23	23	26.1932	26.2243	26.2356	26.4565	26.4457	26.4355	26.3148	26.2316	26.3656
Q5SX40	Myosin-1	88	14	26.7189	26.7612	26.6432	26.775	27.0005	26.8956	26.8233	26.6797	26.8783
A2ATU0	Probable 2-oxoglutarate dehydrogenase E1 component DHKTD1, mitochondrial	8	8	19.105	19.1848	19.0364	20.6406	21.6906	21.8414	19.042	18.4899	19.7729
Q792Z1	Trypsin 10	1	1	23.4268	22.9522	23.3059	23.4288	23.4911	23.3386	23.4879	23.4144	23.0512
P09528	Ferritin heavy chain	1	1		15.8376		16.7623	16.5349				15.9258
Q9CQC9	GTP-binding protein SAR1b	8	6	26.0218	25.9119	25.9056	26.2161	26.165	26.4695	26.1205	25.9074	26.0767
Q6ZWV3	60S ribosomal protein L10	7	7	24.519	23.933	24.1687	24.5285	24.5279	24.7677	24.4643	24.1132	24.3536
Q91VM5	RNA binding motif protein, X-linked-like-1	4	4	23.7249	23.8387	23.4925	23.2045	22.5013	23.029	23.6961	23.8625	23.7858
P24456	Cytochrome P450 2D10	19	9	26.8111	26.6159	26.7086	27.5489	27.5931	27.5573	26.7414	26.7387	26.9272
A0A1D5RM67	PSME3-interacting protein (Fragment)	1	1	14.8531		14.6851			15.0332	15.2773	14.7607	14.4208
Q60649	Caseinolytic peptidase B protein homolog	8	8	21.7654	21.799	21.9044	21.9361	22.1609	21.7808	21.7768	21.9251	22.0362
P11859	Angiotensinogen	3	3	20.3781	20.3306	20.1761	20.6995	19.6549	20.238	19.4787	20.6334	20.7529
P62835	Ras-related protein Rap-1A	6	2	25.8754	26.0921	25.9317	26.2745	26.2065	26.2445	26.0343	25.9484	26.196
Q9WV06	Ankyrin repeat domain-containing protein 2	2	2	19.9973	20.702	20.0889	20.1124	20.267	20.3734	19.9087	20.5701	20.5981
Q6URW6	Myosin-14	6	1	21.1656	20.6993	21.0526	19.5738	20.2396	20.0418	21.2143	21.2117	20.7713
P63073	Eukaryotic translation initiation factor 4E	8	8	26.1499	26.0559	26.1181	26.1752	26.2952	26.2545	26.1454	26.2451	26.2176
P98063	Bone morphogenetic protein 1	12	12	22.3905	22.8168	23.0416	23.246	23.2988	23.2454	23.0001	22.453	23.0779
P70194	C-type lectin domain family 4 member F	2	2		20.394	20.3656	20.6008	19.8194	20.1444		20.3998	20.5473
P26645	Myristoylated alanine-rich C-kinase substrate	7	7	23.8254	23.9237	23.8047	23.7099	23.5789	23.902	23.737	23.972	24.1105
Q62356	Follistatin-related protein 1	1	1	18.0087	18.5022		18.3747	18.498	18.9055	18.9214	18.0967	17.8796
B1AU25	Apoptosis-inducing factor 1, mitochondrial	7	7	27.6162	27.5293	27.6008	25.9282	25.9677	26.2209	27.7213	27.5712	27.7379
O55222	Integrin-linked protein kinase	19	19	26.3701	26.541	26.4909	26.0617	26.2257	26.2489	26.5406	26.6418	26.51
Q99J56	Derlin-1	2	2	19.0576		18.6845	19.601	19.3285		18.7532		19.1756
Q62189	U1 small nuclear ribonucleoprotein A	8	6	24.2556	24.0692	24.2529	24.4676	24.5891	24.4938	24.179	24.3915	24.2989
P11247	Myeloperoxidase	1	1	17.4696	17.6829		17.685			17.8468	16.9761	18.0118
Q05117	Tartrate-resistant acid phosphatase type 5	5	5	21.4256	19.9926	21.2788	21.1284	18.6276	20.5291	20.891	21.3698	21.0702
Q8CJG0	Protein argonaute-2	32	28	26.7827	26.7574	26.6943	26.9027	27.2556	27.0122	26.9319	26.7955	26.8002
V9GXK0	Predicted gene 12117	2	2	21.2668	20.957				20.6397	21.2708	21.0151	21.3515
P24369	Peptidyl-prolyl cis-trans isomerase B	14	14	27.6106	27.598	27.6964	28.2623	28.234	28.2895	27.745	27.6104	27.8419
E9Q4K7	Kinesin family member 13B	18	17	24.8565	25.0553	24.9868	24.6802	24.9562	24.6998	24.65	25.6035	24.7542
E9QPX1	Collagen alpha-1(XVIII) chain	1	1	16.9864	16.8712	16.2298	17.0045	17.0023	16.7165	17.0696		16.5497
Q8VCH6	Delta(24)-sterol reductase	3	3	23.9818	23.9344	23.5438	22.7588	22.9946	23.2249	23.8558	23.711	24.1918
Q00PI9	Heterogeneous nuclear ribonucleoprotein U-like protein 2	2	2		20.2912	20.4141	20.6257	20.6778	20.6856	20.4342	20.6779	20.2165
Q8QZT1	Acetyl-CoA acetyltransferase, mitochondrial	12	12	28.7662	28.5582	28.5636	28.8274	28.7656	28.8651	28.7362	28.669	28.7948
Q3UH60	Disco-interacting protein 2 homolog B	4	4	21.2011	20.6917	21.1523	22.0829	22.0902	22.0917	21.1995	20.66	21.4375
Q99LM3	Smoothelin-like protein 1	1	1		20.7839		20.9102	21.0297	21.4193	20.7918	21.0339	20.8208
Q91XV3	Brain acid soluble protein 1	3	3	20.61	20.5954	20.4587	21.3318	21.045	21.3775	20.3946	20.7907	20.7615
Q8BFR1	Zinc finger CCCH-type antiviral protein 1-like	1	1	20.1291	20.2881		19.1603	19.1384	19.3221			20.3148
P06728	Apolipoprotein A-IV	28	28	32.2976	32.1131	32.2182	31.9959	32.0546	32.0122	32.3283	32.2913	32.3274
E9Q8W9	Ubiquitin carboxyl-terminal hydrolase	1	1	23.5538	23.6732	23.5663	23.7728	23.5355	23.618	23.7675	23.5802	23.7558
L7N1Y0	Dynein, axonemal, heavy chain 7B	1	1		20.3469	20.0534		19.9009	20.2013	20.1696	20.2238	20.521
P50752	Troponin T, cardiac muscle	5	5	21.4523	21.1544	21.544	19.2852		19.8231	21.8097	21.2033	21.4163
P20852	Cytochrome P450 2A5	19	11	26.1124	26.061	26.1358	27.1562	27.0887	27.1262	26.3618	26.1085	26.1476
Q9EP75	Leukotriene-B4 omega-hydroxylase 3	5	5	20.8828	20.7951	20.6494	22.4726	22.2577	22.3318	20.7872	20.6071	21.1997
Q6ZQ38	Cullin-associated NEDD8-dissociated protein 1	38	38	28.2335	28.107	28.1881	28.4361	28.4809	28.3617	28.3055	28.3292	28.2183
Q3UJB9	Enhancer of mRNA-decapping protein 4	6	6	21.6645	20.987	21.5821			21.0226	21.2377	21.7083	21.6574
Q922D8	C-1-tetrahydrofolate synthase, cytoplasmic	42	42	29.1131	29.102	29.0547	29.3641	29.4382	29.3973	29.254	29.1459	29.1931
P01872	Immunoglobulin heavy constant mu	17	17	27.7526	27.6158	27.583	27.7756	27.9586	27.8198	27.7245	27.8404	27.7138
Q9ES97	Reticulon-3	4	4	23.4392	20.8246	23.397	21.1378	21.2997	21.0901	23.1151	22.929	23.1182
F8WGM5	Syntaxin-binding protein 2 (Fragment)	1	1	19.6732	19.4598	18.7353		19.2492	20.0559	19.2132	19.603	19.508
Q80Y56	Rabenosyn-5	4	4	20.8857	20.3461	20.4902	20.4602	21.5395	20.6011	20.5504	21	20.5007
Q9D9M0	Serine protease 52	1	1	22.1449	22.3342	22.1478	22.3887	22.5042	22.4783	22.3838	22.2457	22.3307
P97863	Nuclear factor 1 B-type	3	2	23.5808	23.6181	23.3894	23.8556	23.8851	23.7923	23.3666	23.8041	23.7209
P47963	60S ribosomal protein L13	9	9	25.8887	25.8047	25.8657	25.6565	25.6091	26.055	26.2407	25.8711	25.729
A0A0R4J1L2	Elongation factor 1-delta	14	2	27.0403	26.9975	27.1029	27.4985	27.4195	27.3957	27.2092	27.1868	27.0731
Q9BDB7	Interferon-induced protein 44-like	2	2	16.9023	14.7081	16.8955	15.9959	15.4858	16.6998	17.1937	16.02	16.2235
Q80SW1	S-adenosylhomocysteine hydrolase-like protein 1	13	7	25.4228	25.3854	25.5894	25.6343	25.4102	25.3929	25.6112	25.5067	25.6201
Q9CS42	Ribose-phosphate pyrophosphokinase 2	7	4	21.0253	21.0708	20.89	21.3687	20.7837	20.8909	21.8788	20.25	20.6868
Q3TBU7	Arf-GAP domain and FG repeat-containing protein 2 (Fragment)	2	2	19.8871	19.6719	19.9107	19.9133	20.2979	20.0386		19.8288	20.0492
A0A075B5R3	Immunoglobulin heavy variable 7-2	2	1			20.4111	20.3344	21.0162	20.6007	20.4776	20.5897	20.5133
Q99LD4	COP9 signalosome complex subunit 1	14	14	23.7104	23.077	23.4814	23.6097	23.9913	23.5331	23.559	23.3536	23.7493
Q52KI8	Serine/arginine repetitive matrix protein 1	2	2	21.9892	22.1566	22.1812	23.0812	23.0179	23.1776	22.4617	22.1291	22.0618
O88351	Inhibitor of nuclear factor kappa-B kinase subunit beta	8	8	18.5576			18.6377	19.0069		18.6698	18.6258	18.7264
Q8VC77	Akr1c20 protein	7	2	21.5792	21.3111	21.6228	19.9133	20.1772	20.2505	21.6793	21.3155	21.8402
P27005	Protein S100-A8	2	2	25.224	24.8188	24.9407	25.2459	25.2319	25.4129	24.5978	25.4951	25.1364
O70622	Reticulon-2	1	1		20.2172	20.2143	20.3493	20.5761	20.7132	20.0138	20.303	20.6244
Q9JK38	Glucosamine 6-phosphate N-acetyltransferase	4	4	22.3357	22.4201	22.2809	22.0829	22.4568	22.1947	22.6613	22.4959	22.2063
Q9D855	Cytochrome b-c1 complex subunit 7	3	3	22.7367	22.6507	21.7676	23.3483	22.7378	22.7447	22.7605	22.247	22.6429
Q9JHK5	Pleckstrin	9	9	26.1442	26.3152	26.4205	25.6626	25.5698	25.9502	26.4931	26.2718	26.4796
Q6PGF7	Exocyst complex component 8	5	5	22.8894	23.1498	23.1088	22.5476	22.2643	22.5252	22.9883	23.3058	23.2113
Q91WT7	3-alpha-hydroxysteroid dehydrogenase type 1	14	13	25.2934	25.2982	25.2786	25.138	25.609	25.4626	25.5123	25.4186	25.2966
Q9ESP1	Stromal cell-derived factor 2-like protein 1	3	3	22.0256	21.9224	22.0139	22.115	22.1325	23.0831	21.6277	21.7666	22.691
A2AQ07	Tubulin beta-1 chain	10	7	25.6179	25.5917	25.7681	26.2013	26.1959	26.1341	25.7714	25.813	25.7653
Q6ZPJ3	(E3-independent) E2 ubiquitin-conjugating enzyme UBE2O	41	41	28.1873	28.1747	28.2557	28.4761	28.4043	28.4061	28.4598	28.1512	28.3579
Q8BYN5	FSD1-like protein	1	1	16.0047	15.9627	15.6439	16.3209	16.3342	15.8781	15.8617		16.1296
Q9R092	17-beta-hydroxysteroid dehydrogenase type 6	9	5	23.8342	23.115	23.3276	24.6037	24.432	24.1684	23.8702	23.1837	23.6103
Q6R0H7	Guanine nucleotide-binding protein G(s) subunit alpha isoforms XLas	6	6	23.9161	23.8408	23.9398	24.094	24.0301	23.86	24.2244	23.7692	24.0434
Q99M74	Keratin, type II cuticular Hb2	1	1	19.2945	19.4298	19.0322	19.6879	19.9311	19.9808	19.5672	18.8341	19.6306
Q62523	Zyxin	13	13	25.2779	25.4559	25.3242	25.424	25.6223	25.6382	25.4371	25.4021	25.5948
P19157	Glutathione S-transferase P 1	8	8	26.6322	26.4449	26.6307	26.5504	26.9946	26.7038	26.7573	26.7915	26.5341
Q9CPY7	Cytosol aminopeptidase	21	21	27.3851	27.0705	27.1666	27.5854	27.5656	27.6047	27.2773	27.2879	27.4501
Q9QUJ7	Long-chain-fatty-acid--CoA ligase 4	8	8	24.2664	24.1197	24.2257	24.0414	24.1538	24.2579	24.3222	24.2352	24.433
Q9CPR4	60S ribosomal protein L17	6	6	24.9713	25.1793	25.1786	25.5065	25.4734	25.5862	25.1975	25.1074	25.4019
A0A2I3BRQ1	Expressed sequence AI182371	11	11	24.0385	23.7677	23.8446	23.9813	24.2208	24.1539	24.0956	23.7546	24.1705
P14069	Protein S100-A6	3	3	24.2401	23.5545	24.0838	23.6636	23.6396	24.2888	24.2402	24.2623	23.8074
D3Z479	Sorting nexin-15	3	3	20.3863		19.9844	20.8956	20.7634	21.1046	20.6983	19.7486	20.3869
P62242	40S ribosomal protein S8	11	11	27.0452	26.82	26.8881	25.8316	25.8934	25.8332	26.706	27.4513	26.8907
P62889	60S ribosomal protein L30	6	6	25.3466	24.9483	25.388	24.4848	24.6199	25.2713	25.5027	25.3831	25.216
Q921W4	Quinone oxidoreductase-like protein 1	4	4	23.4407	23.2797	23.4161	23.3968	23.46	23.262	23.599	23.4755	23.4567
E9QKK8	Phospholipid-transporting ATPase	1	1		16.4861	16.2014	18.5901	18.5389	18.4891	16.9905	15.5487	16.5589
Q8CHT0	Delta-1-pyrroline-5-carboxylate dehydrogenase, mitochondrial	13	13	27.1454	27.1949	27.3277	27.9148	27.9269	27.967	27.4491	27.1635	27.4418
Q9D0M5	Dynein light chain 2, cytoplasmic	5	2	23.7611	23.8665	23.7241	24.4966	24.9473	24.9023	24.1727	23.5686	23.9491
[truncated: 1,416 more rows]

## Sheet: S3
Table S3. List of proteins coinciding with Exocarta and Vesiclepedia.
[truncated: 68 more rows]

## Sheet: S4
Table S5. List of proteins significantly changed in E-vEV.
[truncated: 969 more rows]

[truncated: 9 more sheets: S5, S6, S7, S8, S9, S10, S11, S12, S13]
